# Supplementary material for: Health effects associated with exposure to secondhand smoke: a Burden of Proof study
Source: PubMed Central journal article supplement (PMC10803272; doi:10.1038/s41591-023-02743-4), 2024-01-09
Supplement: 41591_2023_2743_MOESM1_ESM.pdf [file 41591_2023_2743_MOESM1_ESM.pdf]

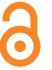

---

# Health effects associated with exposure to secondhand smoke: a Burden of Proof study

---

In the format provided by the authors and unedited

## Table of Contents

|                                                                                                                                                                       |     |
|-----------------------------------------------------------------------------------------------------------------------------------------------------------------------|-----|
| Section 1: Data source identification and assessment .....                                                                                                            | 3   |
| Section 1.1: Literature searches.....                                                                                                                                 | 3   |
| Section 1.1.1: PubMed search strings.....                                                                                                                             | 3   |
| Section 1.1.2: Web of Science Search Strings .....                                                                                                                    | 10  |
| Section 1.2: Inclusion and exclusion criteria.....                                                                                                                    | 14  |
| Section 1.3: Outcome definitions .....                                                                                                                                | 15  |
| Table S1. Definitions of nine included health outcomes .....                                                                                                          | 15  |
| Section 1.4: PRISMA diagrams .....                                                                                                                                    | 18  |
| Section 1.5: Data extraction.....                                                                                                                                     | 27  |
| Table S2. Data Extraction Template.....                                                                                                                               | 27  |
| Section 2: Data Inputs.....                                                                                                                                           | 36  |
| Section 2.1: Study characteristics .....                                                                                                                              | 37  |
| Table S3. Summary of study characteristics .....                                                                                                                      | 37  |
| Section 2.2: Effect size data details.....                                                                                                                            | 93  |
| Table S4. Summary of data inputs ischemic heart disease.....                                                                                                          | 95  |
| Table S5. Summary of data inputs for stroke.....                                                                                                                      | 101 |
| Table S6. Summary of data inputs for tracheal, bronchus, and lung cancer .....                                                                                        | 104 |
| Table S7. Summary of data inputs for breast cancer.....                                                                                                               | 122 |
| Table S8. Summary of data inputs for asthma.....                                                                                                                      | 129 |
| Table S9. Summary of data inputs for lower respiratory infections.....                                                                                                | 145 |
| Table S10. Summary of data inputs for chronic obstructive pulmonary disease .....                                                                                     | 153 |
| Table S12. Summary of data inputs for diabetes mellitus type 2.....                                                                                                   | 158 |
| Table S12. Summary of data inputs for otitis media.....                                                                                                               | 160 |
| Section 3: Sensitivity Analyses .....                                                                                                                                 | 163 |
| Section 3.1: Sensitivity analyses results.....                                                                                                                        | 164 |
| Table S13. Strength of the evidence for the relationship between secondhand smoking when including prospective cohort studies only .....                              | 164 |
| Table S14. Strength of the evidence for the relationship between secondhand smoking when including observations from never-smokers only .....                         | 165 |
| Table S15. Strength of the evidence for the relationship between secondhand smoking when including prospective cohorts and observations from never-smokers only ..... | 166 |
| Table S16. Strength of the evidence for the relationship between secondhand smoking and asthma when including data from children aged 16 or less only .....           | 167 |

|                                                                                                |     |
|------------------------------------------------------------------------------------------------|-----|
| Section 4: GATHER and PRISMA checklists .....                                                  | 168 |
| Section 4.1: PRISMA.....                                                                       | 168 |
| Table S17. PRISMA 2020 Abstract Checklist .....                                                | 168 |
| Table S18. PRISMA 2020 Manuscript Checklist .....                                              | 169 |
| Section 4.2: GATHER .....                                                                      | 171 |
| Table S19. GATHER Checklist .....                                                              | 171 |
| Section 5: Study quality & bias assessment.....                                                | 172 |
| Table S20. Bias covariates tested in the primary model for each health outcome, by study ..... | 175 |
| Section 6: Between-study Heterogeneity .....                                                   | 216 |
| Table S21. Between-study heterogeneity (gamma) for each risk-outcome pair.....                 | 216 |

## Section 1: Data source identification and assessment

Data for the present analysis was identified through two systematic reviews for each of our nine health outcomes of interest. Each data source was evaluated on the basis of pre-established inclusion criteria described in Section 1.2.

### *Section 1.1: Literature searches*

We conducted separate systematic reviews for ischemic heart disease (IHD); stroke; type 2 diabetes mellitus; lower respiratory infections; breast cancer; tracheal, bronchus, and lung cancer; otitis media; asthma; and chronic obstructive pulmonary disease (COPD). These reviews encompassed two databases: PubMed and Web of Science. These databases were selected to cover a broad swath of peer-reviewed global and regional literature. The search strings were last run on August 2, 2022, for PubMed, and September 27-28, 2022, for Web of Science to capture all studies, irrespective of publication language, published from January 1, 1970 through July 31, 2022. The search strings used for each outcome-database search are shown below.

#### **Section 1.1.1: PubMed search strings**

##### *Ischemic Heart Disease*

(Tobacco smoke pollution [MeSH Terms] OR second-hand[Title/Abstract] OR secondhand[Title/Abstract] OR environmental tobacco[Title/Abstract] OR tobacco smoke[Title/Abstract] OR cigarette smoke[Title/Abstract] OR passive smok\*[Title/Abstract] OR involuntary smok\*[Title/Abstract] OR parental smoking[Title/Abstract] OR maternal smoking[Title/Abstract]) AND

(Coronary Artery Disease[Mesh] OR Myocardial Ischemia[Mesh] OR atherosclerosis[Mesh] OR Coronary Artery Disease[TiAb] OR Myocardial Ischemia[TiAb] OR cardiac ischemia[TiAb] OR silent ischemia[TiAb] OR atherosclerosis [TiAb] OR Ischaemic heart disease[TiAb] OR Ischemic heart disease[TiAb] OR coronary heart disease[TiAb] OR myocardial infarction[TiAb] OR heart attack[TiAb] OR heart infarction[TiAb]) AND

(Case-Control Studies[MeSH Terms] OR Cross-Over Studies[MeSH Terms] OR Cohort Studies[MeSH Terms] OR Systematic Review[Publication Type] OR Meta-Analysis[Publication Type] OR “systematic review”[Title/Abstract] OR “meta-analysis”[Title/Abstract] OR “cohort”[Title/Abstract] OR “cross-over”[Title/Abstract] OR “crossover”[Title/Abstract] OR “case-control”[Title/Abstract] OR “prospective”[Title/Abstract] OR “retrospective”[Title/Abstract] OR “longitudinal”[Title/Abstract] OR “follow-up”[Title/Abstract] OR Dose-Response Relationship, Drug[MeSH Terms] OR “dose-response”[Title/Abstract]) AND

(Risk[MeSH Terms] OR Odds Ratio[MeSH Terms] OR “risk”[Title/Abstract] OR “odds ratio”[Title/Abstract] OR “cross-product ratio”[Title/Abstract] OR “hazards ratio”[Title/Abstract] OR “hazard ratio”[Title/Abstract]) AND

(“2020/01/01”[Pdat] : “2022/07/31”[Pdat]) NOT

(animals[MeSH Terms] NOT Humans[MeSH Terms])

### Stroke

(Tobacco smoke pollution [MeSH Terms] OR second-hand[Title/Abstract] OR secondhand[Title/Abstract] OR environmental tobacco[Title/Abstract] OR tobacco smoke[Title/Abstract] OR cigarette smoke[Title/Abstract] OR passive smok\*[Title/Abstract] OR involuntary smok\*[Title/Abstract] OR parental smoking[Title/Abstract] OR maternal smoking[Title/Abstract]) AND

(brain infarction[MeSH Terms] OR stroke[MeSH Terms] OR intracranial hemorrhages[MeSH Terms] OR "stroke"[Title/Abstract] OR "brain infarction"[Title/Abstract] OR "cerebral infarction"[Title/Abstract] OR "intracerebral hemorrhage"[Title/Abstract] OR "intracerebral haemorrhage"[Title/Abstract] OR "subarachnoid hemorrhage"[Title/Abstract] OR "subarachnoid haemorrhage"[Title/Abstract]) AND

(Case-Control Studies[MeSH Terms] OR Cross-Over Studies[MeSH Terms] OR Cohort Studies[MeSH Terms] OR Systematic Review[Publication Type] OR Meta-Analysis[Publication Type] OR "systematic review"[Title/Abstract] OR "meta-analysis"[Title/Abstract] OR "cohort"[Title/Abstract] OR "cross-over"[Title/Abstract] OR "crossover"[Title/Abstract] OR "case-control"[Title/Abstract] OR "prospective"[Title/Abstract] OR "retrospective"[Title/Abstract] OR "longitudinal"[Title/Abstract] OR "follow-up"[Title/Abstract] OR Dose-Response Relationship, Drug[MeSH Terms] OR "dose-response"[Title/Abstract]) AND

(Risk[MeSH Terms] OR Odds Ratio[MeSH Terms] OR "risk"[Title/Abstract] OR "odds ratio"[Title/Abstract] OR "cross-product ratio"[Title/Abstract] OR "hazards ratio"[Title/Abstract] OR "hazard ratio"[Title/Abstract]) AND

("2020/01/01"[Pdat] : "2022/07/31"[Pdat]) NOT

(animals[MeSH Terms] NOT Humans[MeSH Terms])

### Type 2 Diabetes mellitus

(Tobacco smoke pollution [MeSH Terms] OR second-hand[Title/Abstract] OR secondhand[Title/Abstract] OR environmental tobacco[Title/Abstract] OR tobacco smoke[Title/Abstract] OR cigarette smoke[Title/Abstract] OR passive smok\*[Title/Abstract] OR involuntary smok\*[Title/Abstract] OR parental smoking[Title/Abstract] OR maternal smoking[Title/Abstract]) AND

(Diabetes Mellitus, Type 2[MeSH Terms] OR "diabetes"[Title/Abstract]) AND

(Case-Control Studies[MeSH Terms] OR Cross-Over Studies[MeSH Terms] OR Cohort Studies[MeSH Terms] OR Systematic Review[Publication Type] OR Meta-Analysis[Publication Type] OR "systematic review"[Title/Abstract] OR "meta-analysis"[Title/Abstract] OR "cohort"[Title/Abstract] OR "cross-over"[Title/Abstract] OR "crossover"[Title/Abstract] OR "case-control"[Title/Abstract] OR "prospective"[Title/Abstract] OR "retrospective"[Title/Abstract] OR "longitudinal"[Title/Abstract] OR "follow-up"[Title/Abstract] OR Dose-Response Relationship, Drug[MeSH Terms] OR "dose-response"[Title/Abstract]) AND

(Risk[MeSH Terms] OR Odds Ratio[MeSH Terms] OR “risk”[Title/Abstract] OR “odds ratio”[Title/Abstract] OR “cross-product ratio”[Title/Abstract] OR “hazards ratio”[Title/Abstract] OR “hazard ratio”[Title/Abstract]) AND

(“1970/01/01”[Pdat] : “2022/07/31”[Pdat]) NOT

(animals[MeSH Terms] NOT Humans[MeSH Terms])

### Lower respiratory infections

(Tobacco smoke pollution [MeSH Terms] OR second-hand[Title/Abstract] OR secondhand[Title/Abstract] OR environmental tobacco[Title/Abstract] OR tobacco smoke[Title/Abstract] OR cigarette smoke[Title/Abstract] OR passive smok\*[Title/Abstract] OR involuntary smok\*[Title/Abstract] OR parental smoking[Title/Abstract] OR maternal smoking[Title/Abstract]) AND

(pneumonia[MeSH Terms] OR bronchiolitis[MeSH Terms] OR “lower respiratory”[Title/Abstract] OR “pneumonia”[Title/Abstract] OR “bronchiolitis”[Title/Abstract] OR “pulmonary inflammation”[Title/Abstract] OR “lung inflammation”[Title/Abstract]) AND

(Case-Control Studies[MeSH Terms] OR Cross-Over Studies[MeSH Terms] OR Cohort Studies[MeSH Terms] OR Systematic Review[Publication Type] OR Meta-Analysis[Publication Type] OR “systematic review”[Title/Abstract] OR “meta-analysis”[Title/Abstract] OR “cohort”[Title/Abstract] OR “cross-over”[Title/Abstract] OR “crossover”[Title/Abstract] OR “case-control”[Title/Abstract] OR “prospective”[Title/Abstract] OR “retrospective”[Title/Abstract] OR “longitudinal”[Title/Abstract] OR “follow-up”[Title/Abstract] OR Dose-Response Relationship, Drug[MeSH Terms] OR “dose-response”[Title/Abstract]) AND

(Risk[MeSH Terms] OR Odds Ratio[MeSH Terms] OR “risk”[Title/Abstract] OR “odds ratio”[Title/Abstract] OR “cross-product ratio”[Title/Abstract] OR “hazards ratio”[Title/Abstract] OR “hazard ratio”[Title/Abstract]) AND

(“1970/01/01”[Pdat] : “2022/07/31”[Pdat]) NOT

(animals[MeSH Terms] NOT Humans[MeSH Terms])

### Breast cancer

(Tobacco smoke pollution [MeSH Terms] OR second-hand[Title/Abstract] OR secondhand[Title/Abstract] OR environmental tobacco[Title/Abstract] OR tobacco smoke[Title/Abstract] OR cigarette smoke[Title/Abstract] OR passive smok\*[Title/Abstract] OR involuntary smok\*[Title/Abstract] OR parental smoking[Title/Abstract] OR maternal smoking[Title/Abstract]) AND

(breast neoplasm[MeSH Terms] OR “breast cancer”[Title/Abstract] OR “breast cancers”[Title/Abstract] OR “breast neoplasm”[Title/Abstract] OR “breast neoplasms”[Title/Abstract] OR “mammary cancer”[MeSH Terms] OR “mammary cancers”[Title/Abstract] OR “breast malignant neoplasm”[Title/Abstract] OR “breast malignant neoplasms”[Title/Abstract] OR “mammary carcinoma”[Title/Abstract] OR “mammary carcinomas”[Title/Abstract] OR “breast carcinoma”[Title/Abstract] OR “breast carcinomas”[Title/Abstract] OR “mammary neoplasm”[Title/Abstract] OR “mammary neoplasms”[Title/Abstract] OR “breast tumor”[Title/Abstract] OR “breast tumors”[Title/Abstract] OR “cancer of the breast”[Title/Abstract] OR “cancers of the breast”[Title/Abstract] OR “neoplasm of the breast”[Title/Abstract] OR “tumor of the breast”[Title/Abstract]) AND

(Case-Control Studies[MeSH Terms] OR Cross-Over Studies[MeSH Terms] OR Cohort Studies[MeSH Terms] OR Systematic Review[Publication Type] OR Meta-Analysis[Publication Type] OR “systematic review”[Title/Abstract] OR “meta-analysis”[Title/Abstract] OR “cohort”[Title/Abstract] OR “cross-over”[Title/Abstract] OR “crossover”[Title/Abstract] OR “case-control”[Title/Abstract] OR “prospective”[Title/Abstract] OR “retrospective”[Title/Abstract] OR “longitudinal”[Title/Abstract] OR “follow-up”[Title/Abstract] OR Dose-Response Relationship, Drug[MeSH Terms] OR “dose-response”[Title/Abstract]) AND

(Risk[MeSH Terms] OR Odds Ratio[MeSH Terms] OR “risk”[Title/Abstract] OR “odds ratio”[Title/Abstract] OR “cross-product ratio”[Title/Abstract] OR “hazards ratio”[Title/Abstract] OR “hazard ratio”[Title/Abstract]) AND

(“2020/01/01”[Pdat] : “2022/07/31”[Pdat]) NOT (animals[MeSH Terms] NOT Humans[MeSH Terms])

### Tracheal, bronchus, and lung cancer

((lung neoplasm[MeSH Terms] OR "lung cancer"[Title/Abstract] OR "lung cancers"[Title/Abstract] OR "lung neoplasms"[Title/Abstract] OR "pulmonary neoplasm"[Title/Abstract] OR "pulmonary cancer"[Title/Abstract] OR "pulmonary cancers"[Title/Abstract] OR "pulmonary neoplasms"[Title/Abstract] OR "lung malignant neoplasm"[Title/Abstract] OR "lung malignant neoplasms"[Title/Abstract] OR "pulmonary malignant neoplasm"[Title/Abstract] OR "pulmonary malignant neoplasms"[Title/Abstract] OR "pulmonary carcinoma"[Title/Abstract] OR "pulmonary carcinomas"[Title/Abstract] OR "lung carcinoma"[Title/Abstract] OR "lung carcinomas"[Title/Abstract] OR "lung tumor"[Title/Abstract] OR "pulmonary tumors"[Title/Abstract] OR "cancer of the lung"[Title/Abstract] OR "cancers of the lung"[Title/Abstract] OR "neoplasm of the lung"[Title/Abstract] OR "tumor of the lung"[Title/Abstract] OR "bronchus cancer"[Title/Abstract] OR "bronchi cancer"[Title/Abstract] OR "bronchial cancer"[Title/Abstract] OR "bronchus cancers"[Title/Abstract] OR "bronchi cancers"[Title/Abstract] OR "bronchial cancers"[Title/Abstract] OR "bronchus neoplasm"[Title/Abstract] OR "bronchi neoplasm"[Title/Abstract] OR "bronchial neoplasm"[Title/Abstract] OR "bronchus neoplasms"[Title/Abstract] OR "bronchi neoplasms"[Title/Abstract] OR "bronchial neoplasms"[Title/Abstract] OR "bronchus malignant neoplasm"[Title/Abstract] OR "bronchi malignant neoplasm"[Title/Abstract] OR "bronchial malignant neoplasm"[Title/Abstract] OR "bronchus malignant neoplasms"[Title/Abstract] OR "bronchi malignant neoplasms"[Title/Abstract] OR "bronchial malignant neoplasms"[Title/Abstract] OR "bronchus carcinoma"[Title/Abstract] OR "bronchi carcinoma"[Title/Abstract] OR "bronchial carcinoma"[Title/Abstract] OR "bronchus carcinomas"[Title/Abstract] OR "bronchi carcinomas"[Title/Abstract] OR "bronchial carcinomas"[Title/Abstract] OR "bronchus tumor"[Title/Abstract] OR "bronchi tumor"[Title/Abstract] OR "bronchial tumor"[Title/Abstract] OR "bronchus tumors"[Title/Abstract] OR "bronchi tumors"[Title/Abstract] OR "bronchial tumors"[Title/Abstract] OR "cancer of the bronchus"[Title/Abstract] OR "cancer of the bronchi"[Title/Abstract] OR "cancers of the bronchus"[Title/Abstract] OR "cancers of the bronchi"[Title/Abstract] OR "neoplasm of the bronchus"[Title/Abstract] OR "neoplasm of the bronchi"[Title/Abstract] OR "neoplasms of the bronchus"[Title/Abstract] OR "neoplasms of the bronchi"[Title/Abstract] OR "tumor of the bronchus"[Title/Abstract] OR "tumor of the bronchi"[Title/Abstract] OR "tumors of the bronchus"[Title/Abstract] OR "tumors of the bronchi"[Title/Abstract] OR "trachea cancer"[Title/Abstract] OR "tracheal cancer"[Title/Abstract] OR "trachea cancers"[Title/Abstract] OR "tracheal cancers"[Title/Abstract] OR "trachea neoplasm"[Title/Abstract] OR "tracheal neoplasm"[Title/Abstract] OR "trachea neoplasms"[Title/Abstract] OR "tracheal neoplasms"[Title/Abstract] OR "trachea malignant neoplasm"[Title/Abstract] OR "tracheal malignant neoplasm"[Title/Abstract] OR "trachea malignant neoplasms"[Title/Abstract] OR "tracheal malignant neoplasms"[Title/Abstract] OR "trachea carcinoma"[Title/Abstract] OR "tracheal carcinoma"[Title/Abstract] OR "trachea carcinomas"[Title/Abstract] OR "tracheal carcinomas"[Title/Abstract] OR "trachea tumor"[Title/Abstract] OR "tracheal tumor"[Title/Abstract] OR "trachea tumors"[Title/Abstract] OR "tracheal tumors"[Title/Abstract] OR "cancer of the trachea"[Title/Abstract] OR "cancers of the trachea"[Title/Abstract] OR "neoplasm of the trachea"[Title/Abstract] OR "neoplasms of the trachea"[Title/Abstract] OR "tumor of the bronchus"[Title/Abstract] OR "tumor of the bronchi"[Title/Abstract] OR "tumors of the bronchus"[Title/Abstract] OR "tumors of the bronchi"[Title/Abstract])) AND



((Case-Control Studies[MeSH Terms] OR Cross-Over Studies[MeSH Terms] OR Cohort Studies[MeSH Terms] OR Systematic Review[Publication Type] OR Meta-Analysis[Publication Type] OR “systematic review”[Title/Abstract] OR “meta-analysis”[Title/Abstract] OR “cohort”[Title/Abstract] OR “cross-over”[Title/Abstract] OR “crossover”[Title/Abstract] OR “case-control”[Title/Abstract] OR “prospective”[Title/Abstract] OR “retrospective”[Title/Abstract] OR “longitudinal”[Title/Abstract] OR “follow-up”[Title/Abstract] OR Dose-Response Relationship, Drug[MeSH Terms] OR “dose-response”[Title/Abstract]))) AND

((Risk[MeSH Terms] OR Odds Ratio[MeSH Terms] OR “risk”[Title/Abstract] OR “odds ratio”[Title/Abstract] OR “cross-product ratio”[Title/Abstract] OR “hazards ratio”[Title/Abstract] OR “hazard ratio”[Title/Abstract]))) AND

(“1970/01/01”[Pdat] : “2022/07/31”[Pdat])) NOT

((animals[MeSH Terms] NOT Humans[MeSH Terms]))

### Otitis media

(Tobacco smoke pollution [MeSH Terms] OR “second-hand”[Title/Abstract] OR “secondhand”[Title/Abstract] OR “environmental tobacco”[Title/Abstract] OR “tobacco smoke”[Title/Abstract] OR “cigarette smoke”[Title/Abstract] OR passive smok\*[Title/Abstract] OR involuntary smok\*[Title/Abstract] OR “parental smoking”[Title/Abstract] OR “maternal smoking”[Title/Abstract]) AND

(Otitis Media[MeSH Terms] OR “otitis media”[Title/Abstract] OR “middle ear infection” [Title/Abstract] OR “middle ear disease” [Title/Abstract] OR “ear infection”[Title/Abstract] OR “ear disease”[Title/Abstract] OR “otitis” [Title/Abstract]) AND

(Case-Control Studies[MeSH Terms] OR Cross-Over Studies[MeSH Terms] OR Cohort Studies[MeSH Terms] OR Systematic Review[Publication Type] OR Meta-Analysis[Publication Type] OR “systematic review”[Title/Abstract] OR “meta-analysis”[Title/Abstract] OR “cohort”[Title/Abstract] OR “cross-over”[Title/Abstract] OR “crossover”[Title/Abstract] OR “case-control”[Title/Abstract] OR “prospective”[Title/Abstract] OR “retrospective”[Title/Abstract] OR “longitudinal”[Title/Abstract] OR “follow-up”[Title/Abstract] OR Dose-Response Relationship, Drug[MeSH Terms] OR “dose-response”[Title/Abstract]) AND

(Risk[MeSH Terms] OR Odds Ratio[MeSH Terms] OR “risk”[Title/Abstract] OR “odds ratio”[Title/Abstract] OR “cross-product ratio”[Title/Abstract] OR “hazards ratio”[Title/Abstract] OR “hazard ratio”[Title/Abstract]) AND

(“2020/01/01”[Pdat] : “2022/07/31”[Pdat])) NOT

((animals[MeSH Terms] NOT Humans[MeSH Terms]))

### Asthma

(Tobacco smoke pollution [MeSH Terms] OR second-hand[Title/Abstract] OR secondhand[Title/Abstract] OR environmental tobacco[Title/Abstract] OR tobacco smoke[Title/Abstract] OR cigarette smoke[Title/Abstract] OR passive smok\*[Title/Abstract] OR involuntary smok\*[Title/Abstract] OR parental smoking[Title/Abstract] OR maternal smoking[Title/Abstract]) AND

("Asthma"[Mesh] OR "asthma"[tiab]) AND

(Case-Control Studies[MeSH Terms] OR Cross-Over Studies[MeSH Terms] OR Cohort Studies[MeSH Terms] OR Systematic Review[Publication Type] OR Meta-Analysis[Publication Type] OR "systematic review"[Title/Abstract] OR "meta-analysis"[Title/Abstract] OR "cohort"[Title/Abstract] OR "cross-over"[Title/Abstract] OR "crossover"[Title/Abstract] OR "case-control"[Title/Abstract] OR "prospective"[Title/Abstract] OR "retrospective"[Title/Abstract] OR "longitudinal"[Title/Abstract] OR "follow-up"[Title/Abstract] OR Dose-Response Relationship, Drug[MeSH Terms] OR "dose-response"[Title/Abstract]) AND

(Risk[MeSH Terms] OR Odds Ratio[MeSH Terms] OR "risk"[Title/Abstract] OR "odds ratio"[Title/Abstract] OR "cross-product ratio"[Title/Abstract] OR "hazards ratio"[Title/Abstract] OR "hazard ratio"[Title/Abstract]) AND

("1970/01/01"[Pdat] : "2022/07/31"[Pdat]) NOT

(animals[MeSH Terms] NOT Humans[MeSH Terms])

### Chronic obstructive pulmonary disease

(Tobacco smoke pollution [MeSH Terms] OR second-hand[Title/Abstract] OR secondhand[Title/Abstract] OR environmental tobacco[Title/Abstract] OR tobacco smoke[Title/Abstract] OR cigarette smoke[Title/Abstract] OR passive smok\*[Title/Abstract] OR involuntary smok\*[Title/Abstract] OR parental smoking[Title/Abstract] OR maternal smoking[Title/Abstract]) AND

(Pulmonary Disease, Chronic Obstructive[Mesh] OR "COPD"[ Title/Abstract] OR "emphysema"[ Title/Abstract] OR "chronic obstructive pulmonary disease"[ Title/Abstract]) AND

(Case-Control Studies[MeSH Terms] OR Cross-Over Studies[MeSH Terms] OR Cohort Studies[MeSH Terms] OR Systematic Review[Publication Type] OR Meta-Analysis[Publication Type] OR "systematic review"[Title/Abstract] OR "meta-analysis"[Title/Abstract] OR "cohort"[Title/Abstract] OR "cross-over"[Title/Abstract] OR "crossover"[Title/Abstract] OR "case-control"[Title/Abstract] OR "prospective"[Title/Abstract] OR "retrospective"[Title/Abstract] OR "longitudinal"[Title/Abstract] OR "follow-up"[Title/Abstract] OR Dose-Response Relationship, Drug[MeSH Terms] OR "dose-response"[Title/Abstract]) AND

(Risk[MeSH Terms] OR Odds Ratio[MeSH Terms] OR "risk"[Title/Abstract] OR "odds ratio"[Title/Abstract] OR "cross-product ratio"[Title/Abstract] OR "hazards ratio"[Title/Abstract] OR "hazard ratio"[Title/Abstract]) AND

("2020/01/01"[Pdat] : "2022/07/31"[Pdat]) NOT

(animals[MeSH Terms] NOT Humans[MeSH Terms])

### Section 1.1.2: Web of Science Search Strings

#### Ischemic Heart Disease

(TS=(smok\* NEAR/4 exposure) OR TS=second\$hand OR TS="environmental tobacco" OR (TS="tobacco smok\* pollution" OR TS="tobacco smok\*") OR TS="cigarette smok\*" OR TS="passive smok\*" OR TS="involuntary smok\*" OR TS="parental smok\*" OR TS="maternal smok\*") AND

(TS="coronary artery disease" OR TS="myocardial isch\$emia" OR TS="cardiac isch\$emia" OR TS="silent isch\$emia" OR TS=atherosclerosis OR TS="isch\$emic heart disease" OR TS="coronary heart disease" OR TS="myocardial infarction" OR TS="heart attack" OR TS="heart infarction") AND

(TS="systematic review" OR TS=meta\$analysis OR TS=cohort OR TS=cross\$over OR TS=case\$control OR TS=prospective OR TS=retrospective OR TS=longitudinal OR TS=follow\$up OR TS=dose\$response) AND

(TS=risk OR TS="odds ratio" OR TS="cross\$product ratio" OR TS="hazard\$ ratio") AND

DOP=1970-01-01/2022-07-31 NOT

(TS=animal\$ NOT TS=human\$)

#### Stroke

(TS=(smok\* NEAR/4 exposure) OR TS=second\$hand OR TS="environmental tobacco" OR (TS="tobacco smok\* pollution" OR TS="tobacco smok\*") OR TS="cigarette smok\*" OR TS="passive smok\*" OR TS="involuntary smok\*" OR TS="parental smok\*" OR TS="maternal smoking") AND

(TS=stroke OR TS="brain infarction" OR TS="cerebral infarction" OR TS="isch\$emic stroke" OR TS="cerebral h\$emorrhage" OR TS="intracerebral h\$emorrhage" OR TS="subarachnoid h\$emorrhage") AND

(TS="systematic review" OR TS=meta\$analysis OR TS=cohort OR TS=cross\$over OR TS=case\$control OR TS=prospective OR TS=retrospective OR TS=longitudinal OR TS=follow\$up OR TS=dose\$response) AND

(TS=risk OR TS="odds ratio" OR TS="cross\$product ratio" OR TS="hazard\$ ratio") AND

DOP=1970-01-01/2022-07-31 NOT

(TS=animal\$ NOT TS=human\$)

### Type 2 Diabetes mellitus

(TS=(smok\* NEAR/4 expsoure) OR TS=second\$hand OR TS="environmental tobacco" OR (TS="tobacco smok\* pollution" OR TS="tobacco smok\*") OR TS="cigarette smok\*" OR TS="passive smok\*" OR TS="involuntary smok\*" OR TS="parental smok\*" OR TS="maternal smok\*") AND

(TS="diabetes mellitus type 2" OR TS="type 2 diabetes mellitus" OR TS=diabetes) AND

(TS="systematic review" OR TS=meta\$analysis OR TS=cohort OR TS=cross\$over OR TS=case\$control OR TS=prospective OR TS=retrospective OR TS=longitudinal OR TS=follow\$up OR TS=dose\$response) AND

(TS=risk OR TS="odds ratio" OR TS="cross\$product ratio" OR TS="hazard\$ ratio") AND

DOP=1970-01-01/2022-07-31 NOT

(TS=animal\$ NOT TS=human\$)

### Lower respiratory infections

(TS=(smok\* NEAR/4 exposure) OR TS=second\$hand OR TS="environmental tobacco" OR (TS="tobacco smok\* pollution" OR TS="tobacco smok\*") OR TS="cigarette smok\*" OR TS="passive smok\*" OR TS="involuntary smok\*" OR TS="parental smok\*" OR TS="maternal smok\*") AND

(TS=pneumonia OR TS=bronchiolitis OR TS="lower respiratory" OR TS="pulmonary inflammation" OR TS="lung inflammation") AND

(TS="systematic review" OR TS=meta\$analysis OR TS=cohort OR TS=cross\$over OR TS=case\$control OR TS=prospective OR TS=retrospective OR TS=longitudinal OR TS=follow\$up OR TS=dose\$response) AND

(TS=risk OR TS="odds ratio" OR TS="cross\$product ratio" OR TS="hazard\$ ratio") AND

DOP=1970-01-01/2022-07-31 NOT

(TS=animal\$ NOT TS=human\$)

### Breast cancer

(TS=(smok\* NEAR/4 exposure) OR TS=second\$hand OR TS="environmental tobacco" OR (TS="tobacco smok\* pollution" OR TS="tobacco smok\*") OR TS="cigarette smok\*" OR TS="passive smok\*" OR TS="involuntary smok\*" OR TS="parental smok\*" OR TS="maternal smok\*") AND

(TS="breast cancer\$" OR TS="breast neoplasm\$" OR TS="mammary cancer\$" OR TS="breast malignant neoplasm\$" OR TS="mammary carcinoma\$" OR TS="breast carcinoma\$" OR TS="mammary neoplasm\$" OR TS="breast tumo\$r\$" OR TS="mammary tumo\$r\$" OR TS="cancer\$ of the breast" OR TS="neoplasm\$ of the breast" OR TS="tumo\$r\$ of the breast") AND

(TS="systematic review" OR TS=meta\$analysis OR TS=cohort OR TS=cross\$over OR TS=case\$control OR TS=prospective OR TS=retrospective OR TS=longitudinal OR TS=follow\$up OR TS=dose\$response) AND

(TS=risk OR TS="odds ratio" OR TS="cross\$product ratio" TS="hazard\$ ratio") AND

DOP=1970-01-01/2022-07-31 NOT

(TS=animal\$ NOT TS=human\$)

Tracheal, bronchus, and lung cancer

(TS=(smok\* NEAR/4 exposure) OR TS=second\$hand OR TS="environmental tobacco" OR (TS="tobacco smok\* pollution" OR TS="tobacco smok\*") OR TS="cigarette smok\*" OR TS="passive smok\*" OR TS="involuntary smok\*" OR TS="parental smok\*" OR TS="maternal smok\*") AND

(TS="lung neoplasm" OR TS="lung neoplasms" OR TS="lung cancer" OR TS="lung cancer" OR TS="pulmonary neoplasm" OR TS="pulmonary neoplasms" OR TS="pulmonary cancer" OR TS="pulmonary cancers" OR TS="lung malignant neoplasm" OR TS="lung malignant neoplasms" OR TS="pulmonary malignant neoplasm" OR TS="pulmonary malignant neoplasms" OR TS="pulmonary carcinoma" OR TS="pulmonary carcinomas" OR TS="lung carcinoma" OR TS="lung carcinomas" OR TS="lung tumor" OR TS="lung tumors" OR TS="pulmonary tumor" OR TS="pulmonary tumors" OR TS="cancer of the lung" OR TS="cancers of the lung" OR TS="neoplasm of the lung" OR TS="neoplasms of the lung" OR TS="tumor of the lung" OR TS="tumors of the lung" OR TS="bronch\* cancer" OR TS="bronch\* cancers" OR TS="bronch\* neoplasm" OR TS="bronch\* neoplasms" OR TS="bronch\* malignant neoplasm" OR TS="bronch\* malignant neoplasms" OR TS="bronch\* carcinoma" OR TS="bronch\* carcinomas" OR TS="bronch\* tumor" OR TS="bronch\* tumors" OR TS="cancer of the bronch\*" OR TS="cancers of the bronch\*" OR TS="neoplasm of the bronch\*" OR TS="neoplasms of the bronch\*" OR TS="tumor of the bronch\*" OR TS="tumors of the bronch\*" OR TS="trache\* cancer" OR TS="trache\* cancers" OR TS="trache\* neoplasm" OR TS="trache\* neoplasms" OR TS="trache\* malignant neoplasm" OR TS="trache\* malignant neoplasms" OR TS="trache\* carcinoma" OR TS="trache\* carcinomas" OR TS="trache\* tumor" OR TS="trache\* tumors" OR TS="cancer of the trachea" OR TS="cancers of the trachea" OR TS="neoplasm of the trachea" OR TS="neoplasms of the trachea") AND

(TS="systematic review" OR TS=meta\$analysis OR TS=cohort OR TS=cross\$over OR TS=case\$control OR TS=prospective OR TS=retrospective OR TS=longitudinal OR TS=follow\$up OR TS=dose\$response) AND

(TS=risk OR TS="odds ratio" OR TS="cross\$product ratio" OR TS="hazard\$ ratio") AND

DOP=1970-01-01/2022-07-31 NOT

(TS=animal\$ NOT TS=human\$)

Otitis media

(TS=(smok\* NEAR/4 exposure) OR TS=second\$hand OR TS="environmental tobacco" OR (TS="tobacco smok\* pollution" OR TS="tobacco smok\*") OR TS="cigarette smok\*" OR TS="passive smok\*" OR TS="involuntary smok\*" OR TS="parental smok\*" OR TS="maternal smok\*") AND

(TS="otitis media" OR TS=otitis OR TS="middle ear infection" OR TS="middle ear disease" OR TS="ear infection" OR TS="ear disease") AND

(TS="systematic review" OR TS=meta\$analysis OR TS=cohort OR TS=cross\$over OR TS=case\$control OR TS=prospective OR TS=retrospective OR TS=longitudinal OR TS=follow\$up OR TS=dose\$response) AND

(TS=risk OR TS="odds ratio" OR TS="cross\$product ratio" OR TS="hazard\$ ratio") AND

DOP=1970-01-01/2022-07-31 NOT

(TS=animal\$ NOT TS=human\$)

### Asthma

(TS=(smok\* NEAR/4 exposure) OR TS=second\$hand OR TS="environmental tobacco" OR (TS="tobacco smok\* pollution" OR TS="tobacco smok\*") OR TS="cigarette smok\*" OR TS="passive smok\*" OR TS="involuntary smok\*" OR TS="parental smok\*" OR TS="maternal smok\*") AND

TS=asthma AND

(TS="systematic review" OR TS=meta\$analysis OR TS=cohort OR TS=cross\$over OR TS=case\$control OR TS=prospective OR TS=retrospective OR TS=longitudinal OR TS=follow\$up OR TS=dose\$response) AND

(TS=risk OR TS="odds ratio" OR TS="cross\$product ratio" OR TS="hazard\$ ratio") AND

DOP=1970-01-01/2022-07-31 NOT

(TS=animal\$ NOT TS=human\$)

### Chronic obstructive pulmonary disease

(TS=(smok\* NEAR/4 exposure) OR TS=second\$hand OR TS="environmental tobacco" OR (TS="tobacco smok\* pollution" OR TS="tobacco smok\*") OR TS="cigarette smok\*" OR TS="passive smok\*" OR TS="involuntary smok\*" OR TS="parental smok\*" OR TS="maternal smok\*") AND

(TS="chronic obstructive pulmonary disease" OR TS=COPD OR TS=emphysema OR TS="chronic bronchitis") AND

(TS="systematic review" OR TS=meta\$analysis OR TS=cohort OR TS=cross\$over OR TS=case\$control OR TS=prospective OR TS=retrospective OR TS=longitudinal OR TS=follow\$up OR TS=dose\$response) AND

(TS=risk OR TS="odds ratio" OR TS="cross\$product ratio" OR TS="hazard\$ ratio") AND

DOP=1970-01-01/2022-07-31 NOT

(TS=animal\$ NOT TS=human\$)

## *Section 1.2: Inclusion and exclusion criteria*

Studies were screened on the basis of pre-determined inclusion and exclusion criteria. These criteria were readily available for all reviewers to consult and were described in detail to the research team prior to screening.

### **Inclusion criteria:**

- Publication date: Study was published on or after January 1, 1970.
- Publication published in English.
- Study design: Study uses a prospective cohort, retrospective cohort, case-cohort, case-control, nested case-control, or case-crossover study design.
- Diverse study sample: Study subjects are not from a highly specific subpopulation (e.g., cancer survivors or diabetes patients) that would more likely than not interfere with the generalizability of the findings.
- Acceptable study definition of risk: Study reports current or ever postnatal secondhand smoke exposure at home, work, or at a broader broader/unspecified location (e.g., any location) among the non-smoker, never smoker and/or former smoker population, with a dichotomous exposure measurement. Any source of exposure was accepted (e.g., maternal, paternal, spouse, any). Studies measuring exposure through direct self-report were accepted, as well as those using a proxy of exposure (e.g., living with a smoker).
- Acceptable study definition of outcome: Study reports the outcome of interest relative to our pre-determined definition of the same outcome, in whole or in part. Both gold-standard outcome definitions and alternative were accepted for inclusion (Table S1).
- Report of relative measure of risk: An effect size or study metadata, such as sample sizes or numbers of cases and controls to produce a crude effect size, is reported for the relationship between the secondhand smoke exposure and the outcomes of interest.
- Minimum required data available: Data are reported to fill in all required fields in the extraction form (Table S2).
- Non duplicate study: The study has not had the same data extracted previously from another study.

### **Exclusion criteria:**

- Publication date: Study was published before January 1, 1970.
- Irrelevant study design: Study does not use a design from the family of cohort and case-control study designs.
- Highly specific subpopulation: Study focuses on a very specific subpopulation (e.g., cancer survivors or diabetes patients) that would more likely than not interfere with the generalizability of the findings.
- Non secondhand smoke exposure: Study does not specifically report results on secondhand smoke exposure (e.g., reports the risk associated with active smoking).

- Undesired definition: Study reports exposure to prenatal exposure to tobacco smoke only (i.e., fetus is exposed during pregnancy by smoking mother or others); Study only reports exposure to secondhand smoke in specific settings other than home or work (i.e., work or home exposure is not reported nor the study reports on broad locations of exposure in which home or work are likely to be included). Study reports exposure measured in a continuous or categorical scale. We excluded any study only reporting on former exposure. For IHD, Stroke, breast and lung cancers, COPD, and type 2 diabetes we excluded studies only reporting exposure during the childhood.
- No report of relative measure of risk: No effect sizes or study metadata are reported for the relationship between the risk and the outcome of interest.
- Minimum required data not present: Not enough data are reported to fill out the required fields in the extraction form.
- Duplicate study: The data reported from a study has been extracted from the same study in another report.

### Section 1.3: Outcome definitions

The outcomes examined in this review were defined in accordance with the health outcome definitions used in the Global Burden of Disease study.

**Table S1. Definitions of nine included health outcomes**

| Cause Name             | Definition                                                                                                                                                                                                                                                                                                                                                                                                                                                                                                                                                                                                                                                                                                                                                                                                                                                                                                                                                                                                                                                                                                                                                                                                                                                                                                                                                                                                                                                                                                                                                                                                                                                                                                                                                                                                                                                                                          |
|------------------------|-----------------------------------------------------------------------------------------------------------------------------------------------------------------------------------------------------------------------------------------------------------------------------------------------------------------------------------------------------------------------------------------------------------------------------------------------------------------------------------------------------------------------------------------------------------------------------------------------------------------------------------------------------------------------------------------------------------------------------------------------------------------------------------------------------------------------------------------------------------------------------------------------------------------------------------------------------------------------------------------------------------------------------------------------------------------------------------------------------------------------------------------------------------------------------------------------------------------------------------------------------------------------------------------------------------------------------------------------------------------------------------------------------------------------------------------------------------------------------------------------------------------------------------------------------------------------------------------------------------------------------------------------------------------------------------------------------------------------------------------------------------------------------------------------------------------------------------------------------------------------------------------------------|
| Ischemic heart disease | <ul style="list-style-type: none"> <li>• <i>Acute myocardial infarction (MI)</i>: Definite and possible MI according to the third universal definition of myocardial infarction <ul style="list-style-type: none"> <li>• When there is clinical evidence of myocardial necrosis in a clinical setting consistent with myocardial ischaemia OR</li> <li>• Detection of a rise and/or fall of cardiac biomarker values and with at least one of the following: <ul style="list-style-type: none"> <li>• Symptoms of ischaemia,</li> <li>• New or presumed new ST-segment-T wave changes or new left bundle branch block,</li> <li>• Development of pathological Q waves in the ECG,</li> <li>• Imaging evidence of new loss of viable myocardium or new regional wall motion abnormality, or</li> <li>• Identification of an intracoronary thrombus by angiography or autopsy</li> </ul> </li> <li>• Sudden (abrupt) unexplained cardiac death, involving cardiac arrest or no evidence of a non-coronary cause of death</li> <li>• Prevalent MI is considered to last from the onset of the event to 28 days after the event and is divided into an acute phase (0-2 days) and subacute (3-28 days)</li> </ul> </li> <li>• <i>Chronic IHD</i>: <ul style="list-style-type: none"> <li>• Angina; clinically diagnosed stable exertional angina pectoris or definite angina pectoris according to the Rose Angina Questionnaire, physician diagnosis, or taking nitrate medication for the relief of chest pain</li> </ul> </li> <li>• Asymptomatic ischaemic heart disease following myocardial infarction; survival to 28 days following incident MI. The GBD study does not use estimates based on ECG evidence for prior MI, due to its limited specificity and sensitivity.</li> <li>• Also called coronary heart disease or coronary artery disease or atherosclerotic heart disease.</li> </ul> |



**Table S1. Definitions of nine included health outcomes**

| Cause Name                   | Definition                                                                                                                                                                                                                                                                                                                                                                                                                                                                                                                                                                                                                                                                                                                                                                                                                                                                                                                                                                                                                                      |
|------------------------------|-------------------------------------------------------------------------------------------------------------------------------------------------------------------------------------------------------------------------------------------------------------------------------------------------------------------------------------------------------------------------------------------------------------------------------------------------------------------------------------------------------------------------------------------------------------------------------------------------------------------------------------------------------------------------------------------------------------------------------------------------------------------------------------------------------------------------------------------------------------------------------------------------------------------------------------------------------------------------------------------------------------------------------------------------|
|                              | ICD-10 codes: I20-I21.6, I21.9-I25.9, Z82.4-Z82.49, I20-I25.9<br>ICD-9 codes: 410-414.9, V17.3                                                                                                                                                                                                                                                                                                                                                                                                                                                                                                                                                                                                                                                                                                                                                                                                                                                                                                                                                  |
| Stroke                       | <p>Stroke was defined according to WHO criteria of rapidly developed clinical signs of focal disturbance of cerebral function lasting &gt; 24 hours or leading to death. Strokes are categorized as ischemic, intracerebral, and subarachnoid events, depending on whether they are caused by a blockage or rupture of the blood vessels in the brain.</p> <ul style="list-style-type: none"><li>• Ischemic stroke: An episode of neurological dysfunction due to focal cerebral, spinal, or retinal infarction; also known as acute infarction, atherothrombotic stroke, cerebral infarction, embolic stroke, thrombotic stroke or occlusion of cerebral arteries.</li><li>• Intracerebral stroke: Stroke with a focal collection of blood in the brain not due to trauma; also known as intracerebral hematoma or intraparenchymal hemorrhage.</li><li>• Subarachnoid hemorrhage: Non-traumatic stroke due to bleeding into the subarachnoid space of the brain.</li></ul> <p>ICD-10 codes: I60, I61, I63, I69.0<br/>ICD-9 codes: 430-434</p> |
| Type 2 Diabetes mellitus     | <p>Type 2 diabetes is a chronic condition, mostly in adults, where the body forms a resistance to insulin or the pancreas stops producing enough insulin. GBD defines type 2 diabetes as fasting plasma glucose <math>\geq 7</math> mmol/L (126 mg/dL) or those currently treated with drugs or insulin, where fasting plasma glucose is measured from glycated hemoglobin (HbA1c), oral glucose tolerance test (OGTT), or post-prandial glucose test (PPG).</p> <p>ICD-10 codes: E08-E08.11, E08.3-E08.9, E12-E12.1, E12.3-E13.11, E13.3-E14.1, E14.3-E14.9, R73-R73.9<br/>ICD-9 codes: 249-249.31, 249.5-249.91, 362.01-362.07, 790.2-790.29</p>                                                                                                                                                                                                                                                                                                                                                                                              |
| Lower respiratory infections | <p>This cause incorporates death and disability resulting from lower respiratory infections, including clinician-diagnosed and self-reported cases of pneumonia and bronchiolitis, including self-reported symptoms of acute lower respiratory infections including cough with difficulty breathing, fever, and symptoms in the chest.</p> <p>ICD-10 codes: A48.1, J09-J22, J85.1, P23-P23.9, U04<br/>ICD-9 codes: 073.0-073.6, 079.82, 466-469, 480-489, 513.0, 770.0</p>                                                                                                                                                                                                                                                                                                                                                                                                                                                                                                                                                                      |
| Breast cancer                | <p>This cause includes death and disability resulting from invasive neoplasms of the breasts, comprised of the connective tissue, glandular tissue, and soft parts.</p>                                                                                                                                                                                                                                                                                                                                                                                                                                                                                                                                                                                                                                                                                                                                                                                                                                                                         |

---

**Table S1. Definitions of nine included health outcomes**

---

| Cause Name                            | Definition                                                                                                                                                                                                                                                                                                                                                                                                                                                                                                                                         |
|---------------------------------------|----------------------------------------------------------------------------------------------------------------------------------------------------------------------------------------------------------------------------------------------------------------------------------------------------------------------------------------------------------------------------------------------------------------------------------------------------------------------------------------------------------------------------------------------------|
|                                       | ICD-10 codes: C50-C50.9, D05-D05.9, D24-D24.9, D48.6, D49.3, Z12.3-Z12.39, Z80.3, Z85.3, Z86                                                                                                                                                                                                                                                                                                                                                                                                                                                       |
|                                       | ICD-9 codes: 174-175.9, 217-217.8, 233.0, 238.3, 239.3, 610-610.9, V10.3, V16.3                                                                                                                                                                                                                                                                                                                                                                                                                                                                    |
| Tracheal, bronchus, and lung cancer   | This cause includes death and disability resulting from invasive neoplasms of the trachea, bronchi, and lungs.                                                                                                                                                                                                                                                                                                                                                                                                                                     |
|                                       | ICD-10 codes: C33-C34.9, D02.1-D02.3, D14.2-D14.3, D38.1, Z12.2, Z80.1- Z80.2, Z85.1-Z85.20                                                                                                                                                                                                                                                                                                                                                                                                                                                        |
|                                       | ICD-9 codes: 162-162.9, 209.21, 212.2-212.3, 231.1-231.2, 235.7, V10.1-V10.20, V16.1- V16.2, V16.4-V16.40                                                                                                                                                                                                                                                                                                                                                                                                                                          |
| Otitis media                          | Otitis media is an infection of the middle ear space, including acute otitis media, chronic otitis media, and chronic suppurative otitis media. Study definitions that do not specify middle ear infection or includes otitis media with effusion, also known as “glue ear”, are excluded from the present analyses.                                                                                                                                                                                                                               |
|                                       | ICD-10 codes: H65-H75.83                                                                                                                                                                                                                                                                                                                                                                                                                                                                                                                           |
|                                       | ICD-9 codes: 381-384.9                                                                                                                                                                                                                                                                                                                                                                                                                                                                                                                             |
| Asthma                                | Asthma is a chronic lung disease characterized by reversible airway obstruction due to spasms and secretions in the bronchi usually resulting from an allergic reaction or hypersensitivity and causing difficulty in breathing. Cases are defined as having a doctor’s diagnosis and wheezing in the past year. Alternative case definitions include: Self-reported asthma in the past year, self-reported asthma ever, a doctor’s diagnosis in the past year, and wheezing in the past year. The time component of the case definition is exact. |
|                                       | ICD-10 codes: J45, J46                                                                                                                                                                                                                                                                                                                                                                                                                                                                                                                             |
|                                       | ICD-9 codes: 493                                                                                                                                                                                                                                                                                                                                                                                                                                                                                                                                   |
| Chronic obstructive pulmonary disease | COPD is a disease characterized by persistent respiratory symptoms and airflow limitation due to airway and/or alveolar abnormalities, usually caused by significant long-term exposure to noxious particles or gases. COPD includes emphysema and chronic bronchitis and may also be known as chronic obstructive lung disease.                                                                                                                                                                                                                   |
|                                       | ICD-10 codes: J41-J42.4, J43-J44.9                                                                                                                                                                                                                                                                                                                                                                                                                                                                                                                 |
|                                       | ICD-9 codes: 491-492.9, 496-499                                                                                                                                                                                                                                                                                                                                                                                                                                                                                                                    |

---

Section 1.4: PRISMA diagrams

Figure S1: PRISMA 2020 flow diagram for secondhand smoke and ischemic heart disease

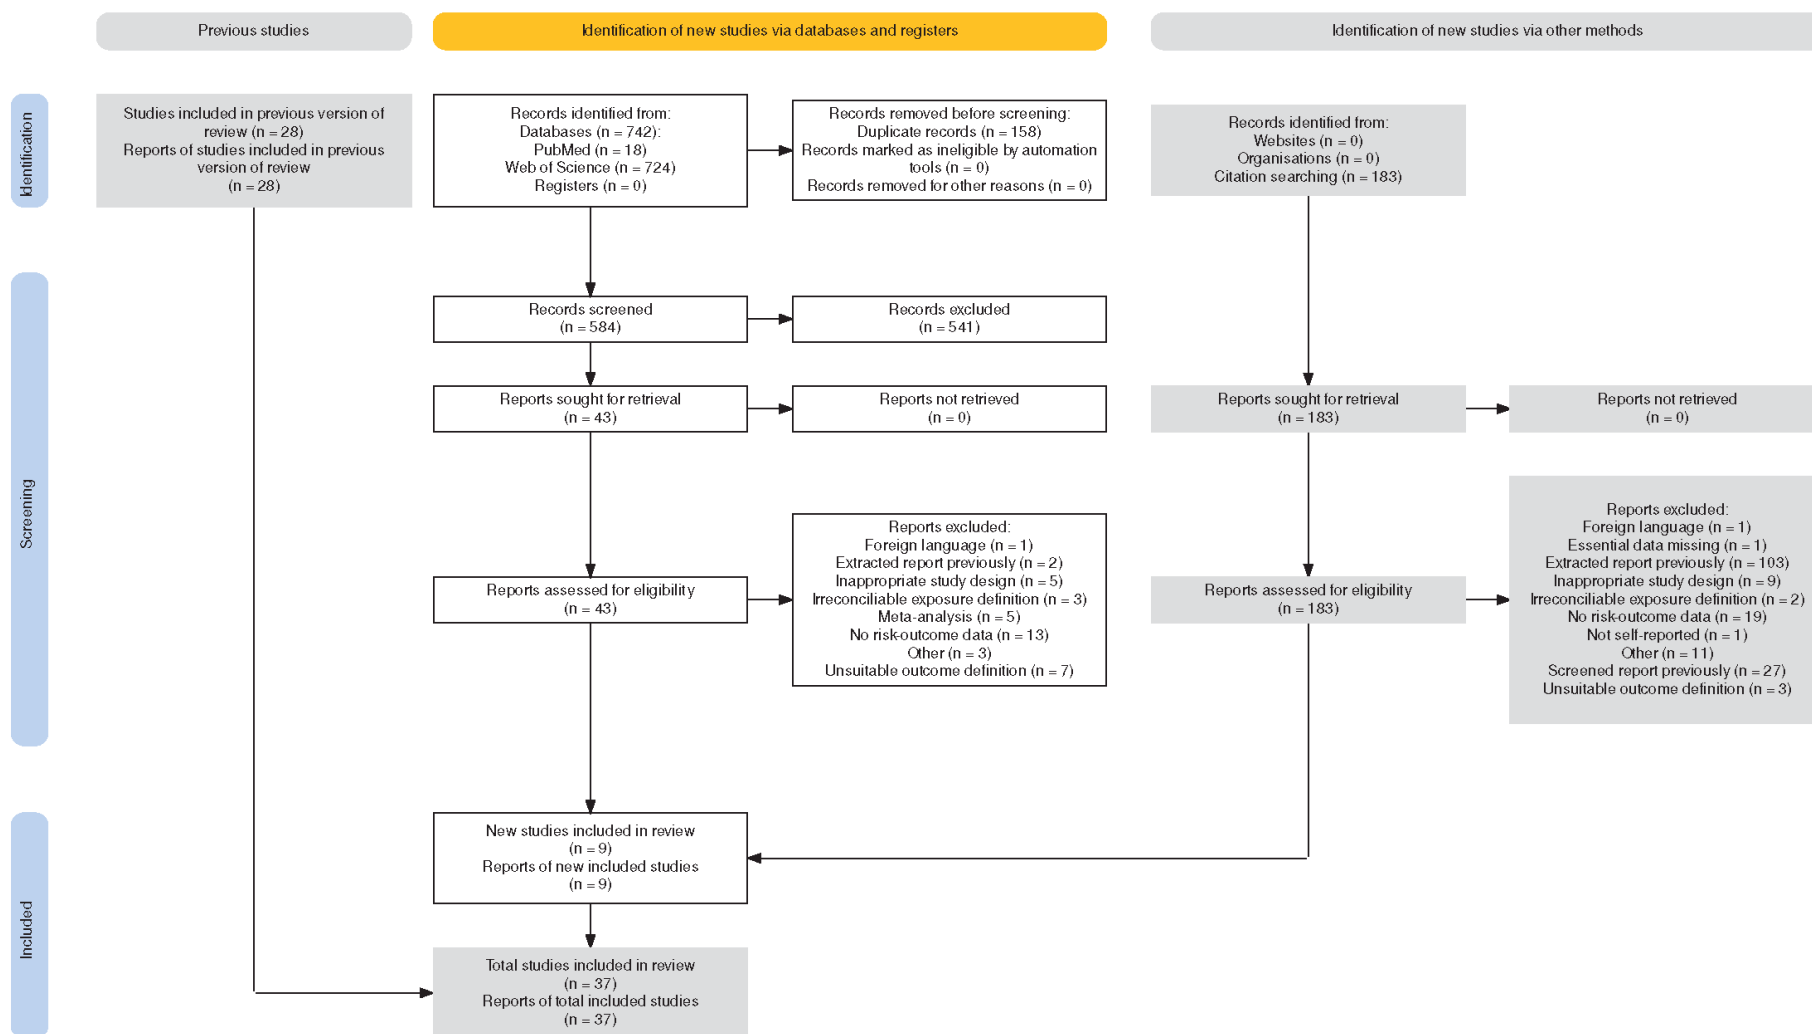

**Figure S2: PRISMA 2020 flow diagram for secondhand smoke and stroke**

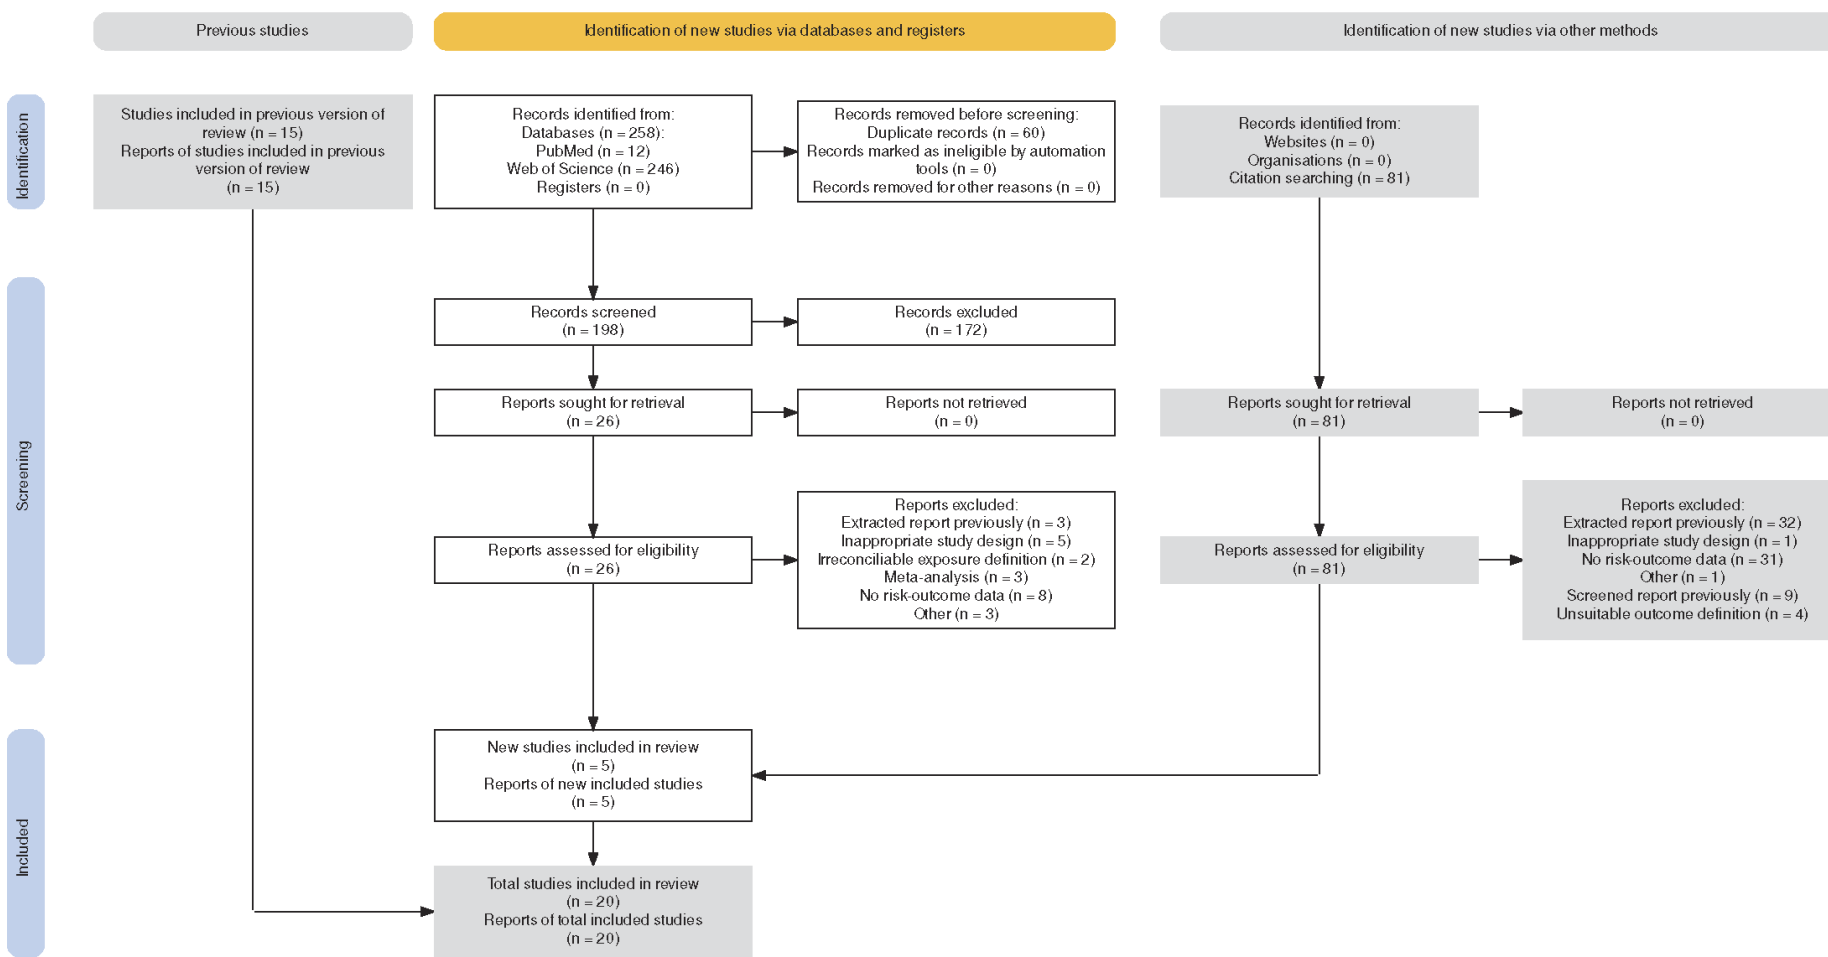

**Figure S3: PRISMA 2020 flow diagram for secondhand smoke and tracheal, bronchus, and lung cancer**

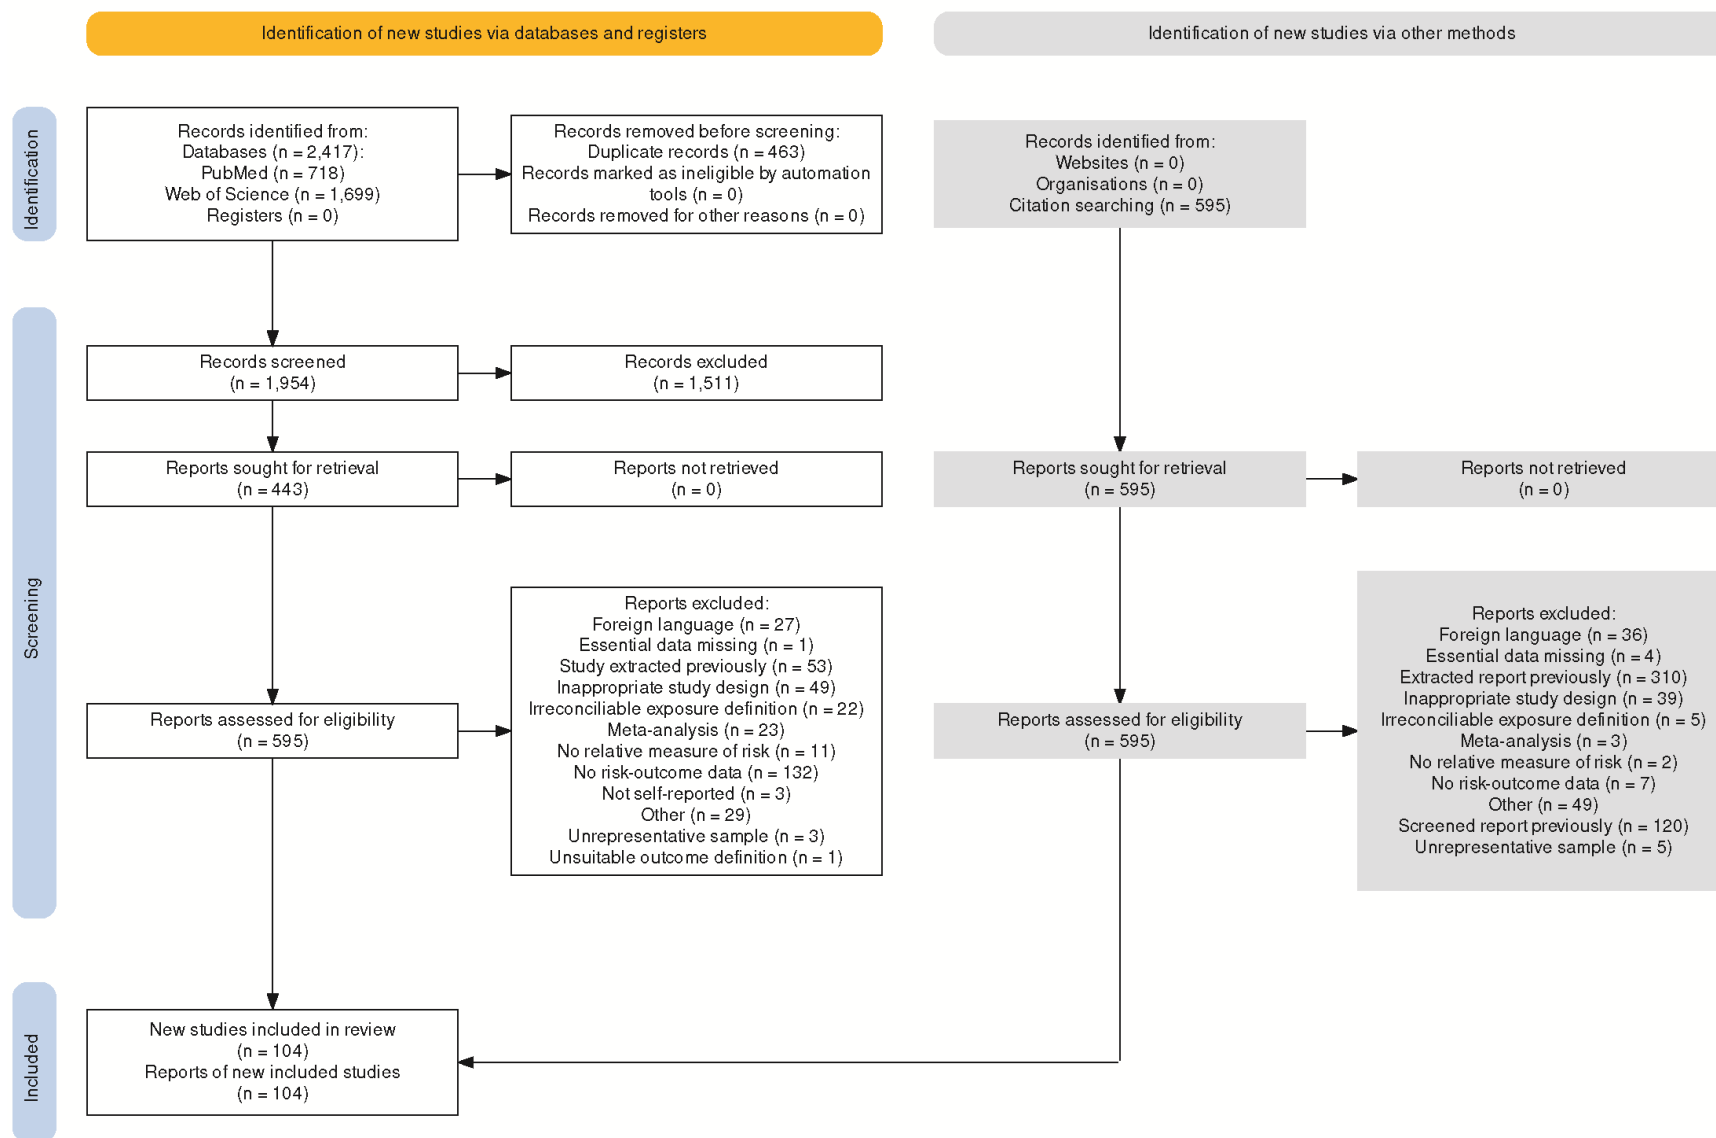

**Figure S4: PRISMA 2020 flow diagram for secondhand smoke and breast cancer**

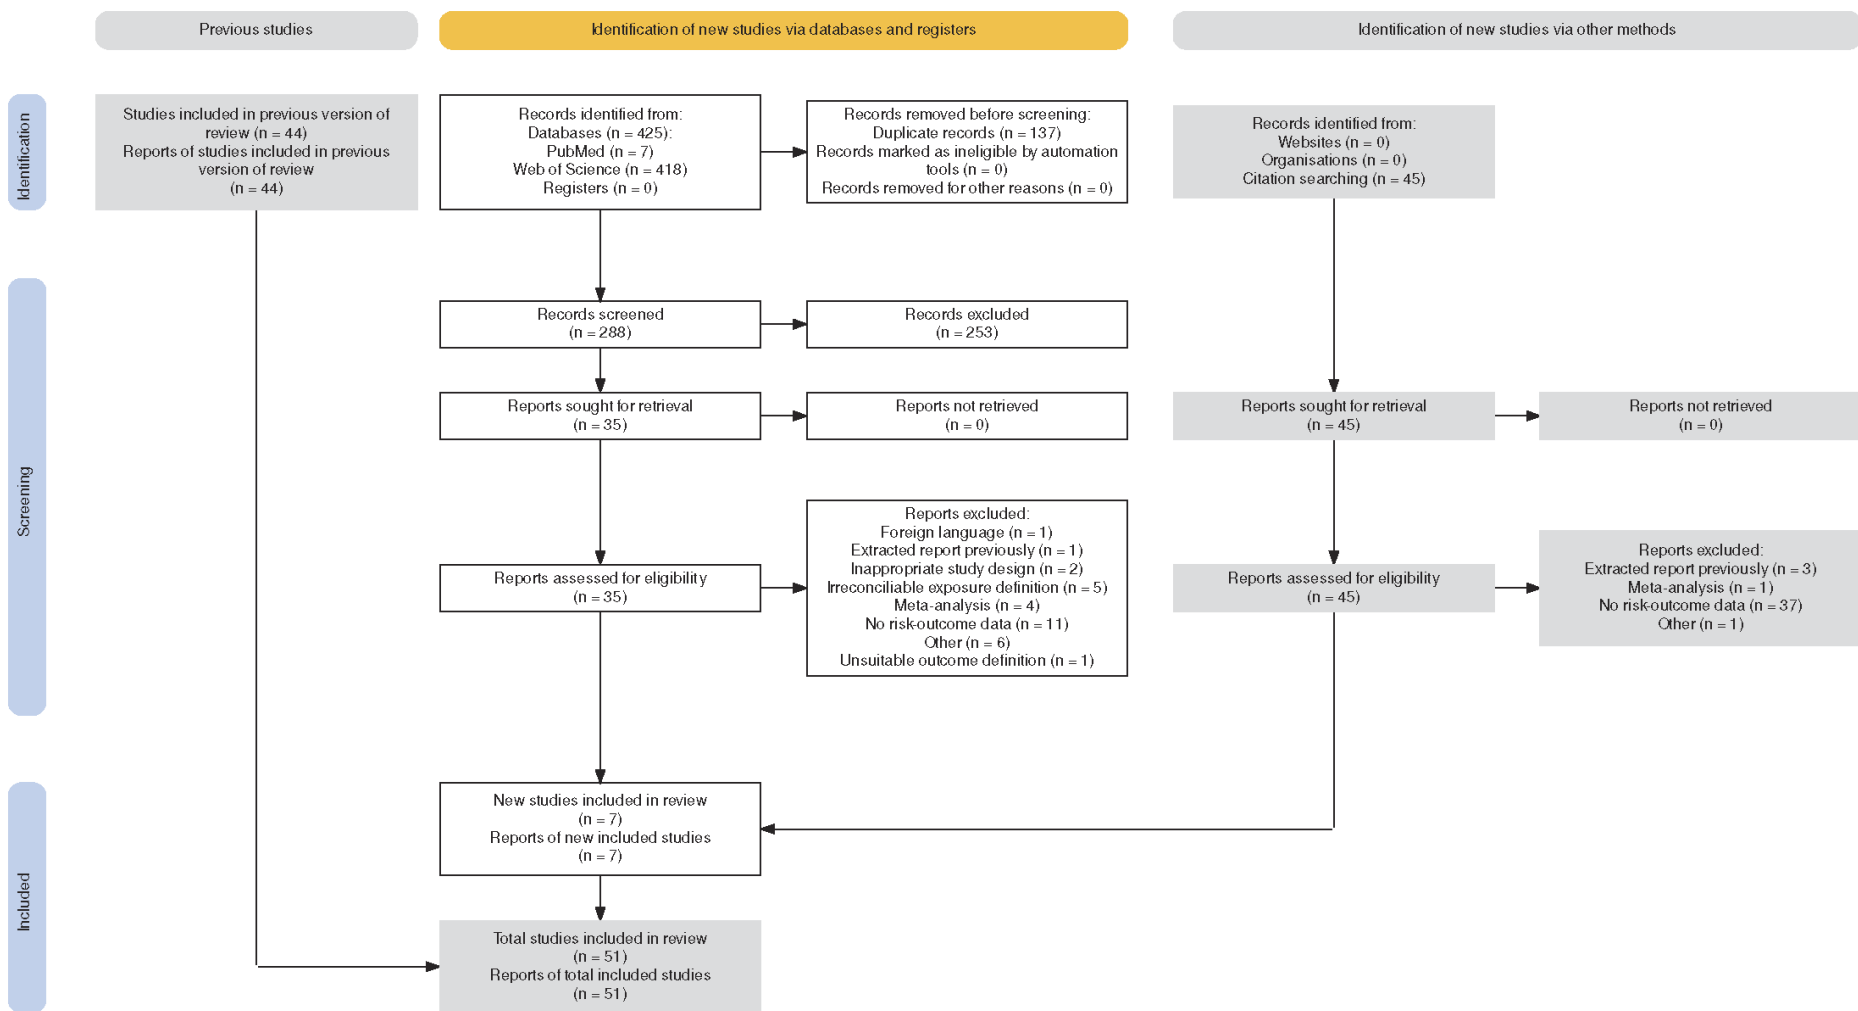

**Figure S5: PRISMA 2020 flow diagram for secondhand smoke and asthma**

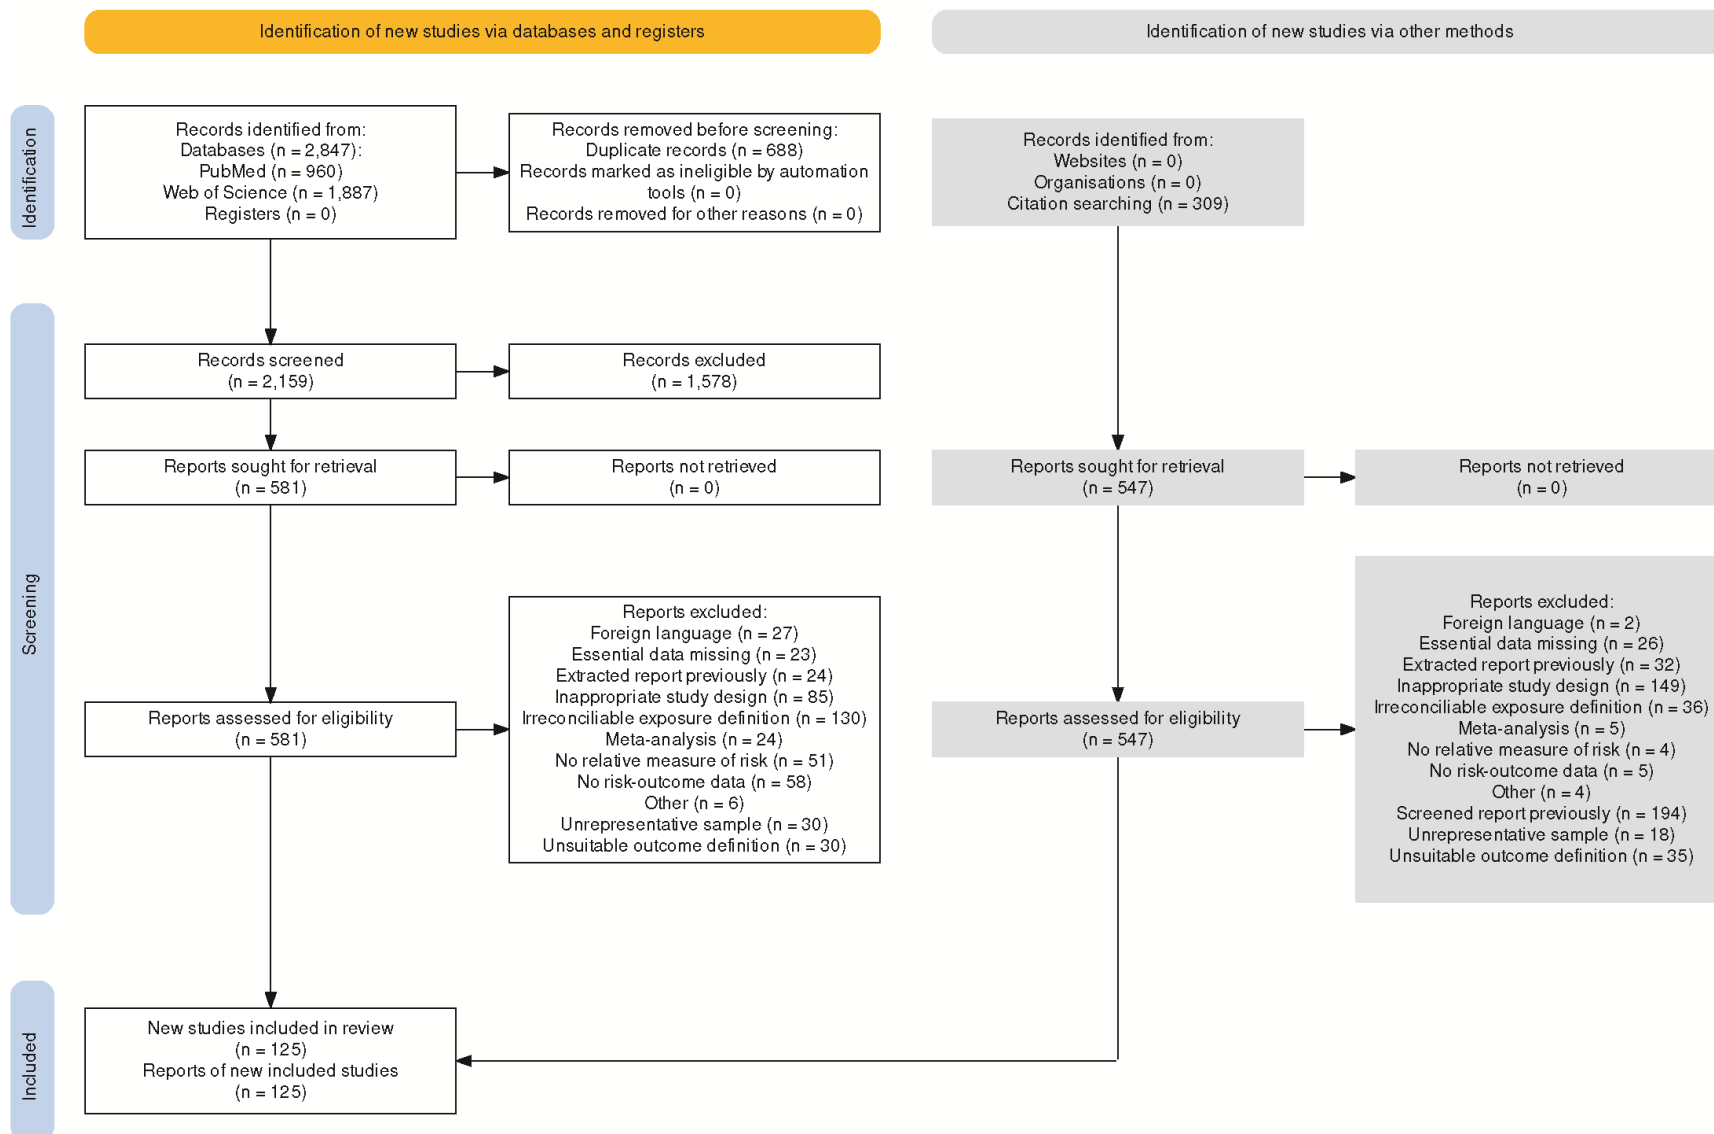

**Figure S6: PRISMA 2020 flow diagram for secondhand smoke and lower respiratory infections**

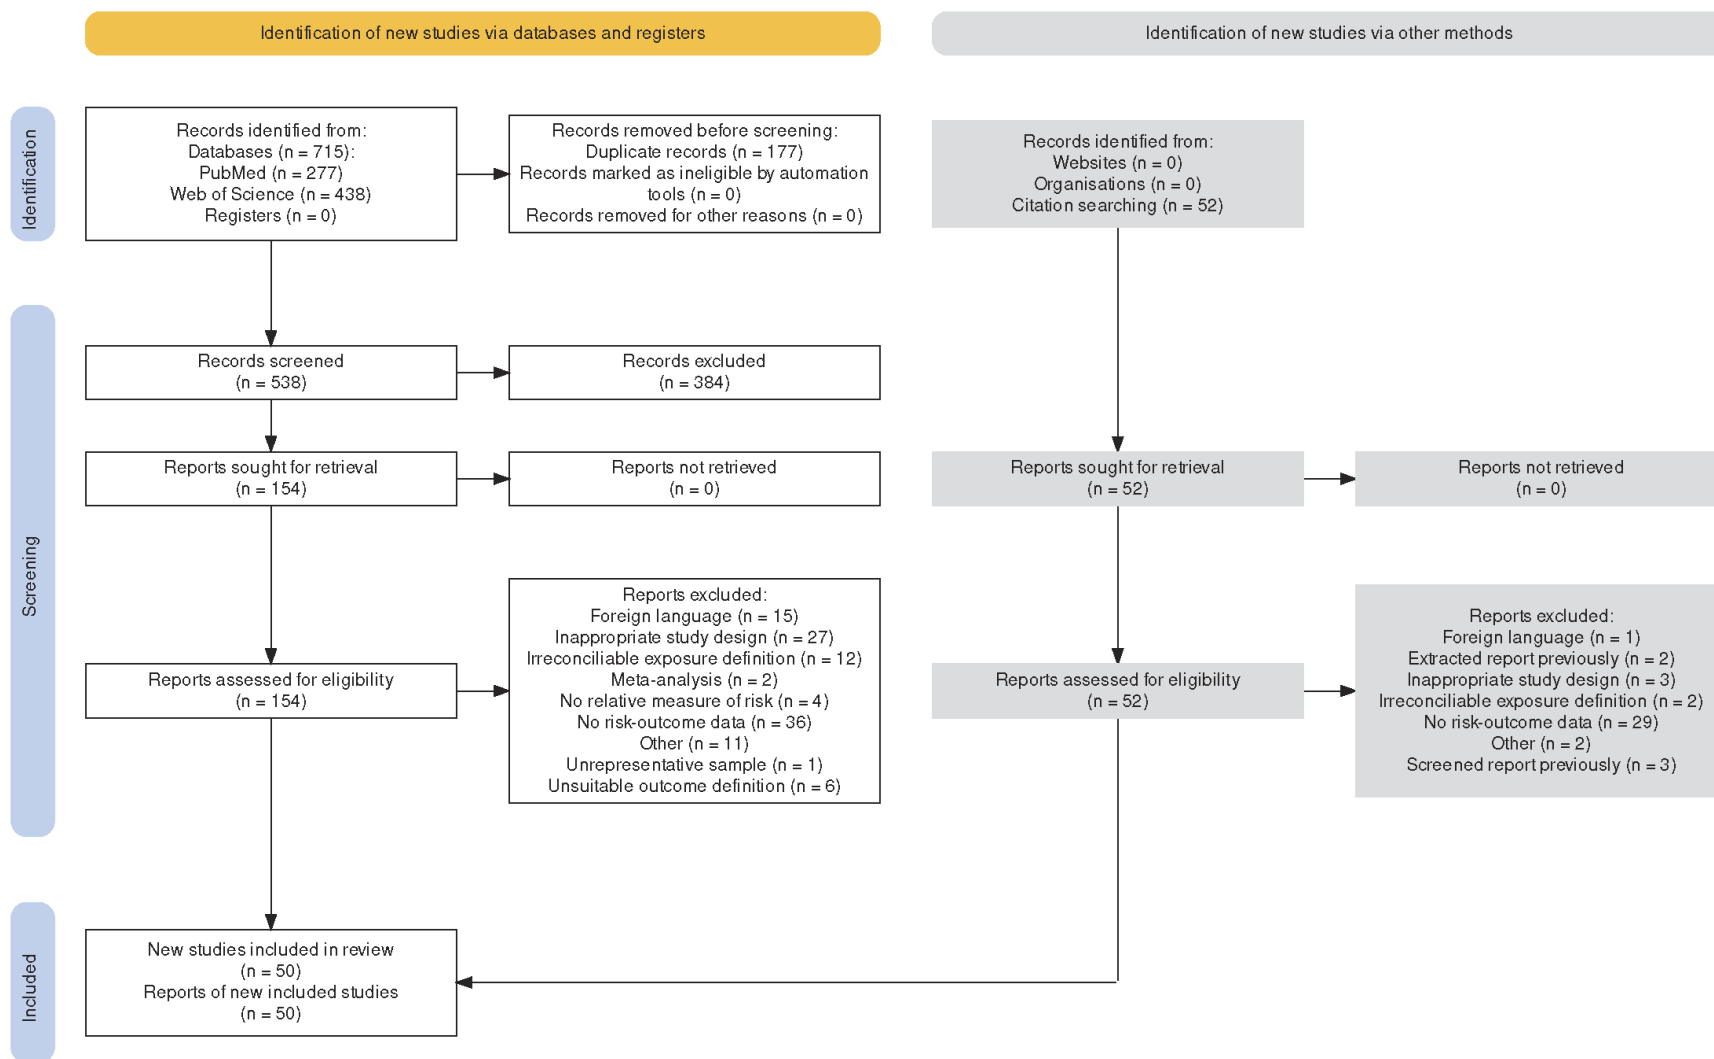



Figure S7: PRISMA 2020 flow diagram for secondhand smoke and chronic obstructive pulmonary disease

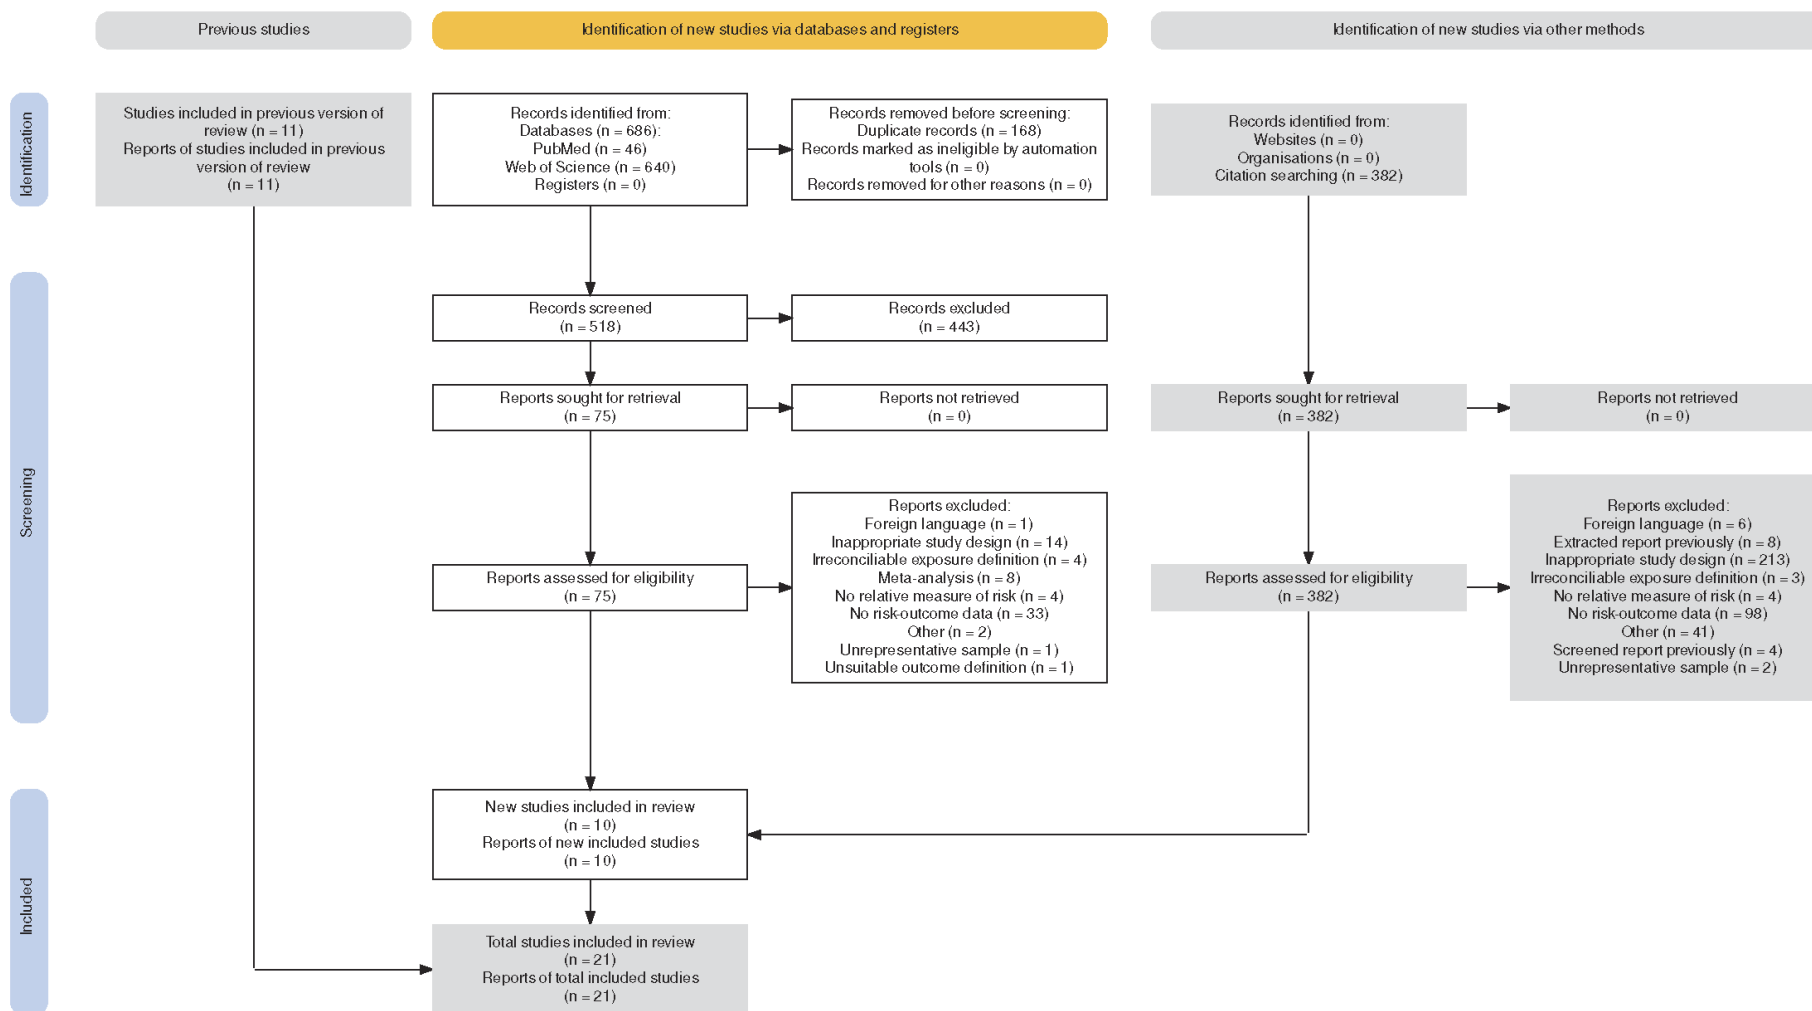

**Figure S8: PRISMA 2020 flow diagram for secondhand smoke and type 2 diabetes mellitus**

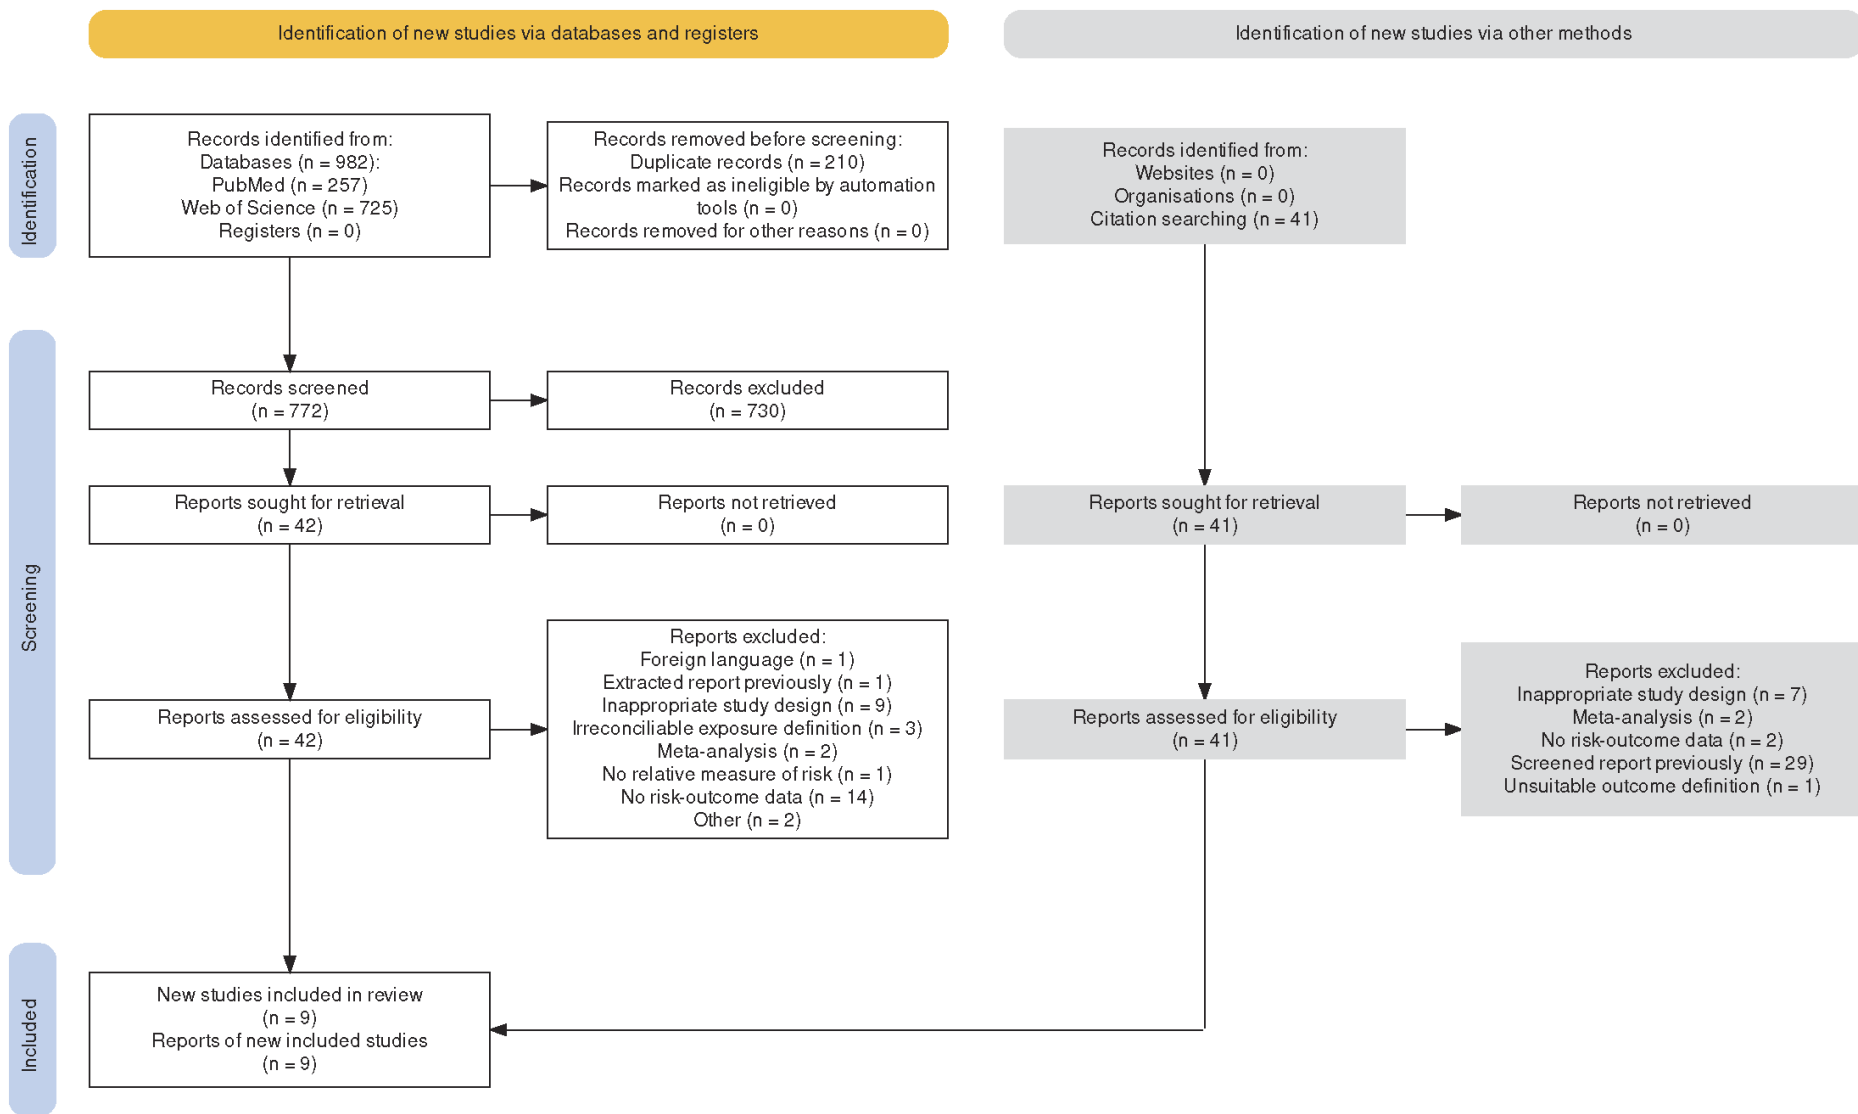

**Figure S9: PRISMA 2020 flow diagram for secondhand smoke and otitis media**

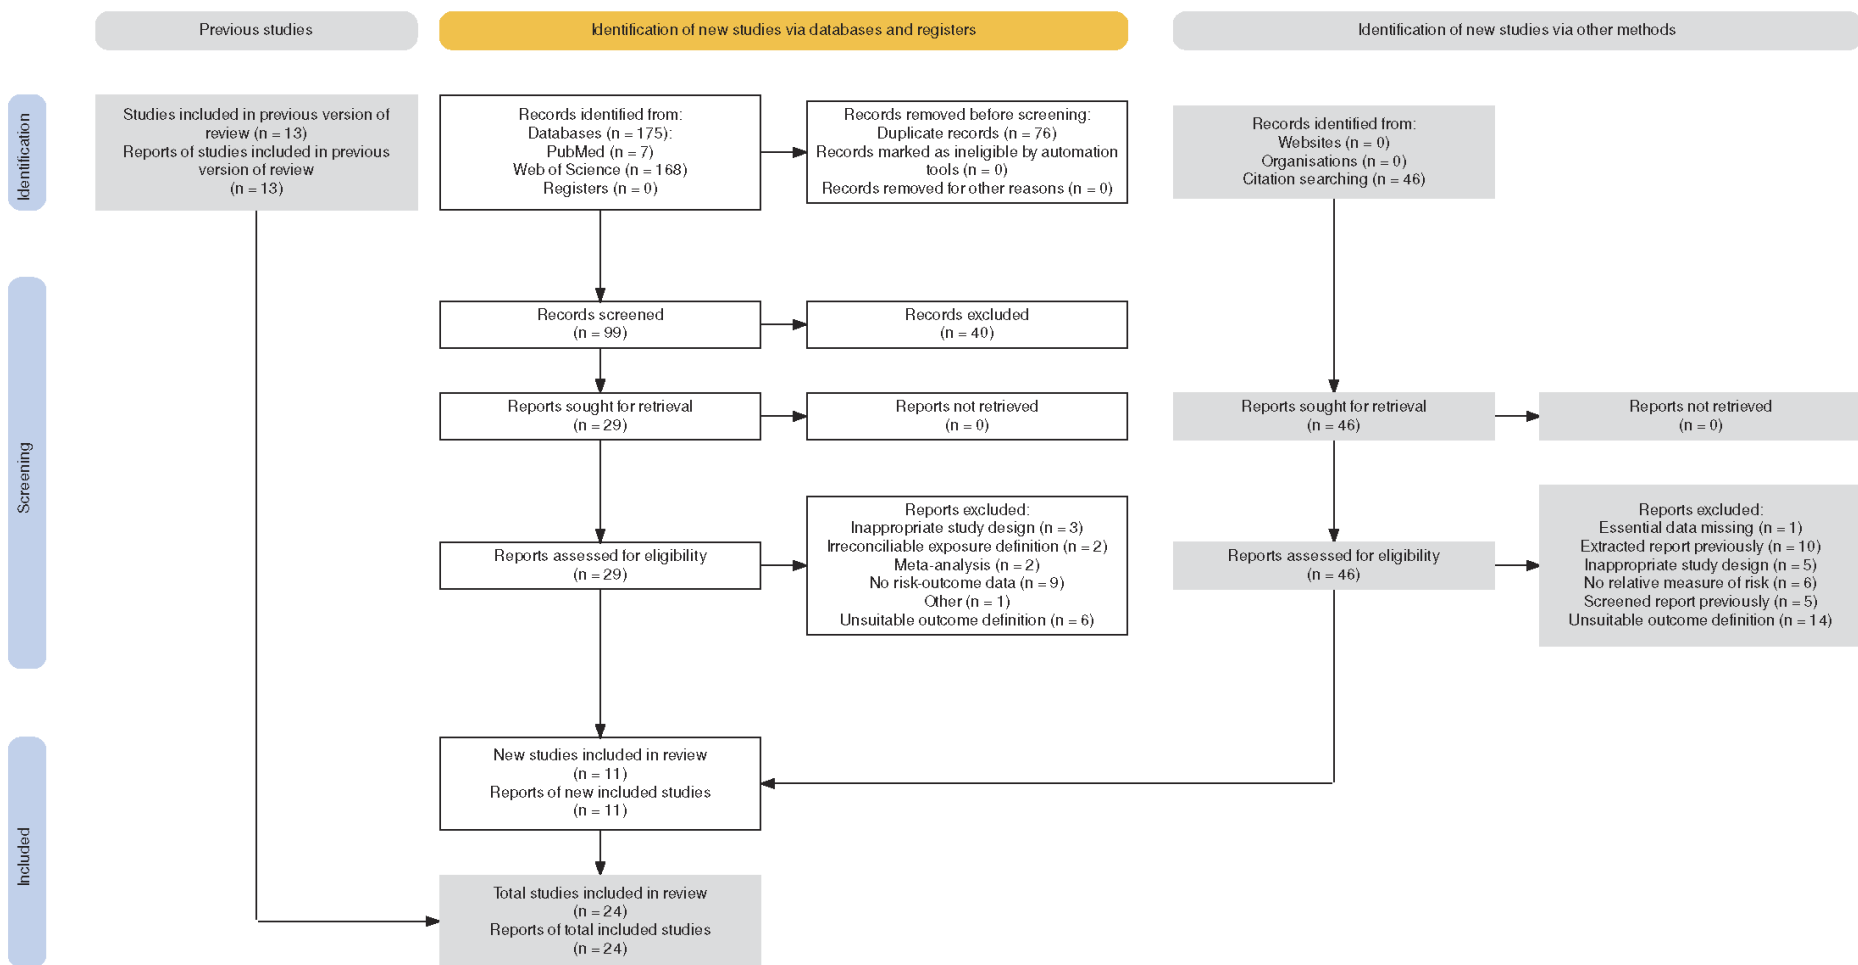

## Section 1.5: Data extraction

The extracted variables are described in the template below.

| <b>Table S2. Data Extraction Template</b> |                               |               |                                                                                                                                                                                                                                                                                                                                                                                                                                                                                                                                                                                                                                                                                                                                                                                      |
|-------------------------------------------|-------------------------------|---------------|--------------------------------------------------------------------------------------------------------------------------------------------------------------------------------------------------------------------------------------------------------------------------------------------------------------------------------------------------------------------------------------------------------------------------------------------------------------------------------------------------------------------------------------------------------------------------------------------------------------------------------------------------------------------------------------------------------------------------------------------------------------------------------------|
| Category                                  | Extraction Field Name         | Field Type    | Definition                                                                                                                                                                                                                                                                                                                                                                                                                                                                                                                                                                                                                                                                                                                                                                           |
| Source                                    | extractor                     | Free text     | UW NetID of person completing extraction                                                                                                                                                                                                                                                                                                                                                                                                                                                                                                                                                                                                                                                                                                                                             |
|                                           | nid                           | Numerical     | Unique identifier for the data created for the Global Health Data Exchange (GHDx)                                                                                                                                                                                                                                                                                                                                                                                                                                                                                                                                                                                                                                                                                                    |
|                                           | underlying_nid                | Numerical     | NID that identifies the underlying data source; File NIDs will cause errors, only NIDs in the GHDx database are accepted.                                                                                                                                                                                                                                                                                                                                                                                                                                                                                                                                                                                                                                                            |
|                                           | field_citation_value          | Free text     | Citation of NID pulled from the GHDx                                                                                                                                                                                                                                                                                                                                                                                                                                                                                                                                                                                                                                                                                                                                                 |
|                                           | file_path                     | Free text     | Full file path for the article where it is stored internally in the GHDx database.                                                                                                                                                                                                                                                                                                                                                                                                                                                                                                                                                                                                                                                                                                   |
|                                           | source_type                   | Categorical   | The type of data collection used to evaluate the risk factor. <ul style="list-style-type: none"> <li>• For cohort studies which conduct data collection of the risk multiple times during follow-up, select 'Survey - longitudinal'.</li> <li>• For cohort studies which conduct data collection of the risk at baseline only and case-cohort studies, select 'Survey - cohort'.</li> <li>• For the family of case-control study designs, select 'Survey - other/unknown'.</li> <li>• If a study was originally cross-sectional, but the study design changed through analysis (e.g., ran a case-control study based on the data from a cross-sectional survey or conducted outcome follow-up of cross-sectional survey participants), select 'Survey - cross-sectional'.</li> </ul> |
|                                           | Location & Representativeness | location_name | Categorical                                                                                                                                                                                                                                                                                                                                                                                                                                                                                                                                                                                                                                                                                                                                                                          |
| location_id                               |                               | Numerical     | Unique identifier for location based on GBD identifiers; autopopulated from location_name in extraction template                                                                                                                                                                                                                                                                                                                                                                                                                                                                                                                                                                                                                                                                     |
| rep_geography                             |                               | Binary        | Does the geographic coverage of the study match or nearly match that of the GBD geography? 1=yes, 0=no                                                                                                                                                                                                                                                                                                                                                                                                                                                                                                                                                                                                                                                                               |
| rep_population                            |                               | Binary        | Indicate whether the target population of the study is more broadly representative of the population at the study geography. 1=yes, 0=no                                                                                                                                                                                                                                                                                                                                                                                                                                                                                                                                                                                                                                             |
| site_memo                                 |                               | Free text     | Copy and paste verbatim from the source all the information regarding the location of data collection. Please include facility names (hospitals, clinics, etc.) and street addresses, GPS coordinates, etc., if provided.                                                                                                                                                                                                                                                                                                                                                                                                                                                                                                                                                            |
| rep_children                              |                               | Binary        | Indicate whether the target population of the study is comprised of mostly or only children. Individuals aged 15 years of age or older or considered adults.                                                                                                                                                                                                                                                                                                                                                                                                                                                                                                                                                                                                                         |
| rep_prevalent_disease                     |                               | Binary        | Is the study aiming to evaluate the risk or mortality of people who have already developed the outcome? 1=yes 0=no                                                                                                                                                                                                                                                                                                                                                                                                                                                                                                                                                                                                                                                                   |

**Table S2. Data Extraction Template**

| Category         | Extraction Field Name | Field Type  | Definition                                                                                                                                                                 |
|------------------|-----------------------|-------------|----------------------------------------------------------------------------------------------------------------------------------------------------------------------------|
| Study Population | year_start            | Numerical   | Year the study was started.                                                                                                                                                |
|                  | year_end              | Numerical   | Year the study was finished (including most recent follow up).                                                                                                             |
|                  | year_issue            | Binary      | Flag for any issues with study year that are identified during extraction; 1 = issue flagged for modeler; 0 = no issue flagged.                                            |
|                  | age_start             | Numerical   | Low end of range of ages in study sample used for the effect size.                                                                                                         |
|                  | age_end               | Numerical   | High end of range of ages in study sample used for the effect size.                                                                                                        |
|                  | age_mean              | Numerical   | Mean of ages in study sample used for the effect size.                                                                                                                     |
|                  | age_sd                | Numerical   | Standard deviation of ages represented in study sample used for the effect size.                                                                                           |
|                  | age_issue             | Binary      | 1 = issue flagged for modeler; 0 = no issue flagged                                                                                                                        |
|                  | age_demographer       | Binary      | 1 = person has had their "age" birthday and not yet their "age+1" birthday; 0 = exact age is used by the study. This field only applies to the value in the age_end field. |
|                  | sex                   | Categorical | Sex identifier: Male, Female, Both                                                                                                                                         |
| Study Design     | percent_male          | Numerical   | Percentage of the study sample that is male (decimal from 0-1)                                                                                                             |
|                  | sex_issue             | Binary      | Issues with sex identified during extraction; 0 = no issue flagged; 1 = issue flagged for modeler                                                                          |
|                  | design                | Categorical | Specifies the design of the study.                                                                                                                                         |
|                  | study_name            | Free Text   | The name of the study (e.g., Nurses' Health Study), if provided                                                                                                            |
| Risk             | occupational_study    | Binary      | Indicate whether a study analyzes risks of an outcome within certain occupations. 1 = if a study analyzes risks within occupations 0 = otherwise                           |
|                  | occupational_desc     | Free text   | If the study is occupational, list the occupations that are assessed for the risk of developing an outcome.                                                                |
|                  | risk                  | Categorical | Risk factor selected from a dropdown menu. It should always be "Secondhand smoke".                                                                                         |
| Exposure         | rei                   | Categorical | The human and machine-readable name associated with the risk factor in the GBD.                                                                                            |
|                  | risk_def              | Free text   | Provide a brief description of the risk as reported in the study.                                                                                                          |
|                  | risk_mapping          | Categorical | Select the scope of the study definition of the risk in relation to the GBD definition of the risk for a particular effect size.                                           |
|                  | exp_assess_level      | Categorical | Level at which the exposure was assessed.                                                                                                                                  |
|                  | exp_instrument        | Free text   | Specifies the name of the exposure assessment instrument. Unless a specifically-named instrument is reported, leave blank for secondhand smoke.                            |
|                  | exp_assess_period     | Categorical | Frequency of exposure assessment                                                                                                                                           |
|                  | exp_assess_num        | Numerical   | If multiple exposure assessments, specify the number of times that exposure was assessed (excluding baseline).                                                             |
| Exposure         | exp_method_1          | Categorical | Specifies the method of exposure assessment.                                                                                                                               |
|                  | exp_method_2          | Categorical | Specifies the secondary method of exposure assessment if there are 2 or more.                                                                                              |
|                  | exp_method_3          | Categorical | Specifies the tertiary method of exposure assessment if there are more than 2.                                                                                             |

**Table S2. Data Extraction Template**

| Category                   | Extraction Field Name   | Field Type  | Definition                                                                                                                                                                                                                                                                               |
|----------------------------|-------------------------|-------------|------------------------------------------------------------------------------------------------------------------------------------------------------------------------------------------------------------------------------------------------------------------------------------------|
|                            | exp_recall_period       | Categorical | The unit of exposure recall used in data collection for self-reported studies. Examples are “days,” “weeks,” “months,” “years,” or “point.” If a source does not specify or indicate a recall (explicitly or implicitly), assume that the recall is a point estimate and select ‘Point’. |
|                            | exp_recall_period_value | Numerical   | The corresponding integer with “exp_recall_period.” For example, if the study said the recall period was 4 weeks, enter 4 in exp_recall_period_value, and ‘weeks’ in the field exp_recall_period.                                                                                        |
|                            | exp_recall_period_other | Free text   | If ‘other’ was selected in exp_recall_period, describe the exposure recall period that the study specified (e.g., recall of exposure from 12 to 18 years).                                                                                                                               |
|                            | exp_type                | Categorical | Which form of the exposure was included in relative risk estimation analysis?                                                                                                                                                                                                            |
| Outcome                    | outcome                 | Categorical | Outcome of interest selected from a drop-down menu.                                                                                                                                                                                                                                      |
|                            | acause                  | Categorical | The machine-readable name for causes associated with the outcome in the GBD.                                                                                                                                                                                                             |
|                            | outcome_components      | Free text   | Denotes the subtype of the outcome, if applicable. If a study is assessing chronic suppurative otitis media, enter this subtype in this column.                                                                                                                                          |
|                            | outcome_def             | Free text   | Brief description of the outcome definition as reported in the study.                                                                                                                                                                                                                    |
|                            | asthma_outcome_type     | Categorical | Specify the asthma outcome described in the study and applied to the associated effect size. Value is one of ‘Asthma only’, ‘Asthma and wheezing’, or ‘Wheezing only’.                                                                                                                   |
|                            | asthma_recall           | Categorical | Specify the time period of recall when the outcome was determined. Value is one of ‘Past 12 months’, ‘Ever’, ‘Other’, or ‘Unspecified’.                                                                                                                                                  |
|                            | outcome_type            | Categorical | Field to specify if outcome definition incidence of or mortality from a disease endpoint                                                                                                                                                                                                 |
|                            | outcome_assess_1        | Categorical | Method of outcome assessment: Specifies the method of assessment of the study outcome. If more than 1 are appropriate, enter additional methods in the next column labeled outcome_assess_2.                                                                                             |
|                            | outcome_assess_2        | Categorical | Method of outcome assessment: Specifies a method of assessment of the study outcome. If more than 2 are appropriate, enter additional methods in the next column labeled outcome_assess_3.                                                                                               |
|                            | outcome_assess_3        | Categorical | Method of outcome assessment: Specifies a method of assessment of the study outcome.                                                                                                                                                                                                     |
| Follow up                  | duration_fup_measure    | Categorical | Type of follow up measure (i.e., mean, median, max, min).                                                                                                                                                                                                                                |
|                            | duration_fup_units      | Categorical | Units of follow up duration                                                                                                                                                                                                                                                              |
|                            | value_of_duration_fup   | Numerical   | The length of participant follow-up.                                                                                                                                                                                                                                                     |
| Confounders Controlled For | confounders_age         | Binary      | 1 = the study controls for age in the relative risk estimation analysis; 0= age is not controlled for                                                                                                                                                                                    |
|                            | confounders_sex         | Binary      | 1 = the study controls for sex in the relative risk estimation analysis; 0 = sex is not controlled for                                                                                                                                                                                   |
|                            | confounders_education   | Binary      | 1 = the study controls for education in the relative risk estimation analysis; 0 = education is not controlled for                                                                                                                                                                       |
|                            | confounders_income      | Binary      | 1 = the study controls for income in the relative risk estimation analysis; 0 = income is not controlled for                                                                                                                                                                             |

**Table S2. Data Extraction Template**

| Category                   | Extraction Field Name            | Field Type  | Definition                                                                                                                                              |
|----------------------------|----------------------------------|-------------|---------------------------------------------------------------------------------------------------------------------------------------------------------|
|                            | confounders_smoking              | Binary      | 1 = the study controls for smoking in the relative risk estimation analysis; 0 = smoking is not controlled for                                          |
|                            | confounders_alcohol_use          | Binary      | 1 = the study controls for alcohol in the relative risk estimation analysis; 0 = alcohol is not controlled for                                          |
|                            | confounders_physical_activity    | Binary      | 1 = the study controls for physical activity in the relative risk estimation analysis; 0 = physical activity is not controlled for                      |
|                            | confounders_dietary_components   | Binary      | 1 = the study controls for dietary components in the relative risk estimation analysis; 0 = dietary components are not controlled for                   |
|                            | confounders_bmi                  | Binary      | 1 = the study controls for BMI in the relative risk estimation analysis; 0 = BMI is not controlled for                                                  |
|                            | confounders_hypertension         | Binary      | 1 = the study controls for hypertension in the relative risk estimation analysis; 0 = hypertension is not controlled for                                |
|                            | confounders_diabetes             | Binary      | 1 = the study controls for diabetes in the relative risk estimation analysis; 0 = diabetes is not controlled for                                        |
|                            | confounders_hypercholesterolemia | Binary      | 1 = the study controls for hypercholesterolemia in the relative risk estimation analysis; 0 = hypercholesterolemia is not controlled for                |
|                            | confounders_marital_status       | Binary      | 1 = the study controls for marital status in the relative risk estimation analysis; 0 = marital status is not controlled for                            |
|                            | confounders_race_ethnicity       | Binary      | 1 = the study controls for race/ethnicity in the relative risk estimation analysis; 0 = race/ethnicity are not controlled for                           |
|                            | confounders_other                | Free Text   | List other confounders that not listed but that the effect size is controlled for.                                                                      |
| Model flagging             | most_adj_model                   | Binary      | 1 = the model controls for the most confounders and is the most adjusted for model; 0 = The model is not the most adjusted for model                    |
|                            | least_adj_model                  | Binary      | 1 = the model controls for the most confounders and is the most adjusted for model; 0 = The model is not the most adjusted for model                    |
| Exposure level definitions | exp_level_lower_sign             | Categorical | Select from the drop-down list a mathematical sign to accompany the numerical lower bound of the categorical range of exposure of the exposed subjects. |
|                            | exp_level_lower                  | Numerical   | The relevant numerical lower bound of the categorical range of exposure of the exposed subjects                                                         |
|                            | exp_level_upper_sign             | Categorical | A mathematical sign to accompany the numerical upper bound of the categorical range of exposure                                                         |
|                            | exp_level_upper                  | Numerical   | The relevant numerical upper bound of the categorical range of exposure of the exposed subjects                                                         |
|                            | unexp_level_lower_sign           | Categorical | A mathematical sign to accompany the numerical lower bound of the categorical range of exposure of the unexposed subjects                               |
|                            | unexp_level_lower                | Numerical   | The relevant numerical lower bound of the categorical range of exposure of the unexposed subjects                                                       |
|                            | unexp_level_upper_sign           | Categorical | A mathematical sign to accompany the lower or upper bound of categorical exposure for the unexposed subjects                                            |

**Table S2. Data Extraction Template**

| Category                  | Extraction Field Name  | Field Type  | Definition                                                                                                                                                                                                                                                                                                                                                                                                                                                                                                                                                                                                                                                                                                                                                                                                                                                                                                                                                              |
|---------------------------|------------------------|-------------|-------------------------------------------------------------------------------------------------------------------------------------------------------------------------------------------------------------------------------------------------------------------------------------------------------------------------------------------------------------------------------------------------------------------------------------------------------------------------------------------------------------------------------------------------------------------------------------------------------------------------------------------------------------------------------------------------------------------------------------------------------------------------------------------------------------------------------------------------------------------------------------------------------------------------------------------------------------------------|
|                           | unexp_level_upper      | Numerical   | Enter the relevant numerical lower bound of a categorical range of exposure of the unexposed subjects                                                                                                                                                                                                                                                                                                                                                                                                                                                                                                                                                                                                                                                                                                                                                                                                                                                                   |
| Effect size location      | page_num               | Free text   | Page number (where you found effect size) from literature, or survey question where you found effect size.                                                                                                                                                                                                                                                                                                                                                                                                                                                                                                                                                                                                                                                                                                                                                                                                                                                              |
|                           | table_num              | Free text   | Table number where you find relevant effect sizes.                                                                                                                                                                                                                                                                                                                                                                                                                                                                                                                                                                                                                                                                                                                                                                                                                                                                                                                      |
|                           | in_supplement          | Binary      | Were the relevant effect sizes found in the supplemental section? 1 = yes, 0 = no                                                                                                                                                                                                                                                                                                                                                                                                                                                                                                                                                                                                                                                                                                                                                                                                                                                                                       |
| Effect Size & Uncertainty | measure                | Categorical | The type of effect size being extracted                                                                                                                                                                                                                                                                                                                                                                                                                                                                                                                                                                                                                                                                                                                                                                                                                                                                                                                                 |
|                           | effect_size_unit       | Categorical | Mathematical space of the effect size. <ul style="list-style-type: none"> <li>'linear': Select this if the extracted effect size is in linear mathematical space. Effect sizes are most often reported in this form. For example, if the reported hazard ratio of exposure to secondhand smoke and developing lung cancer is 1.5, this value is in linear space.</li> <li>'logit': Select this if the extracted effect size is in logit mathematical space. This will most likely occur if the model coefficient of a logistic regression is extracted, which is the model associated with case-control studies and produces odds ratios.</li> <li>'log': Select this if the extracted effect size is in logarithmic mathematical space. This will most likely occur if the model coefficient of various statistical models (other than logistic regression) is extracted. Generally, relative risks and hazard ratios not in linear space are in log space.</li> </ul> |
|                           | effect_size_measure    | Categorical | Specify the estimate type of the effect size                                                                                                                                                                                                                                                                                                                                                                                                                                                                                                                                                                                                                                                                                                                                                                                                                                                                                                                            |
|                           | mean                   | Numerical   | The effect size estimate                                                                                                                                                                                                                                                                                                                                                                                                                                                                                                                                                                                                                                                                                                                                                                                                                                                                                                                                                |
|                           | lower                  | Numerical   | Provide the lower limit of the confidence interval. Enter on a 'per 1' basis. (If the CI is reported as a percent, you must convert to a decimal.) These 3 fields must all be filled in if any of them are filled in: lower, upper, uncertainty_type_value.                                                                                                                                                                                                                                                                                                                                                                                                                                                                                                                                                                                                                                                                                                             |
|                           | upper                  | Numerical   | Provide the upper limit of the confidence interval. Enter on a 'per 1' basis. (If the CI is reported as a percent, you must convert to a decimal.) These 3 fields must all be filled in if any of them are filled in: lower, upper, uncertainty_type_value.                                                                                                                                                                                                                                                                                                                                                                                                                                                                                                                                                                                                                                                                                                             |
|                           | uncertainty_type_value | Numerical   | This field is required if lower and upper are entered. This column reports the confidence level of the confidence interval (e.g., 95, 90, 99). These 3 fields                                                                                                                                                                                                                                                                                                                                                                                                                                                                                                                                                                                                                                                                                                                                                                                                           |



**Table S2. Data Extraction Template**

| Category                     | Extraction Field Name              | Field Type  | Definition                                                                                                                                                                                                                                                                                                      |
|------------------------------|------------------------------------|-------------|-----------------------------------------------------------------------------------------------------------------------------------------------------------------------------------------------------------------------------------------------------------------------------------------------------------------|
|                              |                                    |             | must all be filled in if any of them are filled in: lower, upper, uncertainty_type_value.                                                                                                                                                                                                                       |
|                              | standard_error                     | Numerical   | Required if upper and lower uncertainty bounds are not extracted and standard error is reported.                                                                                                                                                                                                                |
|                              | uncertainty_issue                  | Binary      | Is a measure of uncertainty not reported? 1=yes, 0=no                                                                                                                                                                                                                                                           |
|                              | effect_size_derived                | Binary      | Was the effect size calculated (e.g., adjusted to linear space, calculated using an online tool)? 1=yes, no=0                                                                                                                                                                                                   |
|                              | effect_size_from_image             | Binary      | Was WebPlotDigitizer or another image processing tool used to extract the effect size? 1=yes, no=0                                                                                                                                                                                                              |
| Effect Size Analysis Details | subgroup_analysis                  | Binary      | Is the effect size from the main analysis (all participants)? (Examples of a sub-analysis include only males, among a specific age group, etc.) 1=yes, 0=no                                                                                                                                                     |
|                              | subgroup_analysis_free_text        | Free text   | If a sub-analysis, describe it (e.g., age, sex, etc.)                                                                                                                                                                                                                                                           |
|                              | effect_size_multi_location         | Binary      | Is the effect size from a multi-country study and only one effect size is reported for all locations? 1=yes, 0=no                                                                                                                                                                                               |
|                              | effect_size_multi_location_specify | Categorical | Which geography level is represented by the effect size?                                                                                                                                                                                                                                                        |
|                              | pooled_cohort                      | Binary      | Is the effect size from a pooled analysis and only a pooled effect size is reported? 1=yes, 0=no                                                                                                                                                                                                                |
|                              | dose_response                      | Binary      | Does the study support a dose-response relationship between the exposure and the outcome? 1=yes, 0=no                                                                                                                                                                                                           |
|                              | dose_response_detail               | Free text   | If '1' was specified in the dose_response field, please specify in this field the type of evidence supporting the dose-response relationship. For example, 'statistically significant p-value for linear trend'.                                                                                                |
| SHS-specific columns         | shs_exp_location                   | Categorical | Select from the drop-down list the location of SHS exposure, as defined in the survey for that row of extraction. <ul style="list-style-type: none"> <li>Values: 'home', 'home only', 'work', 'work only', 'home or work', 'home and work', 'public', 'multiple-or', 'multiple-and', 'other', 'any'.</li> </ul> |
|                              | shs_exp_location_desc              | Free text   | Enter a brief description of the location of SHS exposure, if either 'multiple' or 'other' were selected in the shs_exp_location column.<br>Example: If the exposure was SHS at either work or in public, enter 'work or public'. If the exposure was a combination of work and public, enter 'work and public' |
|                              | shs_exp_source                     | Categorical | Select from the drop-down list the source of SHS exposure. <ul style="list-style-type: none"> <li>If shs_exp_location is set to 'home', select one from among 'maternal', 'maternal only',</li> </ul>                                                                                                           |

**Table S2. Data Extraction Template**

| Category              | Extraction Field Name     | Field Type  | Definition                                                                                                                                                                                                                                                                                                                                                                                                                                                                                                                                                                                                                                                                          |
|-----------------------|---------------------------|-------------|-------------------------------------------------------------------------------------------------------------------------------------------------------------------------------------------------------------------------------------------------------------------------------------------------------------------------------------------------------------------------------------------------------------------------------------------------------------------------------------------------------------------------------------------------------------------------------------------------------------------------------------------------------------------------------------|
|                       | shs_exp_unit              | Free text   | <p>'paternal', 'paternal only', 'parental', 'parental-one', 'parental-both', 'spouse', 'other family (not spouse)', or 'family (anyone in household)'.</p> <ul style="list-style-type: none"> <li>If shs_exp_location is set to a value other than 'home', select 'any' only.</li> </ul> <p>Enter the unit of categorical or continuous exposure related to the values filled out in the exposure level columns as reported in the paper for exposed subjects.</p> <ul style="list-style-type: none"> <li>'binary': Exposure is dichotomous, i.e., yes or no</li> <li>'cigs/day': Exposure is recorded as equivalents to cigarettes/day smoked by the source of exposure</li> </ul> |
|                       | shs_exp_temporality       | Categorical | <p>Select from the drop-down list the temporality of SHS exposure for the exposed subjects. That is, denote exposed subjects' SHS exposure as current, former, etc.</p> <ul style="list-style-type: none"> <li>Values: 'former', 'current', 'never', 'ever', 'adulthood', 'childhood'.</li> </ul> <p>Example: If SHS exposure is from a former smoking spouse, select 'former'.</p>                                                                                                                                                                                                                                                                                                 |
|                       | shs_exp_smoking_status    | Categorical | <p>Select from the drop-down list the smoking status of the exposed subjects.</p> <ul style="list-style-type: none"> <li>Values: 'former smokers', 'never smokers', 'non-smokers (former and never)', 'unknown', 'any smoking status'.</li> </ul>                                                                                                                                                                                                                                                                                                                                                                                                                                   |
|                       | shs_unexp_unit            | Free text   | <p>Enter the unit of categorical or continuous exposure related to the values filled out in the exposure level columns as reported in the paper for unexposed subjects.</p> <ul style="list-style-type: none"> <li>'binary': Exposure is dichotomous, i.e., yes or no</li> <li>'cigs/day': Exposure is recorded as equivalents to cigarettes/day smoked by the source of exposure</li> </ul>                                                                                                                                                                                                                                                                                        |
|                       | shs_unexp_temporality     | Categorical | <p>Select from the drop-down list the temporality of SHS exposure for the unexposed subjects. That is, denote unexposed subjects' SHS exposure as current, former, etc.</p> <ul style="list-style-type: none"> <li>Values: 'former', 'current', 'never', 'ever', 'adulthood', 'childhood'.</li> </ul> <p>Example: If SHS exposure is from a former smoking spouse, select 'former'.</p>                                                                                                                                                                                                                                                                                             |
|                       | shs_unexp_smoking_status  | Categorical | <p>Select from the drop-down list the smoking status of the unexposed subjects.</p> <ul style="list-style-type: none"> <li>Values: 'former smokers', 'never smokers', 'non-smokers (former and never)', 'unknown', 'any smoking status'.</li> </ul>                                                                                                                                                                                                                                                                                                                                                                                                                                 |
| Cohort Sample Details | cohort_person_years_exp   | Numerical   | Please specify the person years of follow up in the exposed group                                                                                                                                                                                                                                                                                                                                                                                                                                                                                                                                                                                                                   |
|                       | cohort_person_years_unexp | Numerical   | Please specify the person years of follow up in the unexposed group                                                                                                                                                                                                                                                                                                                                                                                                                                                                                                                                                                                                                 |

**Table S2. Data Extraction Template**

| Category                    | Extraction Field Name      | Field Type | Definition                                                                                                                                                                   |
|-----------------------------|----------------------------|------------|------------------------------------------------------------------------------------------------------------------------------------------------------------------------------|
|                             | cohort_person_years_total  | Numerical  | Enter the total person-years of follow-up if person-years of follow up in exposed and unexposed not reported                                                                 |
|                             | cohort_number_events_exp   | Numerical  | The number of events in the exposed cohort group                                                                                                                             |
|                             | cohort_number_events_unexp | Numerical  | Please specify the number of events in the unexposed group                                                                                                                   |
|                             | cohort_number_events_total | Numerical  | Enter the total number of events/cases if number of events in exposed and unexposed not reported                                                                             |
|                             | cohort_sample_size_exp     | Numerical  | Please specify the number of people in the exposed group if person-years of follow up in exposed not reported                                                                |
|                             | cohort_sample_size_unexp   | Numerical  | Please specify the number of people in the unexposed group if person-years of follow up in unexposed not reported                                                            |
|                             | cohort_sample_size_total   | Numerical  | Please specify the number of people included in the analysis if total person-years of follow up in not reported                                                              |
|                             | cohort_dropout_rate        | Numerical  | Dropout rate : Specify the dropout rate (%) at the end of the study. Enter on a "per 1" basis. For example: 23% is entered as .23.                                           |
|                             | cohort_dropout_assess      | Free text  | Specify how dropout rate was defined in the study.                                                                                                                           |
|                             | cohort_exposed_def         | Free text  | Exposed group definition: Provide a brief description of the exposed group (i.e., the comparison group) as used in estimation of the relative risk                           |
|                             | cohort_exp_unit_rr         | Free text  | Exposure unit (for continuous risks): Specify the unit of exposure (e.g., grams/day).                                                                                        |
|                             | cohort_exp_level_rr        | Numerical  | Exposure level in the exposed group (for continuous risks): Specify the mean/median level of exposure in the exposed group.                                                  |
|                             | cohort_unexp_def           | Free text  | unexposed group definition: Provide a brief description of the unexposed group (i.e., the comparison group) as used in estimation of the relative risk (e.g., never smokers) |
|                             | cohort_unexp_unit_rr       | Free text  | Exposure unit (for continuous risks): Specify the unit of exposure (e.g., grams/day) for the unexposed group                                                                 |
|                             | cohort_unexp_level_rr      | Numerical  | Exposure level in the unexposed group (for continuous risks): Specify the mean/median level of exposure in the unexposed group.                                              |
|                             | cohort_exp_level_dr        | Free text  | Exposure level in for dose-repose RRs (for continuous risks): If the study reports dose-repose RR, please specify the level of exposure for the reported RR                  |
| Case-control Sample Details | cc_community               | Binary     | Were the controls selected from the community? 1 = yes, 0=no                                                                                                                 |
|                             | cc_cases_exp               | Numerical  | Number of exposed cases associated with the effect size                                                                                                                      |

**Table S2. Data Extraction Template**

| Category | Extraction Field Name | Field Type | Definition                                                                                                                                                   |
|----------|-----------------------|------------|--------------------------------------------------------------------------------------------------------------------------------------------------------------|
|          | cc_controls_exp       | Numerical  | Number of exposed controls associated with the effect size                                                                                                   |
|          | cc_cases_unexp        | Numerical  | Number of cases in the unexposed group associated with the effect size.                                                                                      |
|          | cc_controls_unexp     | Numerical  | Number of controls in the unexposed group associated with the effect size.                                                                                   |
|          | cc_cases_total        | Numerical  | Total number of cases associated with the effect size                                                                                                        |
|          | cc_controls_total     | Numerical  | Total number of controls associated with the effect size                                                                                                     |
|          | cc_dropout_rate       | Numerical  | The dropout rate of the study sample, including non-responsiveness                                                                                           |
|          | cc_dropout_assess     | Free text  | How the dropout rate was determined by the researchers                                                                                                       |
|          | cc_exposed_def        | Free text  | Exposed group definition: Provide a brief description of the exposed group for which the relative risk is reported                                           |
|          | cc_exp_unit_rr        | Free text  | For continuous risks, specify the unit of exposure used to define the exposed group.                                                                         |
|          | cc_exp_level_rr       | Numerical  | Exposure level in the exposed group (for continuous risks): Specify the mean/median level of exposure in the exposed group.                                  |
|          | cc_unexposed_def      | Free text  | Unexposed group definition: Provide a brief description of the unexposed group (i.e., the comparison group) as used in estimation of the relative risk       |
|          | cc_unexp_unit_rr      | Free text  | For continuous risks, specify the unit of exposure used to define the unexposed group                                                                        |
|          | cc_unexp_level_rr     | Numerical  | Exposure level in the unexposed group (for continuous risks): Specify the mean/median level of exposure in the unexposed group.                              |
|          | cc_exp_level_dr       | Free text  | Exposure level in for dose-repose RRs (for continuous risks): If the study reports dose-repose RR, please specify the level of exposure for the reported RR. |
| Misc.    | note_modeler          | Free text  | Any notes added by the modeler when reviewing the source.                                                                                                    |
|          | note_sr               | Free text. | Any notes related to the extraction, including assumptions, data adjustments, problems with the source, any other notes that may be relevant, etc.           |

## Section 2: Data Inputs

We extracted our data inputs from peer-reviewed studies identified through the systematic reviews. The data from studies included in our systematic reviews were extracted by one member of the research team using the extraction template described above (Section 1.5). At a minimum, the most and least adjusted relevant effect size and related uncertainty reported for each study exposure-outcome definition pairing and the analytical sample was extracted, along with the metadata for each effect size and the metadata for the study overall. Individual observations that did not match our inclusion criteria and matched our exclusion criteria were not extracted. In certain cases, where an effect size for an exact or preferred secondhand smoke definition was not reported but the number of exposed cases, unexposed cases, exposed controls, and unexposed controls were available, the extractor manually calculated the unadjusted effect size corresponding to the study design and its related uncertainty.

## Section 2.1: Study characteristics

**Table S3. Summary of study characteristics**

| Health outcome | Author-Year        | Study name                           | Study design       | Location     | Sex  | Age start | Age end | Exposure assessment | Outcome assessment                                                        | Endpoint  | Sample size | Exposed | Events | Follow-up (years) | Person-years | Cases | Controls | Control pool | Exposure location | Exposure source              | Smoking status     |
|----------------|--------------------|--------------------------------------|--------------------|--------------|------|-----------|---------|---------------------|---------------------------------------------------------------------------|-----------|-------------|---------|--------|-------------------|--------------|-------|----------|--------------|-------------------|------------------------------|--------------------|
| Asthma         | Al-Kubaisy 2005    | N/A                                  | Prospective cohort | Iraq         | Both | 6         | 12      | Self-report         | Self-report; Physician diagnosis                                          | Incidence | 2,262       | N/A     | N/A    | 0.75              | N/A          | 644   | 1,618    | Community    | Home              | Maternal; Paternal           | Unspecified        |
| Asthma         | Al-Qerem 2016      | N/A                                  | Prospective cohort | Egypt        | Both | 7         | 12      | Self-report         | Self-report                                                               | Incidence | 2,183       | N/A     | N/A    | 2                 | N/A          | N/A   | N/A      | N/A          | Home              | Family (anyone in household) | Never smokers      |
| Asthma         | Arif 2017          | N/A                                  | Case-control       | Sindh        | Both | 2         | 14      | Self-report         | Physician diagnosis                                                       | Morbidity | N/A         | N/A     | N/A    | N/A               | N/A          | 200   | 200      | Community    | Home              | Parental                     | Never smokers      |
| Asthma         | Aversa 2021        | Rochester Epidemiology Project (REP) | Prospective cohort | Minnesota    | Both | 0         | 0       | Self-report         | Administrative medical records or disease registries                      | Incidence | 14,572      | 1,608   | N/A    | 8.8               | N/A          | N/A   | N/A      | N/A          | Home              | Maternal                     | Never smokers      |
| Asthma         | Azizi 1995         | N/A                                  | Case-control       | Malaysia     | Both | 0.083     | 5       | Self-report         | Physician diagnosis; Administrative medical records or disease registries | Morbidity | N/A         | N/A     | N/A    | N/A               | N/A          | 158   | 201      | Hospital     | Home              | Family (anyone in household) | Never smokers      |
| Asthma         | Balemans 2006      | N/A                                  | Prospective cohort | Netherlands  | Both | 2         | 21      | Self-report         | Self-report                                                               | Incidence | N/A         | 693     | N/A    | 19                | N/A          | N/A   | N/A      | N/A          | Home              | Maternal                     | Any smoking status |
| Asthma         | Beijsterveldt 2008 | N/A                                  | Prospective cohort | Netherlands  | Both | 0.25      | 0.999   | Self-report         | Self-report                                                               | Incidence | 11,684      | N/A     | N/A    | 5                 | N/A          | N/A   | N/A      | N/A          | Home              | Paternal                     | Never smokers      |
| Asthma         | Bener 2007         | N/A                                  | Case-control       | Qatar        | Both | 6         | 13      | Self-report         | Self-report; Physician diagnosis                                          | Morbidity | N/A         | N/A     | N/A    | N/A               | N/A          | 716   | 716      | Community    | Home              | Paternal                     | Unspecified        |
| Asthma         | Bergmann 2000      | N/A                                  | Prospective cohort | Germany      | Both | 0         | 0       | Self-report         | Physician diagnosis; Self-report                                          | Incidence | 1,314       | N/A     | N/A    | 6                 | N/A          | N/A   | N/A      | N/A          | Home              | Family (anyone in household) | Never smokers      |
| Asthma         | Boker 2019         | N/A                                  | Case-control       | Saudi Arabia | Both | 2         | 14      | Self-report         | Physician diagnosis                                                       | Morbidity | N/A         | N/A     | N/A    | N/A               | N/A          | 257   | 252      | Hospital     | Home              | Parental                     | Never smokers      |
| Asthma         | Boneberger 2011    | N/A                                  | Case-control       | Chile        | Both | 6         | 15      | Self-report         | Physician diagnosis                                                       | Morbidity | N/A         | N/A     | N/A    | N/A               | N/A          | 188   | 294      | Hospital     | Home              | Family (anyone in household) | Never smokers      |

**Table S3. Summary of study characteristics**

| Health outcome | Author-Year    | Study name                                          | Study design        | Location                   | Sex    | Age start | Age end | Exposure assessment    | Outcome assessment               | Endpoint  | Sample size | Exposed | Events | Follow-up (years) | Person-years | Cases | Controls | Control pool | Exposure location | Exposure source                   | Smoking status                 |
|----------------|----------------|-----------------------------------------------------|---------------------|----------------------------|--------|-----------|---------|------------------------|----------------------------------|-----------|-------------|---------|--------|-------------------|--------------|-------|----------|--------------|-------------------|-----------------------------------|--------------------------------|
| Asthma         | Bozicevic 2000 | N/A                                                 | Case-control        | Croatia                    | Both   | 18        | 73      | Self-report            | Self-report                      | Morbidity | N/A         | N/A     | N/A    | N/A               | N/A          | 175   | 108      | Hospital     | Home; Work        | Family (anyone in household); Any | Any smoking status             |
| Asthma         | Butland 1997   | N/A                                                 | Case-control        | Greater London             | Both   | 7.5       | 8.5     | Self-report            | Self-report                      | Morbidity | N/A         | N/A     | N/A    | N/A               | N/A          | N/A   | N/A      | Community    | Home              | Paternal                          | Never smokers                  |
| Asthma         | Carlsten 2012  | N/A                                                 | Prospective cohort  | Canada                     | Both   | 0         | 0       | Self-report; Biomarker | Self-report                      | Incidence | 380         | 33      | 76     | 7                 | N/A          | N/A   | N/A      | N/A          | Home              | Family (anyone in household)      | Never smokers                  |
| Asthma         | Carr 2019      | Tucson Children's Respiratory Study (TCRS)          | Prospective cohort  | Arizona                    | Both   | 0         | 0       | Self-report            | Self-report                      | Incidence | 433         | N/A     | N/A    | 6                 | N/A          | N/A   | N/A      | N/A          | Home              | Maternal                          | Never smokers                  |
| Asthma         | Carrasco 2021  | INMA (Environment and Childhood) Birth Cohort Study | Prospective cohort  | Spain                      | Both   | 0         | 0       | Self-report            | Self-report                      | Incidence | 1,885       | 1,265   | 397    | 4                 | N/A          | N/A   | N/A      | N/A          | Home              | Family (anyone in household)      | Never smokers                  |
| Asthma         | Chan 2019      | N/A                                                 | Case-crossover      | Taiwan (Province of China) | Both   | 18        | 73      | Self-report            | Self-report                      | Incidence | 132         | N/A     | N/A    | N/A               | N/A          | 21    | 111      | Community    | Home and work     | Any                               | Never smokers                  |
| Asthma         | Charoenc 2013  | N/A                                                 | Case-control        | Thailand                   | Both   | 0         | 4       | Self-report            | Physician diagnosis              | Morbidity | N/A         | N/A     | N/A    | N/A               | N/A          | 462   | 462      | Hospital     | Home              | Any                               | Never smokers                  |
| Asthma         | Chen 2011      | N/A                                                 | Nested case-control | Taiwan (Province of China) | Both   | 12        | 14      | Self-report            | Self-report; Physician diagnosis | Incidence | 579         | N/A     | N/A    | 1                 | N/A          | 193   | 386      | Community    | Home              | Family (anyone in household)      | Non-smokers (former and never) |
| Asthma         | Clark 1994     | N/A                                                 | Case-control        | South East England         | Both   | 5         | 7       | Self-report            | Self-report                      | Morbidity | N/A         | N/A     | N/A    | N/A               | N/A          | 23    | 39       | Hospital     | Home              | Family (anyone in household)      | Never smokers                  |
| Asthma         | Coogan 2015    | Black Women's Health Study (BWHS)                   | Prospective cohort  | United States of America   | Female | 21        | 69      | Self-report            | Self-report                      | Incidence | N/A         | N/A     | 819    | 14.7              | 368,174      | N/A   | N/A      | N/A          | Home or work      | Any                               | Never smokers                  |
| Asthma         | Daigler 1991   | N/A                                                 | Case-control        | New York                   | Both   | 0         | 15      | Self-report            | Physician diagnosis              | Morbidity | N/A         | N/A     | N/A    | N/A               | N/A          | 137   | 246      | Hospital     | Home              | Maternal                          | Never smokers                  |

**Table S3. Summary of study characteristics**

| Health outcome | Author-Year     | Study name                                           | Study design       | Location                                                                                                         | Sex  | Age start | Age end | Exposure assessment    | Outcome assessment               | Endpoint  | Sample size | Exposed | Events | Follow-up (years) | Person-years | Cases | Controls | Control pool | Exposure location | Exposure source              | Smoking status                 |
|----------------|-----------------|------------------------------------------------------|--------------------|------------------------------------------------------------------------------------------------------------------|------|-----------|---------|------------------------|----------------------------------|-----------|-------------|---------|--------|-------------------|--------------|-------|----------|--------------|-------------------|------------------------------|--------------------------------|
| Asthma         | David 2005      | Singapore Chinese Health Study                       | Prospective cohort | Singapore                                                                                                        | Both | 45        | 74      | Self-report            | Self-report; Physician diagnosis | Incidence | 35,000      | N/A     | N/A    | 5.8               | N/A          | N/A   | N/A      | N/A          | Home              | Any                          | Never smokers                  |
| Asthma         | Dekker 2015     | Generation R Study                                   | Prospective cohort | Netherlands                                                                                                      | Both | 0         | 0       | Self-report            | Self-report; Biomarker           | Incidence | 3,457       | 77      | N/A    | 6                 | N/A          | N/A   | N/A      | N/A          | Home              | Family (anyone in household) | Never smokers                  |
| Asthma         | Ehrlich 1992    | N/A                                                  | Case-control       | New York                                                                                                         | Both | 3         | 14      | Self-report; Biomarker | Physician diagnosis              | Morbidity | N/A         | N/A     | N/A    | N/A               | N/A          | 107   | 121      | Hospital     | Home              | Maternal                     | Unspecified                    |
| Asthma         | Ehrlich 1996    | N/A                                                  | Case-control       | Western Cape                                                                                                     | Both | 7         | 8       | Self-report            | Self-report                      | Morbidity | N/A         | N/A     | N/A    | N/A               | N/A          | 325   | 250      | N/A          | Home              | Maternal                     | Never smokers                  |
| Asthma         | El-Sharif 2003  | N/A                                                  | Case-control       | Palestine                                                                                                        | Both | 6         | 12      | Self-report            | Self-report                      | Morbidity | N/A         | N/A     | N/A    | N/A               | N/A          | N/A   | N/A      | Community    | Home              | Family (anyone in household) | Never smokers                  |
| Asthma         | Elder 1996      | N/A                                                  | Prospective cohort | Australia                                                                                                        | Both | 0         | 0       | Self-report            | Self-report; Physician diagnosis | Incidence | 525         | N/A     | N/A    | 1                 | N/A          | N/A   | N/A      | N/A          | Home              | Maternal                     | Never smokers                  |
| Asthma         | Fagbule 1994    | N/A                                                  | Case-control       | Nigeria                                                                                                          | Both | 0         | 15      | Self-report            | Self-report                      | Morbidity | N/A         | N/A     | N/A    | N/A               | N/A          | 140   | 140      | Community    | Home              | Parental                     | Never smokers                  |
| Asthma         | Fernando 2009   | N/A                                                  | Case-control       | Sri Lanka                                                                                                        | Both | 5         | 12      | Self-report            | Physician diagnosis              | Morbidity | N/A         | N/A     | N/A    | N/A               | N/A          | 100   | 96       | Hospital     | Home              | Family (anyone in household) | Never smokers                  |
| Asthma         | Flexeder 2019   | European Community Respiratory Health Survey (ECRHS) | Prospective cohort | Belgium; Germany; Spain; France; Italy; United Kingdom; Iceland; Norway; Sweden; Switzerland; Australia; Estonia | Both | 20        | 44      | Self-report            | Physician diagnosis              | Incidence | 3,011       | 142     | N/A    | 20                | 60,220       | N/A   | N/A      | N/A          | Other             | Any                          | Non-smokers (former and never) |
| Asthma         | Flodin 1995     | N/A                                                  | Case-control       | Sweden                                                                                                           | Both | 20        | 65      | Self-report            | Physician diagnosis; Self-report | Morbidity | N/A         | N/A     | N/A    | N/A               | N/A          | 79    | 304      | Community    | Work              | Any                          | Any smoking status             |
| Asthma         | Frassanito 2022 | N/A                                                  | Case-control       | Lazio                                                                                                            | Both | 6         | 6       | Self-report            | Self-report; Physician diagnosis | Morbidity | N/A         | N/A     | N/A    | N/A               | N/A          | 66    | 296      | Community    | Other             | Any                          | Unspecified                    |



**Table S3. Summary of study characteristics**

| Health outcome | Author-Year        | Study name                                                                                               | Study design       | Location           | Sex  | Age start | Age end | Exposure assessment | Outcome assessment                                   | Endpoint  | Sample size | Exposed | Events | Follow-up (years) | Person-years | Cases | Controls | Control pool | Exposure location | Exposure source              | Smoking status                 |
|----------------|--------------------|----------------------------------------------------------------------------------------------------------|--------------------|--------------------|------|-----------|---------|---------------------|------------------------------------------------------|-----------|-------------|---------|--------|-------------------|--------------|-------|----------|--------------|-------------------|------------------------------|--------------------------------|
| Asthma         | Galobardes 2015    | Avon Longitudinal Study of Parents and Children (ALSPAC)                                                 | Prospective cohort | South West England | Both | 0         | 0       | Self-report         | Self-report; Biomarker                               | Incidence | 5,500       | 754     | N/A    | 8                 | N/A          | N/A   | N/A      | N/A          | Home              | Family (anyone in household) | Never smokers                  |
| Asthma         | Genuneit 2006      | International Study of Asthma and Allergies in Childhood (ISAAC II)                                      | Prospective cohort | Germany            | Both | 9         | 11      | Self-report         | Self-report                                          | Incidence | 2,936       | N/A     | N/A    | 8                 | N/A          | N/A   | N/A      | N/A          | Home              | Family (anyone in household) | Non-smokers (former and never) |
| Asthma         | Goksör 2006        | N/A                                                                                                      | Prospective cohort | Sweden             | Both | 0         | 1       | Self-report         | Self-report                                          | Incidence | 383         | N/A     | N/A    | 20                | N/A          | N/A   | N/A      | N/A          | Other             | Any                          | Never smokers                  |
| Asthma         | Grabenhenrich 2014 | German MAS-90                                                                                            | Prospective cohort | Germany            | Both | 0         | 0       | Self-report         | Self-report; Physician diagnosis                     | Incidence | 1,010       | 212     | N/A    | 20                | 20,200       | N/A   | N/A      | N/A          | Home              | Family (anyone in household) | Never smokers                  |
| Asthma         | Guo 2019           | N/A                                                                                                      | Case-control       | Shandong           | Both | 0         | 9       | Self-report         | Administrative medical records or disease registries | Morbidity | N/A         | N/A     | N/A    | N/A               | N/A          | 102   | 80       | Community    | Home              | Family (anyone in household) | Never smokers                  |
| Asthma         | Hadnadjev 2011     | N/A                                                                                                      | Case-control       | Serbia             | Both | 7         | 14      | Self-report         | Administrative medical records or disease registries | Morbidity | N/A         | N/A     | N/A    | N/A               | N/A          | 252   | 252      | Community    | Home              | Any                          | Unspecified                    |
| Asthma         | Hagendorens 2005   | Prospective study on the Influence of Perinatal factors on the Occurrence of asthma and allergies (PIPO) | Prospective cohort | Belgium            | Both | 0         | 0       | Self-report         | Self-report                                          | Incidence | 810         | N/A     | N/A    | 1                 | N/A          | N/A   | N/A      | N/A          | Other             | Any                          | Never smokers                  |
| Asthma         | Hedman 2011        | N/A                                                                                                      | Prospective cohort | Sweden             | Both | 7         | 8       | Self-report         | Self-report                                          | Incidence | 2,805       | N/A     | N/A    | 9                 | N/A          | N/A   | N/A      | N/A          | Home              | Maternal                     | Non-smokers (former and never) |

**Table S3. Summary of study characteristics**

| Health outcome | Author-Year       | Study name                                                                          | Study design       | Location                   | Sex  | Age start | Age end | Exposure assessment    | Outcome assessment                                                        | Endpoint  | Sample size | Exposed | Events | Follow-up (years) | Person-years | Cases | Controls | Control pool | Exposure location         | Exposure source              | Smoking status |
|----------------|-------------------|-------------------------------------------------------------------------------------|--------------------|----------------------------|------|-----------|---------|------------------------|---------------------------------------------------------------------------|-----------|-------------|---------|--------|-------------------|--------------|-------|----------|--------------|---------------------------|------------------------------|----------------|
| Asthma         | Horwood 1985      | Christchurch Child Development Study                                                | Prospective cohort | New Zealand                | Both | 0         | 0       | Self-report            | Self-report; Physician diagnosis                                          | Incidence | 1,056       | N/A     | N/A    | 6                 | N/A          | N/A   | N/A      | N/A          | Home                      | Parental                     | Never smokers  |
| Asthma         | Huang 2022        | Childhood Environment and Allergic Diseases Study (CEAS)                            | Case-control       | Taiwan (Province of China) | Both | 3         | 18      | Self-report            | Physician diagnosis                                                       | Morbidity | N/A         | N/A     | N/A    | N/A               | N/A          | 41    | 106      | Hospital     | Home                      | Family (anyone in household) | Never smokers  |
| Asthma         | Hunt 2011         | Syracuse AUDIT (Assessment of Urban Dwellings for Indoor Toxics) birth cohort study | Prospective cohort | New York                   | Both | 0         | 0       | Self-report; Biomarker | Physician diagnosis                                                       | Incidence | 103         | 70      | 39     | 1                 | N/A          | N/A   | N/A      | N/A          | Home                      | Family (anyone in household) | Never smokers  |
| Asthma         | Hwang 2011        | N/A                                                                                 | Case-control       | Taiwan (Province of China) | Both | 1         | 7       | Self-report            | Self-report                                                               | Morbidity | N/A         | N/A     | N/A    | N/A               | N/A          | 188   | 376      | N/A          | Home                      | Family (anyone in household) | Never smokers  |
| Asthma         | Håberg 2007       | MoBa Study                                                                          | Prospective cohort | Norway                     | Both | 0         | 0       | Self-report            | Self-report                                                               | Incidence | 22,390      | N/A     | N/A    | 1.5               | N/A          | N/A   | N/A      | N/A          | Home                      | Maternal; Paternal           | Never smokers  |
| Asthma         | Izuhara 2016      | The Nagahama Study                                                                  | Prospective cohort | Shiga                      | Both | 30        | 75      | Self-report            | Self-report                                                               | Incidence | N/A         | N/A     | N/A    | 2                 | N/A          | N/A   | N/A      | N/A          | Other                     | Any                          | Unspecified    |
| Asthma         | Jaakkola 2001     | N/A                                                                                 | Prospective cohort | Oslo                       | Both | 0         | 0       | Self-report            | Self-report; Physician diagnosis                                          | Incidence | 2,531       | N/A     | N/A    | 4                 | N/A          | N/A   | N/A      | N/A          | Home                      | Family (anyone in household) | Never smokers  |
| Asthma         | Jaakkola 2003     | N/A                                                                                 | Case-control       | Finland                    | Both | 21        | 63      | Self-report            | Physician diagnosis; Administrative medical records or disease registries | Morbidity | N/A         | N/A     | N/A    | N/A               | N/A          | 683   | 1,424    | Community    | Home and work; Work; Home | Any                          | Never smokers  |
| Asthma         | Jedrychowski 2008 | N/A                                                                                 | Prospective cohort | Małopolskie                | Both | 0         | 0       | Self-report            | Self-report                                                               | Incidence | 468         | N/A     | N/A    | 2                 | N/A          | N/A   | N/A      | N/A          | Home                      | Family (anyone in household) | Never smokers  |
| Asthma         | Kamran 2015       | N/A                                                                                 | Case-control       | Pakistan                   | Both | 1         | 15      | Self-report            | Physician diagnosis                                                       | Morbidity | N/A         | N/A     | N/A    | N/A               | N/A          | 173   | 173      | Community    | Home                      | Parental                     | Unspecified    |

**Table S3. Summary of study characteristics**

| Health outcome | Author-Year         | Study name                                | Study design       | Location                 | Sex  | Age start | Age end | Exposure assessment | Outcome assessment                                                | Endpoint  | Sample size | Exposed | Events | Follow-up (years) | Person-years | Cases | Controls | Control pool | Exposure location | Exposure source              | Smoking status                 |
|----------------|---------------------|-------------------------------------------|--------------------|--------------------------|------|-----------|---------|---------------------|-------------------------------------------------------------------|-----------|-------------|---------|--------|-------------------|--------------|-------|----------|--------------|-------------------|------------------------------|--------------------------------|
| Asthma         | Kanoh 2012          | N/A                                       | Prospective cohort | Japan                    | Both | 0.5       | 0.5     | Self-report         | Self-report                                                       | Incidence | 62,165      | 15,909  | N/A    | 4.5               | N/A          | N/A   | N/A      | N/A          | Home              | Maternal; Paternal           | Never smokers                  |
| Asthma         | Karunasekera 2001   | N/A                                       | Case-control       | Sri Lanka                | Both | 1         | 10      | Self-report         | Physician diagnosis                                               | Morbidity | N/A         | N/A     | N/A    | N/A               | N/A          | 300   | 300      | Hospital     | Other             | Any                          | Unspecified                    |
| Asthma         | Khozime 2019        | N/A                                       | Case-control       | Khorasan-e-Razavi        | Both | 5         | 70      | Self-report         | Physician diagnosis                                               | Morbidity | N/A         | N/A     | N/A    | N/A               | N/A          | 50    | 50       | Hospital     | Home              | Family (anyone in household) | Non-smokers (former and never) |
| Asthma         | Kim 2018            | Elementary School Student Cohort          | Case-cohort        | Republic of Korea        | Both | 5.68      | 12.16   | Self-report         | Self-report; Physician diagnosis                                  | Incidence | 3,770       | 881     | N/A    | 4                 | 13,480       | N/A   | N/A      | N/A          | Other             | Any                          | Never smokers                  |
| Asthma         | Klinnert 2001       | N/A                                       | Prospective cohort | United States of America | Both | 0         | 0       | Self-report         | Administrative medical records or disease registries; Self-report | Incidence | 145         | N/A     | N/A    | 8                 | N/A          | N/A   | N/A      | N/A          | Home              | Maternal                     | Never smokers                  |
| Asthma         | Kobyletzki 2012     | Dampness in Building and Health study     | Prospective cohort | Sweden                   | Both | 1         | 2       | Self-report         | Self-report                                                       | Incidence | 3,124       | 694     | 73     | 5                 | N/A          | N/A   | N/A      | N/A          | Home              | Parental                     | Never smokers                  |
| Asthma         | Kumar 2021          | N/A                                       | Case-control       | Maharashtra              | Both | 6         | 12      | Self-report         | Physician diagnosis                                               | Morbidity | N/A         | N/A     | N/A    | N/A               | N/A          | 180   | 180      | Community    | Home              | Maternal                     | Unspecified                    |
| Asthma         | Kurukulaarachy 2006 | N/A                                       | Prospective cohort | South East England       | Both | 0         | 0       | Self-report         | Self-report                                                       | Incidence | 1,373       | N/A     | 367    | 10                | N/A          | N/A   | N/A      | N/A          | Home              | Parental                     | Never smokers                  |
| Asthma         | Lawson 2014         | National Population Health Survey         | Prospective cohort | Canada                   | Both | 12        | 18      | Self-report         | Self-report                                                       | Incidence | 2,038,890   | 825,750 | N/A    | 12                | 21,274,890   | N/A   | N/A      | N/A          | Home              | Family (anyone in household) | Never smokers                  |
| Asthma         | Leen 1994           | N/A                                       | Case-control       | Ireland                  | Both | 0         | 15      | Self-report         | Administrative medical records or disease registries              | Morbidity | N/A         | N/A     | N/A    | N/A               | N/A          | 115   | 96       | Community    | Home              | Family (anyone in household) | Unspecified                    |
| Asthma         | Lemanske 2005       | Childhood Origins of ASThma (COAST) study | Prospective cohort | United States of America | Both | 0         | 0       | Self-report         | Self-report; Physician diagnosis                                  | Incidence | 275         | N/A     | N/A    | 3                 | N/A          | N/A   | N/A      | N/A          | Other             | Any                          | Never smokers                  |

**Table S3. Summary of study characteristics**

| Health outcome | Author-Year     | Study name                                                | Study design        | Location      | Sex  | Age start | Age end | Exposure assessment | Outcome assessment                                                        | Endpoint  | Sample size | Exposed | Events | Follow-up (years) | Person-years | Cases | Controls | Control pool | Exposure location | Exposure source              | Smoking status     |
|----------------|-----------------|-----------------------------------------------------------|---------------------|---------------|------|-----------|---------|---------------------|---------------------------------------------------------------------------|-----------|-------------|---------|--------|-------------------|--------------|-------|----------|--------------|-------------------|------------------------------|--------------------|
| Asthma         | Li 2013         | open cohort                                               | Prospective cohort  | Sweden        | Both | 2         | 11      | Self-report         | Administrative medical records or disease registries                      | Incidence | 864,468     | 231,645 | 17,672 | 11                | 9,509,148    | N/A   | N/A      | N/A          | Home              | Maternal                     | Never smokers      |
| Asthma         | Liljeqvist 1997 | Psychosocial Risks for Allergy Development (PRAD)-Project | Case-control        | Oslo          | Both | 7         | 10      | Self-report         | Self-report                                                               | Morbidity | N/A         | N/A     | N/A    | N/A               | N/A          | 293   | 413      | Community    | Home              | Parental                     | Never smokers      |
| Asthma         | Litonjua 2001   | N/A                                                       | Prospective cohort  | Massachusetts | Both | 0         | 0.00548 | Self-report         | Self-report; Physician diagnosis                                          | Incidence | 222         | N/A     | N/A    | 2                 | N/A          | N/A   | N/A      | N/A          | Home              | Family (anyone in household) | Never smokers      |
| Asthma         | Majeed 2008     | N/A                                                       | Case-control        | Sindh         | Both | 1         | 8       | Self-report         | Physician diagnosis; Administrative medical records or disease registries | Morbidity | N/A         | N/A     | N/A    | N/A               | N/A          | 200   | 199      | Hospital     | Home              | Family (anyone in household) | Unspecified        |
| Asthma         | Marbury 1996    | Indoor Air and Children's Health Study                    | Prospective cohort  | Minnesota     | Both | 0         | 0.167   | Self-report         | Administrative medical records or disease registries; Self-report         | Incidence | 1,424       | N/A     | N/A    | 2                 | 2,537        | N/A   | N/A      | N/A          | Home              | Maternal                     | Never smokers      |
| Asthma         | McConnell 2002  | Southern California Children's Health Study               | Prospective cohort  | California    | Both | 9         | 16      | Self-report         | Self-report; Physician diagnosis                                          | Incidence | 3,535       | N/A     | N/A    | 5                 | N/A          | N/A   | N/A      | N/A          | Home              | Maternal                     | Any smoking status |
| Asthma         | McKeever 2001   | N/A                                                       | Prospective cohort  | West Midlands | Both | 0         | 0       | Disease; Registry   | Administrative medical records or disease registries                      | Incidence | 29,238      | N/A     | N/A    | 2.9               | N/A          | N/A   | N/A      | N/A          | Home              | Maternal; Paternal           | Unspecified        |
| Asthma         | Melsom 2001     | N/A                                                       | Nested case-control | Nepal         | Both | 11        | 17      | Self-report         | Self-report                                                               | Incidence | 247         | N/A     | N/A    | 0.167             | N/A          | 121   | 126      | Community    | Home              | Family (anyone in household) | Unspecified        |
| Asthma         | Midodzi 2010    | N/A                                                       | Prospective cohort  | Canada        | Both | 0         | 1       | Self-report         | Self-report                                                               | Incidence | 8,499       | 3,429   | N/A    | 4                 | N/A          | N/A   | N/A      | N/A          | Home              | Parental                     | Never smokers      |

**Table S3. Summary of study characteristics**

| Health outcome | Author-Year         | Study name                                                   | Study design        | Location                 | Sex  | Age start | Age end | Exposure assessment    | Outcome assessment                                                | Endpoint  | Sample size | Exposed | Events | Follow-up (years) | Person-years | Cases | Controls | Control pool | Exposure location | Exposure source                        | Smoking status                  |
|----------------|---------------------|--------------------------------------------------------------|---------------------|--------------------------|------|-----------|---------|------------------------|-------------------------------------------------------------------|-----------|-------------|---------|--------|-------------------|--------------|-------|----------|--------------|-------------------|----------------------------------------|---------------------------------|
| Asthma         | Milanzi 2017        | PIAMA                                                        | Prospective cohort  | Netherlands              | Both | 0         | 0       | Self-report            | Self-report                                                       | Incidence | 1,454       | N/A     | N/A    | 17                | 24,718       | N/A   | N/A      | N/A          | Other             | Any                                    | Never smokers                   |
| Asthma         | Milner 2004         | N/A                                                          | Prospective cohort  | United States of America | Both | 0         | 0       | Self-report            | Self-report; Physician diagnosis                                  | Incidence | 8,071       | N/A     | N/A    | 3                 | N/A          | N/A   | N/A      | N/A          | Home              | Family (anyone in household)           | Never smokers                   |
| Asthma         | Mommers 2005        | N/A                                                          | Nested case-control | Germany; Netherlands     | Both | 7         | 8       | Self-report            | Self-report                                                       | Incidence | 1,191       | N/A     | N/A    | 1                 | N/A          | 590   | 601      | Community    | Other             | Any                                    | Unspecified                     |
| Asthma         | Morfin-Maciuel 2006 | N/A                                                          | Case-control        | Mexico City              | Both | 13        | 14      | Self-report            | Self-report                                                       | Morbidity | N/A         | N/A     | N/A    | N/A               | N/A          | 227   | 5,570    | Community    | Home              | Maternal; Family (anyone in household) | Any smoking status; Unspecified |
| Asthma         | Mpairwe 2019        | N/A                                                          | Case-control        | Uganda                   | Both | 5         | 17      | Self-report            | Physician diagnosis                                               | Morbidity | N/A         | N/A     | N/A    | N/A               | N/A          | 555   | 1,115    | Community    | Home              | Family (anyone in household)           | Never smokers                   |
| Asthma         | Mumcuoglu 1994      | N/A                                                          | Case-control        | Palestine                | Both | 3         | 15      | Self-report            | Self-report; Administrative medical records or disease registries | Morbidity | N/A         | N/A     | N/A    | N/A               | N/A          | 300   | 100      | Community    | Home              | Paternal; Other family (not spouse)    | Unspecified                     |
| Asthma         | Murray 2004         | National Asthma Campaign Manchester Asthma and Allergy Study | Prospective cohort  | United Kingdom           | Both | 0         | 3       | Self-report            | Physician diagnosis; Self-report                                  | Incidence | 369         | 70      | 198    | 3                 | N/A          | N/A   | N/A      | N/A          | Home              | Maternal                               | Never smokers                   |
| Asthma         | Muñoz 2012          | N/A                                                          | Case-control        | Coahuila                 | Both | 6         | 9       | Self-report; Biomarker | Self-report                                                       | Morbidity | N/A         | N/A     | N/A    | N/A               | N/A          | 90    | 111      | Community    | Home              | Family (anyone in household)           | Never smokers                   |
| Asthma         | Neuman 2012         | ALSPAC                                                       | Prospective cohort  | South West England       | Both | 0         | 0       | Self-report            | Self-report                                                       | Incidence | 5,867       | 407     | N/A    | 6                 | N/A          | N/A   | N/A      | N/A          | Home              | Maternal                               | Never smokers                   |
| Asthma         | Neuman 2012         | AMICS-Menorca                                                | Prospective cohort  | Spain                    | Both | 0         | 0       | Self-report            | Self-report                                                       | Incidence | 280         | 12      | N/A    | 6                 | N/A          | N/A   | N/A      | N/A          | Home              | Maternal                               | Never smokers                   |
| Asthma         | Neuman 2012         | DARC                                                         | Prospective cohort  | Denmark                  | Both | 0.083     | 0.167   | Self-report            | Self-report                                                       | Incidence | 332         | 17      | N/A    | 6                 | N/A          | N/A   | N/A      | N/A          | Home              | Maternal                               | Never smokers                   |
| Asthma         | Neuman 2012         | GINIplus                                                     | Prospective cohort  | Germany                  | Both | 0         | 0       | Self-report            | Self-report                                                       | Incidence | 3,296       | 137     | N/A    | 6                 | N/A          | N/A   | N/A      | N/A          | Home              | Maternal                               | Never smokers                   |

**Table S3. Summary of study characteristics**

| Health outcome | Author-Year    | Study name                                                                              | Study design         | Location                 | Sex  | Age start | Age end | Exposure assessment | Outcome assessment                                   | Endpoint  | Sample size | Exposed | Events | Follow-up (years) | Person-years | Cases | Controls | Control pool | Exposure location | Exposure source              | Smoking status |
|----------------|----------------|-----------------------------------------------------------------------------------------|----------------------|--------------------------|------|-----------|---------|---------------------|------------------------------------------------------|-----------|-------------|---------|--------|-------------------|--------------|-------|----------|--------------|-------------------|------------------------------|----------------|
| Asthma         | Neuman 2012    | LISAplus                                                                                | Prospective cohort   | Germany                  | Both | 0.00822   | 0.011   | Self-report         | Self-report                                          | Incidence | 1,488       | 67      | N/A    | 6                 | N/A          | N/A   | N/A      | N/A          | Home              | Maternal                     | Never smokers  |
| Asthma         | Neuman 2012    | MAS                                                                                     | Prospective cohort   | Germany                  | Both | 0.083     | 0.167   | Self-report         | Self-report                                          | Incidence | 688         | 127     | N/A    | 6                 | N/A          | N/A   | N/A      | N/A          | Home              | Maternal                     | Never smokers  |
| Asthma         | Neuman 2012    | PIAMA-NHS                                                                               | Prospective cohort   | Netherlands              | Both | 0         | 0       | Self-report         | Self-report                                          | Incidence | 2,347       | 56      | N/A    | 6                 | N/A          | N/A   | N/A      | N/A          | Home              | Maternal                     | Never smokers  |
| Asthma         | Nguyen 2010    | N/A                                                                                     | Nested case-control  | New York                 | Both | 0         | 99      | Self-report         | Self-report                                          | Incidence | 4,727       | N/A     | N/A    | 1                 | N/A          | 1,555 | 3,172    | Hospital     | Home              | Family (anyone in household) | Unspecified    |
| Asthma         | Norbäck 2018   | China-Children-Homes-Health (CCHH) Study                                                | Retrospective cohort | China                    | Both | 0         | 0       | Self-report         | Self-report                                          | Incidence | 37,686      | 22,176  | N/A    | 6                 | N/A          | N/A   | N/A      | N/A          | Home              | Family (anyone in household) | Never smokers  |
| Asthma         | O'Connell 1974 | N/A                                                                                     | Case-control         | United States of America | Both | 2         | 16      | Self-report         | Administrative medical records or disease registries | Morbidity | N/A         | N/A     | N/A    | N/A               | N/A          | 400   | 228      | Hospital     | Home              | Parental                     | Unspecified    |
| Asthma         | Oddy 1999      | Western Australian Pregnancy Cohort Study                                               | Prospective cohort   | Australia                | Both | 0         | 0       | Self-report         | Self-report                                          | Incidence | 2,187       | N/A     | N/A    | 6                 | N/A          | N/A   | N/A      | N/A          | Home              | Family (anyone in household) | Never smokers  |
| Asthma         | Palvo 2008     | N/A                                                                                     | Case-control         | São Paulo                | Both | 6         | 7       | Self-report         | Self-report                                          | Morbidity | N/A         | N/A     | N/A    | N/A               | N/A          | N/A   | N/A      | Community    | Home              | Family (anyone in household) | Never smokers  |
| Asthma         | Patrick 2020   | Canadian Healthy Infant Longitudinal Development (CHILD) prospective birth cohort study | Prospective cohort   | Canada                   | Both | 0         | 0       | Self-report         | Physician diagnosis; Self-report                     | Incidence | N/A         | 500     | 118    | 5                 | N/A          | N/A   | N/A      | N/A          | Home              | Family (anyone in household) | Never smokers  |
| Asthma         | Pattemore 2018 | The New Zealand Asthma and Allergy Cohort Study                                         | Prospective cohort   | New Zealand              | Both | 0         | 0       | Self-report         | Self-report                                          | Incidence | 2,167       | N/A     | N/A    | 4.8               | 9,208        | N/A   | N/A      | N/A          | Home              | Maternal                     | Never smokers  |

**Table S3. Summary of study characteristics**

| Health outcome | Author-Year   | Study name                                                      | Study design         | Location                                  | Sex  | Age start | Age end | Exposure assessment    | Outcome assessment               | Endpoint  | Sample size | Exposed | Events | Follow-up (years) | Person-years | Cases | Controls | Control pool | Exposure location | Exposure source                     | Smoking status     |
|----------------|---------------|-----------------------------------------------------------------|----------------------|-------------------------------------------|------|-----------|---------|------------------------|----------------------------------|-----------|-------------|---------|--------|-------------------|--------------|-------|----------|--------------|-------------------|-------------------------------------|--------------------|
| Asthma         | Pokharel 2001 | N/A                                                             | Case-control         | Haryana, Rural                            | Both | 11        | 15      | Self-report            | Self-report                      | Morbidity | N/A         | N/A     | N/A    | N/A               | N/A          | 40    | 80       | Community    | Home              | Family (anyone in household)        | Unspecified        |
| Asthma         | Pokharel 2007 | N/A                                                             | Case-control         | Nepal                                     | Both | 11        | 15      | Self-report            | Self-report                      | Morbidity | N/A         | N/A     | N/A    | N/A               | N/A          | 120   | 240      | Community    | Home              | Family (anyone in household)        | Unspecified        |
| Asthma         | Polk 2004     | Asthma Multicenter Infants Cohort Study                         | Prospective cohort   | South East England; Spain                 | Both | 0         | 4       | Self-report            | Self-report                      | Incidence | 1,289       | N/A     | N/A    | 4                 | N/A          | N/A   | N/A      | N/A          | Home              | Maternal                            | Never smokers      |
| Asthma         | Polosa 2005   | N/A                                                             | Retrospective cohort | Sicilia                                   | Both | 18        | 40      | Self-report            | Physician diagnosis              | Incidence | 436         | 178     | N/A    | 10                | N/A          | N/A   | N/A      | N/A          | Home              | Parental                            | Unspecified        |
| Asthma         | Ponsonby 2000 | N/A                                                             | Prospective cohort   | Australia                                 | Both | 0         | 0       | Self-report            | Self-report                      | Incidence | 6,378       | N/A     | N/A    | 7                 | N/A          | N/A   | N/A      | N/A          | Home              | Family (anyone in household)        | Never smokers      |
| Asthma         | Ratageri 2000 | N/A                                                             | Case-control         | Delhi                                     | Both | 5         | 15      | Self-report            | Physician diagnosis              | Morbidity | N/A         | N/A     | N/A    | N/A               | N/A          | 60    | 60       | Hospital     | Home              | Family (anyone in household)        | Any smoking status |
| Asthma         | Rennie 2008   | N/A                                                             | Case-control         | Canada                                    | Both | 6         | 13      | Self-report            | Self-report; Physician diagnosis | Morbidity | N/A         | N/A     | N/A    | N/A               | N/A          | 89    | 108      | Community    | Home              | Any                                 | Unspecified        |
| Asthma         | Rosa 2011     | N/A                                                             | Prospective cohort   | New York                                  | Both | 0         | 0       | Self-report; Biomarker | Self-report; Physician diagnosis | Incidence | 290         | N/A     | N/A    | 6                 | N/A          | N/A   | N/A      | N/A          | Home              | Family (anyone in household)        | Never smokers      |
| Asthma         | Schroer 2009  | Childhood Allergy and Air Pollution Study (CCAAPS)              | Prospective cohort   | Ohio                                      | Both | 0         | 0       | Self-report            | Self-report                      | Incidence | 570         | N/A     | N/A    | 2                 | N/A          | N/A   | N/A      | N/A          | Home              | Family (anyone in household)        | Never smokers      |
| Asthma         | Sears 2002    | Dunedin Multidisciplinary Health and Development Research Study | Prospective cohort   | New Zealand                               | Both | 0         | 0       | Self-report            | Self-report                      | Incidence | 1,037       | N/A     | N/A    | 26                | N/A          | N/A   | N/A      | N/A          | Home              | Paternal                            | Unspecified        |
| Asthma         | Selby 2018    | EuroPrevall                                                     | Prospective cohort   | Iceland; South East England; Netherlands; | Both | 0         | 0       | Self-report            | Self-report                      | Incidence | 15,745      | 2,915   | 1,170  | 2.5               | N/A          | N/A   | N/A      | N/A          | Home              | Maternal; Other family (not spouse) | Never smokers      |

**Table S3. Summary of study characteristics**

| Health outcome | Author-Year    | Study name                                                  | Study design         | Location                                              | Sex  | Age start | Age end | Exposure assessment | Outcome assessment                                   | Endpoint  | Sample size | Exposed | Events | Follow-up (years) | Person-years | Cases | Controls | Control pool | Exposure location | Exposure source              | Smoking status |
|----------------|----------------|-------------------------------------------------------------|----------------------|-------------------------------------------------------|------|-----------|---------|---------------------|------------------------------------------------------|-----------|-------------|---------|--------|-------------------|--------------|-------|----------|--------------|-------------------|------------------------------|----------------|
|                |                |                                                             |                      | Germany; Łódzkie; Lithuania; Spain; Lombardia; Greece |      |           |         |                     |                                                      |           |             |         |        |                   |              |       |          |              |                   |                              |                |
| Asthma         | Sherman 1990   | N/A                                                         | Prospective cohort   | Massachusetts                                         | Both | 5         | 9       | Self-report         | Self-report; Physician diagnosis                     | Incidence | 770         | N/A     | N/A    | 11                | N/A          | N/A   | N/A      | N/A          | Home              | Maternal; Paternal           | Unspecified    |
| Asthma         | Slob 2020      | Netherlands Twin Register (NTR) study                       | Retrospective cohort | Netherlands                                           | Both | 3         | 3       | Self-report         | Self-report                                          | Incidence | 69,465      | 18,009  | 14,739 | 9                 | N/A          | N/A   | N/A      | N/A          | Home              | Maternal; Paternal           | Never smokers  |
| Asthma         | Snodgrass 2016 | Growing Up in Singapore Towards healthy Outcomes (GUSTO)    | Prospective cohort   | Singapore                                             | Both | 0         | 0       | Self-report         | Self-report                                          | Incidence | 1,236       | N/A     | N/A    | 2                 | N/A          | N/A   | N/A      | N/A          | Home              | Family (anyone in household) | Never smokers  |
| Asthma         | Strachan 1996  | British National Child Development Study                    | Prospective cohort   | United Kingdom                                        | Both | 0         | 0       | Self-report         | Self-report                                          | Incidence | 4,384       | N/A     | N/A    | 33                | N/A          | N/A   | N/A      | N/A          | Home              | Paternal; Maternal           | Unspecified    |
| Asthma         | Sun 2015       | Study of Prevention of Asthma in Children in Europe (SPACE) | Prospective cohort   | Austria; England; Germany                             | Both | 0         | 0       | Self-report         | Self-report                                          | Incidence | 549         | 119     | 26     | 3                 | N/A          | N/A   | N/A      | N/A          | Home              | Parental                     | Never smokers  |
| Asthma         | Surdu 2006     | N/A                                                         | Case-control         | New York                                              | Both | 2         | 14      | Self-report         | Administrative medical records or disease registries | Morbidity | N/A         | N/A     | N/A    | N/A               | N/A          | 25    | 25       | Hospital     | Home              | Family (anyone in household) | Unspecified    |
| Asthma         | Tadaki 2009    | N/A                                                         | Prospective cohort   | Gunma                                                 | Both | 0         | 0       | Self-report         | Self-report; Physician diagnosis                     | Incidence | 213         | N/A     | 188    | 1                 | N/A          | N/A   | N/A      | N/A          | Home              | Any                          | Never smokers  |
| Asthma         | Takemura 2001  | The Tokorozawa Childhood                                    | Case-control         | Saitama                                               | Both | 6         | 15      | Self-report         | Self-report; Physician diagnosis                     | Morbidity | N/A         | N/A     | N/A    | N/A               | N/A          | 2,315 | 21,513   | Community    | Home              | Parental                     | Unspecified    |



**Table S3. Summary of study characteristics**

| Health outcome | Author-Year  | Study name                                                                                                                                                                                                                        | Study design       | Location      | Sex  | Age start | Age end | Exposure assessment | Outcome assessment | Endpoint  | Sample size | Exposed | Events | Follow-up (years) | Person-years | Cases | Controls | Control pool | Exposure location | Exposure source              | Smoking status |
|----------------|--------------|-----------------------------------------------------------------------------------------------------------------------------------------------------------------------------------------------------------------------------------|--------------------|---------------|------|-----------|---------|---------------------|--------------------|-----------|-------------|---------|--------|-------------------|--------------|-------|----------|--------------|-------------------|------------------------------|----------------|
| Asthma         | Tanaka 2008  | Asthma and Pollinosis Study<br>Osaka Maternal and Child Health Study                                                                                                                                                              | Prospective cohort | Osaka         | Both | 0         | 0       | Self-report         | Self-report        | Incidence | 763         | 195     | 33     | 2                 | N/A          | N/A   | N/A      | N/A          | Home              | Family (anyone in household) | Never smokers  |
| Asthma         | Tanaka 2017  | Kyushu Okinawa Maternal and Child Health Study (KOMCHS)                                                                                                                                                                           | Prospective cohort | Japan         | Both | 0         | 0       | Self-report         | Self-report        | Incidence | 1,354       | 601     | 373    | 2.4               | N/A          | N/A   | N/A      | N/A          | Home              | Family (anyone in household) | Never smokers  |
| Asthma         | Taveras 2006 | Project Viva cohort study                                                                                                                                                                                                         | Prospective cohort | Massachusetts | Both | 0         | 0       | Self-report         | Self-report        | Incidence | 1,372       | N/A     | N/A    | 2                 | N/A          | N/A   | N/A      | N/A          | Home              | Maternal                     | Never smokers  |
| Asthma         | Thacher 2014 | Children, Allergy, Milieu, Stockholm, Epidemiologic (BAMSE) study                                                                                                                                                                 | Prospective cohort | Sweden        | Both | 0.167     | 0.167   | Self-report         | Self-report        | Incidence | 3,978       | N/A     | N/A    | 16                | N/A          | N/A   | N/A      | N/A          | Home              | Parental                     | Never smokers  |
| Asthma         | Thacher 2018 | Mechanisms of the Development of Allergy (MeDALL) project [comprised of Children, Allergy, Milieu, Stockholm, Epidemiology (BAMSE); German Infant Nutritional Intervention (GINIplus); Influences of Lifestyle-Related Factors on | Prospective cohort | Germany       | Both | 0         | 0       | Self-report         | Self-report        | Incidence | 18,151      | 3,232   | N/A    | 16                | N/A          | N/A   | N/A      | N/A          | Home              | Family (anyone in household) | Never smokers  |

**Table S3. Summary of study characteristics**

| Health outcome | Author-Year  | Study name                                                   | Study design        | Location                                  | Sex  | Age start | Age end | Exposure assessment | Outcome assessment               | Endpoint  | Sample size | Exposed | Events | Follow-up (years) | Person-years | Cases | Controls | Control pool | Exposure location | Exposure source              | Smoking status     |
|----------------|--------------|--------------------------------------------------------------|---------------------|-------------------------------------------|------|-----------|---------|---------------------|----------------------------------|-----------|-------------|---------|--------|-------------------|--------------|-------|----------|--------------|-------------------|------------------------------|--------------------|
| Asthma         | Thorn 2001   | N/A                                                          | Nested case-control | Sweden                                    | Both | 20        | 50      | Self-report         | Self-report; Physician diagnosis | Incidence | 1,044       | N/A     | N/A    | 1                 | N/A          | 174   | 870      | Community    | Home              | Family (anyone in household) | Never smokers      |
| Asthma         | Toizumi 2019 | Nha Trang Birth Cohort Study                                 | Prospective cohort  | Viet Nam                                  | Both | 0         | 0       | Self-report         | Self-report                      | Incidence | 1,202       | 685     | N/A    | 6                 | N/A          | N/A   | N/A      | N/A          | Home              | Family (anyone in household) | Never smokers      |
| Asthma         | Usemann 2018 | Basel-Bern Infant Lung Development (BILD) birth-cohort study | Prospective cohort  | Switzerland                               | Both | 0         | 0       | Self-report         | Self-report                      | Incidence | 322         | N/A     | 31     | 3                 | N/A          | N/A   | N/A      | N/A          | Home              | Parental                     | Never smokers      |
| Asthma         | Valk 2012    | Generation R cohort                                          | Prospective cohort  | Netherlands                               | Both | 0         | 0       | Self-report         | Self-report                      | Incidence | 1,342       | 117     | N/A    | 4                 | N/A          | N/A   | N/A      | N/A          | Home              | Family (anyone in household) | Never smokers      |
| Asthma         | Valk 2012    | PIAMA cohort                                                 | Prospective cohort  | Netherlands                               | Both | 0         | 0       | Self-report         | Self-report                      | Incidence | 1,570       | 445     | N/A    | 4                 | N/A          | N/A   | N/A      | N/A          | Home              | Family (anyone in household) | Never smokers      |
| Asthma         | Vázquez 2006 | N/A                                                          | Case-control        | Tamaulipas                                | Both | 13        | 18      | Self-report         | Self-report                      | Morbidity | N/A         | N/A     | N/A    | N/A               | N/A          | 253   | 3,750    | Community    | Home              | Family (anyone in household) | Any smoking status |
| Asthma         | Wada 2021    | N/A                                                          | Prospective cohort  | Japan                                     | Both | 0         | 0       | Self-report         | Self-report                      | Incidence | 42,136      | 1,905   | 901    | 1                 | N/A          | N/A   | N/A      | N/A          | Home              | Family (anyone in household) | Never smokers      |
| Asthma         | Wang 2021    | RHINE II/RHINE III                                           | Prospective cohort  | Denmark; Estonia; Norway; Sweden; Iceland | Both | 27        | 55      | Self-report         | Self-report; Physician diagnosis | Incidence | 11,506      | 1,023   | N/A    | 11.3              | N/A          | N/A   | N/A      | N/A          | Home              | Family (anyone in household) | Never smokers      |
| Asthma         | Werff 2013   | N/A                                                          | Prospective cohort  | Cuba                                      | Both | 4         | 14      | Self-report         | Self-report                      | Incidence | 770         | 364     | 31     | 3.5               | N/A          | N/A   | N/A      | N/A          | Home              | Family (anyone in household) | Never smokers      |

**Table S3. Summary of study characteristics**

| Health outcome | Author-Year   | Study name                            | Study design        | Location                   | Sex    | Age start | Age end | Exposure assessment | Outcome assessment                                                       | Endpoint              | Sample size | Exposed | Events | Follow-up (years) | Person-years | Cases | Controls | Control pool | Exposure location | Exposure source                   | Smoking status |
|----------------|---------------|---------------------------------------|---------------------|----------------------------|--------|-----------|---------|---------------------|--------------------------------------------------------------------------|-----------------------|-------------|---------|--------|-------------------|--------------|-------|----------|--------------|-------------------|-----------------------------------|----------------|
| Asthma         | Willers 1991  | N/A                                   | Case-control        | Sweden                     | Both   | 3         | 15      | Self-report         | Administrative medical records or disease registries                     | Morbidity             | N/A         | N/A     | N/A    | N/A               | N/A          | 35    | 59       | Community    | Home              | Parental                          | Unspecified    |
| Asthma         | Yang 1998     | N/A                                   | Case-control        | Taiwan (Province of China) | Both   | 3         | 15      | Self-report         | Physician diagnosis                                                      | Morbidity             | N/A         | N/A     | N/A    | N/A               | N/A          | 86    | 86       | Hospital     | Home              | Family (anyone in household)      | Never smokers  |
| Asthma         | Yang 1998     | N/A                                   | Case-control        | Taiwan (Province of China) | Both   | 6         | 12      | Self-report         | Self-report                                                              | Morbidity             | N/A         | N/A     | N/A    | N/A               | N/A          | 165   | 165      | Community    | Home              | Parental                          | Never smokers  |
| Asthma         | Youssef 2018  | N/A                                   | Case-control        | Egypt                      | Both   | 3         | 8       | Self-report         | Self-report; Physician diagnosis                                         | Morbidity             | N/A         | N/A     | N/A    | N/A               | N/A          | 45    | 52       | N/A          | Home              | Family (anyone in household)      | Never smokers  |
| Asthma         | Zejda 2003    | N/A                                   | Prospective cohort  | Śląskie                    | Both   | 7         | 9       | Self-report         | Self-report; Physician diagnosis                                         | Incidence             | 663         | N/A     | N/A    | 7                 | N/A          | N/A   | N/A      | N/A          | Home              | Parental                          | Unspecified    |
| Asthma         | Zheng 2002    | N/A                                   | Case-control        | Beijing                    | Both   | 6         | 10      | Self-report         | Self-report; Physician diagnosis                                         | Morbidity             | N/A         | N/A     | N/A    | N/A               | N/A          | 403   | 806      | Community    | Home              | Family (anyone in household)      | Unspecified    |
| Breast cancer  | Ahern 2009    | N/A                                   | Case-control        | Massachusetts              | Female | 28        | 75      | Self-report         | Administrative medical records or disease registries                     | Morbidity             | N/A         | N/A     | N/A    | N/A               | N/A          | 215   | 173      | Community    | Home or work      | Any                               | Never smokers  |
| Breast cancer  | Alberg 2004   | CLUE II                               | Nested case-control | Maryland                   | Female | 18        | 99      | Self-report         | Administrative medical records or disease registries; Death certificates | Incidence & Mortality | 128         | N/A     | N/A    | N/A               | N/A          | 62    | 66       | Community    | Home              | Spouse                            | Never smokers  |
| Breast cancer  | Anderson 2012 | Ontario Women's Diet and Health Study | Case-control        | Canada                     | Female | 25        | 74      | Self-report         | Administrative medical records or disease registries                     | Morbidity             | N/A         | N/A     | N/A    | N/A               | N/A          | 1,827 | 1,913    | Community    | Home; Work        | Family (anyone in household); Any | Never smokers  |
| Breast cancer  | Bonner 2005   | Western New York Exposures and Breast | Case-control        | New York                   | Female | 35        | 79      | Self-report         | Administrative medical records or disease                                | Morbidity             | N/A         | N/A     | N/A    | N/A               | N/A          | 242   | 492      | Community    | Home or work      | Any                               | Never smokers  |

**Table S3. Summary of study characteristics**

| Health outcome | Author-Year             | Study name                                                          | Study design       | Location                                                                                                          | Sex    | Age start | Age end | Exposure assessment | Outcome assessment                                                                   | Endpoint              | Sample size | Exposed | Events | Follow-up (years) | Person-years | Cases | Controls | Control pool | Exposure location | Exposure source | Smoking status                 |  |
|----------------|-------------------------|---------------------------------------------------------------------|--------------------|-------------------------------------------------------------------------------------------------------------------|--------|-----------|---------|---------------------|--------------------------------------------------------------------------------------|-----------------------|-------------|---------|--------|-------------------|--------------|-------|----------|--------------|-------------------|-----------------|--------------------------------|--|
|                |                         | Cancer Study (WEB Study)                                            |                    |                                                                                                                   |        |           |         |                     | registries; Physician diagnosis                                                      |                       |             |         |        |                   |              |       |          |              |                   |                 |                                |  |
| Breast cancer  | Chaveepojnk amjorn 2017 | N/A                                                                 | Case-control       | Thailand                                                                                                          | Female | 25        | 44      | Self-report         | Physician diagnosis; Biomarker                                                       | Morbidity             | N/A         | N/A     | N/A    | N/A               | N/A          | 257   | 257      | Hospital     | Other             | Any             | Any smoking status             |  |
| Breast cancer  | De 2010                 | N/A                                                                 | Case-control       | Sri Lanka                                                                                                         | Female | 30        | 64      | Self-report         | Biomarker; Physician diagnosis; Administrative medical records or disease registries | Morbidity             | N/A         | N/A     | N/A    | N/A               | N/A          | 100   | 203      | Hospital     | Other             | Any             | Never smokers                  |  |
| Breast cancer  | Dianatinasab 2017       | N/A                                                                 | Case-control       | Khuzestan; Kohgiluyeh and Boyer-Ahmad; Bushehr; Fars; Hormozgan                                                   | Female | 18        | 99      | Self-report         | Biomarker                                                                            | Morbidity             | N/A         | N/A     | N/A    | N/A               | N/A          | 526   | 526      | Hospital     | Home              | Parental        | Any smoking status             |  |
| Breast cancer  | Dossus 2014             | European Prospective Investigation into Cancer and Nutrition (EPIC) | Prospective cohort | Sicilia; Toscana; Piemonte; Lombardia; France; Germany; Netherlands; Campania; Denmark; Sweden; Troms og Finnmark | Female | 18        | 99      | Self-report         | Administrative medical records or disease registries; Self-report                    | Incidence & Mortality | 183,608     | N/A     | 3,597  | 11                | N/A          | N/A   | N/A      | N/A          | Home or work      | Any             | Never smokers                  |  |
| Breast cancer  | El-Sheikh 2021          | N/A                                                                 | Case-control       | Egypt                                                                                                             | Female | 19        | 99      | Self-report         | Physician diagnosis; Biomarker                                                       | Morbidity             | N/A         | N/A     | N/A    | N/A               | N/A          | 48    | 42       | Hospital     | Other             | Any             | Non-smokers (former and never) |  |
| Breast cancer  | Fararouei 2019          | N/A                                                                 | Case-control       | Fars                                                                                                              | Female | 20        | 50      | Self-report         | Physician diagnosis; Biomarker                                                       | Morbidity             | N/A         | N/A     | N/A    | N/A               | N/A          | 505   | 505      | Hospital     | Other             | Any             | Any smoking status             |  |
| Breast cancer  | Fu 2015                 | N/A                                                                 | Case-control       | Guangdong                                                                                                         | Female | 18        | 99      | Self-report         | Administrative medical records or                                                    | Morbidity             | N/A         | N/A     | N/A    | N/A               | N/A          | 367   | 419      | Hospital     | Other             | Any             | Any smoking status             |  |

**Table S3. Summary of study characteristics**

| Health outcome | Author-Year       | Study name                                                                                                            | Study design       | Location                   | Sex    | Age start | Age end | Exposure assessment | Outcome assessment                                                       | Endpoint              | Sample size | Exposed | Events | Follow-up (years) | Person-years | Cases | Controls | Control pool | Exposure location | Exposure source              | Smoking status     |
|----------------|-------------------|-----------------------------------------------------------------------------------------------------------------------|--------------------|----------------------------|--------|-----------|---------|---------------------|--------------------------------------------------------------------------|-----------------------|-------------|---------|--------|-------------------|--------------|-------|----------|--------------|-------------------|------------------------------|--------------------|
| Breast cancer  | Gao 2013          | N/A                                                                                                                   | Case-control       | Jiangsu                    | Female | 18        | 99      | Self-report         | disease registries<br>Biomarker; Physician diagnosis                     | Morbidity             | N/A         | N/A     | N/A    | N/A               | N/A          | 630   | 657      | Community    | Home              | Spouse                       | Any smoking status |
| Breast cancer  | Hanaoka 2005      | Japan Public Health Center (JPHC) based prospective study on cancer and cardiovascular diseases (JPHC Study Cohort I) | Prospective cohort | Japan                      | Female | 40        | 59      | Self-report         | Administrative medical records or disease registries; Death certificates | Incidence & Mortality | N/A         | N/A     | 154    | 9.2               | 177,971      | N/A   | N/A      | N/A          | Home              | Family (anyone in household) | Never smokers      |
| Breast cancer  | Hirose 1995       | N/A                                                                                                                   | Case-control       | Aichi                      | Female | 20        | 99      | Self-report         | Administrative medical records or disease registries                     | Morbidity             | N/A         | N/A     | N/A    | N/A               | N/A          | 560   | 11,276   | Hospital     | Home              | Spouse                       | Never smokers      |
| Breast cancer  | Hosseinzadeh 2014 | N/A                                                                                                                   | Case-control       | East Azarbayejan           | Female | 18        | 99      | Self-report         | Biomarker                                                                | Morbidity             | N/A         | N/A     | N/A    | N/A               | N/A          | 140   | 280      | Hospital     | Other             | Any                          | Any smoking status |
| Breast cancer  | Hsieh 2014        | N/A                                                                                                                   | Case-control       | Taiwan (Province of China) | Female | 18        | 99      | Self-report         | Administrative medical records or disease registries; Biomarker          | Morbidity             | N/A         | N/A     | N/A    | N/A               | N/A          | 737   | 719      | Community    | Other             | Any                          | Any smoking status |
| Breast cancer  | Hu 2013           | N/A                                                                                                                   | Case-control       | Hubei                      | Female | 25        | 75      | Self-report         | Biomarker                                                                | Morbidity             | N/A         | N/A     | N/A    | N/A               | N/A          | 211   | 196      | Hospital     | Home or work      | Any                          | Any smoking status |
| Breast cancer  | Ilic 2013         | N/A                                                                                                                   | Case-control       | Serbia                     | Female | 18        | 99      | Self-report         | Biomarker; Physician diagnosis                                           | Morbidity             | N/A         | N/A     | N/A    | N/A               | N/A          | 130   | 124      | Hospital     | Home or work      | Any                          | Never smokers      |
| Breast cancer  | Jee 1999          | N/A                                                                                                                   | Prospective cohort | Republic of Korea          | Female | 40        | 88      | Self-report         | Administrative medical records or disease registries                     | Incidence             | 120,634     | 84,525  | 138    | 3.5               | N/A          | N/A   | N/A      | N/A          | Home              | Spouse                       | Never smokers      |

**Table S3. Summary of study characteristics**

| Health outcome | Author-Year  | Study name                                                            | Study design       | Location                 | Sex    | Age start | Age end | Exposure assessment | Outcome assessment                                                       | Endpoint              | Sample size | Exposed | Events | Follow-up (years) | Person-years | Cases | Controls | Control pool | Exposure location         | Exposure source                   | Smoking status                |
|----------------|--------------|-----------------------------------------------------------------------|--------------------|--------------------------|--------|-----------|---------|---------------------|--------------------------------------------------------------------------|-----------------------|-------------|---------|--------|-------------------|--------------|-------|----------|--------------|---------------------------|-----------------------------------|-------------------------------|
| Breast cancer  | Johnson 2000 | National Enhanced Cancer Surveillance System                          | Case-control       | Canada                   | Female | 25        | 74      | Self-report         | Administrative medical records or disease registries                     | Morbidity             | N/A         | N/A     | N/A    | N/A               | N/A          | 1,261 | 1,362    | Community    | Home or work              | Any                               | Never smokers; Former smokers |
| Breast cancer  | Kariri 2017  | N/A                                                                   | Case-control       | Palestine                | Female | 18        | 60      | Self-report         | Administrative medical records or disease registries                     | Morbidity             | N/A         | N/A     | N/A    | N/A               | N/A          | 105   | 209      | Community    | Other                     | Any                               | Unspecified                   |
| Breast cancer  | Lash 1999    | N/A                                                                   | Case-control       | Massachusetts            | Female | 18        | 99      | Self-report         | Administrative medical records or disease registries                     | Morbidity             | N/A         | N/A     | N/A    | N/A               | N/A          | 120   | 406      | Community    | Home                      | Family (anyone in household)      | Never smokers                 |
| Breast cancer  | Lash 2002    | N/A                                                                   | Case-control       | Massachusetts            | Female | 18        | 99      | Self-report         | Administrative medical records or disease registries                     | Morbidity & Mortality | N/A         | N/A     | N/A    | N/A               | N/A          | 305   | 249      | Community    | Home                      | Family (anyone in household)      | Never smokers                 |
| Breast cancer  | Li 2015      | N/A                                                                   | Case-control       | Guangdong                | Female | 25        | 70      | Self-report         | Physician diagnosis; Biomarker                                           | Morbidity             | N/A         | N/A     | N/A    | N/A               | N/A          | 877   | 890      | Hospital     | Home or work              | Any                               | Never smokers                 |
| Breast cancer  | Lin 2008     | Japan Collaborative Cohort Study for Evaluation of Cancer Risk (JACC) | Prospective cohort | Japan                    | Female | 40        | 79      | Self-report         | Administrative medical records or disease registries; Death certificates | Incidence & Mortality | N/A         | N/A     | 194    | 7.9               | 331,669      | N/A   | N/A      | N/A          | Home                      | Family (anyone in household)      | Never smokers                 |
| Breast cancer  | Liu 2000     | N/A                                                                   | Case-control       | Chongqing                | Female | 24        | 55      | Self-report         | Biomarker; Physician diagnosis                                           | Morbidity             | N/A         | N/A     | N/A    | N/A               | N/A          | 186   | 186      | Hospital     | Home; Work                | Family (anyone in household); Any | Never smokers                 |
| Breast cancer  | Luo 2011     | Women's Health Initiative Observational Study                         | Prospective cohort | United States of America | Female | 50        | 79      | Self-report         | Self-report; Administrative medical records or disease registries        | Incidence             | 45,035      | 33,773  | 958    | 10.3              | N/A          | N/A   | N/A      | N/A          | Home and work; Home; Work | Any; Family (anyone in household) | Never smokers                 |

**Table S3. Summary of study characteristics**

| Health outcome | Author-Year   | Study name                          | Study design       | Location       | Sex    | Age start | Age end | Exposure assessment | Outcome assessment                                                       | Endpoint              | Sample size | Exposed | Events | Follow-up (years) | Person-years | Cases | Controls | Control pool | Exposure location | Exposure source                      | Smoking status     |
|----------------|---------------|-------------------------------------|--------------------|----------------|--------|-----------|---------|---------------------|--------------------------------------------------------------------------|-----------------------|-------------|---------|--------|-------------------|--------------|-------|----------|--------------|-------------------|--------------------------------------|--------------------|
| Breast cancer  | Marzouk 2009  | N/A                                 | Case-control       | Egypt          | Female | 18        | 59      | Self-report         | Physician diagnosis; Biomarker                                           | Morbidity             | N/A         | N/A     | N/A    | N/A               | N/A          | 198   | 153      | Hospital     | Home              | Family (anyone in household)         | Any smoking status |
| Breast cancer  | Metsola 2005  | N/A                                 | Case-control       | Finland        | Female | 37.5      | 91.6    | Self-report         | Physician diagnosis; Biomarker                                           | Morbidity             | N/A         | N/A     | N/A    | N/A               | N/A          | 363   | 351      | Community    | Home or work      | Any                                  | Never smokers      |
| Breast cancer  | Millikan 1998 | Carolina Breast Cancer Study (CBCS) | Case-control       | North Carolina | Female | 20        | 74      | Self-report         | Administrative medical records or disease registries                     | Morbidity             | N/A         | N/A     | N/A    | N/A               | N/A          | 247   | 253      | Community    | Home              | Family (anyone in household)         | Never smokers      |
| Breast cancer  | Morabia 1996  | N/A                                 | Case-control       | Switzerland    | Female | 30        | 74      | Self-report         | Administrative medical records or disease registries; Biomarker          | Morbidity             | N/A         | N/A     | N/A    | N/A               | N/A          | 90    | 455      | Community    | Home              | Spouse                               | Never smokers      |
| Breast cancer  | Niehoff 2017  | N/A                                 | Case-control       | New York       | Female | 20        | 98      | Self-report         | Administrative medical records or disease registries                     | Morbidity             | N/A         | N/A     | N/A    | N/A               | N/A          | 975   | 956      | N/A          | Home              | Spouse                               | Any smoking status |
| Breast cancer  | Nishino 2001  | N/A                                 | Prospective cohort | Miyagi         | Female | 40        | 99      | Self-report         | Administrative medical records or disease registries                     | Incidence             | N/A         | N/A     | 45     | 7.6               | 38,112       | N/A   | N/A      | N/A          | Home              | Family (anyone in household)         | Never smokers      |
| Breast cancer  | Nishino 2014  | N/A                                 | Case-control       | Miyagi         | Female | 30        | 99      | Self-report         | Administrative medical records or disease registries                     | Morbidity             | N/A         | N/A     | N/A    | N/A               | N/A          | 581   | 1,570    | Hospital     | Home              | Spouse                               | Never smokers      |
| Breast cancer  | Pimhanam 2014 | N/A                                 | Case-control       | Thailand       | Female | 17        | 76      | Self-report         | Biomarker                                                                | Morbidity             | N/A         | N/A     | N/A    | N/A               | N/A          | 427   | 429      | Hospital     | Other             | Any                                  | Never smokers      |
| Breast cancer  | Pirie 2008    | Million Women Study                 | Prospective cohort | United Kingdom | Female | 50        | 64      | Self-report         | Administrative medical records or disease registries; Death certificates | Incidence & Mortality | 431,040     | 43,231  | 1,107  | 3.5               | N/A          | N/A   | N/A      | N/A          | Home              | Family (anyone in household); Spouse | Never smokers      |

**Table S3. Summary of study characteristics**

| Health outcome | Author-Year      | Study name                                         | Study design       | Location         | Sex    | Age start | Age end | Exposure assessment | Outcome assessment                                                                    | Endpoint              | Sample size | Exposed | Events | Follow-up (years) | Person-years | Cases | Controls | Control pool | Exposure location         | Exposure source                   | Smoking status                |
|----------------|------------------|----------------------------------------------------|--------------------|------------------|--------|-----------|---------|---------------------|---------------------------------------------------------------------------------------|-----------------------|-------------|---------|--------|-------------------|--------------|-------|----------|--------------|---------------------------|-----------------------------------|-------------------------------|
| Breast cancer  | Reynolds 2009    | California Teacher's Study                         | Prospective cohort | California       | Female | 20        | 99      | Self-report         | Administrative medical records or disease registries; Death certificates; Self-report | Incidence & Mortality | 83,494      | 69,354  | 2,596  | 10                | N/A          | N/A   | N/A      | N/A          | Home; Work                | Family (anyone in household); Any | Never smokers                 |
| Breast cancer  | Roddam 2007      | N/A                                                | Case-control       | England          | Female | 36        | 45      | Self-report         | Administrative medical records or disease registries                                  | Morbidity             | N/A         | N/A     | N/A    | N/A               | N/A          | 570   | 577      | Community    | Home                      | Spouse                            | Never smokers; Former smokers |
| Breast cancer  | Rollison 2008    | N/A                                                | Case-control       | Delaware         | Female | 40        | 79      | Self-report         | Administrative medical records or disease registries                                  | Morbidity             | N/A         | N/A     | N/A    | N/A               | N/A          | 246   | 319      | Community    | Work; Home                | Any; Family (anyone in household) | Never smokers                 |
| Breast cancer  | Shrubsole 2004   | Shanghai Breast Cancer Study (SBCS)                | Case-control       | Shanghai         | Female | 25        | 64      | Self-report         | Administrative medical records or disease registries                                  | Morbidity             | N/A         | N/A     | N/A    | N/A               | N/A          | 1,013 | 1,117    | Community    | Home                      | Spouse                            | Never smokers                 |
| Breast cancer  | Smith 1994       | The UK National Case-Control Study Group (UKNCCSG) | Case-control       | England          | Female | 18        | 35      | Self-report         | Administrative medical records or disease registries                                  | Morbidity             | N/A         | N/A     | N/A    | N/A               | N/A          | 21    | 27       | Community    | Home or work              | Any                               | Never smokers                 |
| Breast cancer  | Strumylaite 2017 | N/A                                                | Case-control       | Lithuania        | Female | 28        | 90      | Self-report         | Physician diagnosis; Biomarker                                                        | Morbidity             | N/A         | N/A     | N/A    | N/A               | N/A          | 901   | 2,066    | Hospital     | Work; Home; Home and work | Any; Family (anyone in household) | Never smokers                 |
| Breast cancer  | Tang 2013        | N/A                                                | Case-control       | Guangdong        | Female | 18        | 99      | Self-report         | Administrative medical records or disease registries                                  | Morbidity             | N/A         | N/A     | N/A    | N/A               | N/A          | 765   | 818      | Hospital     | Home or work              | Any                               | Never smokers                 |
| Breast cancer  | Tong 2014        | N/A                                                | Case-control       | Liaoning         | Female | 18        | 99      | Self-report         | Biomarker                                                                             | Morbidity             | N/A         | N/A     | N/A    | N/A               | N/A          | 312   | 312      | Community    | Home                      | Spouse                            | Never smokers                 |
| Breast cancer  | Wartenberg 2000  | American Cancer Society's                          | Prospective cohort | United States of | Female | 30        | 99      | Self-report         | Self-report; Administrative medical                                                   | Mortality             | 98,693      | 37,883  | 439    | 5.6               | N/A          | N/A   | N/A      | N/A          | Home                      | Spouse                            | Never smokers                 |



**Table S3. Summary of study characteristics**

| Health outcome | Author-Year | Study name                                                               | Study design        | Location                 | Sex    | Age start | Age end | Exposure assessment | Outcome assessment                                                                   | Endpoint              | Sample size | Exposed | Events | Follow-up (years) | Person-years | Cases | Controls | Control pool | Exposure location | Exposure source                   | Smoking status     |
|----------------|-------------|--------------------------------------------------------------------------|---------------------|--------------------------|--------|-----------|---------|---------------------|--------------------------------------------------------------------------------------|-----------------------|-------------|---------|--------|-------------------|--------------|-------|----------|--------------|-------------------|-----------------------------------|--------------------|
|                |             | Cancer Prevention Study II (CPS-II)                                      |                     | America; Puerto Rico     |        |           |         |                     | records or disease registries; Death certificates                                    |                       |             |         |        |                   |              |       |          |              |                   |                                   |                    |
| Breast cancer  | White 2017  | National Institute of Environmental Health Sciences (NIEHS) Sister Study | Prospective cohort  | United States of America | Female | 35        | 74      | Self-report         | Administrative medical records or disease registries; Self-report                    | Incidence             | N/A         | N/A     | 979    | 6.4               | 182,457      | N/A   | N/A      | N/A          | Other             | Any                               | Never smokers      |
| Breast cancer  | Woo 2000    | N/A                                                                      | Nested case-control | Maryland                 | Female | 18        | 99      | Self-report         | Administrative medical records or disease registries                                 | Incidence             | 2,132       | N/A     | N/A    | 17                | N/A          | 706   | 1,426    | Community    | Home              | Family (anyone in household)      | Never smokers      |
| Breast cancer  | Xue 2011    | Nurses' Health Study (NHS)                                               | Prospective cohort  | United States of America | Female | 30        | 55      | Self-report         | Self-report; Administrative medical records or disease registries                    | Incidence & Mortality | N/A         | N/A     | 3,456  | 24.3              | 1,067,588    | N/A   | N/A      | N/A          | Home or work      | Any                               | Never smokers      |
| Breast cancer  | Yassin 2018 | N/A                                                                      | Case-control        | Palestine                | Female | 18        | 99      | Self-report         | Administrative medical records or disease registries                                 | Morbidity             | N/A         | N/A     | N/A    | N/A               | N/A          | 105   | 210      | Community    | Other             | Any                               | Any smoking status |
| Breast cancer  | Zahali 2021 | N/A                                                                      | Case-control        | Malaysia                 | Female | 21        | 59      | Self-report         | Physician diagnosis; Biomarker                                                       | Morbidity             | N/A         | N/A     | N/A    | N/A               | N/A          | 78    | 83       | Hospital     | Home; Work        | Family (anyone in household); Any | Never smokers      |
| Breast cancer  | Zhao 1999   | N/A                                                                      | Case-control        | Sichuan                  | Female | 26        | 82      | Self-report         | Administrative medical records or disease registries; Physician diagnosis; Biomarker | Morbidity             | N/A         | N/A     | N/A    | N/A               | N/A          | 265   | 265      | Hospital     | Other             | Any                               | Unspecified        |

**Table S3. Summary of study characteristics**

| Health outcome                        | Author-Year     | Study name                                                                                   | Study design       | Location                                         | Sex    | Age start | Age end | Exposure assessment | Outcome assessment                                                                   | Endpoint  | Sample size | Exposed | Events | Follow-up (years) | Person-years | Cases | Controls | Control pool | Exposure location | Exposure source                   | Smoking status                 |
|---------------------------------------|-----------------|----------------------------------------------------------------------------------------------|--------------------|--------------------------------------------------|--------|-----------|---------|---------------------|--------------------------------------------------------------------------------------|-----------|-------------|---------|--------|-------------------|--------------|-------|----------|--------------|-------------------|-----------------------------------|--------------------------------|
| Chronic obstructive pulmonary disease | Behrendt 2005   | Third National Health and Nutrition Examination Survey                                       | Case-control       | United States of America                         | Both   | 18        | 80      | Self-report         | Biomarker; Administrative medical records or disease registries; Physician diagnosis | Morbidity | N/A         | N/A     | N/A    | N/A               | N/A          | 397   | 6,922    | Community    | Home; Work        | Family (anyone in household); Any | Non-smokers (former and never) |
| Chronic obstructive pulmonary disease | Chan-Yeung 2007 | N/A                                                                                          | Case-control       | Hong Kong Special Administrative Region of China | Both   | 18        | 99      | Self-report         | Physician diagnosis; Administrative medical records or disease registries; Biomarker | Morbidity | N/A         | N/A     | N/A    | N/A               | N/A          | 289   | 289      | Community    | Home or work      | Any                               | Any smoking status             |
| Chronic obstructive pulmonary disease | Chen 2013       | N/A                                                                                          | Case-control       | Fujian                                           | Both   | 27        | 85      | Self-report         | Biomarker                                                                            | Morbidity | N/A         | N/A     | N/A    | N/A               | N/A          | 216   | 432      | Community    | Other             | Any                               | Any smoking status             |
| Chronic obstructive pulmonary disease | David 2005      | Singapore Chinese Health Study                                                               | Prospective cohort | Singapore                                        | Both   | 45        | 74      | Self-report         | Self-report                                                                          | Incidence | 31,142      | 29,324  | 149    | 5.8               | N/A          | N/A   | N/A      | N/A          | Home; Work        | Family (anyone in household); Any | Never smokers                  |
| Chronic obstructive pulmonary disease | Dennis 1996     | N/A                                                                                          | Case-control       | Colombia                                         | Female | 35        | 99      | Self-report         | Physician diagnosis; Biomarker                                                       | Morbidity | N/A         | N/A     | N/A    | N/A               | N/A          | 96    | 88       | Hospital     | Home              | Spouse                            | Any smoking status             |
| Chronic obstructive pulmonary disease | Ding 2015       | N/A                                                                                          | Case-control       | Hainan                                           | Both   | 32        | 98      | Self-report         | Biomarker                                                                            | Morbidity | N/A         | N/A     | N/A    | N/A               | N/A          | 277   | 307      | Community    | Other             | Any                               | Any smoking status             |
| Chronic obstructive pulmonary disease | Diver 2018      | The American Cancer Society's Cancer Prevention Study-II Nutrition Cohort (CPS-II Nutrition) | Prospective cohort | United States of America                         | Both   | 50        | 74      | Self-report         | Administrative medical records or disease registries                                 | Mortality | N/A         | N/A     | 235    | 18.8              | 888,879      | N/A   | N/A      | N/A          | Home              | Family (anyone in household)      | Never smokers                  |

**Table S3. Summary of study characteristics**

| Health outcome                        | Author-Year      | Study name                                                                                  | Study design       | Location                   | Sex  | Age start | Age end | Exposure assessment | Outcome assessment                                                                   | Endpoint  | Sample size | Exposed | Events | Follow-up (years) | Person-years | Cases | Controls | Control pool | Exposure location | Exposure source                   | Smoking status     |
|---------------------------------------|------------------|---------------------------------------------------------------------------------------------|--------------------|----------------------------|------|-----------|---------|---------------------|--------------------------------------------------------------------------------------|-----------|-------------|---------|--------|-------------------|--------------|-------|----------|--------------|-------------------|-----------------------------------|--------------------|
| Chronic obstructive pulmonary disease | Enstrom 2003     | CPS I (California cancer prevention study; American Cancer Society cancer prevention study) | Prospective cohort | California                 | Both | 30        | 96      | Self-report         | Administrative medical records or disease registries; Death certificates             | Mortality | 2,459       | 1,1/5   | 209    | 39                | N/A          | N/A   | N/A      | N/A          | Home              | Spouse                            | Never smokers      |
| Chronic obstructive pulmonary disease | Gerbase 2006     | Swiss Study on Air Pollution and Lung Diseases in Adults (SAPALDIA)                         | Prospective cohort | Switzerland                | Both | 18        | 60      | Self-report         | Self-report; Biomarker                                                               | Incidence | 1,511       | 309     | 54     | 11                | N/A          | N/A   | N/A      | N/A          | Other             | Any                               | Never smokers      |
| Chronic obstructive pulmonary disease | He 2012          | N/A                                                                                         | Prospective cohort | Shaanxi                    | Both | 51.5      | 87.8    | Self-report         | Death certificates; Administrative medical records or disease registries             | Mortality | 910         | 611     | 36     | 15.4              | N/A          | N/A   | N/A      | N/A          | Home or work      | Any                               | Never smokers      |
| Chronic obstructive pulmonary disease | Huang 2019       | N/A                                                                                         | Case-control       | Taiwan (Province of China) | Both | 18        | 99      | Self-report         | Administrative medical records or disease registries                                 | Morbidity | N/A         | N/A     | N/A    | N/A               | N/A          | 791   | 3,150    | Community    | Other             | Any                               | Never smokers      |
| Chronic obstructive pulmonary disease | Johannessen 2012 | Bergen COPD Cohort Study                                                                    | Case-control       | Vestland                   | Both | 40        | 79      | Self-report         | Physician diagnosis; Administrative medical records or disease registries; Biomarker | Morbidity | N/A         | N/A     | N/A    | N/A               | N/A          | N/A   | N/A      | Community    | Work; Home        | Any; Family (anyone in household) | Any smoking status |
| Chronic obstructive pulmonary disease | Lee 1986         | N/A                                                                                         | Case-control       | England                    | Both | 35        | 74      | Self-report         | Physician diagnosis; Administrative medical records or                               | Morbidity | N/A         | N/A     | N/A    | N/A               | N/A          | 14    | 269      | Hospital     | Home              | Spouse                            | Never smokers      |

**Table S3. Summary of study characteristics**

| Health outcome                        | Author-Year  | Study name                                                                   | Study design        | Location                                             | Sex    | Age start | Age end | Exposure assessment | Outcome assessment                                                | Endpoint  | Sample size | Exposed | Events | Follow-up (years) | Person-years | Cases | Controls | Control pool | Exposure location | Exposure source                   | Smoking status                 |
|---------------------------------------|--------------|------------------------------------------------------------------------------|---------------------|------------------------------------------------------|--------|-----------|---------|---------------------|-------------------------------------------------------------------|-----------|-------------|---------|--------|-------------------|--------------|-------|----------|--------------|-------------------|-----------------------------------|--------------------------------|
|                                       |              |                                                                              |                     |                                                      |        |           |         |                     | disease registries                                                |           |             |         |        |                   |              |       |          |              |                   |                                   |                                |
| Chronic obstructive pulmonary disease | McGhee 2005  | N/A                                                                          | Case-control        | Hong Kong Special Administrative Region of China     | Both   | 60        | 99      | Proxy respondent    | Death certificates                                                | Mortality | N/A         | N/A     | N/A    | N/A               | N/A          | 138   | 763      | Community    | Home              | Family (anyone in household)      | Never smokers                  |
| Chronic obstructive pulmonary disease | Pahwa 2019   | Saskatchewan Rural Health Study                                              | Prospective cohort  | Canada                                               | Both   | 18        | 99      | Self-report         | Self-report                                                       | Incidence | 8,109       | 1,228   | 479    | 4                 | N/A          | N/A   | N/A      | N/A          | Home              | Family (anyone in household)      | Any smoking status             |
| Chronic obstructive pulmonary disease | Salama 2020  | N/A                                                                          | Case-control        | Saudi Arabia                                         | Both   | 19        | 99      | Self-report         | Physician diagnosis; Biomarker                                    | Morbidity | N/A         | N/A     | N/A    | N/A               | N/A          | 157   | 157      | Hospital     | Other             | Any                               | Any smoking status             |
| Chronic obstructive pulmonary disease | Salameh 2012 | N/A                                                                          | Case-control        | Lebanon                                              | Both   | 40        | 99      | Self-report         | Physician diagnosis                                               | Morbidity | N/A         | N/A     | N/A    | N/A               | N/A          | 248   | 348      | Community    | Work; Home        | Any; Family (anyone in household) | Any smoking status             |
| Chronic obstructive pulmonary disease | Sandler 1989 | N/A                                                                          | Prospective cohort  | Maryland                                             | Both   | 25        | 99      | Self-report         | Death certificates                                                | Mortality | 19,035      | 10,799  | 19     | 10                | 189,597      | N/A   | N/A      | N/A          | Home              | Family (anyone in household)      | Never smokers                  |
| Chronic obstructive pulmonary disease | Vineis 2005  | European prospective investigation into cancer and nutrition (EPIC) - GenAir | Nested case-control | France; Italy; Denmark; Sweden; Netherlands; Germany | Both   | 35        | 74      | Self-report         | Administrative medical records or disease registries; Self-report | Mortality | 300         | N/A     | N/A    | N/A               | N/A          | 14    | 286      | Community    | Home or work      | Any                               | Non-smokers (former and never) |
| Chronic obstructive pulmonary disease | Wu 2010      | N/A                                                                          | Case-control        | Taiwan (Province of China)                           | Female | 40        | 99      | Self-report         | Administrative medical records or disease registries; Biomarker   | Morbidity | N/A         | N/A     | N/A    | N/A               | N/A          | 127   | 133      | Community    | Home or work      | Any                               | Non-smokers (former and never) |
| Chronic obstructive pulmonary disease | Xu 2007      | N/A                                                                          | Nested case-control | Jiangsu                                              | Both   | 35        | 99      | Self-report         | Self-report; Administrative medical records or                    | Incidence | 1,769       | N/A     | N/A    | N/A               | N/A          | 879   | 890      | Community    | Other             | Any                               | Any smoking status             |

**Table S3. Summary of study characteristics**

| Health outcome           | Author-Year    | Study name                                                                            | Study design         | Location          | Sex    | Age start | Age end | Exposure assessment    | Outcome assessment                                                           | Endpoint  | Sample size | Exposed | Events | Follow-up (years) | Person-years | Cases | Controls | Control pool | Exposure location | Exposure source                   | Smoking status                 |
|--------------------------|----------------|---------------------------------------------------------------------------------------|----------------------|-------------------|--------|-----------|---------|------------------------|------------------------------------------------------------------------------|-----------|-------------|---------|--------|-------------------|--------------|-------|----------|--------------|-------------------|-----------------------------------|--------------------------------|
| Diabetes mellitus type 2 | Hayashino 2008 | High Risk and Population Strategy for Occupational Health Promotion Study (HIPOP-OHP) | Prospective cohort   | Japan             | Both   | 19        | 69      | Self-report            | Biomarker; Administrative medical records or disease registries; Self-report | Incidence | 2,819       | 690     | 819    | 3.4               | N/A          | N/A   | N/A      | N/A          | Work; Home        | Any; Family (anyone in household) | Non-smokers (former and never) |
| Diabetes mellitus type 2 | Huang 2020     | China Kadoorie Biobank (CKB) cohort study                                             | Prospective cohort   | Jiangsu           | Female | 30        | 79      | Self-report            | Administrative medical records or disease registries; Biomarker; Self-report | Incidence | 28,177      | 19,391  | 774    | 7.2               | 202,746      | N/A   | N/A      | N/A          | Other             | Any                               | Never smokers                  |
| Diabetes mellitus type 2 | Jiang 2019     | California Teacher Study (CTS)                                                        | Prospective cohort   | California        | Female | 20        | 79      | Self-report            | Self-report                                                                  | Incidence | 37,447      | 14,065  | 2,315  | 17                | N/A          | N/A   | N/A      | N/A          | Home              | Family (anyone in household)      | Never smokers                  |
| Diabetes mellitus type 2 | Kim 2021       | Kangbuk Samsung Health Study                                                          | Retrospective cohort | Republic of Korea | Both   | 18        | 99      | Self-report; Biomarker | Biomarker; Self-report                                                       | Incidence | 131,724     | 30,223  | 2,115  | 14                | N/A          | N/A   | N/A      | N/A          | Home or work      | Any                               | Never smokers                  |
| Diabetes mellitus type 2 | Kowall 2010    | KORA (Cooperative Health Research in the Region of Augsburg) S4 survey                | Prospective cohort   | Germany           | Both   | 55        | 74      | Self-report            | Self-report; Biomarker                                                       | Incidence | 861         | 161     | 35     | 7                 | N/A          | N/A   | N/A      | N/A          | Home or work      | Any                               | Never smokers; Former smokers  |
| Diabetes mellitus type 2 | Oba 2020       | Japan Public Health Center-based Prospective Study (JPHC Study)                       | Prospective cohort   | Japan             | Female | 40        | 69      | Self-report            | Self-report                                                                  | Incidence | 19,001      | 12,432  | N/A    | 10                | N/A          | N/A   | N/A      | N/A          | Home              | Spouse                            | Never smokers                  |
| Diabetes mellitus type 2 | Rias 2020      | N/A                                                                                   | Case-control         | East Java         | Both   | 18        | 75      | Self-report            | Biomarker; Physician diagnosis                                               | Morbidity | N/A         | N/A     | N/A    | N/A               | N/A          | 261   | 277      | Community    | Other             | Any                               | Never smokers                  |

**Table S3. Summary of study characteristics**

| Health outcome           | Author-Year  | Study name                                                                                   | Study design       | Location                                         | Sex    | Age start | Age end | Exposure assessment | Outcome assessment                                              | Endpoint  | Sample size | Exposed | Events | Follow-up (years) | Person-years | Cases | Controls | Control pool | Exposure location | Exposure source              | Smoking status                 |
|--------------------------|--------------|----------------------------------------------------------------------------------------------|--------------------|--------------------------------------------------|--------|-----------|---------|---------------------|-----------------------------------------------------------------|-----------|-------------|---------|--------|-------------------|--------------|-------|----------|--------------|-------------------|------------------------------|--------------------------------|
| Diabetes mellitus type 2 | Zeng 2022    | N/A                                                                                          | Case-control       | Jiangxi                                          | Female | 25        | 95      | Self-report         | Self-report; Biomarker                                          | Morbidity | N/A         | N/A     | N/A    | N/A               | N/A          | 79    | 81       | Community    | Other             | Any                          | Non-smokers (former and never) |
| Diabetes mellitus type 2 | Zhang 2011   | Nurses' Health Study (NHS)                                                                   | Prospective cohort | United States of America                         | Female | 41        | 55      | Self-report         | Self-report                                                     | Incidence | N/A         | N/A     | 2,161  | 15.3              | 663,594      | N/A   | N/A      | N/A          | Other             | Any                          | Never smokers                  |
| Ischemic heart disease   | Attard 2017  | Maltese Acute Myocardial Infarction Study (MAMI)                                             | Case-control       | Malta                                            | Both   | 20        | 77      | Self-report         | Administrative medical records or disease registries            | Morbidity | N/A         | N/A     | N/A    | N/A               | N/A          | 12    | 10       | Community    | Home              | Family (anyone in household) | Non-smokers (former and never) |
| Ischemic heart disease   | Awawdi 2016  | N/A                                                                                          | Case-control       | Israel                                           | Female | 35        | 70      | Self-report         | Physician diagnosis                                             | Morbidity | N/A         | N/A     | N/A    | N/A               | N/A          | 19    | 11       | Community    | Home              | Spouse                       | Never smokers                  |
| Ischemic heart disease   | Ciruzzi 1998 | Factores de Riesgo Coronario en America del Sur (FRICAS)                                     | Case-control       | Argentina                                        | Both   | 24        | 83      | Self-report         | Administrative medical records or disease registries; Biomarker | Morbidity | N/A         | N/A     | N/A    | N/A               | N/A          | 131   | 117      | Hospital     | Home              | Family (anyone in household) | Never smokers                  |
| Ischemic heart disease   | Clark 2013   | Singapore Chinese Health Study                                                               | Prospective cohort | Singapore                                        | Both   | 45        | 74      | Self-report         | Administrative medical records or disease registries            | Mortality | N/A         | N/A     | 311    | 5.5               | 161,425      | N/A   | N/A      | N/A          | Home or work      | Any                          | Never smokers                  |
| Ischemic heart disease   | Ding 2009    | N/A                                                                                          | Case-control       | Hong Kong Special Administrative Region of China | Female | 18        | 99      | Self-report         | Administrative medical records or disease registries; Biomarker | Morbidity | N/A         | N/A     | N/A    | N/A               | N/A          | 95    | 65       | Hospital     | Home              | Family (anyone in household) | Never smokers                  |
| Ischemic heart disease   | Diver 2018   | The American Cancer Society's Cancer Prevention Study-II Nutrition Cohort (CPS-II Nutrition) | Prospective cohort | United States of America                         | Both   | 50        | 74      | Self-report         | Administrative medical records or disease registries            | Mortality | N/A         | N/A     | 2,939  | 18.8              | 888,879      | N/A   | N/A      | N/A          | Home              | Family (anyone in household) | Never smokers                  |

**Table S3. Summary of study characteristics**

| Health outcome         | Author-Year  | Study name                                                          | Study design       | Location                                            | Sex    | Age start | Age end | Exposure assessment    | Outcome assessment                                                                    | Endpoint              | Sample size | Exposed | Events | Follow-up (years) | Person-years | Cases | Controls | Control pool | Exposure location | Exposure source                   | Smoking status                |
|------------------------|--------------|---------------------------------------------------------------------|--------------------|-----------------------------------------------------|--------|-----------|---------|------------------------|---------------------------------------------------------------------------------------|-----------------------|-------------|---------|--------|-------------------|--------------|-------|----------|--------------|-------------------|-----------------------------------|-------------------------------|
| Ischemic heart disease | Dobson 1991  | N/A                                                                 | Case-control       | Australia                                           | Both   | 35        | 69      | Self-report            | Administrative medical records or disease registries                                  | Morbidity & Mortality | N/A         | N/A     | N/A    | N/A               | N/A          | 960   | 1,944    | Community    | Home; Work        | Family (anyone in household); Any | Never smokers; Former smokers |
| Ischemic heart disease | Enstrom 2003 | CPS-I (California cancer prevention study)                          | Prospective cohort | California                                          | Both   | 30        | 96      | Self-report            | Administrative medical records or disease registries; Death certificates              | Mortality             | 28,079      | 13,222  | 4,747  | 38                | N/A          | N/A   | N/A      | N/A          | Home              | Spouse                            | Never smokers                 |
| Ischemic heart disease | Fatmi 2014   | N/A                                                                 | Case-control       | Pakistan                                            | Female | 0         | 99      | Self-report            | Physician diagnosis                                                                   | Morbidity             | N/A         | N/A     | N/A    | N/A               | N/A          | 73    | 73       | Hospital     | Home              | Any                               | Any smoking status            |
| Ischemic heart disease | Gallo 2010   | European Prospective Investigation into Cancer and Nutrition (EPIC) | Prospective cohort | France; Italy; Netherlands; Sweden; Denmark; Norway | Both   | 18        | 99      | Self-report; Biomarker | Death certificates                                                                    | Mortality             | 69,870      | 22,758  | 81     | 9.9               | N/A          | N/A   | N/A      | N/A          | Home              | Family (anyone in household)      | Never smokers                 |
| Ischemic heart disease | Garland 1985 | N/A                                                                 | Prospective cohort | California                                          | Female | 50        | 79      | Self-report            | Death certificates; Administrative medical records or disease registries; Self-report | Mortality             | 300         | 97      | 4      | 10                | N/A          | N/A   | N/A      | N/A          | Home              | Spouse                            | Never smokers                 |
| Ischemic heart disease | He 1994      | N/A                                                                 | Case-control       | Shaanxi                                             | Female | 37        | 67      | Self-report            | Physician diagnosis; Biomarker; Administrative medical records or disease registries  | Morbidity             | N/A         | N/A     | N/A    | N/A               | N/A          | 48    | 76       | Hospital     | Home or work      | Any                               | Never smokers                 |
| Ischemic heart disease | He 2012      | N/A                                                                 | Prospective cohort | Shaanxi                                             | Both   | 51.5      | 87.8    | Self-report            | Death certificates; Administrative medical records or disease                         | Mortality             | 910         | 611     | 41     | 15.4              | N/A          | N/A   | N/A      | N/A          | Home or work      | Any                               | Never smokers                 |

**Table S3. Summary of study characteristics**

| Health outcome         | Author-Year      | Study name                                                  | Study design        | Location                 | Sex    | Age start | Age end | Exposure assessment | Outcome assessment                                                        | Endpoint              | Sample size | Exposed | Events | Follow-up (years) | Person-years | Cases | Controls | Control pool | Exposure location | Exposure source              | Smoking status                 |
|------------------------|------------------|-------------------------------------------------------------|---------------------|--------------------------|--------|-----------|---------|---------------------|---------------------------------------------------------------------------|-----------------------|-------------|---------|--------|-------------------|--------------|-------|----------|--------------|-------------------|------------------------------|--------------------------------|
| Ischemic heart disease | Hill 2007        | New Zealand Census-Mortality Study                          | Prospective cohort  | New Zealand              | Both   | 45        | 74      | Self-report         | registries; Biomarker<br>Death certificates                               | Mortality             | 668,259     | 121,812 | 4,251  | 3                 | 1,983,184    | N/A   | N/A      | N/A          | Home              | Family (anyone in household) | Never smokers                  |
| Ischemic heart disease | Hole 1989        | N/A                                                         | Prospective cohort  | Scotland                 | Both   | 45        | 64      | Self-report         | Administrative medical records or disease registries; Death certificates  | Mortality             | 2,455       | 1,538   | 84     | 11.5              | N/A          | N/A   | N/A      | N/A          | Home              | Family (anyone in household) | Never smokers                  |
| Ischemic heart disease | Janghorbani 1997 | N/A                                                         | Case-control        | Kerman                   | Female | 42        | 85      | Self-report         | Physician diagnosis                                                       | Morbidity             | N/A         | N/A     | N/A    | N/A               | N/A          | 200   | 400      | Hospital     | Home              | Family (anyone in household) | Never smokers                  |
| Ischemic heart disease | Kastorini 2013   | N/A                                                         | Case-control        | Greece                   | Both   | 18        | 99      | Self-report         | Administrative medical records or disease registries; Physician diagnosis | Morbidity             | N/A         | N/A     | N/A    | N/A               | N/A          | 32    | 37       | Community    | Other             | Any                          | Non-smokers (former and never) |
| Ischemic heart disease | Kawachi 1997     | Nurses' Health Study cohort                                 | Prospective cohort  | United States of America | Female | 30        | 55      | Self-report         | Administrative medical records or disease registries; Death certificates  | Incidence & Mortality | N/A         | N/A     | 152    | 9.4               | 302,325      | N/A   | N/A      | N/A          | Home or work      | Any                          | Never smokers                  |
| Ischemic heart disease | Kobayashi 2022   | N/A                                                         | Prospective cohort  | Japan                    | Female | 40        | 59      | Self-report         | Administrative medical records or disease registries                      | Incidence             | 22,445      | 11,239  | 62     | 18.1              | 431,721      | N/A   | N/A      | N/A          | Other             | Spouse                       | Never smokers                  |
| Ischemic heart disease | La 1993          | GISSI-2 (Gruppo Italiano per lo Studio della Sopravvivenza) | Nested case-control | Italy                    | Both   | 29        | 74      | Self-report         | Physician diagnosis; Administrative medical records or                    | Incidence             | 61          | N/A     | N/A    | N/A               | N/A          | 24    | 37       | Hospital     | Home              | Spouse                       | Never smokers                  |



**Table S3. Summary of study characteristics**

| Health outcome         | Author-Year        | Study name                   | Study design       | Location                                         | Sex    | Age start | Age end | Exposure assessment | Outcome assessment                                                                    | Endpoint              | Sample size | Exposed | Events | Follow-up (years) | Person-years | Cases | Controls | Control pool | Exposure location | Exposure source                   | Smoking status                 |
|------------------------|--------------------|------------------------------|--------------------|--------------------------------------------------|--------|-----------|---------|---------------------|---------------------------------------------------------------------------------------|-----------------------|-------------|---------|--------|-------------------|--------------|-------|----------|--------------|-------------------|-----------------------------------|--------------------------------|
|                        |                    | anelli-intarato (Miocardico) |                    |                                                  |        |           |         |                     | disease registries                                                                    |                       |             |         |        |                   |              |       |          |              |                   |                                   |                                |
| Ischemic heart disease | Lee 1986           | N/A                          | Case-control       | England                                          | Both   | 35        | 74      | Self-report         | Physician diagnosis; Administrative medical records or disease registries             | Morbidity             | N/A         | N/A     | N/A    | N/A               | N/A          | 70    | 269      | Hospital     | Home              | Spouse                            | Never smokers                  |
| Ischemic heart disease | Malinauskienė 2011 | N/A                          | Case-control       | Lithuania                                        | Female | 35        | 61      | Self-report         | Administrative medical records or disease registries                                  | Morbidity             | N/A         | N/A     | N/A    | N/A               | N/A          | 58    | 100      | Community    | Other             | Any                               | Never smokers                  |
| Ischemic heart disease | McElduff 1998      | WHO MONICA study             | Case-control       | Australia; New Zealand                           | Both   | 35        | 69      | Self-report         | Administrative medical records or disease registries; Self-report; Death certificates | Morbidity & Mortality | N/A         | N/A     | N/A    | N/A               | N/A          | 186   | 844      | Community    | Home or work      | Any                               | Non-smokers (former and never) |
| Ischemic heart disease | McGhee 2005        | N/A                          | Case-control       | Hong Kong Special Administrative Region of China | Both   | 60        | 99      | Proxy respondent    | Death certificates                                                                    | Mortality             | N/A         | N/A     | N/A    | N/A               | N/A          | 584   | 763      | Community    | Home              | Family (anyone in household)      | Never smokers                  |
| Ischemic heart disease | Muscat 1995        | N/A                          | Case-control       | New York; Pennsylvania; Michigan; Illinois       | Both   | 18        | 74      | Self-report         | Administrative medical records or disease registries; Physician diagnosis; Biomarker  | Morbidity             | N/A         | N/A     | N/A    | N/A               | N/A          | 64    | 88       | Hospital     | Work              | Any                               | Never smokers                  |
| Ischemic heart disease | Nishtar 2004       | N/A                          | Case-control       | Pakistan                                         | Both   | 39        | 67      | Self-report         | Physician diagnosis                                                                   | Morbidity             | N/A         | N/A     | N/A    | N/A               | N/A          | 200   | 200      | Hospital     | Home              | Family (anyone in household)      | Any smoking status             |
| Ischemic heart disease | Notara 2015        | GRECS (GREEK acute cohort)   | Prospective cohort | Greece                                           | Both   | 18        | 99      | Self-report         | Physician diagnosis                                                                   | Incidence & Mortality | N/A         | N/A     | N/A    | 10                | N/A          | N/A   | N/A      | N/A          | Work; Home        | Any; Family (anyone in household) | Unspecified                    |

**Table S3. Summary of study characteristics**

| Health outcome         | Author-Year    | Study name                                   | Study design       | Location                 | Sex    | Age start | Age end | Exposure assessment | Outcome assessment                                                        | Endpoint              | Sample size | Exposed | Events | Follow-up (years) | Person-years | Cases | Controls | Control pool | Exposure location | Exposure source                   | Smoking status                 |
|------------------------|----------------|----------------------------------------------|--------------------|--------------------------|--------|-----------|---------|---------------------|---------------------------------------------------------------------------|-----------------------|-------------|---------|--------|-------------------|--------------|-------|----------|--------------|-------------------|-----------------------------------|--------------------------------|
|                        |                | Coronary Syndrome)                           |                    |                          |        |           |         |                     |                                                                           |                       |             |         |        |                   |              |       |          |              |                   |                                   |                                |
| Ischemic heart disease | Pitsavos 2002  | Cardio2000                                   | Case-control       | Greece                   | Both   | 18        | 99      | Self-report         | Biomarker; Administrative medical records or disease registries           | Morbidity             | N/A         | N/A     | N/A    | N/A               | N/A          | N/A   | N/A      | Community    | Home or work      | Any                               | Never smokers                  |
| Ischemic heart disease | Rashid 2019    | N/A                                          | Case-control       | Malaysia                 | Female | 30        | 65      | Self-report         | Physician diagnosis; Administrative medical records or disease registries | Morbidity             | N/A         | N/A     | N/A    | N/A               | N/A          | 91    | 53       | Community    | Home or work      | Any                               | Unspecified                    |
| Ischemic heart disease | Rosenlund 2001 | Stockholm Heart Epidemiology Program (SHEEP) | Case-control       | Sweden                   | Both   | 45        | 70      | Self-report         | Administrative medical records or disease registries                      | Morbidity             | N/A         | N/A     | N/A    | N/A               | N/A          | 113   | 196      | Community    | Home; Work        | Spouse; Any                       | Never smokers                  |
| Ischemic heart disease | Rossi 2011     | N/A                                          | Case-control       | Costa Rica               | Both   | 18        | 99      | Self-report         | Physician diagnosis; Biomarker                                            | Morbidity             | N/A         | N/A     | N/A    | N/A               | N/A          | N/A   | N/A      | Community    | Home              | Family (anyone in household)      | Non-smokers (former and never) |
| Ischemic heart disease | Sadeghi 2020   | Tehran Lipid and Glucose Study (TLGS)        | Prospective cohort | Tehran                   | Both   | 30        | 99      | Self-report         | Self-report; Administrative medical records or disease registries         | Incidence & Mortality | 6,003       | 1,791   | 720    | 14.7              | N/A          | N/A   | N/A      | N/A          | Home or work      | Any                               | Never smokers                  |
| Ischemic heart disease | Sandler 1989   | N/A                                          | Prospective cohort | Maryland                 | Both   | 25        | 99      | Self-report         | Death certificates                                                        | Mortality             | 19,035      | 10,799  | 1,358  | 10                | 189,597      | N/A   | N/A      | N/A          | Home              | Family (anyone in household)      | Never smokers                  |
| Ischemic heart disease | Spencer 1999   | N/A                                          | Case-control       | Australia                | Male   | 25        | 69      | Self-report         | Administrative medical records or disease registries                      | Morbidity             | N/A         | N/A     | N/A    | N/A               | N/A          | 310   | 816      | Community    | Home; Work        | Family (anyone in household); Any | Any smoking status             |
| Ischemic heart disease | Steenland 1996 | American Cancer Society's Cancer             | Prospective cohort | United States of America | Both   | 30        | 99      | Self-report         | Administrative medical records or disease                                 | Mortality             | 135,217     | N/A     | 1,606  | 7                 | N/A          | N/A   | N/A      | N/A          | Home              | Spouse                            | Never smokers                  |

**Table S3. Summary of study characteristics**

| Health outcome               | Author-Year    | Study name                                                        | Study design       | Location                 | Sex  | Age start | Age end | Exposure assessment | Outcome assessment                                                                            | Endpoint              | Sample size | Exposed | Events | Follow-up (years) | Person-years | Cases | Controls | Control pool | Exposure location | Exposure source              | Smoking status                 |
|------------------------------|----------------|-------------------------------------------------------------------|--------------------|--------------------------|------|-----------|---------|---------------------|-----------------------------------------------------------------------------------------------|-----------------------|-------------|---------|--------|-------------------|--------------|-------|----------|--------------|-------------------|------------------------------|--------------------------------|
|                              |                | Prevention Study II (CPS-II)                                      |                    |                          |      |           |         |                     | registries; Death certificates                                                                |                       |             |         |        |                   |              |       |          |              |                   |                              |                                |
| Ischemic heart disease       | Sulo 2008      | N/A                                                               | Case-control       | Albania                  | Both | 35        | 74      | Self-report         | Biomarker; Administrative medical records or disease registries                               | Morbidity             | N/A         | N/A     | N/A    | N/A               | N/A          | 141   | 333      | Community    | Home              | Spouse                       | Never smokers                  |
| Ischemic heart disease       | Svensden 1987  | Multiple Risk Factor Intervention Trial (MRFIT)                   | Prospective cohort | United States of America | Male | 35        | 57      | Self-report         | Administrative medical records or disease registries; Physician diagnosis; Death certificates | Incidence & Mortality | 1,245       | 286     | 69     | 7                 | N/A          | N/A   | N/A      | N/A          | Home              | Spouse                       | Never smokers                  |
| Ischemic stroke              | Kastorini 2013 | N/A                                                               | Case-control       | Greece                   | Both | 18        | 99      | Self-report         | Administrative medical records or disease registries; Physician diagnosis                     | Morbidity             | N/A         | N/A     | N/A    | N/A               | N/A          | 38    | 51       | Community    | Other             | Any                          | Non-smokers (former and never) |
| Ischemic stroke              | You 1999       | N/A                                                               | Case-control       | Australia                | Both | 18        | 99      | Self-report         | Physician diagnosis; Biomarker                                                                | Morbidity             | N/A         | N/A     | N/A    | N/A               | N/A          | 73    | 70       | Community    | Home              | Spouse                       | Never smokers                  |
| Lower respiratory infections | Almirall 2014  | Community-acquired pneumonia in Health Care Centres (PACAP) study | Case-control       | Spain                    | Both | 14        | 100     | Self-report         | Physician diagnosis; Biomarker                                                                | Morbidity             | N/A         | N/A     | N/A    | N/A               | N/A          | 471   | 532      | Community    | Home              | Family (anyone in household) | Never smokers                  |
| Lower respiratory infections | Arlington 2019 | Global Network for Women's and Children's Health Research MNH     | Prospective cohort | Maharashtra              | Both | 0         | 0       | Self-report         | Self-report                                                                                   | Incidence             | 1,586       | 302     | 302    | 0.5               | N/A          | N/A   | N/A      | N/A          | Home              | Family (anyone in household) | Never smokers                  |

**Table S3. Summary of study characteristics**

| Health outcome               | Author-Year    | Study name                   | Study design       | Location       | Sex  | Age start | Age end | Exposure assessment | Outcome assessment                                                | Endpoint  | Sample size | Exposed | Events | Follow-up (years) | Person-years | Cases | Controls | Control pool | Exposure location | Exposure source                     | Smoking status |
|------------------------------|----------------|------------------------------|--------------------|----------------|------|-----------|---------|---------------------|-------------------------------------------------------------------|-----------|-------------|---------|--------|-------------------|--------------|-------|----------|--------------|-------------------|-------------------------------------|----------------|
|                              |                | Registry Study               |                    |                |      |           |         |                     |                                                                   |           |             |         |        |                   |              |       |          |              |                   |                                     |                |
| Lower respiratory infections | Baker 2006     | immune biomarker study (IBS) | Prospective cohort | Czechia        | Both | 0         | 0       | Self-report         | Administrative medical records or disease registries              | Incidence | N/A         | N/A     | 890    | 1.7               | 1,295        | N/A   | N/A      | N/A          | Home              | Other family (not spouse)           | Never smokers  |
| Lower respiratory infections | Barsam 2013    | N/A                          | Case-control       | Minas Gerais   | Both | 0.5       | 13      | Self-report         | Physician diagnosis; Biomarker                                    | Morbidity | N/A         | N/A     | N/A    | N/A               | N/A          | 126   | 126      | Hospital     | Home              | Family (anyone in household)        | Never smokers  |
| Lower respiratory infections | Behrooz 2018   | N/A                          | Case-control       | Massachusetts  | Both | 0         | 0.999   | Self-report         | Administrative medical records or disease registries              | Morbidity | N/A         | N/A     | N/A    | N/A               | N/A          | 550   | 391      | Hospital     | Home              | Family (anyone in household)        | Never smokers  |
| Lower respiratory infections | Bermúdez 2021  | N/A                          | Prospective cohort | Spain          | Both | 0         | 0       | Self-report         | Self-report; Administrative medical records or disease registries | Incidence | 231         | 76      | 89     | 2                 | N/A          | N/A   | N/A      | N/A          | Home              | Parental                            | Never smokers  |
| Lower respiratory infections | Broor 2001     | N/A                          | Case-control       | India          | Both | 0         | 4       | Self-report         | Administrative medical records or disease registries              | Morbidity | N/A         | N/A     | N/A    | N/A               | N/A          | 386   | 311      | Hospital     | Home              | Paternal; Other family (not spouse) | Never smokers  |
| Lower respiratory infections | Broughton 2005 | N/A                          | Prospective cohort | United Kingdom | Both | 0         | 0       | Self-report         | Self-report; Biomarker                                            | Incidence | 126         | N/A     | N/A    | 1                 | N/A          | 94    | 32       | Hospital     | Home              | Parental                            | Never smokers  |
| Lower respiratory infections | Charoenca 2013 | N/A                          | Case-control       | Thailand       | Both | 0.08      | 4       | Self-report         | Physician diagnosis                                               | Morbidity | N/A         | N/A     | N/A    | N/A               | N/A          | 462   | 462      | Hospital     | Home              | Parental                            | Never smokers  |
| Lower respiratory infections | Colley 1974    | N/A                          | Prospective cohort | Greater London | Both | 0         | 0       | Self-report         | Self-report; Administrative medical records or disease registries | Incidence | 1,774       | 1,030   | 205    | 1                 | N/A          | N/A   | N/A      | N/A          | Home              | Parental                            | Never smokers  |

**Table S3. Summary of study characteristics**

| Health outcome               | Author-Year     | Study name                           | Study design       | Location      | Sex  | Age start | Age end | Exposure assessment | Outcome assessment                                                                   | Endpoint  | Sample size | Exposed | Events | Follow-up (years) | Person-years | Cases | Controls | Control pool | Exposure location | Exposure source                             | Smoking status                 |
|------------------------------|-----------------|--------------------------------------|--------------------|---------------|------|-----------|---------|---------------------|--------------------------------------------------------------------------------------|-----------|-------------|---------|--------|-------------------|--------------|-------|----------|--------------|-------------------|---------------------------------------------|--------------------------------|
| Lower respiratory infections | Dina 2021       | N/A                                  | Case-control       | West Java     | Both | 1         | 5       | Self-report         | Physician diagnosis                                                                  | Morbidity | N/A         | N/A     | N/A    | N/A               | N/A          | 107   | 107      | Hospital     | Home              | Family (anyone in household)                | Never smokers                  |
| Lower respiratory infections | Duijts 2008     | Generation R Study                   | Prospective cohort | Netherlands   | Both | 0         | 0       | Self-report         | Self-report                                                                          | Incidence | 3,264       | 534     | N/A    | 0.5               | N/A          | N/A   | N/A      | N/A          | Home              | Maternal                                    | Never smokers                  |
| Lower respiratory infections | Dwedat 2018     | N/A                                  | Case-control       | Egypt         | Both | 18        | 99      | Self-report         | Administrative medical records or disease registries                                 | Morbidity | N/A         | N/A     | N/A    | N/A               | N/A          | 20    | 20       | Hospital     | Home              | Family (anyone in household)                | Non-smokers (former and never) |
| Lower respiratory infections | Farr 2000       | N/A                                  | Case-control       | England       | Both | 18        | 75      | Self-report         | Administrative medical records or disease registries                                 | Morbidity | N/A         | N/A     | N/A    | N/A               | N/A          | 178   | 769      | Community    | Home              | Spouse; Other family (not spouse)           | Non-smokers (former and never) |
| Lower respiratory infections | Farr 2000       | N/A                                  | Case-control       | East Midlands | Both | 15        | 79      | Self-report         | Administrative medical records or disease registries                                 | Morbidity | N/A         | N/A     | N/A    | N/A               | N/A          | 65    | 421      | Community    | Home              | Family (anyone in household)                | Any smoking status             |
| Lower respiratory infections | Farzana 2017    | N/A                                  | Case-control       | Bangladesh    | Both | 0.164     | 1       | Self-report         | Physician diagnosis; Administrative medical records or disease registries; Biomarker | Morbidity | N/A         | N/A     | N/A    | N/A               | N/A          | 64    | 64       | Hospital     | Home              | Parental                                    | Never smokers                  |
| Lower respiratory infections | Fergusson 1985  | Christchurch Child Development Study | Prospective cohort | New Zealand   | Both | 0         | 0       | Proxy respondent    | Physician diagnosis; Self-report                                                     | Incidence | 2,294       | 569     | 242    | 2                 | N/A          | N/A   | N/A      | N/A          | Home              | Maternal only; Paternal only; Parental-both | Never smokers                  |
| Lower respiratory infections | Frassanito 2022 | N/A                                  | Case-control       | Lazio         | Both | 0         | 0.999   | Self-report         | Administrative medical records or disease registries                                 | Morbidity | N/A         | N/A     | N/A    | N/A               | N/A          | 645   | 183      | Community    | Home              | Family (anyone in household)                | Never smokers                  |

**Table S3. Summary of study characteristics**

| Health outcome               | Author-Year           | Study name                                     | Study design       | Location    | Sex  | Age start | Age end | Exposure assessment | Outcome assessment                                                        | Endpoint              | Sample size | Exposed | Events | Follow-up (years) | Person-years | Cases | Controls | Control pool | Exposure location | Exposure source              | Smoking status |
|------------------------------|-----------------------|------------------------------------------------|--------------------|-------------|------|-----------|---------|---------------------|---------------------------------------------------------------------------|-----------------------|-------------|---------|--------|-------------------|--------------|-------|----------|--------------|-------------------|------------------------------|----------------|
| Lower respiratory infections | Fuentes-Leonarte 2015 | N/A                                            | Prospective cohort | Spain       | Both | 0         | 0       | Self-report         | Self-report                                                               | Incidence             | 1,309       | N/A     | 749    | 2.5               | N/A          | N/A   | N/A      | N/A          | Home              | Maternal; Paternal           | Never smokers  |
| Lower respiratory infections | Goetghebuer 2004      | N/A                                            | Case-control       | England     | Both | 0         | 1       | Self-report         | Physician diagnosis                                                       | Morbidity             | N/A         | N/A     | N/A    | N/A               | N/A          | 140   | 356      | Hospital     | Home              | Parental                     | Never smokers  |
| Lower respiratory infections | Grant 2012            | N/A                                            | Case-control       | New Zealand | Both | 0         | 4       | Self-report         | Administrative medical records or disease registries                      | Morbidity             | N/A         | N/A     | N/A    | N/A               | N/A          | 288   | 351      | Community    | Home              | Family (anyone in household) | Never smokers  |
| Lower respiratory infections | Hassan 2001           | N/A                                            | Case-control       | Iraq        | Both | 0.167     | 5       | Self-report         | Physician diagnosis                                                       | Morbidity             | N/A         | N/A     | N/A    | N/A               | N/A          | 148   | 250      | Hospital     | Home              | Family (anyone in household) | Never smokers  |
| Lower respiratory infections | Håberg 2007           | Norwegian Mother and Child Cohort (MoBa) study | Prospective cohort | Norway      | Both | 0         | 0       | Self-report         | Self-report                                                               | Incidence             | 17,945      | 3,488   | 2,978  | 1.5               | N/A          | N/A   | N/A      | N/A          | Home              | Parental                     | Never smokers  |
| Lower respiratory infections | Islam 2021            | N/A                                            | Case-control       | Bangladesh  | Both | 0.5       | 5       | Self-report         | Physician diagnosis                                                       | Morbidity             | N/A         | N/A     | N/A    | N/A               | N/A          | 174   | 174      | Hospital     | Home              | Family (anyone in household) | Never smokers  |
| Lower respiratory infections | Johnson 1992          | N/A                                            | Case-control       | Oyo         | Both | 0.04      | 4       | Self-report         | Physician diagnosis; Administrative medical records or disease registries | Morbidity             | N/A         | N/A     | N/A    | N/A               | N/A          | 100   | 100      | Hospital     | Home              | Family (anyone in household) | Never smokers  |
| Lower respiratory infections | Keskinoglu 2007       | N/A                                            | Case-control       | Türkiye     | Both | 2         | 12      | Self-report         | Administrative medical records or disease registries                      | Morbidity             | N/A         | N/A     | N/A    | N/A               | N/A          | 150   | 150      | Community    | Home              | Family (anyone in household) | Never smokers  |
| Lower respiratory infections | Koch 2003             | N/A                                            | Prospective cohort | Greenland   | Both | 0.115     | 2       | Self-report         | Self-report; Physician diagnosis                                          | Incidence             | 287         | 233     | N/A    | 2                 | N/A          | N/A   | N/A      | N/A          | Home              | Family (anyone in household) | Never smokers  |
| Lower respiratory infections | Lanari 2015           | N/A                                            | Prospective cohort | Italy       | Both | 0         | 0       | Self-report         | Self-report; Administrative medical records or                            | Incidence & Mortality | 3,518       | 902     | 185    | 1                 | N/A          | N/A   | N/A      | N/A          | Other; Home       | Family (anyone in household) | Never smokers  |

**Table S3. Summary of study characteristics**

| Health outcome               | Author-Year      | Study name                   | Study design         | Location  | Sex  | Age start | Age end | Exposure assessment | Outcome assessment                                                                         | Endpoint  | Sample size | Exposed | Events | Follow-up (years) | Person-years | Cases | Controls | Control pool | Exposure location | Exposure source              | Smoking status     |
|------------------------------|------------------|------------------------------|----------------------|-----------|------|-----------|---------|---------------------|--------------------------------------------------------------------------------------------|-----------|-------------|---------|--------|-------------------|--------------|-------|----------|--------------|-------------------|------------------------------|--------------------|
| Lower respiratory infections | Liu 2022         | N/A                          | Retrospective cohort | Guangdong | Both | 3         | 6       | Self-report         | disease registries<br>Physician diagnosis                                                  | Incidence | 3,226       | 1,862   | 733    | 1                 | N/A          | N/A   | N/A      | N/A          | Home              | Family (anyone in household) | Never smokers      |
| Lower respiratory infections | Liyanage 2021    | N/A                          | Case-control         | Sri Lanka | Both | 0.167     | 5.083   | Self-report         | Physician diagnosis                                                                        | Morbidity | N/A         | N/A     | N/A    | N/A               | N/A          | 37    | 37       | Hospital     | Home              | Family (anyone in household) | Never smokers      |
| Lower respiratory infections | Loeb 2009        | N/A                          | Case-control         | Canada    | Both | 65        | 99      | Self-report         | Physician diagnosis;<br>Biomarker                                                          | Morbidity | N/A         | N/A     | N/A    | N/A               | N/A          | 693   | 867      | Community    | Home              | Family (anyone in household) | Any smoking status |
| Lower respiratory infections | Marbury 1996     | N/A                          | Prospective cohort   | Minnesota | Both | 0         | 0       | Self-report         | Administrative medical records or disease registries                                       | Incidence | 1,424       | 107     | 30     | 2                 | N/A          | N/A   | N/A      | N/A          | Home              | Maternal                     | Never smokers      |
| Lower respiratory infections | McConnochie 1986 | N/A                          | Case-control         | New York  | Both | 0         | 1       | Self-report         | Physician diagnosis;<br>Administrative medical records or disease registries               | Morbidity | N/A         | N/A     | N/A    | N/A               | N/A          | 53    | 106      | Hospital     | Home              | Family (anyone in household) | Never smokers      |
| Lower respiratory infections | Miyahara 2017    | Nha Trang Birth Cohort study | Prospective cohort   | Viet Nam  | Both | 0         | 0       | Self-report         | Physician diagnosis;<br>Administrative medical records or disease registries;<br>Biomarker | Incidence | 1,624       | 930     | 180    | 2                 | N/A          | N/A   | N/A      | N/A          | Home              | Paternal                     | Never smokers      |
| Lower respiratory infections | Nenna 2017       | N/A                          | Case-control         | Lazio     | Both | 0.5       | 2       | Self-report         | Administrative medical records or disease registries                                       | Morbidity | N/A         | N/A     | N/A    | N/A               | N/A          | 213   | 213      | Hospital     | Home              | Family (anyone in household) | Never smokers      |
| Lower respiratory infections | Nuesslein 1999   | N/A                          | Prospective cohort   | Germany   | Both | 0         | 0       | Self-report         | Self-report                                                                                | Incidence | 91          | 47      | N/A    | 1                 | N/A          | N/A   | N/A      | N/A          | Home              | Family (anyone in household) | Never smokers      |

**Table S3. Summary of study characteristics**

| Health outcome               | Author-Year         | Study name                              | Study design       | Location                | Sex  | Age start | Age end | Exposure assessment    | Outcome assessment                                                                   | Endpoint  | Sample size | Exposed | Events | Follow-up (years) | Person-years | Cases | Controls | Control pool | Exposure location | Exposure source                           | Smoking status |
|------------------------------|---------------------|-----------------------------------------|--------------------|-------------------------|------|-----------|---------|------------------------|--------------------------------------------------------------------------------------|-----------|-------------|---------|--------|-------------------|--------------|-------|----------|--------------|-------------------|-------------------------------------------|----------------|
| Lower respiratory infections | Pullan 1982         | N/A                                     | Case-control       | North East England      | Both | 0         | 0.999   | Self-report            | Administrative medical records or disease registries                                 | Morbidity | N/A         | N/A     | N/A    | N/A               | N/A          | 130   | 111      | Community    | Home              | Maternal; Paternal                        | Never smokers  |
| Lower respiratory infections | Ramesh 2012         | N/A                                     | Case-control       | Karnataka               | Both | 0.08      | 4       | Self-report            | Physician diagnosis                                                                  | Morbidity | N/A         | N/A     | N/A    | N/A               | N/A          | 101   | 101      | Hospital     | Other             | Any                                       | Never smokers  |
| Lower respiratory infections | Robledo-Aceves 2018 | N/A                                     | Case-control       | Jalisco                 | Both | 0.082     | 1       | Self-report            | Physician diagnosis; Administrative medical records or disease registries; Biomarker | Morbidity | N/A         | N/A     | N/A    | N/A               | N/A          | 134   | 134      | Hospital     | Home              | Family (anyone in household)              | Never smokers  |
| Lower respiratory infections | Roda 2011           | PARIS cohort study                      | Prospective cohort | France                  | Both | 0         | 1       | Self-report            | Self-report                                                                          | Incidence | 2,940       | 592     | N/A    | 1                 | N/A          | N/A   | N/A      | N/A          | Home              | Family (anyone in household)              | Never smokers  |
| Lower respiratory infections | Roux 2015           | N/A                                     | Prospective cohort | Western Cape            | Both | 0         | 0       | Self-report            | Physician diagnosis; Biomarker                                                       | Incidence | N/A         | N/A     | 141    | 0.7               | 511          | N/A   | N/A      | N/A          | Home              | Maternal                                  | Never smokers  |
| Lower respiratory infections | Rylander 1995       | N/A                                     | Case-control       | Sweden                  | Both | 0.329     | 4       | Self-report            | Physician diagnosis                                                                  | Morbidity | N/A         | N/A     | N/A    | N/A               | N/A          | 347   | 719      | Community    | Home              | Paternal; Maternal; Maternal and paternal | Never smokers  |
| Lower respiratory infections | Schulte-Hobein 1992 | N/A                                     | Prospective cohort | Germany                 | Both | 0         | 0       | Self-report; Biomarker | Self-report                                                                          | Incidence | 138         | 69      | 50     | 1                 | N/A          | N/A   | N/A      | N/A          | Home              | Maternal                                  | Never smokers  |
| Lower respiratory infections | Taylor 1987         | Child Health and Education Study (CHES) | Prospective cohort | United Kingdom          | Both | 0         | 0       | Self-report            | Self-report                                                                          | Incidence | 5,982       | 353     | 889    | 5                 | N/A          | N/A   | N/A      | N/A          | Home              | Maternal                                  | Never smokers  |
| Lower respiratory infections | Tupasi 1990         | N/A                                     | Prospective cohort | National Capital Region | Both | 0         | 4       | Self-report            | Physician diagnosis                                                                  | Incidence | N/A         | N/A     | 6,542  | 2                 | 1,080        | N/A   | N/A      | N/A          | Home              | Maternal and paternal                     | Never smokers  |
| Lower respiratory infections | Törmänen 2018       | N/A                                     | Case-control       | Finland                 | Both | 0         | 0.5     | Self-report            | Physician diagnosis; Administrative medical records or                               | Morbidity | N/A         | N/A     | N/A    | N/A               | N/A          | 138   | 112      | Community    | Home              | Maternal; Paternal                        | Never smokers  |



**Table S3. Summary of study characteristics**

| Health outcome               | Author-Year         | Study name                                                   | Study design       | Location           | Sex  | Age start | Age end | Exposure assessment    | Outcome assessment                                                        | Endpoint  | Sample size | Exposed | Events | Follow-up (years) | Person-years | Cases | Controls | Control pool | Exposure location | Exposure source                           | Smoking status |
|------------------------------|---------------------|--------------------------------------------------------------|--------------------|--------------------|------|-----------|---------|------------------------|---------------------------------------------------------------------------|-----------|-------------|---------|--------|-------------------|--------------|-------|----------|--------------|-------------------|-------------------------------------------|----------------|
| Lower respiratory infections | Verani 2016         | N/A                                                          | Case-control       | Gauteng            | Both | 0.153     | 4       | Self-report            | disease registries; Biomarker<br>Physician diagnosis; Biomarker           | Morbidity | N/A         | N/A     | N/A    | N/A               | N/A          | 889   | 2,628    | Community    | Home              | Parental                                  | Never smokers  |
| Lower respiratory infections | Victora 1994        | N/A                                                          | Case-control       | Rio Grande do Sul  | Both | 0         | 1       | Self-report            | Biomarker; Physician diagnosis                                            | Morbidity | N/A         | N/A     | N/A    | N/A               | N/A          | 864   | 850      | Community    | Home              | Paternal; Maternal; Maternal and paternal | Never smokers  |
| Lower respiratory infections | Wenten 2005         | Air pollution and absence study (APAS)                       | Prospective cohort | California         | Both | 9         | 11      | Self-report            | Self-report                                                               | Incidence | 1,313       | 223     | N/A    | 0.5               | N/A          | 223   | 1,090    | Community    | Home              | Family (anyone in household)              | Never smokers  |
| Lower respiratory infections | Wright 1991         | N/A                                                          | Prospective cohort | Arizona            | Both | 0         | 0       | Self-report            | Physician diagnosis; Administrative medical records or disease registries | Incidence | 797         | 207     | N/A    | 1.7               | N/A          | N/A   | N/A      | N/A          | Home              | Maternal                                  | Never smokers  |
| Otitis media                 | Adair-Bischoff 1998 | N/A                                                          | Case-control       | Canada             | Both | 0         | 3.083   | Self-report; Biomarker | Self-report; Administrative medical records or disease registries         | Morbidity | N/A         | N/A     | N/A    | N/A               | N/A          | N/A   | N/A      | Community    | Home              | Family (anyone in household)              | Never smokers  |
| Otitis media                 | Alho 1993           | N/A                                                          | Prospective cohort | Finland            | Both | 0.08      | 0.08    | Self-report            | Administrative medical records or disease registries; Physician diagnosis | Incidence | 2,512       | 316     | 1,956  | 1.8               | N/A          | N/A   | N/A      | N/A          | Home              | Parental                                  | Never smokers  |
| Otitis media                 | Bentdal 2007        | Oslo Birth Cohort                                            | Prospective cohort | Oslo               | Both | 0         | 0       | Self-report            | Self-report                                                               | Incidence | 2,522       | 1,015   | 336    | 10                | N/A          | N/A   | N/A      | N/A          | Home              | Parental                                  | Never smokers  |
| Otitis media                 | Clamp 2020          | Avon Longitudinal Study of Parents and Children (Children of | Prospective cohort | South West England | Both | 1         | 1       | Self-report            | Biomarker; Self-report                                                    | Incidence | 6,560       | 2,920   | 746    | 8                 | N/A          | N/A   | N/A      | N/A          | Home              | Family (anyone in household)              | Never smokers  |

**Table S3. Summary of study characteristics**

| Health outcome | Author-Year           | Study name                                     | Study design       | Location   | Sex  | Age start | Age end | Exposure assessment | Outcome assessment                                                                   | Endpoint  | Sample size | Exposed | Events | Follow-up (years) | Person-years | Cases | Controls | Control pool | Exposure location | Exposure source              | Smoking status |
|----------------|-----------------------|------------------------------------------------|--------------------|------------|------|-----------|---------|---------------------|--------------------------------------------------------------------------------------|-----------|-------------|---------|--------|-------------------|--------------|-------|----------|--------------|-------------------|------------------------------|----------------|
|                |                       | the 90s study)                                 |                    |            |      |           |         |                     |                                                                                      |           |             |         |        |                   |              |       |          |              |                   |                              |                |
| Otitis media   | Collet 1995           | N/A                                            | Prospective cohort | Canada     | Both | 0         | 0       | Self-report         | Self-report                                                                          | Incidence | 918         | 325     | 601    | 4                 | N/A          | N/A   | N/A      | N/A          | Home              | Maternal                     | Never smokers  |
| Otitis media   | Costa 2004            | N/A                                            | Case-control       | Mozambique | Both | 0.5       | 5       | Self-report         | Physician diagnosis; Administrative medical records or disease registries; Biomarker | Morbidity | N/A         | N/A     | N/A    | N/A               | N/A          | 187   | 118      | Community    | Home              | Family (anyone in household) | Never smokers  |
| Otitis media   | Daigler 1991          | N/A                                            | Case-control       | New York   | Both | 0         | 21      | Self-report         | Physician diagnosis                                                                  | Morbidity | N/A         | N/A     | N/A    | N/A               | N/A          | 125   | 246      | Community    | Home              | Maternal; Paternal           | Never smokers  |
| Otitis media   | Daly 1999             | Early Otitis Media Study                       | Prospective cohort | Minnesota  | Both | 0         | 0       | Self-report         | Administrative medical records or disease registries                                 | Incidence | 511         | 22      | 204    | 0.5               | N/A          | N/A   | N/A      | N/A          | Home              | Parental                     | Never smokers  |
| Otitis media   | Daly 2007             | Little Ears Study                              | Prospective cohort | Minnesota  | Both | 0         | 0       | Self-report         | Physician diagnosis                                                                  | Incidence | 200         | 160     | 125    | 0.5               | N/A          | N/A   | N/A      | N/A          | Home              | Family (anyone in household) | Never smokers  |
| Otitis media   | Ey 1995               | Tucson Children's Respiratory Study (CRS)      | Prospective cohort | Arizona    | Both | 0         | 0       | Self-report         | Administrative medical records or disease registries; Physician diagnosis            | Incidence | 949         | 232     | 609    | 3                 | N/A          | N/A   | N/A      | N/A          | Home              | Maternal                     | Never smokers  |
| Otitis media   | Fuentes-Leonarte 2015 | INMA (Childhood and the environment)           | Prospective cohort | Spain      | Both | 0         | 0       | Self-report         | Self-report; Physician diagnosis                                                     | Incidence | 4,274       | 1,308   | 646    | 3                 | N/A          | N/A   | N/A      | N/A          | Home              | Maternal; Paternal           | Never smokers  |
| Otitis media   | Håberg 2010           | Norwegian Mother and Child Cohort Study (MoBa) | Prospective cohort | Norway     | Both | 0         | 1.5     | Self-report         | Self-report                                                                          | Incidence | 49,704      | 7,470   | 22,671 | 1.5               | N/A          | N/A   | N/A      | N/A          | Home              | Parental                     | Never smokers  |

**Table S3. Summary of study characteristics**

| Health outcome | Author-Year    | Study name                                                         | Study design       | Location          | Sex  | Age start | Age end | Exposure assessment | Outcome assessment                                                                     | Endpoint  | Sample size | Exposed | Events | Follow-up (years) | Person-years | Cases | Controls | Control pool | Exposure location | Exposure source              | Smoking status |
|----------------|----------------|--------------------------------------------------------------------|--------------------|-------------------|------|-----------|---------|---------------------|----------------------------------------------------------------------------------------|-----------|-------------|---------|--------|-------------------|--------------|-------|----------|--------------|-------------------|------------------------------|----------------|
| Otitis media   | Jensen 2013    | N/A                                                                | Prospective cohort | Greenland         | Both | 0         | 0       | Self-report         | Administrative medical records or disease registries                                   | Incidence | 133         | 91      | 234    | 11                | N/A          | N/A   | N/A      | N/A          | Home              | Maternal                     | Never smokers  |
| Otitis media   | Koch 2011      | N/A                                                                | Prospective cohort | Greenland         | Both | 0         | 4       | Self-report         | Self-report; Physician diagnosis                                                       | Incidence | 465         | 372     | 55     | 2.6               | N/A          | N/A   | N/A      | N/A          | Home              | Family (anyone in household) | Never smokers  |
| Otitis media   | Niclasen 2016  | Aarhus Birth Cohort (ABC)                                          | Prospective cohort | Denmark           | Both | 0         | 0       | Self-report         | Self-report                                                                            | Incidence | 7,578       | 3,993   | 3,159  | 12                | N/A          | N/A   | N/A      | N/A          | Home              | Maternal                     | Never smokers  |
| Otitis media   | Prins-van 2017 | Wheezing and Illnesses Study Leidsche Rijn (WHISTLER) cohort study | Prospective cohort | Netherlands       | Both | 0.115     | 0.115   | Self-report         | Self-report                                                                            | Incidence | 1,012       | 26      | 338    | 0.9               | N/A          | N/A   | N/A      | N/A          | Other             | Any                          | Never smokers  |
| Otitis media   | Pukander 1985  | N/A                                                                | Case-control       | Finland           | Both | 2         | 3       | Self-report         | Physician diagnosis                                                                    | Morbidity | N/A         | N/A     | N/A    | N/A               | N/A          | 264   | 207      | Community    | Home              | Parental                     | Never smokers  |
| Otitis media   | Samson 2020    | N/A                                                                | Prospective cohort | Tamil Nadu, Rural | Both | 0         | 0       | Self-report         | Physician diagnosis                                                                    | Incidence | 107         | 18      | 15     | 8                 | N/A          | N/A   | N/A      | N/A          | Home              | Parental                     | Never smokers  |
| Otitis media   | Stenstrom 1993 | N/A                                                                | Case-control       | Canada            | Both | 0         | 4       | Self-report         | Self-report; Administrative medical records or disease registries; Physician diagnosis | Morbidity | N/A         | N/A     | N/A    | N/A               | N/A          | 45    | 26       | Hospital     | Home              | Family (anyone in household) | Never smokers  |
| Otitis media   | Ståhlberg 1986 | N/A                                                                | Case-control       | Finland           | Both | 0.833     | 3.75    | Self-report         | Physician diagnosis                                                                    | Morbidity | N/A         | N/A     | N/A    | N/A               | N/A          | 159   | 210      | Community    | Home              | Parental-one; Parental-both  | Never smokers  |
| Otitis media   | Tainio 1988    | N/A                                                                | Prospective cohort | Finland           | Both | 0         | 0       | Self-report         | Physician diagnosis                                                                    | Incidence | 183         | 66      | N/A    | 2                 | N/A          | N/A   | N/A      | N/A          | Home              | Parental                     | Never smokers  |
| Otitis media   | Teele 1989     | N/A                                                                | Prospective cohort | Massachusetts     | Both | 0         | 0.25    | Self-report         | Physician diagnosis; Administrative medical records or                                 | Incidence | 498         | 298     | 465    | 7                 | N/A          | N/A   | N/A      | N/A          | Home              | Parental                     | Never smokers  |

**Table S3. Summary of study characteristics**

| Health outcome | Author-Year    | Study name                                                                                   | Study design       | Location                                                     | Sex  | Age start | Age end | Exposure assessment | Outcome assessment                                            | Endpoint              | Sample size | Exposed | Events | Follow-up (years) | Person-years | Cases | Controls | Control pool | Exposure location | Exposure source                   | Smoking status                 |
|----------------|----------------|----------------------------------------------------------------------------------------------|--------------------|--------------------------------------------------------------|------|-----------|---------|---------------------|---------------------------------------------------------------|-----------------------|-------------|---------|--------|-------------------|--------------|-------|----------|--------------|-------------------|-----------------------------------|--------------------------------|
|                |                |                                                                                              |                    |                                                              |      |           |         |                     | disease registries                                            |                       |             |         |        |                   |              |       |          |              |                   |                                   |                                |
| Otitis media   | Wijayanti 2021 | N/A                                                                                          | Case-control       | Central Java                                                 | Both | 6         | 12      | Self-report         | Physician diagnosis                                           | Morbidity             | N/A         | N/A     | N/A    | N/A               | N/A          | 125   | 125      | Community    | Home              | Family (anyone in household)      | Never smokers                  |
| Otitis media   | Yang 1999      | N/A                                                                                          | Case-control       | Taiwan (Province of China)                                   | Both | 6         | 12      | Self-report         | Self-report                                                   | Morbidity             | N/A         | N/A     | N/A    | N/A               | N/A          | 219   | 219      | Community    | Home              | Family (anyone in household)      | Never smokers                  |
| Stroke         | Bonita 1999    | N/A                                                                                          | Case-control       | New Zealand                                                  | Both | 35        | 74      | Self-report         | Administrative medical records or disease registries          | Morbidity & Mortality | N/A         | N/A     | N/A    | N/A               | N/A          | 155   | 676      | Community    | Home or work      | Any                               | Non-smokers (former and never) |
| Stroke         | Diver 2018     | The American Cancer Society's Cancer Prevention Study-II Nutrition Cohort (CPS-II Nutrition) | Prospective cohort | United States of America                                     | Both | 50        | 74      | Self-report         | Administrative medical records or disease registries          | Mortality             | N/A         | N/A     | 1,336  | 18.8              | 888,879      | N/A   | N/A      | N/A          | Home              | Family (anyone in household)      | Never smokers                  |
| Stroke         | Gallo 2010     | European Prospective Investigation into Cancer and Nutrition (EPIC)                          | Prospective cohort | France; Italy; Netherlands; Germany; Sweden; Denmark; Norway | Both | 18        | 99      | Self-report         | Administrative medical records or disease registries          | Mortality             | 127,404     | 71,837  | 203    | 9.9               | N/A          | N/A   | N/A      | N/A          | Home; Work        | Family (anyone in household); Any | Never smokers                  |
| Stroke         | Glymour 2008   | Health and Retirement Study (HRS)                                                            | Prospective cohort | United States of America                                     | Both | 50        | 99      | Self-report         | Self-report                                                   | Incidence & Mortality | 16,225      | N/A     | 688    | 9.1               | 85,551       | N/A   | N/A      | N/A          | Home              | Spouse                            | Never smokers; Former smokers  |
| Stroke         | He 2012        | N/A                                                                                          | Prospective cohort | Shaanxi                                                      | Both | 51.5      | 87.8    | Self-report         | Death certificates; Administrative medical records or disease | Mortality             | 910         | 611     | 60     | 15.4              | N/A          | N/A   | N/A      | N/A          | Home or work      | Any                               | Never smokers                  |

**Table S3. Summary of study characteristics**

| Health outcome | Author-Year    | Study name                                                              | Study design       | Location                                         | Sex    | Age start | Age end | Exposure assessment | Outcome assessment                                                        | Endpoint              | Sample size | Exposed | Events | Follow-up (years) | Person-years | Cases | Controls | Control pool | Exposure location | Exposure source              | Smoking status                 |
|----------------|----------------|-------------------------------------------------------------------------|--------------------|--------------------------------------------------|--------|-----------|---------|---------------------|---------------------------------------------------------------------------|-----------------------|-------------|---------|--------|-------------------|--------------|-------|----------|--------------|-------------------|------------------------------|--------------------------------|
| Stroke         | Hill 2007      | New Zealand Census Mortality Study                                      | Prospective cohort | New Zealand                                      | Both   | 45        | 74      | Self-report         | registries; Death certificates                                            | Mortality             | 668,259     | 121,812 | 1,152  | 3                 | 1,983,184    | N/A   | N/A      | N/A          | Home              | Family (anyone in household) | Never smokers                  |
| Stroke         | Hou 2017       | China Nationwide Retrospective Mortality Survey                         | Case-control       | China                                            | Both   | 30        | 98      | Self-report         | Administrative medical records or disease registries                      | Mortality             | N/A         | N/A     | N/A    | N/A               | N/A          | N/A   | N/A      | Community    | Home              | Spouse                       | Never smokers                  |
| Stroke         | Kobayashi 2022 | Japan Public Health Center-based prospective study                      | Prospective cohort | Japan                                            | Female | 40        | 69      | Self-report         | Administrative medical records or disease registries                      | Incidence             | 22,445      | 11,239  | N/A    | 18.9              | 431,721      | N/A   | N/A      | N/A          | Home              | Spouse                       | Never smokers                  |
| Stroke         | Lee 1986       | N/A                                                                     | Case-control       | England                                          | Both   | 35        | 74      | Self-report         | Physician diagnosis; Administrative medical records or disease registries | Morbidity             | N/A         | N/A     | N/A    | N/A               | N/A          | 55    | 269      | Hospital     | Home              | Spouse                       | Never smokers                  |
| Stroke         | Malek 2015     | Reasons for Geographic and Racial Differences in Stroke (REGARDS) Study | Prospective cohort | United States of America                         | Both   | 45        | 99      | Self-report         | Administrative medical records or disease registries; Self-report         | Incidence & Mortality | 21,743      | 5,081   | 428    | 5.6               | 121,231      | N/A   | N/A      | N/A          | Other             | Any                          | Non-smokers (former and never) |
| Stroke         | McGhee 2005    | N/A                                                                     | Case-control       | Hong Kong Special Administrative Region of China | Both   | 60        | 99      | Self-report         | Death certificates                                                        | Mortality             | N/A         | N/A     | N/A    | N/A               | N/A          | 223   | 221      | Community    | Home              | Family (anyone in household) | Never smokers                  |
| Stroke         | Nishino 2014   | Three-Prefecture Cohort Study                                           | Prospective cohort | Aichi; Miyagi; Ōsaka                             | Female | 40        | 99      | Self-report         | Administrative medical records or disease registries;                     | Mortality             | 36,021      | 22,187  | 906    | 12.2              | 437,715      | N/A   | N/A      | N/A          | Home              | Family (anyone in household) | Never smokers                  |

**Table S3. Summary of study characteristics**

| Health outcome          | Author-Year       | Study name                                                                                   | Study design       | Location                 | Sex    | Age start | Age end | Exposure assessment | Outcome assessment                                                       | Endpoint              | Sample size | Exposed | Events | Follow-up (years) | Person-years | Cases | Controls | Control pool | Exposure location | Exposure source                   | Smoking status |
|-------------------------|-------------------|----------------------------------------------------------------------------------------------|--------------------|--------------------------|--------|-----------|---------|---------------------|--------------------------------------------------------------------------|-----------------------|-------------|---------|--------|-------------------|--------------|-------|----------|--------------|-------------------|-----------------------------------|----------------|
| Stroke                  | Poulsen 2021      | Danish Diet Cancer and Health (DCH) cohort                                                   | Case-cohort        | Denmark                  | Both   | 50        | 64      | Self-report         | Administrative medical records or disease registries                     | Incidence & Mortality | 1,734       | N/A     | 534    | 13.5              | N/A          | N/A   | N/A      | N/A          | Home or work      | Any                               | Never smokers  |
| Stroke                  | Qureshi 2005      | First National Health and Nutrition Examination Survey Epidemiologic Follow-Up Study (NHEFS) | Prospective cohort | United States of America | Female | 25        | 74      | Self-report         | Administrative medical records or disease registries; Self-report        | Incidence & Mortality | 3,032       | 1,823   | 109    | 8.5               | N/A          | N/A   | N/A      | N/A          | Home              | Spouse                            | Never smokers  |
| Stroke                  | Sandler 1989      | N/A                                                                                          | Prospective cohort | Maryland                 | Both   | 25        | 99      | Self-report         | Death certificates                                                       | Mortality             | N/A         | N/A     | 655    | 10                | 189,597      | N/A   | N/A      | N/A          | Home              | Family (anyone in household)      | Never smokers  |
| Stroke                  | Wen 2006          | Shanghai Women's health study                                                                | Prospective cohort | Shanghai                 | Female | 40        | 70      | Self-report         | Administrative medical records or disease registries; Death certificates | Mortality             | 65,180      | 39,795  | 157    | 5.7               | N/A          | N/A   | N/A      | N/A          | Home              | Spouse                            | Never smokers  |
| Subarachnoid hemorrhage | Anderson 2004     | Australasian Cooperative Research on Subarachnoid Hemorrhage Study (ACROSS)                  | Case-control       | Australia; New Zealand   | Both   | 15        | 99      | Self-report         | Administrative medical records or disease registries                     | Morbidity & Mortality | N/A         | N/A     | N/A    | N/A               | N/A          | 8     | 18       | Community    | Home              | Family (anyone in household)      | Never smokers  |
| Subarachnoid hemorrhage | Yamada 2003       | Japan Collaborative Cohort Study (JACC)                                                      | Prospective cohort | Japan                    | Both   | 40        | 79      | Self-report         | Death certificates                                                       | Mortality             | N/A         | N/A     | 72     | 9.9               | 386,840      | N/A   | N/A      | N/A          | Other             | Any                               | Unspecified    |
| Tracheal, bronchus,     | Abdel-Rahman 2020 | Prostate, Lung, Colorectal,                                                                  | Prospective cohort | United States of America | Both   | 55        | 74      | Self-report         | Administrative medical records or                                        | Incidence             | 146,981     | 50,061  | N/A    | 8                 | N/A          | N/A   | N/A      | N/A          | Work; Home        | Any; Family (anyone in household) | Never smokers  |

**Table S3. Summary of study characteristics**

| Health outcome                      | Author-Year      | Study name             | Study design | Location                                                                              | Sex    | Age start | Age end | Exposure assessment           | Outcome assessment                                                                   | Endpoint              | Sample size | Exposed | Events | Follow-up (years) | Person-years | Cases | Controls | Control pool | Exposure location | Exposure source                   | Smoking status                 |
|-------------------------------------|------------------|------------------------|--------------|---------------------------------------------------------------------------------------|--------|-----------|---------|-------------------------------|--------------------------------------------------------------------------------------|-----------------------|-------------|---------|--------|-------------------|--------------|-------|----------|--------------|-------------------|-----------------------------------|--------------------------------|
| and lung cancer                     |                  | and Ovary (PLCO) trial |              |                                                                                       |        |           |         |                               | disease registries                                                                   |                       |             |         |        |                   |              |       |          |              |                   |                                   |                                |
| Tracheal, bronchus, and lung cancer | Al-Zoughool 2013 | N/A                    | Case-control | Canada                                                                                | Both   | 35        | 75      | Self-report                   | Administrative medical records or disease registries; Biomarker                      | Morbidity             | N/A         | N/A     | N/A    | N/A               | N/A          | 32    | 410      | Community    | Home              | Family (anyone in household)      | Never smokers                  |
| Tracheal, bronchus, and lung cancer | Asomaning 2008   | N/A                    | Case-control | Massachusetts                                                                         | Both   | 18        | 99      | Self-report                   | Physician diagnosis                                                                  | Morbidity             | N/A         | N/A     | N/A    | N/A               | N/A          | 34    | 128      | Community    | Home; Work        | Family (anyone in household); Any | Never smokers                  |
| Tracheal, bronchus, and lung cancer | Behera 2005      | N/A                    | Case-control | Other Union Territories                                                               | Female | 30        | 80      | Self-report                   | Physician diagnosis; Administrative medical records or disease registries; Biomarker | Morbidity             | N/A         | N/A     | N/A    | N/A               | N/A          | 67    | 46       | Hospital     | Other             | Any                               | Any smoking status             |
| Tracheal, bronchus, and lung cancer | Boffetta 1998    | N/A                    | Case-control | Germany; Sweden; France; Portugal; Spain; South West England; Veneto; Piemonte; Lazio | Both   | 18        | 74      | Self-report                   | Administrative medical records or disease registries                                 | Morbidity             | N/A         | N/A     | N/A    | N/A               | N/A          | 649   | 1,540    | Hospital     | Home and work     | Any                               | Never smokers                  |
| Tracheal, bronchus, and lung cancer | Boffetta 1999    | N/A                    | Case-control | Sweden; France; Germany; Veneto; Lazio; Wielkopolski e; Moscow City; Romania          | Both   | 18        | 99      | Self-report                   | Administrative medical records or disease registries; Biomarker                      | Morbidity             | N/A         | N/A     | N/A    | N/A               | N/A          | 70    | 178      | Hospital     | Home or work      | Any                               | Never smokers                  |
| Tracheal, bronchus,                 | Brownson 1992    | N/A                    | Case-control | Missouri                                                                              | Female | 30        | 84      | Proxy respondent; Self-report | Administrative medical records or disease                                            | Morbidity & Mortality | N/A         | N/A     | N/A    | N/A               | N/A          | 615   | 1,400    | Community    | Home              | Family (anyone in household)      | Non-smokers (former and never) |

**Table S3. Summary of study characteristics**

| Health outcome                      | Author-Year     | Study name                                                     | Study design       | Location                                         | Sex  | Age start | Age end | Exposure assessment | Outcome assessment                                                                    | Endpoint              | Sample size | Exposed | Events | Follow-up (years) | Person-years | Cases | Controls | Control pool | Exposure location | Exposure source                   | Smoking status     |
|-------------------------------------|-----------------|----------------------------------------------------------------|--------------------|--------------------------------------------------|------|-----------|---------|---------------------|---------------------------------------------------------------------------------------|-----------------------|-------------|---------|--------|-------------------|--------------|-------|----------|--------------|-------------------|-----------------------------------|--------------------|
| and lung cancer                     |                 |                                                                |                    |                                                  |      |           |         |                     | registries; Biomarker                                                                 |                       |             |         |        |                   |              |       |          |              |                   |                                   |                    |
| Tracheal, bronchus, and lung cancer | Bräuner 2012    | Diet, Cancer, and Health Study                                 | Prospective cohort | Denmark                                          | Both | 50        | 64      | Self-report         | Administrative medical records or disease registries                                  | Incidence & Mortality | 52,692      | 33,865  | 589    | 9.6               | N/A          | N/A   | N/A      | N/A          | Home or work      | Any                               | Any smoking status |
| Tracheal, bronchus, and lung cancer | Cardenas 1997   | Cancer Prevention Study II (CPS-II)                            | Prospective cohort | United States of America; Puerto Rico            | Both | 30        | 99      | Self-report         | Self-report; Death certificates; Administrative medical records or disease registries | Mortality             | 217,572     | 62,631  | 185    | 7                 | N/A          | N/A   | N/A      | N/A          | Home              | Spouse                            | Never smokers      |
| Tracheal, bronchus, and lung cancer | Cassidy 2006    | The Liverpool Lung Project                                     | Case-control       | North West England                               | Both | 18        | 99      | Self-report         | Administrative medical records or disease registries                                  | Morbidity             | N/A         | N/A     | N/A    | N/A               | N/A          | 779   | 2,224    | Community    | Home; Work        | Family (anyone in household); Any | Any smoking status |
| Tracheal, bronchus, and lung cancer | Chan-Yeung 2003 | N/A                                                            | Case-control       | Hong Kong Special Administrative Region of China | Both | 18        | 99      | Self-report         | Physician diagnosis; Biomarker                                                        | Morbidity             | N/A         | N/A     | N/A    | N/A               | N/A          | 171   | 215      | Hospital     | Home or work      | Any                               | Never smokers      |
| Tracheal, bronchus, and lung cancer | Chen 2008       | N/A                                                            | Case-control       | Taiwan (Province of China)                       | Both | 18        | 99      | Self-report         | Physician diagnosis; Biomarker                                                        | Morbidity             | N/A         | N/A     | N/A    | N/A               | N/A          | 147   | 400      | Hospital     | Home or work      | Any                               | Any smoking status |
| Tracheal, bronchus, and lung cancer | Cheng 2022      | China Kadoorie Biobank                                         | Prospective cohort | China                                            | Both | 30        | 79      | Self-report         | Administrative medical records or disease registries                                  | Mortality             | 243,539     | 177,583 | 695    | 10.2              | N/A          | N/A   | N/A      | N/A          | Home              | Family (anyone in household)      | Never smokers      |
| Tracheal, bronchus, and lung cancer | Consonni 2018   | Environment And Genetics in Lung cancer Etiology (EAGLE) study | Case-control       | Lombardia                                        | Both | 35        | 79      | Self-report         | Administrative medical records or disease registries; Biomarker                       | Morbidity             | N/A         | N/A     | N/A    | N/A               | N/A          | 1,318 | 1,368    | Community    | Home or work      | Any                               | Any smoking status |



**Table S3. Summary of study characteristics**

| Health outcome                      | Author-Year    | Study name                                                                                          | Study design       | Location                                                              | Sex    | Age start | Age end | Exposure assessment           | Outcome assessment                                                                   | Endpoint              | Sample size | Exposed | Events | Follow-up (years) | Person-years | Cases | Controls | Control pool | Exposure location | Exposure source                   | Smoking status |
|-------------------------------------|----------------|-----------------------------------------------------------------------------------------------------|--------------------|-----------------------------------------------------------------------|--------|-----------|---------|-------------------------------|--------------------------------------------------------------------------------------|-----------------------|-------------|---------|--------|-------------------|--------------|-------|----------|--------------|-------------------|-----------------------------------|----------------|
| Tracheal, bronchus, and lung cancer | Dalager 1986   | N/A                                                                                                 | Case-control       | Louisiana; New Jersey; Texas                                          | Both   | 18        | 99      | Self-report                   | Administrative medical records or disease registries                                 | Morbidity             | N/A         | N/A     | N/A    | N/A               | N/A          | 48    | 466      | Hospital     | Home              | Spouse                            | Never smokers  |
| Tracheal, bronchus, and lung cancer | Davis 2018     | N/A                                                                                                 | Case-control       | Czechia; Hungary; Mazowieckie ; Romania; Russian Federation; Slovenia | Female | 20        | 75      | Self-report                   | Administrative medical records or disease registries; Biomarker                      | Morbidity             | N/A         | N/A     | N/A    | N/A               | N/A          | 86    | 181      | Hospital     | Home or work      | Any                               | Never smokers  |
| Tracheal, bronchus, and lung cancer | Du 1995        | N/A                                                                                                 | Case-control       | Guangdong                                                             | Female | 18        | 99      | Self-report                   | Administrative medical records or disease registries                                 | Mortality             | N/A         | N/A     | N/A    | N/A               | N/A          | 75    | 128      | Community    | Home              | Spouse                            | Never smokers  |
| Tracheal, bronchus, and lung cancer | Enstrom 2003   | American Cancer Society Cancer Prevention Study (CPS I); California Cancer Prevention Study (CPS I) | Prospective cohort | California                                                            | Both   | 35        | 84      | Self-report                   | Death certificates; Administrative medical records or disease registries             | Mortality             | 28,079      | 13,222  | 200    | 38                | N/A          | N/A   | N/A      | N/A          | Home              | Spouse                            | Never smokers  |
| Tracheal, bronchus, and lung cancer | Ferreccio 2013 | N/A                                                                                                 | Case-control       | Chile                                                                 | Both   | 30        | 99      | Self-report                   | Physician diagnosis; Administrative medical records or disease registries; Biomarker | Morbidity             | N/A         | N/A     | N/A    | N/A               | N/A          | 59    | 242      | Community    | Home              | Family (anyone in household)      | Never smokers  |
| Tracheal, bronchus, and lung cancer | Fontham 1994   | N/A                                                                                                 | Case-control       | United States of America                                              | Female | 20        | 79      | Self-report; Proxy respondent | Administrative medical records or disease registries                                 | Morbidity & Mortality | N/A         | N/A     | N/A    | N/A               | N/A          | 1,262 | 2,500    | Community    | Home; Work        | Family (anyone in household); Any | Never smokers  |

**Table S3. Summary of study characteristics**

| Health outcome                      | Author-Year           | Study name | Study design | Location                                                                       | Sex    | Age start | Age end | Exposure assessment           | Outcome assessment                                              | Endpoint              | Sample size | Exposed | Events | Follow-up (years) | Person-years | Cases | Controls | Control pool | Exposure location | Exposure source                        | Smoking status     |
|-------------------------------------|-----------------------|------------|--------------|--------------------------------------------------------------------------------|--------|-----------|---------|-------------------------------|-----------------------------------------------------------------|-----------------------|-------------|---------|--------|-------------------|--------------|-------|----------|--------------|-------------------|----------------------------------------|--------------------|
| Tracheal, bronchus, and lung cancer | Franco-Marina 2006    | N/A        | Case-control | Mexico City, México                                                            | Both   | 47        | 102     | Self-report                   | Administrative medical records or disease registries            | Morbidity             | N/A         | N/A     | N/A    | N/A               | N/A          | 385   | 898      | Community    | Home              | Family (anyone in household)           | Any smoking status |
| Tracheal, bronchus, and lung cancer | Galeone 2008          | N/A        | Case-control | Heilongjiang                                                                   | Both   | 18        | 99      | Self-report                   | Administrative medical records or disease registries            | Morbidity             | N/A         | N/A     | N/A    | N/A               | N/A          | 60    | 216      | Hospital     | Home and work     | Any                                    | Never smokers      |
| Tracheal, bronchus, and lung cancer | Gallegos-Arreola 2008 | N/A        | Case-control | Jalisco                                                                        | Both   | 18        | 88      | Self-report                   | Administrative medical records or disease registries            | Morbidity             | N/A         | N/A     | N/A    | N/A               | N/A          | 32    | 138      | Community    | Other             | Any                                    | Never smokers      |
| Tracheal, bronchus, and lung cancer | Gao 1987              | N/A        | Case-control | Shanghai                                                                       | Female | 35        | 69      | Self-report                   | Administrative medical records or disease registries            | Morbidity             | N/A         | N/A     | N/A    | N/A               | N/A          | 672   | 735      | Community    | Home              | Family (anyone in household)           | Any smoking status |
| Tracheal, bronchus, and lung cancer | Garfinkel 1985        | N/A        | Case-control | United States of America                                                       | Female | 40        | 99      | Self-report; Proxy respondent | Administrative medical records or disease registries            | Morbidity & Mortality | N/A         | N/A     | N/A    | N/A               | N/A          | 134   | 402      | Hospital     | Home              | Spouse                                 | Never smokers      |
| Tracheal, bronchus, and lung cancer | Ger 1993              | N/A        | Case-control | Taiwan (Province of China)                                                     | Both   | 18        | 99      | Self-report                   | Biomarker                                                       | Morbidity             | N/A         | N/A     | N/A    | N/A               | N/A          | 131   | 262      | Hospital     | Home; Work        | Spouse; Other family (not spouse); Any | Any smoking status |
| Tracheal, bronchus, and lung cancer | Gorlova 2008          | N/A        | Case-control | Texas                                                                          | Both   | 18        | 99      | Self-report                   | Administrative medical records or disease registries            | Morbidity             | N/A         | N/A     | N/A    | N/A               | N/A          | 266   | 428      | Hospital     | Home or work      | Any                                    | Never smokers      |
| Tracheal, bronchus, and lung cancer | Han 2017              | N/A        | Case-control | Hong Kong Special Administrative Region of China; Macao Special Administrative | Both   | 19        | 99      | Self-report                   | Administrative medical records or disease registries; Biomarker | Morbidity             | N/A         | N/A     | N/A    | N/A               | N/A          | 99    | 99       | Community    | Home; Work        | Family (anyone in household); Any      | Never smokers      |

**Table S3. Summary of study characteristics**

| Health outcome                      | Author-Year            | Study name                               | Study design       | Location           | Sex    | Age start | Age end | Exposure assessment | Outcome assessment                                                                  | Endpoint  | Sample size | Exposed | Events | Follow-up (years) | Person-years | Cases | Controls | Control pool | Exposure location | Exposure source              | Smoking status     |
|-------------------------------------|------------------------|------------------------------------------|--------------------|--------------------|--------|-----------|---------|---------------------|-------------------------------------------------------------------------------------|-----------|-------------|---------|--------|-------------------|--------------|-------|----------|--------------|-------------------|------------------------------|--------------------|
|                                     |                        |                                          |                    | ve Region of China |        |           |         |                     |                                                                                     |           |             |         |        |                   |              |       |          |              |                   |                              |                    |
| Tracheal, bronchus, and lung cancer | Hansen 2021            | Norwegian Women and Cancer (NOWAC) Study | Prospective cohort | Norway             | Female | 31        | 70      | Self-report         | Administrative medical records or disease registries                                | Incidence | 43,713      | 25,082  | 96     | 15.9              | 708,075      | N/A   | N/A      | N/A          | Home              | Family (anyone in household) | Never smokers      |
| Tracheal, bronchus, and lung cancer | He 2012                | N/A                                      | Prospective cohort | Shaanxi            | Both   | 51.5      | 87.8    | Self-report         | Death certificates; Administrative medical records or disease registries; Biomarker | Mortality | 910         | 611     | 16     | 15.4              | N/A          | N/A   | N/A      | N/A          | Home or work      | Any                          | Never smokers      |
| Tracheal, bronchus, and lung cancer | He 2013                | N/A                                      | Case-control       | Fujian             | Both   | 18        | 99      | Self-report         | Physician diagnosis                                                                 | Morbidity | N/A         | N/A     | N/A    | N/A               | N/A          | 507   | 662      | Community    | Home or work      | Any                          | Any smoking status |
| Tracheal, bronchus, and lung cancer | He 2017                | N/A                                      | Case-control       | Fujian             | Female | 40        | 99      | Self-report         | Administrative medical records or disease registries; Biomarker                     | Morbidity | N/A         | N/A     | N/A    | N/A               | N/A          | 292   | 202      | Hospital     | Home or work      | Any                          | Any smoking status |
| Tracheal, bronchus, and lung cancer | Hernández-Garduño 2004 | N/A                                      | Case-control       | Mexico             | Female | 44        | 93      | Self-report         | Administrative medical records or disease registries                                | Morbidity | N/A         | N/A     | N/A    | N/A               | N/A          | 113   | 273      | Hospital     | Home              | Family (anyone in household) | Never smokers      |
| Tracheal, bronchus, and lung cancer | Hill 2007              | New Zealand Census Mortality Study       | Prospective cohort | New Zealand        | Both   | 45        | 74      | Self-report         | Death certificates                                                                  | Mortality | 320,931     | 53,469  | 207    | 3                 | 952,726      | N/A   | N/A      | N/A          | Home              | Family (anyone in household) | Never smokers      |
| Tracheal, bronchus, and lung cancer | Hirayama 1984          | N/A                                      | Prospective cohort | Japan              | Both   | 40        | 99      | Self-report         | Death certificates                                                                  | Mortality | 80,156      | 38,982  | 183    | 16                | N/A          | N/A   | N/A      | N/A          | Home              | Spouse                       | Never smokers      |
| Tracheal, bronchus,                 | Hole 1989              | N/A                                      | Prospective cohort | Scotland           | Both   | 45        | 64      | Self-report         | Administrative medical records or                                                   | Mortality | 1,784       | 1,295   | 6      | 11.5              | N/A          | N/A   | N/A      | N/A          | Home              | Family (anyone in household) | Never smokers      |

**Table S3. Summary of study characteristics**

| Health outcome                      | Author-Year   | Study name                                   | Study design       | Location                 | Sex    | Age start | Age end | Exposure assessment           | Outcome assessment                                   | Endpoint              | Sample size | Exposed | Events | Follow-up (years) | Person-years | Cases | Controls | Control pool | Exposure location | Exposure source                   | Smoking status                 |
|-------------------------------------|---------------|----------------------------------------------|--------------------|--------------------------|--------|-----------|---------|-------------------------------|------------------------------------------------------|-----------------------|-------------|---------|--------|-------------------|--------------|-------|----------|--------------|-------------------|-----------------------------------|--------------------------------|
| and lung cancer                     |               |                                              |                    |                          |        |           |         |                               | disease registries; Death certificates               |                       |             |         |        |                   |              |       |          |              |                   |                                   |                                |
| Tracheal, bronchus, and lung cancer | Humble 1987   | N/A                                          | Case-control       | New Mexico               | Both   | 18        | 84      | Self-report; Proxy respondent | Administrative medical records or disease registries | Morbidity & Mortality | N/A         | N/A     | N/A    | N/A               | N/A          | 28    | 292      | Community    | Home              | Spouse                            | Never smokers                  |
| Tracheal, bronchus, and lung cancer | Janerich 1990 | N/A                                          | Case-control       | New York                 | Both   | 20        | 80      | Self-report                   | Administrative medical records or disease registries | Morbidity             | N/A         | N/A     | N/A    | N/A               | N/A          | 129   | 129      | Community    | Home              | Spouse                            | Never smokers                  |
| Tracheal, bronchus, and lung cancer | Jee 1999      | N/A                                          | Prospective cohort | Republic of Korea        | Female | 40        | 88      | Self-report                   | Administrative medical records or disease registries | Incidence             | 120,634     | 84,525  | 63     | 3.5               | N/A          | N/A   | N/A      | N/A          | Home              | Spouse                            | Never smokers                  |
| Tracheal, bronchus, and lung cancer | Jin 2014      | N/A                                          | Case-control       | Jiangsu                  | Both   | 18        | 99      | Self-report                   | Administrative medical records or disease registries | Morbidity             | N/A         | N/A     | N/A    | N/A               | N/A          | 1,424 | 4,543    | Community    | Home              | Family (anyone in household)      | Any smoking status             |
| Tracheal, bronchus, and lung cancer | Johnson 2001  | National Enhanced Cancer Surveillance System | Case-control       | Canada                   | Female | 20        | 75      | Self-report                   | Administrative medical records or disease registries | Morbidity             | N/A         | N/A     | N/A    | N/A               | N/A          | 79    | 840      | Community    | Home and work     | Any                               | Never smokers                  |
| Tracheal, bronchus, and lung cancer | Jöckel 1998   | N/A                                          | Case-control       | Germany                  | Both   | 31        | 42      | Self-report                   | Physician diagnosis; Biomarker                       | Morbidity             | N/A         | N/A     | N/A    | N/A               | N/A          | 71    | 276      | Community    | Home              | Spouse                            | Non-smokers (former and never) |
| Tracheal, bronchus, and lung cancer | Kabat 1984    | N/A                                          | Case-control       | United States of America | Both   | 18        | 99      | Self-report                   | Administrative medical records or disease registries | Morbidity             | N/A         | N/A     | N/A    | N/A               | N/A          | 78    | 78       | Hospital     | Home; Work        | Family (anyone in household); Any | Never smokers                  |
| Tracheal, bronchus, and lung cancer | Kabat 1995    | N/A                                          | Case-control       | New York; Illinois;      | Both   | 20        | 80      | Self-report                   | Administrative medical records or                    | Morbidity             | N/A         | N/A     | N/A    | N/A               | N/A          | 106   | 271      | Hospital     | Home              | Spouse                            | Never smokers                  |

**Table S3. Summary of study characteristics**

| Health outcome                      | Author-Year    | Study name                                                                      | Study design       | Location                                                         | Sex    | Age start | Age end | Exposure assessment | Outcome assessment                                                        | Endpoint              | Sample size | Exposed | Events | Follow-up (years) | Person-years | Cases | Controls | Control pool | Exposure location | Exposure source              | Smoking status     |
|-------------------------------------|----------------|---------------------------------------------------------------------------------|--------------------|------------------------------------------------------------------|--------|-----------|---------|---------------------|---------------------------------------------------------------------------|-----------------------|-------------|---------|--------|-------------------|--------------|-------|----------|--------------|-------------------|------------------------------|--------------------|
| and lung cancer                     |                |                                                                                 |                    | Michigan; Pennsylvania                                           |        |           |         |                     | disease registries; Biomarker                                             |                       |             |         |        |                   |              |       |          |              |                   |                              |                    |
| Tracheal, bronchus, and lung cancer | Kabat 1996     | N/A                                                                             | Case-control       | United States of America                                         | Both   | 20        | 80      | Self-report         | Physician diagnosis; Biomarker                                            | Morbidity             | N/A         | N/A     | N/A    | N/A               | N/A          | 106   | 271      | Hospital     | Home              | Spouse                       | Never smokers      |
| Tracheal, bronchus, and lung cancer | Kalandidi 1990 | N/A                                                                             | Case-control       | Greece                                                           | Female | 35        | 99      | Self-report         | Biomarker                                                                 | Morbidity             | N/A         | N/A     | N/A    | N/A               | N/A          | 91    | 120      | Hospital     | Home              | Spouse                       | Never smokers      |
| Tracheal, bronchus, and lung cancer | Koo 1987       | N/A                                                                             | Case-control       | Hong Kong Special Administrative Region of China                 | Female | 18        | 99      | Self-report         | Administrative medical records or disease registries                      | Morbidity             | N/A         | N/A     | N/A    | N/A               | N/A          | 113   | 183      | Community    | Home              | Family (anyone in household) | Never smokers      |
| Tracheal, bronchus, and lung cancer | Kurahashi 2008 | Japan Public Health Center-based Prospective Study (JPHC Study) cohorts 1 and 2 | Prospective cohort | Akita; Iwate; Nagano; Okinawa; Ibaraki; Niigata; Kochi; Nagasaki | Female | 40        | 69      | Self-report         | Administrative medical records or disease registries; Death certificates  | Incidence & Mortality | N/A         | N/A     | 106    | 13.3              | 380,049      | N/A   | N/A      | N/A          | Home; Work        | Spouse; Any                  | Never smokers      |
| Tracheal, bronchus, and lung cancer | Lam 1987       | N/A                                                                             | Case-control       | Hong Kong Special Administrative Region of China                 | Female | 18        | 99      | Self-report         | Physician diagnosis; Biomarker                                            | Morbidity             | N/A         | N/A     | N/A    | N/A               | N/A          | 199   | 335      | Community    | Home              | Spouse                       | Never smokers      |
| Tracheal, bronchus, and lung cancer | Lan 2008       | N/A                                                                             | Case-control       | Yunnan                                                           | Both   | 18        | 85      | Self-report         | Physician diagnosis; Biomarker                                            | Morbidity             | N/A         | N/A     | N/A    | N/A               | N/A          | 498   | 498      | Community    | Home              | Family (anyone in household) | Any smoking status |
| Tracheal, bronchus, and lung cancer | Lee 1986       | N/A                                                                             | Case-control       | England                                                          | Both   | 35        | 74      | Self-report         | Physician diagnosis; Administrative medical records or disease registries | Morbidity             | N/A         | N/A     | N/A    | N/A               | N/A          | 47    | 96       | Hospital     | Home              | Spouse                       | Never smokers      |

**Table S3. Summary of study characteristics**

| Health outcome                      | Author-Year  | Study name | Study design       | Location                   | Sex    | Age start | Age end | Exposure assessment | Outcome assessment                                                                   | Endpoint  | Sample size | Exposed | Events | Follow-up (years) | Person-years | Cases | Controls | Control pool | Exposure location | Exposure source                        | Smoking status     |
|-------------------------------------|--------------|------------|--------------------|----------------------------|--------|-----------|---------|---------------------|--------------------------------------------------------------------------------------|-----------|-------------|---------|--------|-------------------|--------------|-------|----------|--------------|-------------------|----------------------------------------|--------------------|
| Tracheal, bronchus, and lung cancer | Lee 2000     | N/A        | Case-control       | Taiwan (Province of China) | Female | 18        | 99      | Self-report         | Administrative medical records or disease registries; Biomarker                      | Morbidity | N/A         | N/A     | N/A    | N/A               | N/A          | 931   | 1,496    | Hospital     | Home; Work        | Spouse; Other family (not spouse); Any | Never smokers      |
| Tracheal, bronchus, and lung cancer | Li 2002      | N/A        | Case-cohort        | Shanghai                   | Both   | 24        | 78      | Self-report         | Administrative medical records or disease registries                                 | Mortality | 88          | 37      | 9      | 24                | N/A          | N/A   | N/A      | N/A          | Work              | Any                                    | Never smokers      |
| Tracheal, bronchus, and lung cancer | Li 2020      | N/A        | Prospective cohort | Shanghai                   | Both   | 23        | 79      | Self-report         | Administrative medical records or disease registries                                 | Incidence | 17,789      | 9,110   | 152    | 9.1               | 156,566      | N/A   | N/A      | N/A          | Home or work      | Any                                    | Never smokers      |
| Tracheal, bronchus, and lung cancer | Liang 2009   | N/A        | Case-control       | Liaoning                   | Female | 20        | 80      | Self-report         | Physician diagnosis                                                                  | Morbidity | N/A         | N/A     | N/A    | N/A               | N/A          | 226   | 279      | Community    | Other             | Any                                    | Never smokers      |
| Tracheal, bronchus, and lung cancer | Liang 2019   | N/A        | Case-control       | Hebei                      | Both   | 15        | 99      | Self-report         | Administrative medical records or disease registries; Biomarker                      | Morbidity | N/A         | N/A     | N/A    | N/A               | N/A          | 1,013 | 1,340    | Hospital     | Work; Home        | Any; Family (anyone in household)      | Never smokers      |
| Tracheal, bronchus, and lung cancer | Liu 1991     | N/A        | Case-control       | Yunnan                     | Female | 18        | 99      | Self-report         | Biomarker; Administrative medical records or disease registries                      | Morbidity | N/A         | N/A     | N/A    | N/A               | N/A          | 54    | 202      | Community    | Home              | Family (anyone in household)           | Any smoking status |
| Tracheal, bronchus, and lung cancer | Masjedi 2013 | N/A        | Case-control       | Tehran                     | Both   | 18        | 99      | Self-report         | Physician diagnosis; Administrative medical records or disease registries; Biomarker | Morbidity | N/A         | N/A     | N/A    | N/A               | N/A          | 81    | 289      | Hospital     | Other             | Any                                    | Unspecified        |

**Table S3. Summary of study characteristics**

| Health outcome                      | Author-Year     | Study name                                                                                    | Study design       | Location                                         | Sex    | Age start | Age end | Exposure assessment | Outcome assessment                                                                   | Endpoint  | Sample size | Exposed | Events | Follow-up (years) | Person-years | Cases | Controls | Control pool | Exposure location | Exposure source              | Smoking status     |
|-------------------------------------|-----------------|-----------------------------------------------------------------------------------------------|--------------------|--------------------------------------------------|--------|-----------|---------|---------------------|--------------------------------------------------------------------------------------|-----------|-------------|---------|--------|-------------------|--------------|-------|----------|--------------|-------------------|------------------------------|--------------------|
| Tracheal, bronchus, and lung cancer | Mbeje 2022      | N/A                                                                                           | Case-control       | KwaZulu-Natal                                    | Both   | 21        | 99      | Self-report         | Self-report                                                                          | Morbidity | N/A         | N/A     | N/A    | N/A               | N/A          | 75    | 159      | Hospital     | Home or work      | Any                          | Any smoking status |
| Tracheal, bronchus, and lung cancer | McGhee 2005     | N/A                                                                                           | Case-control       | Hong Kong Special Administrative Region of China | Both   | 60        | 99      | Proxy respondent    | Death certificates                                                                   | Mortality | N/A         | N/A     | N/A    | N/A               | N/A          | 524   | 763      | Community    | Home              | Family (anyone in household) | Never smokers      |
| Tracheal, bronchus, and lung cancer | Miller 2003     | N/A                                                                                           | Case-control       | Massachusetts                                    | Both   | 27        | 96      | Self-report         | Physician diagnosis; Biomarker                                                       | Morbidity | N/A         | N/A     | N/A    | N/A               | N/A          | 56    | 408      | Hospital     | Other             | Any                          | Never smokers      |
| Tracheal, bronchus, and lung cancer | Minichilli 2022 | PROTOS (Pulmonary cancer and Risk factors for Tumors, Observational Study) Case-Control Study | Case-control       | Puglia                                           | Both   | 18        | 99      | Self-report         | Biomarker                                                                            | Morbidity | N/A         | N/A     | N/A    | N/A               | N/A          | 351   | 1,053    | Community    | Other             | Any                          | Any smoking status |
| Tracheal, bronchus, and lung cancer | Ng 2005         | N/A                                                                                           | Case-control       | Singapore                                        | Female | 18        | 99      | Self-report         | Physician diagnosis; Administrative medical records or disease registries; Biomarker | Morbidity | N/A         | N/A     | N/A    | N/A               | N/A          | 190   | 237      | Hospital     | Home              | Family (anyone in household) | Never smokers      |
| Tracheal, bronchus, and lung cancer | Nishino 2001    | N/A                                                                                           | Prospective cohort | Miyagi                                           | Female | 40        | 99      | Self-report         | Administrative medical records or disease registries                                 | Incidence | N/A         | N/A     | 14     | 7.6               | 38,112       | N/A   | N/A      | N/A          | Home              | Family (anyone in household) | Never smokers      |
| Tracheal, bronchus, and lung cancer | Phukan 2014     | N/A                                                                                           | Case-control       | Mizoram                                          | Female | 18        | 99      | Self-report         | Administrative medical records or disease registries; Biomarker                      | Morbidity | N/A         | N/A     | N/A    | N/A               | N/A          | 230   | 460      | Community    | Home              | Family (anyone in household) | Any smoking status |

**Table S3. Summary of study characteristics**

| Health outcome                      | Author-Year   | Study name          | Study design       | Location                | Sex    | Age start | Age end | Exposure assessment | Outcome assessment                                                | Endpoint  | Sample size | Exposed | Events | Follow-up (years) | Person-years | Cases | Controls | Control pool | Exposure location | Exposure source                   | Smoking status                 |
|-------------------------------------|---------------|---------------------|--------------------|-------------------------|--------|-----------|---------|---------------------|-------------------------------------------------------------------|-----------|-------------|---------|--------|-------------------|--------------|-------|----------|--------------|-------------------|-----------------------------------|--------------------------------|
| Tracheal, bronchus, and lung cancer | Pirie 2016    | Million Women Study | Prospective cohort | United Kingdom          | Female | 50        | 84      | Self-report         | Administrative medical records or disease registries              | Incidence | 342,217     | 42,940  | 125    | 14                | N/A          | N/A   | N/A      | N/A          | Home              | Family (anyone in household)      | Never smokers                  |
| Tracheal, bronchus, and lung cancer | Rapiti 1999   | N/A                 | Case-control       | Other Union Territories | Both   | 18        | 99      | Self-report         | Physician diagnosis; Biomarker                                    | Morbidity | N/A         | N/A     | N/A    | N/A               | N/A          | 56    | 106      | Hospital     | Home              | Spouse                            | Never smokers                  |
| Tracheal, bronchus, and lung cancer | Raspanti 2016 | N/A                 | Case-control       | Nepal                   | Both   | 18        | 99      | Self-report         | Administrative medical records or disease registries; Biomarker   | Morbidity | N/A         | N/A     | N/A    | N/A               | N/A          | 174   | 150      | Hospital     | Home or work      | Any                               | Any smoking status             |
| Tracheal, bronchus, and lung cancer | Ren 2013      | N/A                 | Case-control       | Liaoning                | Female | 18        | 99      | Self-report         | Physician diagnosis; Biomarker                                    | Morbidity | N/A         | N/A     | N/A    | N/A               | N/A          | 764   | 983      | Hospital     | Other             | Any                               | Never smokers                  |
| Tracheal, bronchus, and lung cancer | Robles 2014   | Mayo Clinic study   | Case-control       | Minnesota               | Both   | 18        | 99      | Self-report         | Self-report; Administrative medical records or disease registries | Morbidity | N/A         | N/A     | N/A    | N/A               | N/A          | 321   | 179      | Community    | Other             | Any                               | Never smokers                  |
| Tracheal, bronchus, and lung cancer | Rylander 2006 | N/A                 | Case-control       | Sweden                  | Both   | 18        | 75      | Self-report         | Administrative medical records or disease registries              | Morbidity | N/A         | N/A     | N/A    | N/A               | N/A          | 152   | 652      | Community    | Work              | Any                               | Non-smokers (former and never) |
| Tracheal, bronchus, and lung cancer | Sasco 2002    | N/A                 | Case-control       | Morocco                 | Both   | 34        | 82      | Self-report         | Physician diagnosis; Biomarker                                    | Morbidity | N/A         | N/A     | N/A    | N/A               | N/A          | 118   | 235      | Hospital     | Home or work      | Any                               | Any smoking status             |
| Tracheal, bronchus, and lung cancer | Schwartz 2007 | N/A                 | Case-control       | Michigan                | Female | 18        | 74      | Self-report         | Administrative medical records or disease registries              | Morbidity | N/A         | N/A     | N/A    | N/A               | N/A          | 487   | 993      | Community    | Home; Work        | Family (anyone in household); Any | Any smoking status             |
| Tracheal, bronchus,                 | Seki 2013     | N/A                 | Case-control       | Miyagi                  | Both   | 30        | 99      | Self-report         | Administrative medical                                            | Morbidity | N/A         | N/A     | N/A    | N/A               | N/A          | 362   | 2,410    | Hospital     | Home              | Spouse                            | Never smokers                  |



**Table S3. Summary of study characteristics**

| Health outcome                      | Author-Year    | Study name                              | Study design       | Location                 | Sex    | Age start | Age end | Exposure assessment           | Outcome assessment                                                                    | Endpoint              | Sample size | Exposed | Events | Follow-up (years) | Person-years | Cases | Controls | Control pool | Exposure location | Exposure source              | Smoking status     |
|-------------------------------------|----------------|-----------------------------------------|--------------------|--------------------------|--------|-----------|---------|-------------------------------|---------------------------------------------------------------------------------------|-----------------------|-------------|---------|--------|-------------------|--------------|-------|----------|--------------|-------------------|------------------------------|--------------------|
| and lung cancer                     |                |                                         |                    |                          |        |           |         |                               | records or disease registries                                                         |                       |             |         |        |                   |              |       |          |              |                   |                              |                    |
| Tracheal, bronchus, and lung cancer | Shen 1998      | N/A                                     | Case-control       | Jiangsu                  | Female | 18        | 99      | Self-report                   | Administrative medical records or disease registries                                  | Morbidity             | N/A         | N/A     | N/A    | N/A               | N/A          | 70    | 70       | Community    | Home              | Family (anyone in household) | Never smokers      |
| Tracheal, bronchus, and lung cancer | Sloan 2012     | New England Lung Cancer Study (NELCS)   | Case-control       | New Hampshire; Vermont   | Both   | 30        | 74      | Self-report                   | Administrative medical records or disease registries                                  | Morbidity             | N/A         | N/A     | N/A    | N/A               | N/A          | 441   | 300      | Community    | Home              | Family (anyone in household) | Any smoking status |
| Tracheal, bronchus, and lung cancer | Sobue 1990     | N/A                                     | Case-control       | Ōsaka                    | Female | 40        | 79      | Self-report                   | Administrative medical records or disease registries                                  | Morbidity             | N/A         | N/A     | N/A    | N/A               | N/A          | 144   | 731      | Hospital     | Home              | Other family (not spouse)    | Never smokers      |
| Tracheal, bronchus, and lung cancer | Speizer 1999   | Nurses' Health Study                    | Prospective cohort | United States of America | Female | 30        | 55      | Self-report                   | Self-report; Death certificates; Administrative medical records or disease registries | Incidence & Mortality | N/A         | N/A     | 35     | 15.2              | 776,300      | N/A   | N/A      | N/A          | Other             | Any                          | Never smokers      |
| Tracheal, bronchus, and lung cancer | Spitz 2011     | N/A                                     | Case-control       | Texas                    | Both   | 18        | 99      | Self-report                   | Administrative medical records or disease registries                                  | Morbidity             | N/A         | N/A     | N/A    | N/A               | N/A          | 335   | 368      | Hospital     | Other             | Any                          | Never smokers      |
| Tracheal, bronchus, and lung cancer | Stockwell 1992 | N/A                                     | Case-control       | Florida                  | Female | 18        | 99      | Self-report; Proxy respondent | Administrative medical records or disease registries                                  | Morbidity & Mortality | N/A         | N/A     | N/A    | N/A               | N/A          | 108   | 174      | Community    | Home              | Spouse                       | Never smokers      |
| Tracheal, bronchus, and lung cancer | Sun 2017       | Nord-Trøndelag Health Survey 2 (HUNT 2) | Prospective cohort | Trøndelag                | Both   | 20        | 99      | Self-report                   | Administrative medical records or disease registries                                  | Incidence             | N/A         | N/A     | 670    | 16.8              | N/A          | N/A   | N/A      | N/A          | Home              | Family (anyone in household) | Any smoking status |

**Table S3. Summary of study characteristics**

| Health outcome                      | Author-Year       | Study name                                                          | Study design       | Location                                               | Sex    | Age start | Age end | Exposure assessment | Outcome assessment                                                                   | Endpoint              | Sample size | Exposed | Events | Follow-up (years) | Person-years | Cases | Controls | Control pool | Exposure location         | Exposure source                   | Smoking status                 |
|-------------------------------------|-------------------|---------------------------------------------------------------------|--------------------|--------------------------------------------------------|--------|-----------|---------|---------------------|--------------------------------------------------------------------------------------|-----------------------|-------------|---------|--------|-------------------|--------------|-------|----------|--------------|---------------------------|-----------------------------------|--------------------------------|
| Tracheal, bronchus, and lung cancer | Svensson 1989     | N/A                                                                 | Case-control       | Sweden                                                 | Female | 18        | 99      | Self-report         | Administrative medical records or disease registries; Physician diagnosis; Biomarker | Morbidity             | N/A         | N/A     | N/A    | N/A               | N/A          | 27    | 150      | Hospital     | Home or work              | Any                               | Never smokers                  |
| Tracheal, bronchus, and lung cancer | Torres-Durán 2015 | N/A                                                                 | Case-control       | Spain                                                  | Both   | 34        | 90      | Self-report         | Physician diagnosis                                                                  | Morbidity             | N/A         | N/A     | N/A    | N/A               | N/A          | 212   | 317      | Hospital     | Home                      | Family (anyone in household)      | Never smokers                  |
| Tracheal, bronchus, and lung cancer | Tubío-Pérez 2022  | N/A                                                                 | Case-control       | Spain                                                  | Both   | 36        | 99      | Self-report         | Biomarker                                                                            | Morbidity             | N/A         | N/A     | N/A    | N/A               | N/A          | 382   | 505      | Hospital     | Home                      | Family (anyone in household)      | Never smokers                  |
| Tracheal, bronchus, and lung cancer | Veglia 2007       | European Prospective Investigation into Cancer and Nutrition (EPIC) | Prospective cohort | Spain; Italy; Denmark; United Kingdom; Greece; Germany | Both   | 35        | 74      | Self-report         | Administrative medical records or disease registries; Death certificates             | Incidence & Mortality | 217,055     | N/A     | 809    | 6.1               | N/A          | N/A   | N/A      | N/A          | Work                      | Any                               | Unspecified                    |
| Tracheal, bronchus, and lung cancer | Villeneuve 2014   | N/A                                                                 | Case-control       | Canada                                                 | Both   | 20        | 84      | Self-report         | Physician diagnosis; Administrative medical records or disease registries; Biomarker | Morbidity             | N/A         | N/A     | N/A    | N/A               | N/A          | 409   | 374      | Community    | Home; Work; Home and work | Family (anyone in household); Any | Any smoking status             |
| Tracheal, bronchus, and lung cancer | Wang 1994         | N/A                                                                 | Case-control       | Heilongjiang                                           | Female | 30        | 69      | Self-report         | Administrative medical records or disease registries                                 | Morbidity             | N/A         | N/A     | N/A    | N/A               | N/A          | 55    | 55       | Hospital     | Home                      | Family (anyone in household)      | Non-smokers (former and never) |
| Tracheal, bronchus, and lung cancer | Wang 1996         | N/A                                                                 | Case-control       | Guangdong                                              | Both   | 32        | 78      | Self-report         | Physician diagnosis; Biomarker                                                       | Morbidity             | N/A         | N/A     | N/A    | N/A               | N/A          | 390   | 390      | Hospital     | Home; Work                | Family (anyone in household); Any | Any smoking status             |

**Table S3. Summary of study characteristics**

| Health outcome                      | Author-Year   | Study name                                             | Study design       | Location                                         | Sex    | Age start | Age end | Exposure assessment | Outcome assessment                                                                   | Endpoint  | Sample size | Exposed | Events | Follow-up (years) | Person-years | Cases | Controls | Control pool | Exposure location           | Exposure source                   | Smoking status                 |
|-------------------------------------|---------------|--------------------------------------------------------|--------------------|--------------------------------------------------|--------|-----------|---------|---------------------|--------------------------------------------------------------------------------------|-----------|-------------|---------|--------|-------------------|--------------|-------|----------|--------------|-----------------------------|-----------------------------------|--------------------------------|
| Tracheal, bronchus, and lung cancer | Wang 1996     | N/A                                                    | Case-control       | Liaoning                                         | Female | 35        | 69      | Self-report         | Administrative medical records or disease registries; Biomarker; Physician diagnosis | Morbidity | N/A         | N/A     | N/A    | N/A               | N/A          | 135   | 135      | Community    | Work                        | Any                               | Never smokers                  |
| Tracheal, bronchus, and lung cancer | Wang 2009     | N/A                                                    | Case-control       | Hong Kong Special Administrative Region of China | Female | 30        | 79      | Self-report         | Physician diagnosis; Biomarker                                                       | Morbidity | N/A         | N/A     | N/A    | N/A               | N/A          | 243   | 338      | Community    | Home or work; Home and work | Any                               | Never smokers                  |
| Tracheal, bronchus, and lung cancer | Wang 2015     | Women's Health Initiative Observational Study (WHI-OS) | Prospective cohort | United States of America                         | Female | 50        | 79      | Self-report         | Self-report; Administrative medical records or disease registries                    | Incidence | 39,771      | 51,524  | 152    | 10.5              | N/A          | N/A   | N/A      | N/A          | Home; Work                  | Family (anyone in household); Any | Never smokers                  |
| Tracheal, bronchus, and lung cancer | Weiss 2008    | Shanghai Women's Health Study                          | Prospective cohort | Shanghai                                         | Female | 40        | 70      | Self-report         | Administrative medical records or disease registries                                 | Incidence | N/A         | N/A     | 198    | 4.1               | 506,522      | N/A   | N/A      | N/A          | Home or work                | Family (anyone in household)      | Non-smokers (former and never) |
| Tracheal, bronchus, and lung cancer | Wen 2006      | Shanghai Women's Health Study                          | Prospective cohort | Shanghai                                         | Female | 40        | 70      | Self-report         | Administrative medical records or disease registries; Death certificates             | Mortality | 65,180      | 39,795  | 157    | 5.7               | N/A          | N/A   | N/A      | N/A          | Home                        | Spouse                            | Never smokers                  |
| Tracheal, bronchus, and lung cancer | Wenzlaff 2005 | N/A                                                    | Case-control       | Michigan                                         | Both   | 18        | 99      | Self-report         | Administrative medical records or disease registries                                 | Morbidity | N/A         | N/A     | N/A    | N/A               | N/A          | 155   | 181      | Hospital     | Home                        | Family (anyone in household)      | Never smokers                  |
| Tracheal, bronchus, and lung cancer | Wu 1985       | N/A                                                    | Case-control       | California                                       | Female | 18        | 75      | Self-report         | Administrative medical records or disease registries                                 | Morbidity | N/A         | N/A     | N/A    | N/A               | N/A          | N/A   | N/A      | Community    | Home; Work                  | Spouse; Any                       | Any smoking status             |

**Table S3. Summary of study characteristics**

| Health outcome                      | Author-Year    | Study name                                                   | Study design | Location                   | Sex    | Age start | Age end | Exposure assessment | Outcome assessment                                                                   | Endpoint  | Sample size | Exposed | Events | Follow-up (years) | Person-years | Cases | Controls | Control pool | Exposure location | Exposure source                        | Smoking status     |
|-------------------------------------|----------------|--------------------------------------------------------------|--------------|----------------------------|--------|-----------|---------|---------------------|--------------------------------------------------------------------------------------|-----------|-------------|---------|--------|-------------------|--------------|-------|----------|--------------|-------------------|----------------------------------------|--------------------|
| Tracheal, bronchus, and lung cancer | Xu 2020        | N/A                                                          | Case-control | Fujian                     | Both   | 18        | 99      | Self-report         | Biomarker                                                                            | Morbidity | N/A         | N/A     | N/A    | N/A               | N/A          | 449   | 512      | Community    | Other             | Any                                    | Any smoking status |
| Tracheal, bronchus, and lung cancer | Yang 2015      | N/A                                                          | Case-control | Guangdong; Jiangsu         | Both   | 18        | 99      | Self-report         | Physician diagnosis; Administrative medical records or disease registries; Biomarker | Morbidity | N/A         | N/A     | N/A    | N/A               | N/A          | 354   | 364      | Community    | Home              | Family (anyone in household)           | Never smokers      |
| Tracheal, bronchus, and lung cancer | Yang 2016      | Genetic Epidemiological Study of Lung Adenocarcinoma (GELAC) | Case-control | Taiwan (Province of China) | Both   | 18        | 99      | Self-report         | Administrative medical records or disease registries; Biomarker                      | Morbidity | N/A         | N/A     | N/A    | N/A               | N/A          | 709   | 726      | Hospital     | Other             | Any                                    | Any smoking status |
| Tracheal, bronchus, and lung cancer | Yin 2014       | N/A                                                          | Case-control | Liaoning                   | Female | 18        | 99      | Self-report         | Physician diagnosis; Biomarker                                                       | Morbidity | N/A         | N/A     | N/A    | N/A               | N/A          | 306   | 318      | Hospital     | Other             | Any                                    | Never smokers      |
| Tracheal, bronchus, and lung cancer | Yoon 2008      | N/A                                                          | Case-control | Republic of Korea          | Female | 30        | 71      | Self-report         | Biomarker                                                                            | Morbidity | N/A         | N/A     | N/A    | N/A               | N/A          | 213   | 213      | Hospital     | Home; Work        | Spouse; Paternal; Maternal; Any        | Never smokers      |
| Tracheal, bronchus, and lung cancer | Zaridze 1998   | N/A                                                          | Case-control | Moscow City                | Female | 18        | 99      | Self-report         | Administrative medical records or disease registries; Biomarker                      | Morbidity | N/A         | N/A     | N/A    | N/A               | N/A          | 189   | 358      | Hospital     | Home; Work        | Spouse; Other family (not spouse); Any | Never smokers      |
| Tracheal, bronchus, and lung cancer | Zatloukal 2003 | N/A                                                          | Case-control | Czechia                    | Female | 25        | 89      | Self-report         | Administrative medical records or disease registries; Biomarker                      | Morbidity | N/A         | N/A     | N/A    | N/A               | N/A          | 74    | 889      | Hospital     | Other             | Any                                    | Never smokers      |
| Tracheal, bronchus,                 | Zhong 1999     | N/A                                                          | Case-control | Shanghai                   | Female | 35        | 69      | Self-report         | Administrative medical records or                                                    | Morbidity | N/A         | N/A     | N/A    | N/A               | N/A          | 545   | 651      | Community    | Home or work      | Any                                    | Never smokers      |

**Table S3. Summary of study characteristics**

| Health outcome                      | Author-Year | Study name | Study design | Location | Sex  | Age start | Age end | Exposure assessment | Outcome assessment | Endpoint  | Sample size | Exposed | Events | Follow-up (years) | Person-years | Cases | Controls | Control pool | Exposure location | Exposure source | Smoking status                 |
|-------------------------------------|-------------|------------|--------------|----------|------|-----------|---------|---------------------|--------------------|-----------|-------------|---------|--------|-------------------|--------------|-------|----------|--------------|-------------------|-----------------|--------------------------------|
| and lung cancer                     |             |            |              |          |      |           |         |                     | disease registries |           |             |         |        |                   |              |       |          |              |                   |                 |                                |
| Tracheal, bronchus, and lung cancer | Zhuang 2022 | N/A        | Case-control | Fujian   | Both | 18        | 99      | Self-report         | Biomarker          | Morbidity | N/A         | N/A     | N/A    | N/A               | N/A          | 623   | 985      | Community    | Other             | Any             | Non-smokers (former and never) |

N/A, not available

## *Section 2.2: Effect size data details*

From the extracted data points, we identified those that were eligible for inclusion in our models in order to capture the observation(s) from each included study that would best inform our estimates. This process was undertaken because studies often reported several effect sizes estimated from the same populations for the same health outcome but with slightly different parameters or definitions. For example, a study might report the risk associated with being exposed to SHS at different settings and/or from different sources; the risk associated with current exposure and with ever exposure; health risks for both specific age groups and for all ages combined; different disease endpoints (e.g.; mortality or incidence); models with different degrees of adjustment for potential confounders; slightly different outcome definitions; etc. Including all extracted data points in the models would introduce unnecessary noise and over-represent studies that happened to report more observations.

In order to address this challenge, we applied a data point selection process in which each study's extracted data points were evaluated using the stepwise criteria described below to identify the most adjusted effect sizes with the closest match to our exposure case definition, our outcome definition, and largest sample size for each analytic sample. This approach allowed us to select the preferred data points for inclusion without entirely dropping any of the included studies.

### 1. Best match exposure definition:

From each study, we selected the observations that best matched the SHS exposure definition used in the GBD in the following order: First, we selected data points based on the smoking status of the assessed population. Therefore, when available within each study, we selected data points reporting the risk for non-smokers (former and never smokers combined); in the absence of that, we selected data points for former and/or never smokers; finally, if the previous smoking status were not available, we accepted observations with unspecified/any smoking status. Second, we selected observations based on the setting of exposure, where we prioritized those reporting an effect size for home or work exposure combined, followed by home and/or work separately, and finally, those reporting on a broad/unspecified location definition. Third, from the remaining data points, we further selected the ones for inclusion in our models based on the source of exposure, always prioritizing more aggregated definitions (e.g., any or parental) over more specific ones (e.g., maternal or paternal). Finally, if a study reported an effect size for both ever and current SHS exposure, we preferred the observation of the risk associated with current exposure.

### 2. Non-age- or sex-specific observations:

Because we don't compute age or sex-specific pooled effect sizes associated with exposure to SHS in the GBD, we selected the observations reporting the risk for both sexes and all age-groups combined. In case either of both of these were not available, all available sex-specific and/or age-specific observations from a study were retained in this phase.

### 3. Combined sub-groups:

Following, if multiple observations met the above criteria, these observations were frequently from studies that reported effect sizes for other aggregated and disaggregated sub-groups. Examples of these included results from sensitivity analysis results (e.g., separate analyses for pre- and post-menopause women). When possible, we preferred the effect sizes reported for combined sub-

groups over those that were disaggregated so our models could be informed by the largest possible sample sizes.

4. Best match outcome definition:

We selected the observations from each study that best matched the GBD preferred outcome definitions. For stroke, studies that reported effect sizes for both the aggregate outcome and each (or any) of the sub-types, we selected the aggregated outcome definition, since this one was the most common case across the included stroke studies. In the absence of the aggregated definition, we include the effect sizes associated with all reported sub-types.

5. Best match our disease endpoints:

In this next step, we checked the remaining data points for multiple disease endpoints reported within each study. When possible, we selected effect sizes matched to mortality and morbidity combined over those for specific endpoints.

6. Most adjusted effect size reported:

Finally, if multiple observations from the same study met the above criteria, we selected the most adjusted effect size reported.

In the cases where a study still had multiple eligible observations selected after this stepwise process, we manually examined the differences in the observations to determine whether or not multiple rows should still be included in our models. After the selection phase, to avoid overrepresentation of the studies with multiple observations associated with non-mutually exclusive populations, we down-weighted the data points based on the number of overlapping observations within each sex-age-smoking status combination from that study using the following equation:

$$\text{standard error used for modeling} = \sqrt{\text{number of overlapping observations}} \times \text{observed standard error}$$

In Tables S4-S12, we display the effect sizes from each study that were selected for inclusion in our models. For information purposes, we show both the original standard error and the adjusted one (based on the number of overlapping observations, as explained above). The outlier column indicates if the observation was trimmed as part of the Burden of Proof methodology. Before running our models, to best adjust for the smoking status of the studied population, we reassigned all “unknown” smoking status to “adjusted never-smokers” if the study only included kids aged 15 years or less. We also considered those cases “controlled for smoking”, since we assume all of the individuals are never smokers. Those observations were treated as “never-smokers” in our models, but we assign them a separate smoking status category for transparency.

**Table S4. Summary of data inputs ischemic heart disease**

| Author       | Study design       | Health outcome         | Sex    | Age     | Exposure location | Exposure source              | Smoking status                 | Log effect size | Original SE of the log effect size | SE of the log effect size used in the model | Outlier |
|--------------|--------------------|------------------------|--------|---------|-------------------|------------------------------|--------------------------------|-----------------|------------------------------------|---------------------------------------------|---------|
| Attard 2017  | Case-control       | Ischemic heart disease | Both   | 20 - 77 | Home              | Family (anyone in household) | Non-smokers (former and never) | 0.693           | 0.530                              | 0.530                                       | No      |
| Awawdi 2016  | Case-control       | Ischemic heart disease | Female | 35 - 70 | Home              | Spouse                       | Never smokers                  | 1.300           | 0.652                              | 0.652                                       | Yes     |
| Ciruzzi 1998 | Case-control       | Ischemic heart disease | Both   | 24 - 83 | Home              | Family (anyone in household) | Never smokers                  | 0.519           | 0.174                              | 0.174                                       | No      |
| Clark 2013   | Prospective cohort | Ischemic heart disease | Both   | 45 - 74 | Home or work      | Any                          | Never smokers                  | 0.000           | 0.153                              | 0.153                                       | No      |
| Ding 2009    | Case-control       | Ischemic heart disease | Female | 18 - 99 | Home              | Family (anyone in household) | Never smokers                  | 0.419           | 0.207                              | 0.207                                       | No      |
| Diver 2018   | Prospective cohort | Ischemic heart disease | Both   | 50 - 74 | Home              | Family (anyone in household) | Never smokers                  | 0.270           | 0.081                              | 0.081                                       | No      |
| Dobson 1991  | Case-control       | Ischemic heart disease | Male   | 35 - 69 | Home              | Family (anyone in household) | Never smokers                  | -0.030          | 0.335                              | 0.474                                       | No      |
| Dobson 1991  | Case-control       | Ischemic heart disease | Male   | 35 - 69 | Home              | Family (anyone in household) | Former smokers                 | 0.577           | 0.231                              | 0.326                                       | No      |
| Dobson 1991  | Case-control       | Ischemic heart disease | Female | 35 - 69 | Home              | Family (anyone in household) | Never smokers                  | 0.900           | 0.264                              | 0.373                                       | No      |
| Dobson 1991  | Case-control       | Ischemic heart disease | Female | 35 - 69 | Home              | Family (anyone in household) | Former smokers                 | 0.392           | 0.407                              | 0.575                                       | No      |



**Table S4. Summary of data inputs ischemic heart disease**

| Author       | Study design       | Health outcome         | Sex    | Age         | Exposure location | Exposure source              | Smoking status     | Log effect size | Original SE of the log effect size | SE of the log effect size used in the model | Outlier |
|--------------|--------------------|------------------------|--------|-------------|-------------------|------------------------------|--------------------|-----------------|------------------------------------|---------------------------------------------|---------|
| Dobson 1991  | Case-control       | Ischemic heart disease | Male   | 35 - 69     | Work              | Any                          | Never smokers      | -0.051          | 0.319                              | 0.451                                       | No      |
| Dobson 1991  | Case-control       | Ischemic heart disease | Male   | 35 - 69     | Work              | Any                          | Former smokers     | -0.128          | 0.300                              | 0.425                                       | No      |
| Dobson 1991  | Case-control       | Ischemic heart disease | Female | 35 - 69     | Work              | Any                          | Never smokers      | -0.416          | 0.698                              | 0.987                                       | No      |
| Dobson 1991  | Case-control       | Ischemic heart disease | Female | 35 - 69     | Work              | Any                          | Former smokers     | 0.793           | 0.973                              | 1.376                                       | No      |
| Enstrom 2003 | Prospective cohort | Ischemic heart disease | Male   | 30 - 96     | Home              | Spouse                       | Never smokers      | -0.083          | 0.069                              | 0.069                                       | Yes     |
| Enstrom 2003 | Prospective cohort | Ischemic heart disease | Female | 30 - 96     | Home              | Spouse                       | Never smokers      | -0.030          | 0.045                              | 0.045                                       | Yes     |
| Fatmi 2014   | Case-control       | Ischemic heart disease | Female | 0 - 99      | Home              | Any                          | Any smoking status | 0.405           | 0.380                              | 0.380                                       | No      |
| Gallo 2010   | Prospective cohort | Ischemic heart disease | Both   | 18 - 99     | Home              | Family (anyone in household) | Never smokers      | 0.270           | 0.234                              | 0.234                                       | No      |
| Garland 1985 | Prospective cohort | Ischemic heart disease | Female | 50 - 79     | Home              | Spouse                       | Never smokers      | 0.737           | 0.991                              | 0.991                                       | No      |
| He 1994      | Case-control       | Ischemic heart disease | Female | 37 - 67     | Home or work      | Any                          | Never smokers      | 0.859           | 0.435                              | 0.435                                       | No      |
| He 2012      | Prospective cohort | Ischemic heart disease | Both   | 51.5 - 87.8 | Home or work      | Any                          | Never smokers      | 0.765           | 0.390                              | 0.390                                       | No      |
| Hill 2007    | Prospective cohort | Ischemic heart disease | Male   | 45 - 74     | Home              | Family (anyone in household) | Never smokers      | 0.039           | 0.085                              | 0.121                                       | No      |

**Table S4. Summary of data inputs ischemic heart disease**

| Author           | Study design        | Health outcome         | Sex    | Age     | Exposure location | Exposure source              | Smoking status                 | Log effect size | Original SE of the log effect size | SE of the log effect size used in the model | Outlier |
|------------------|---------------------|------------------------|--------|---------|-------------------|------------------------------|--------------------------------|-----------------|------------------------------------|---------------------------------------------|---------|
| Hill 2007        | Prospective cohort  | Ischemic heart disease | Male   | 45 - 74 | Home              | Family (anyone in household) | Never smokers                  | 0.166           | 0.103                              | 0.146                                       | No      |
| Hill 2007        | Prospective cohort  | Ischemic heart disease | Female | 45 - 74 | Home              | Family (anyone in household) | Never smokers                  | -0.020          | 0.088                              | 0.124                                       | No      |
| Hill 2007        | Prospective cohort  | Ischemic heart disease | Female | 45 - 74 | Home              | Family (anyone in household) | Never smokers                  | 0.239           | 0.134                              | 0.190                                       | No      |
| Hole 1989        | Prospective cohort  | Ischemic heart disease | Both   | 45 - 64 | Home              | Family (anyone in household) | Never smokers                  | 0.698           | 0.260                              | 0.260                                       | No      |
| Janghorbani 1997 | Case-control        | Ischemic heart disease | Female | 42 - 85 | Home              | Family (anyone in household) | Never smokers                  | 0.104           | 0.290                              | 0.290                                       | No      |
| Kastorini 2013   | Case-control        | Ischemic heart disease | Both   | 18 - 99 | Other             | Any                          | Non-smokers (former and never) | 1.466           | 0.535                              | 0.535                                       | Yes     |
| Kawachi 1997     | Prospective cohort  | Ischemic heart disease | Female | 30 - 55 | Home or work      | Any                          | Never smokers                  | 0.536           | 0.259                              | 0.259                                       | No      |
| Kobayashi 2022   | Prospective cohort  | Ischemic heart disease | Female | 40 - 59 | Other             | Spouse                       | Never smokers                  | 0.703           | 0.272                              | 0.272                                       | No      |
| La 1993          | Nested case-control | Ischemic heart disease | Both   | 29 - 74 | Home              | Spouse                       | Never smokers                  | 0.191           | 0.379                              | 0.379                                       | No      |
| Lee 1986         | Case-control        | Ischemic heart disease | Both   | 35 - 74 | Home              | Spouse                       | Never smokers                  | -0.010          | 0.212                              | 0.212                                       | No      |

**Table S4. Summary of data inputs ischemic heart disease**

| Author             | Study design       | Health outcome         | Sex    | Age     | Exposure location | Exposure source              | Smoking status                 | Log effect size | Original SE of the log effect size | SE of the log effect size used in the model | Outlier |
|--------------------|--------------------|------------------------|--------|---------|-------------------|------------------------------|--------------------------------|-----------------|------------------------------------|---------------------------------------------|---------|
| Malinauskienė 2011 | Case-control       | Ischemic heart disease | Female | 35 - 61 | Other             | Any                          | Never smokers                  | 0.247           | 0.217                              | 0.217                                       | No      |
| McElduff 1998      | Case-control       | Ischemic heart disease | Both   | 35 - 69 | Home or work      | Any                          | Non-smokers (former and never) | -0.094          | 0.135                              | 0.191                                       | No      |
| McElduff 1998      | Case-control       | Ischemic heart disease | Both   | 35 - 69 | Home or work      | Any                          | Non-smokers (former and never) | 0.122           | 0.145                              | 0.205                                       | No      |
| McElduff 1998      | Case-control       | Ischemic heart disease | Both   | 35 - 64 | Home or work      | Any                          | Non-smokers (former and never) | 0.322           | 0.149                              | 0.149                                       | No      |
| McGhee 2005        | Case-control       | Ischemic heart disease | Both   | 60 - 99 | Home              | Family (anyone in household) | Never smokers                  | 0.300           | 0.137                              | 0.137                                       | No      |
| Muscat 1995        | Case-control       | Ischemic heart disease | Male   | 18 - 74 | Work              | Any                          | Never smokers                  | 0.182           | 0.331                              | 0.331                                       | No      |
| Muscat 1995        | Case-control       | Ischemic heart disease | Female | 18 - 74 | Work              | Any                          | Never smokers                  | 0.000           | 0.467                              | 0.467                                       | No      |
| Nishtar 2004       | Case-control       | Ischemic heart disease | Both   | 39 - 67 | Home              | Family (anyone in household) | Any smoking status             | 1.054           | 0.411                              | 0.411                                       | Yes     |
| Notara 2015        | Prospective cohort | Ischemic heart disease | Both   | 18 - 99 | Work              | Any                          | Unknown                        | -0.041          | 0.110                              | 0.155                                       | No      |
| Notara 2015        | Prospective cohort | Ischemic heart disease | Both   | 18 - 99 | Home              | Family (anyone in household) | Unknown                        | 0.122           | 0.121                              | 0.171                                       | No      |

**Table S4. Summary of data inputs ischemic heart disease**

| Author         | Study design       | Health outcome         | Sex    | Age     | Exposure location | Exposure source              | Smoking status                 | Log effect size | Original SE of the log effect size | SE of the log effect size used in the model | Outlier |
|----------------|--------------------|------------------------|--------|---------|-------------------|------------------------------|--------------------------------|-----------------|------------------------------------|---------------------------------------------|---------|
| Pitsavos 2002  | Case-control       | Ischemic heart disease | Male   | 18 - 99 | Home or work      | Any                          | Never smokers                  | 0.223           | 0.089                              | 0.126                                       | No      |
| Pitsavos 2002  | Case-control       | Ischemic heart disease | Male   | 18 - 99 | Home or work      | Any                          | Never smokers                  | 0.385           | 0.091                              | 0.129                                       | No      |
| Pitsavos 2002  | Case-control       | Ischemic heart disease | Female | 18 - 99 | Home or work      | Any                          | Never smokers                  | 0.255           | 0.111                              | 0.158                                       | No      |
| Pitsavos 2002  | Case-control       | Ischemic heart disease | Female | 18 - 99 | Home or work      | Any                          | Never smokers                  | 0.445           | 0.141                              | 0.199                                       | No      |
| Rashid 2019    | Case-control       | Ischemic heart disease | Female | 30 - 65 | Home or work      | Any                          | Unknown                        | 1.095           | 0.256                              | 0.256                                       | Yes     |
| Rosenlund 2001 | Case-control       | Ischemic heart disease | Both   | 45 - 70 | Home              | Spouse                       | Never smokers                  | 0.315           | 0.215                              | 0.304                                       | No      |
| Rosenlund 2001 | Case-control       | Ischemic heart disease | Both   | 45 - 70 | Work              | Any                          | Never smokers                  | 0.270           | 0.200                              | 0.283                                       | No      |
| Rossi 2011     | Case-control       | Ischemic heart disease | Both   | 18 - 99 | Home              | Family (anyone in household) | Non-smokers (former and never) | 0.157           | 0.080                              | 0.080                                       | No      |
| Sadeghi 2020   | Prospective cohort | Ischemic heart disease | Both   | 30 - 99 | Home or work      | Any                          | Never smokers                  | 0.239           | 0.088                              | 0.088                                       | No      |
| Sandler 1989   | Prospective cohort | Ischemic heart disease | Male   | 25 - 99 | Home              | Family (anyone in household) | Never smokers                  | 0.270           | 0.114                              | 0.114                                       | No      |
| Sandler 1989   | Prospective cohort | Ischemic heart disease | Female | 25 - 99 | Home              | Family (anyone in household) | Never smokers                  | 0.174           | 0.068                              | 0.068                                       | No      |

**Table S4. Summary of data inputs ischemic heart disease**

| Author         | Study design       | Health outcome         | Sex    | Age     | Exposure location | Exposure source              | Smoking status     | Log effect size | Original SE of the log effect size | SE of the log effect size used in the model | Outlier |
|----------------|--------------------|------------------------|--------|---------|-------------------|------------------------------|--------------------|-----------------|------------------------------------|---------------------------------------------|---------|
| Spencer 1999   | Case-control       | Ischemic heart disease | Male   | 25 - 69 | Home              | Family (anyone in household) | Any smoking status | 0.357           | 0.150                              | 0.212                                       | No      |
| Spencer 1999   | Case-control       | Ischemic heart disease | Male   | 25 - 69 | Work              | Any                          | Any smoking status | 0.511           | 0.150                              | 0.212                                       | No      |
| Steenland 1996 | Prospective cohort | Ischemic heart disease | Male   | 30 - 99 | Home              | Spouse                       | Never smokers      | 0.207           | 0.091                              | 0.091                                       | No      |
| Steenland 1996 | Prospective cohort | Ischemic heart disease | Female | 30 - 99 | Home              | Spouse                       | Never smokers      | 0.174           | 0.103                              | 0.103                                       | No      |
| Sulo 2008      | Case-control       | Ischemic heart disease | Both   | 35 - 74 | Home              | Spouse                       | Never smokers      | 0.495           | 0.276                              | 0.276                                       | No      |
| Svendson 1987  | Prospective cohort | Ischemic heart disease | Male   | 35 - 57 | Home              | Spouse                       | Never smokers      | 0.476           | 0.265                              | 0.265                                       | No      |

**Table S5. Summary of data inputs for stroke**

| Author        | Study design       | Health outcome | Sex    | Age         | Exposure location | Exposure source              | Smoking status                 | Log effect size | Original SE of the log effect size | SE of the log effect size used in the model | Outlier |
|---------------|--------------------|----------------|--------|-------------|-------------------|------------------------------|--------------------------------|-----------------|------------------------------------|---------------------------------------------|---------|
| Anderson 2004 | Case-control       | Stroke         | Both   | 15 - 99     | Home              | Family (anyone in household) | Never smokers                  | -0.357          | 0.427                              | 0.427                                       | No      |
| Bonita 1999   | Case-control       | Stroke         | Both   | 35 - 74     | Home or work      | Any                          | Non-smokers (former and never) | 0.599           | 0.158                              | 0.158                                       | Yes     |
| Diver 2018    | Prospective cohort | Stroke         | Both   | 50 - 74     | Home              | Family (anyone in household) | Never smokers                  | 0.215           | 0.120                              | 0.120                                       | No      |
| Gallo 2010    | Prospective cohort | Stroke         | Both   | 18 - 99     | Home              | Family (anyone in household) | Never smokers                  | 0.020           | 0.275                              | 0.388                                       | No      |
| Gallo 2010    | Prospective cohort | Stroke         | Both   | 18 - 99     | Work              | Any                          | Never smokers                  | 0.199           | 0.333                              | 0.471                                       | No      |
| Glymour 2008  | Prospective cohort | Stroke         | Both   | 50 - 99     | Home              | Spouse                       | Never smokers                  | 0.351           | 0.161                              | 0.161                                       | No      |
| Glymour 2008  | Prospective cohort | Stroke         | Both   | 50 - 99     | Home              | Spouse                       | Former smokers                 | 0.542           | 0.137                              | 0.137                                       | Yes     |
| He 2012       | Prospective cohort | Stroke         | Both   | 51.5 - 87.8 | Home or work      | Any                          | Never smokers                  | 0.798           | 0.311                              | 0.311                                       | Yes     |
| Hill 2007     | Prospective cohort | Stroke         | Male   | 45 - 74     | Home              | Family (anyone in household) | Never smokers                  | 0.464           | 0.169                              | 0.239                                       | No      |
| Hill 2007     | Prospective cohort | Stroke         | Female | 45 - 74     | Home              | Family (anyone in household) | Never smokers                  | -0.105          | 0.151                              | 0.213                                       | No      |

**Table S5. Summary of data inputs for stroke**

| Author         | Study design       | Health outcome | Sex    | Age     | Exposure location | Exposure source              | Smoking status                 | Log effect size | Original SE of the log effect size | SE of the log effect size used in the model | Outlier |
|----------------|--------------------|----------------|--------|---------|-------------------|------------------------------|--------------------------------|-----------------|------------------------------------|---------------------------------------------|---------|
| Hill 2007      | Prospective cohort | Stroke         | Male   | 45 - 74 | Home              | Family (anyone in household) | Never smokers                  | 0.599           | 0.213                              | 0.302                                       | No      |
| Hill 2007      | Prospective cohort | Stroke         | Female | 45 - 74 | Home              | Family (anyone in household) | Never smokers                  | 0.157           | 0.223                              | 0.315                                       | No      |
| Hou 2017       | Case-control       | Stroke         | Both   | 30 - 98 | Home              | Spouse                       | Never smokers                  | 0.131           | 0.036                              | 0.036                                       | No      |
| Kastorini 2013 | Case-control       | Stroke         | Both   | 18 - 99 | Other             | Any                          | Non-smokers (former and never) | 0.278           | 0.448                              | 0.448                                       | No      |
| Kobayashi 2022 | Prospective cohort | Stroke         | Female | 40 - 69 | Home              | Spouse                       | Never smokers                  | -0.117          | 0.125                              | 0.125                                       | No      |
| Lee 1986       | Case-control       | Stroke         | Both   | 35 - 74 | Home              | Spouse                       | Never smokers                  | 0.006           | 0.233                              | 0.233                                       | No      |
| Malek 2015     | Prospective cohort | Stroke         | Both   | 45 - 99 | Other             | Any                          | Non-smokers (former and never) | 0.239           | 0.131                              | 0.131                                       | No      |
| McGhee 2005    | Case-control       | Stroke         | Both   | 60 - 99 | Home              | Family (anyone in household) | Never smokers                  | 0.399           | 0.133                              | 0.133                                       | No      |
| Nishino 2014   | Prospective cohort | Stroke         | Female | 40 - 99 | Home              | Family (anyone in household) | Never smokers                  | 0.131           | 0.071                              | 0.071                                       | No      |
| Poulsen 2021   | Case-cohort        | Stroke         | Both   | 50 - 64 | Home or work      | Any                          | Never smokers                  | 0.052           | 0.364                              | 0.364                                       | No      |

**Table S5. Summary of data inputs for stroke**

| Author       | Study design       | Health outcome | Sex    | Age     | Exposure location | Exposure source              | Smoking status | Log effect size | Original SE of the log effect size | SE of the log effect size used in the model | Outlier |
|--------------|--------------------|----------------|--------|---------|-------------------|------------------------------|----------------|-----------------|------------------------------------|---------------------------------------------|---------|
| Qureshi 2005 | Prospective cohort | Stroke         | Female | 25 - 74 | Home              | Spouse                       | Never smokers  | -0.105          | 0.197                              | 0.197                                       | No      |
| Sandler 1989 | Prospective cohort | Stroke         | Male   | 25 - 99 | Home              | Family (anyone in household) | Never smokers  | -0.030          | 0.206                              | 0.206                                       | No      |
| Sandler 1989 | Prospective cohort | Stroke         | Female | 25 - 99 | Home              | Family (anyone in household) | Never smokers  | 0.215           | 0.094                              | 0.094                                       | No      |
| Wen 2006     | Prospective cohort | Stroke         | Female | 40 - 70 | Home              | Spouse                       | Never smokers  | 0.419           | 0.176                              | 0.176                                       | No      |
| Yamada 2003  | Prospective cohort | Stroke         | Both   | 40 - 79 | Other             | Any                          | Unknown        | -0.051          | 0.249                              | 0.249                                       | No      |
| You 1999     | Case-control       | Stroke         | Both   | 18 - 99 | Home              | Spouse                       | Never smokers  | 0.531           | 0.279                              | 0.279                                       | No      |



**Table S6. Summary of data inputs for tracheal, bronchus, and lung cancer**

| Author            | Study design       | Health outcome                      | Sex    | Age     | Exposure location | Exposure source              | Smoking status     | Log effect size | Original SE of the log effect size | SE of the log effect size used in the model | Outlier |
|-------------------|--------------------|-------------------------------------|--------|---------|-------------------|------------------------------|--------------------|-----------------|------------------------------------|---------------------------------------------|---------|
| Abdel-Rahman 2020 | Prospective cohort | Tracheal, bronchus, and lung cancer | Both   | 55 - 74 | Work              | Any                          | Never smokers      | 0.712           | 0.224                              | 0.449                                       | No      |
| Abdel-Rahman 2020 | Prospective cohort | Tracheal, bronchus, and lung cancer | Both   | 55 - 74 | Work              | Any                          | Never smokers      | -0.081          | 0.200                              | 0.400                                       | No      |
| Abdel-Rahman 2020 | Prospective cohort | Tracheal, bronchus, and lung cancer | Both   | 55 - 74 | Home              | Family (anyone in household) | Never smokers      | 0.593           | 0.226                              | 0.453                                       | No      |
| Abdel-Rahman 2020 | Prospective cohort | Tracheal, bronchus, and lung cancer | Both   | 55 - 74 | Home              | Family (anyone in household) | Never smokers      | 0.050           | 0.201                              | 0.401                                       | No      |
| Al-Zoughool 2013  | Case-control       | Tracheal, bronchus, and lung cancer | Both   | 35 - 75 | Home              | Family (anyone in household) | Never smokers      | -0.416          | 0.404                              | 0.404                                       | No      |
| Asomaning 2008    | Case-control       | Tracheal, bronchus, and lung cancer | Both   | 18 - 99 | Home              | Family (anyone in household) | Never smokers      | -0.077          | 0.439                              | 0.621                                       | No      |
| Asomaning 2008    | Case-control       | Tracheal, bronchus, and lung cancer | Both   | 18 - 99 | Work              | Any                          | Never smokers      | -0.122          | 0.435                              | 0.615                                       | No      |
| Behera 2005       | Case-control       | Tracheal, bronchus, and lung cancer | Female | 30 - 80 | Other             | Any                          | Any smoking status | 0.698           | 0.454                              | 0.454                                       | No      |
| Boffetta 1998     | Case-control       | Tracheal, bronchus, and lung cancer | Both   | 18 - 74 | Home and work     | Any                          | Never smokers      | 0.131           | 0.131                              | 0.131                                       | No      |

**Table S6. Summary of data inputs for tracheal, bronchus, and lung cancer**

| Author          | Study design       | Health outcome                      | Sex    | Age     | Exposure location | Exposure source              | Smoking status                 | Log effect size | Original SE of the log effect size | SE of the log effect size used in the model | Outlier |
|-----------------|--------------------|-------------------------------------|--------|---------|-------------------|------------------------------|--------------------------------|-----------------|------------------------------------|---------------------------------------------|---------|
| Boffetta 1999   | Case-control       | Tracheal, bronchus, and lung cancer | Both   | 18 - 99 | Home or work      | Any                          | Never smokers                  | 0.182           | 0.364                              | 0.364                                       | No      |
| Brownson 1992   | Case-control       | Tracheal, bronchus, and lung cancer | Female | 30 - 84 | Home              | Family (anyone in household) | Non-smokers (former and never) | 0.000           | 0.103                              | 0.103                                       | Yes     |
| Bräuner 2012    | Prospective cohort | Tracheal, bronchus, and lung cancer | Both   | 50 - 64 | Home or work      | Any                          | Any smoking status             | 1.769           | 0.146                              | 0.146                                       | Yes     |
| Cardenas 1997   | Prospective cohort | Tracheal, bronchus, and lung cancer | Female | 30 - 99 | Home              | Spouse                       | Never smokers                  | 0.182           | 0.207                              | 0.207                                       | No      |
| Cardenas 1997   | Prospective cohort | Tracheal, bronchus, and lung cancer | Male   | 30 - 99 | Home              | Spouse                       | Never smokers                  | 0.000           | 0.354                              | 0.354                                       | No      |
| Cassidy 2006    | Case-control       | Tracheal, bronchus, and lung cancer | Both   | 18 - 99 | Home              | Family (anyone in household) | Any smoking status             | 0.392           | 0.133                              | 0.188                                       | No      |
| Cassidy 2006    | Case-control       | Tracheal, bronchus, and lung cancer | Both   | 18 - 99 | Work              | Any                          | Any smoking status             | -0.223          | 0.120                              | 0.170                                       | Yes     |
| Chan-Yeung 2003 | Case-control       | Tracheal, bronchus, and lung cancer | Male   | 18 - 99 | Home or work      | Any                          | Never smokers                  | 0.888           | 0.343                              | 0.343                                       | No      |
| Chan-Yeung 2003 | Case-control       | Tracheal, bronchus, and lung cancer | Female | 18 - 99 | Home or work      | Any                          | Never smokers                  | 1.281           | 0.439                              | 0.439                                       | No      |

**Table S6. Summary of data inputs for tracheal, bronchus, and lung cancer**

| Author        | Study design       | Health outcome                      | Sex    | Age     | Exposure location | Exposure source              | Smoking status     | Log effect size | Original SE of the log effect size | SE of the log effect size used in the model | Outlier |
|---------------|--------------------|-------------------------------------|--------|---------|-------------------|------------------------------|--------------------|-----------------|------------------------------------|---------------------------------------------|---------|
| Chen 2008     | Case-control       | Tracheal, bronchus, and lung cancer | Both   | 18 - 99 | Home or work      | Any                          | Any smoking status | 0.264           | 0.217                              | 0.217                                       | No      |
| Cheng 2022    | Prospective cohort | Tracheal, bronchus, and lung cancer | Both   | 30 - 79 | Home              | Family (anyone in household) | Never smokers      | -0.041          | 0.087                              | 0.087                                       | Yes     |
| Consonni 2018 | Case-control       | Tracheal, bronchus, and lung cancer | Male   | 35 - 79 | Home or work      | Any                          | Any smoking status | 0.519           | 0.151                              | 0.151                                       | No      |
| Consonni 2018 | Case-control       | Tracheal, bronchus, and lung cancer | Female | 35 - 79 | Home or work      | Any                          | Any smoking status | 0.255           | 0.310                              | 0.310                                       | No      |
| Dalager 1986  | Case-control       | Tracheal, bronchus, and lung cancer | Both   | 18 - 99 | Home              | Spouse                       | Never smokers      | 0.020           | 0.576                              | 0.998                                       | No      |
| Dalager 1986  | Case-control       | Tracheal, bronchus, and lung cancer | Both   | 18 - 99 | Home              | Spouse                       | Never smokers      | 1.058           | 0.587                              | 1.017                                       | No      |
| Dalager 1986  | Case-control       | Tracheal, bronchus, and lung cancer | Both   | 18 - 99 | Home              | Spouse                       | Never smokers      | 0.270           | 0.512                              | 0.887                                       | No      |
| Davis 2018    | Case-control       | Tracheal, bronchus, and lung cancer | Female | 20 - 75 | Home or work      | Any                          | Never smokers      | -0.041          | 0.288                              | 0.288                                       | No      |
| Du 1995       | Case-control       | Tracheal, bronchus, and lung cancer | Female | 18 - 99 | Home              | Spouse                       | Never smokers      | 0.174           | 0.302                              | 0.302                                       | No      |

**Table S6. Summary of data inputs for tracheal, bronchus, and lung cancer**

| Author                | Study design       | Health outcome                      | Sex    | Age      | Exposure location | Exposure source              | Smoking status     | Log effect size | Original SE of the log effect size | SE of the log effect size used in the model | Outlier |
|-----------------------|--------------------|-------------------------------------|--------|----------|-------------------|------------------------------|--------------------|-----------------|------------------------------------|---------------------------------------------|---------|
| Enstrom 2003          | Prospective cohort | Tracheal, bronchus, and lung cancer | Male   | 35 - 84  | Home              | Spouse                       | Never smokers      | -0.562          | 0.403                              | 0.403                                       | No      |
| Enstrom 2003          | Prospective cohort | Tracheal, bronchus, and lung cancer | Female | 35 - 84  | Home              | Spouse                       | Never smokers      | -0.128          | 0.193                              | 0.193                                       | No      |
| Ferreccio 2013        | Case-control       | Tracheal, bronchus, and lung cancer | Both   | 30 - 99  | Home              | Family (anyone in household) | Never smokers      | 0.358           | 0.310                              | 0.310                                       | No      |
| Fontham 1994          | Case-control       | Tracheal, bronchus, and lung cancer | Female | 20 - 79  | Home              | Family (anyone in household) | Never smokers      | 0.207           | 0.125                              | 0.177                                       | No      |
| Fontham 1994          | Case-control       | Tracheal, bronchus, and lung cancer | Female | 20 - 79  | Work              | Any                          | Never smokers      | 0.329           | 0.115                              | 0.162                                       | No      |
| Franco-Marina 2006    | Case-control       | Tracheal, bronchus, and lung cancer | Both   | 47 - 102 | Home              | Family (anyone in household) | Any smoking status | 0.588           | 0.187                              | 0.187                                       | No      |
| Galeone 2008          | Case-control       | Tracheal, bronchus, and lung cancer | Both   | 18 - 99  | Home and work     | Any                          | Never smokers      | 0.604           | 0.347                              | 0.347                                       | No      |
| Gallegos-Arreola 2008 | Case-control       | Tracheal, bronchus, and lung cancer | Both   | 18 - 88  | Other             | Any                          | Never smokers      | 2.079           | 0.752                              | 0.752                                       | Yes     |
| Gao 1987              | Case-control       | Tracheal, bronchus, and lung cancer | Female | 35 - 69  | Home              | Family (anyone in household) | Any smoking status | -0.105          | 0.216                              | 0.216                                       | No      |

**Table S6. Summary of data inputs for tracheal, bronchus, and lung cancer**

| Author         | Study design | Health outcome                      | Sex    | Age     | Exposure location | Exposure source              | Smoking status     | Log effect size | Original SE of the log effect size | SE of the log effect size used in the model | Outlier |
|----------------|--------------|-------------------------------------|--------|---------|-------------------|------------------------------|--------------------|-----------------|------------------------------------|---------------------------------------------|---------|
| Garfinkel 1985 | Case-control | Tracheal, bronchus, and lung cancer | Female | 40 - 99 | Home              | Spouse                       | Never smokers      | 0.207           | 0.136                              | 0.136                                       | No      |
| Ger 1993       | Case-control | Tracheal, bronchus, and lung cancer | Both   | 18 - 99 | Home              | Spouse                       | Any smoking status | -0.261          | 0.400                              | 0.980                                       | No      |
| Ger 1993       | Case-control | Tracheal, bronchus, and lung cancer | Both   | 18 - 99 | Home              | Other family (not spouse)    | Any smoking status | -0.416          | 0.336                              | 0.823                                       | No      |
| Ger 1993       | Case-control | Tracheal, bronchus, and lung cancer | Both   | 18 - 99 | Work              | Any                          | Any smoking status | 0.293           | 0.319                              | 0.780                                       | No      |
| Ger 1993       | Case-control | Tracheal, bronchus, and lung cancer | Both   | 18 - 99 | Home              | Spouse                       | Any smoking status | 1.044           | 0.513                              | 1.257                                       | No      |
| Ger 1993       | Case-control | Tracheal, bronchus, and lung cancer | Both   | 18 - 99 | Home              | Other family (not spouse)    | Any smoking status | -0.041          | 0.352                              | 0.863                                       | No      |
| Ger 1993       | Case-control | Tracheal, bronchus, and lung cancer | Both   | 18 - 99 | Work              | Any                          | Any smoking status | 0.554           | 0.386                              | 0.945                                       | No      |
| Gorlova 2008   | Case-control | Tracheal, bronchus, and lung cancer | Both   | 18 - 99 | Home or work      | Any                          | Never smokers      | 0.610           | 0.193                              | 0.193                                       | No      |
| Han 2017       | Case-control | Tracheal, bronchus, and lung cancer | Both   | 19 - 99 | Home              | Family (anyone in household) | Never smokers      | 0.507           | 0.307                              | 0.614                                       | No      |

**Table S6. Summary of data inputs for tracheal, bronchus, and lung cancer**

| Author                 | Study design       | Health outcome                      | Sex    | Age         | Exposure location | Exposure source              | Smoking status     | Log effect size | Original SE of the log effect size | SE of the log effect size used in the model | Outlier |
|------------------------|--------------------|-------------------------------------|--------|-------------|-------------------|------------------------------|--------------------|-----------------|------------------------------------|---------------------------------------------|---------|
| Han 2017               | Case-control       | Tracheal, bronchus, and lung cancer | Both   | 19 - 99     | Work              | Any                          | Never smokers      | 1.562           | 0.382                              | 0.764                                       | No      |
| Han 2017               | Case-control       | Tracheal, bronchus, and lung cancer | Both   | 19 - 99     | Home              | Family (anyone in household) | Never smokers      | 0.438           | 0.350                              | 0.699                                       | No      |
| Han 2017               | Case-control       | Tracheal, bronchus, and lung cancer | Both   | 19 - 99     | Work              | Any                          | Never smokers      | 0.536           | 0.357                              | 0.713                                       | No      |
| Hansen 2021            | Prospective cohort | Tracheal, bronchus, and lung cancer | Female | 31 - 70     | Home              | Family (anyone in household) | Never smokers      | 0.293           | 0.208                              | 0.208                                       | No      |
| He 2012                | Prospective cohort | Tracheal, bronchus, and lung cancer | Both   | 51.5 - 87.8 | Home or work      | Any                          | Never smokers      | 0.693           | 0.595                              | 0.595                                       | No      |
| He 2013                | Case-control       | Tracheal, bronchus, and lung cancer | Both   | 18 - 99     | Home or work      | Any                          | Any smoking status | 1.795           | 0.132                              | 0.132                                       | Yes     |
| He 2017                | Case-control       | Tracheal, bronchus, and lung cancer | Female | 40 - 99     | Home or work      | Any                          | Any smoking status | 0.770           | 0.132                              | 0.132                                       | Yes     |
| Hernández-Garduño 2004 | Case-control       | Tracheal, bronchus, and lung cancer | Female | 44 - 93     | Home              | Family (anyone in household) | Never smokers      | 0.405           | 0.261                              | 0.261                                       | No      |
| Hill 2007              | Prospective cohort | Tracheal, bronchus, and lung cancer | Male   | 45 - 74     | Home              | Family (anyone in household) | Never smokers      | 0.077           | 0.336                              | 0.336                                       | No      |

**Table S6. Summary of data inputs for tracheal, bronchus, and lung cancer**

| Author        | Study design       | Health outcome                      | Sex    | Age     | Exposure location | Exposure source              | Smoking status     | Log effect size | Original SE of the log effect size | SE of the log effect size used in the model | Outlier |
|---------------|--------------------|-------------------------------------|--------|---------|-------------------|------------------------------|--------------------|-----------------|------------------------------------|---------------------------------------------|---------|
| Hill 2007     | Prospective cohort | Tracheal, bronchus, and lung cancer | Female | 45 - 74 | Home              | Family (anyone in household) | Never smokers      | 0.322           | 0.288                              | 0.288                                       | No      |
| Hirayama 1984 | Prospective cohort | Tracheal, bronchus, and lung cancer | Female | 40 - 99 | Home              | Spouse                       | Never smokers      | 0.372           | 0.202                              | 0.202                                       | No      |
| Hirayama 1984 | Prospective cohort | Tracheal, bronchus, and lung cancer | Male   | 40 - 99 | Home              | Spouse                       | Never smokers      | 0.811           | 0.385                              | 0.385                                       | No      |
| Hole 1989     | Prospective cohort | Tracheal, bronchus, and lung cancer | Both   | 45 - 64 | Home              | Family (anyone in household) | Never smokers      | 0.880           | 0.855                              | 0.855                                       | No      |
| Humble 1987   | Case-control       | Tracheal, bronchus, and lung cancer | Both   | 18 - 84 | Home              | Spouse                       | Never smokers      | 1.065           | 0.498                              | 0.498                                       | No      |
| Janerich 1990 | Case-control       | Tracheal, bronchus, and lung cancer | Both   | 20 - 80 | Home              | Spouse                       | Never smokers      | -0.073          | 0.268                              | 0.268                                       | No      |
| Jee 1999      | Prospective cohort | Tracheal, bronchus, and lung cancer | Female | 40 - 88 | Home              | Spouse                       | Never smokers      | 0.642           | 0.320                              | 0.320                                       | No      |
| Jin 2014      | Case-control       | Tracheal, bronchus, and lung cancer | Both   | 18 - 99 | Home              | Family (anyone in household) | Any smoking status | 0.344           | 0.065                              | 0.065                                       | No      |
| Johnson 2001  | Case-control       | Tracheal, bronchus, and lung cancer | Female | 20 - 75 | Home and work     | Any                          | Never smokers      | 0.182           | 0.457                              | 0.646                                       | No      |

**Table S6. Summary of data inputs for tracheal, bronchus, and lung cancer**

| Author         | Study design | Health outcome                      | Sex    | Age     | Exposure location | Exposure source              | Smoking status                 | Log effect size | Original SE of the log effect size | SE of the log effect size used in the model | Outlier |
|----------------|--------------|-------------------------------------|--------|---------|-------------------|------------------------------|--------------------------------|-----------------|------------------------------------|---------------------------------------------|---------|
| Johnson 2001   | Case-control | Tracheal, bronchus, and lung cancer | Female | 20 - 75 | Home and work     | Any                          | Never smokers                  | 0.489           | 0.377                              | 0.532                                       | No      |
| Jöckel 1998    | Case-control | Tracheal, bronchus, and lung cancer | Both   | 31 - 42 | Home              | Spouse                       | Non-smokers (former and never) | 0.457           | 0.326                              | 0.326                                       | No      |
| Kabat 1984     | Case-control | Tracheal, bronchus, and lung cancer | Both   | 18 - 99 | Home              | Family (anyone in household) | Never smokers                  | 0.000           | 0.356                              | 0.503                                       | No      |
| Kabat 1984     | Case-control | Tracheal, bronchus, and lung cancer | Both   | 18 - 99 | Work              | Any                          | Never smokers                  | 0.104           | 0.322                              | 0.455                                       | No      |
| Kabat 1995     | Case-control | Tracheal, bronchus, and lung cancer | Male   | 20 - 80 | Home              | Spouse                       | Never smokers                  | 0.470           | 0.444                              | 0.444                                       | No      |
| Kabat 1995     | Case-control | Tracheal, bronchus, and lung cancer | Female | 20 - 80 | Home              | Spouse                       | Never smokers                  | 0.077           | 0.299                              | 0.299                                       | No      |
| Kabat 1996     | Case-control | Tracheal, bronchus, and lung cancer | Male   | 20 - 80 | Home              | Spouse                       | Never smokers                  | 0.470           | 0.432                              | 0.432                                       | No      |
| Kabat 1996     | Case-control | Tracheal, bronchus, and lung cancer | Female | 20 - 80 | Home              | Spouse                       | Never smokers                  | 0.095           | 0.294                              | 0.294                                       | No      |
| Kalandidi 1990 | Case-control | Tracheal, bronchus, and lung cancer | Female | 35 - 99 | Home              | Spouse                       | Never smokers                  | 0.747           | 0.337                              | 0.337                                       | No      |



**Table S6. Summary of data inputs for tracheal, bronchus, and lung cancer**

| Author         | Study design       | Health outcome                      | Sex    | Age     | Exposure location | Exposure source              | Smoking status     | Log effect size | Original SE of the log effect size | SE of the log effect size used in the model | Outlier |
|----------------|--------------------|-------------------------------------|--------|---------|-------------------|------------------------------|--------------------|-----------------|------------------------------------|---------------------------------------------|---------|
| Koo 1987       | Case-control       | Tracheal, bronchus, and lung cancer | Female | 18 - 99 | Home              | Family (anyone in household) | Never smokers      | 0.519           | 0.555                              | 0.784                                       | No      |
| Koo 1987       | Case-control       | Tracheal, bronchus, and lung cancer | Female | 18 - 99 | Home              | Family (anyone in household) | Never smokers      | -0.446          | 0.594                              | 0.840                                       | No      |
| Kurahashi 2008 | Prospective cohort | Tracheal, bronchus, and lung cancer | Female | 40 - 69 | Home              | Spouse                       | Never smokers      | 0.293           | 0.256                              | 0.362                                       | No      |
| Kurahashi 2008 | Prospective cohort | Tracheal, bronchus, and lung cancer | Female | 40 - 69 | Work              | Any                          | Never smokers      | 1.008           | 0.461                              | 0.652                                       | No      |
| Lam 1987       | Case-control       | Tracheal, bronchus, and lung cancer | Female | 18 - 99 | Home              | Spouse                       | Never smokers      | 0.501           | 0.180                              | 0.180                                       | No      |
| Lan 2008       | Case-control       | Tracheal, bronchus, and lung cancer | Both   | 18 - 85 | Home              | Family (anyone in household) | Any smoking status | 0.474           | 0.247                              | 0.247                                       | No      |
| Lee 1986       | Case-control       | Tracheal, bronchus, and lung cancer | Both   | 35 - 74 | Home              | Spouse                       | Never smokers      | 0.104           | 0.394                              | 0.394                                       | No      |
| Lee 2000       | Case-control       | Tracheal, bronchus, and lung cancer | Female | 18 - 99 | Home              | Spouse                       | Never smokers      | 0.788           | 0.201                              | 0.402                                       | No      |
| Lee 2000       | Case-control       | Tracheal, bronchus, and lung cancer | Female | 18 - 99 | Home              | Other family (not spouse)    | Never smokers      | 0.182           | 0.292                              | 0.584                                       | No      |

**Table S6. Summary of data inputs for tracheal, bronchus, and lung cancer**

| Author     | Study design       | Health outcome                      | Sex    | Age     | Exposure location | Exposure source              | Smoking status     | Log effect size | Original SE of the log effect size | SE of the log effect size used in the model | Outlier |
|------------|--------------------|-------------------------------------|--------|---------|-------------------|------------------------------|--------------------|-----------------|------------------------------------|---------------------------------------------|---------|
| Lee 2000   | Case-control       | Tracheal, bronchus, and lung cancer | Female | 18 - 99 | Home              | Other family (not spouse)    | Never smokers      | 0.405           | 0.239                              | 0.479                                       | No      |
| Lee 2000   | Case-control       | Tracheal, bronchus, and lung cancer | Female | 18 - 99 | Work              | Any                          | Never smokers      | 0.182           | 0.400                              | 0.800                                       | No      |
| Li 2002    | Case-cohort        | Tracheal, bronchus, and lung cancer | Both   | 24 - 78 | Work              | Any                          | Never smokers      | 1.044           | 0.800                              | 0.800                                       | No      |
| Li 2020    | Prospective cohort | Tracheal, bronchus, and lung cancer | Both   | 23 - 79 | Home or work      | Any                          | Never smokers      | 0.239           | 0.170                              | 0.170                                       | No      |
| Liang 2009 | Case-control       | Tracheal, bronchus, and lung cancer | Female | 20 - 80 | Other             | Any                          | Never smokers      | 0.049           | 0.215                              | 0.303                                       | No      |
| Liang 2009 | Case-control       | Tracheal, bronchus, and lung cancer | Female | 20 - 80 | Other             | Any                          | Never smokers      | 0.358           | 0.186                              | 0.262                                       | No      |
| Liang 2019 | Case-control       | Tracheal, bronchus, and lung cancer | Both   | 15 - 99 | Work              | Any                          | Never smokers      | 0.658           | 0.117                              | 0.165                                       | No      |
| Liang 2019 | Case-control       | Tracheal, bronchus, and lung cancer | Both   | 15 - 99 | Home              | Family (anyone in household) | Never smokers      | 0.658           | 0.091                              | 0.128                                       | No      |
| Liu 1991   | Case-control       | Tracheal, bronchus, and lung cancer | Female | 18 - 99 | Home              | Family (anyone in household) | Any smoking status | -0.261          | 0.479                              | 0.479                                       | No      |

**Table S6. Summary of data inputs for tracheal, bronchus, and lung cancer**

| Author          | Study design       | Health outcome                      | Sex    | Age     | Exposure location | Exposure source              | Smoking status     | Log effect size | Original SE of the log effect size | SE of the log effect size used in the model | Outlier |
|-----------------|--------------------|-------------------------------------|--------|---------|-------------------|------------------------------|--------------------|-----------------|------------------------------------|---------------------------------------------|---------|
| Masjedi 2013    | Case-control       | Tracheal, bronchus, and lung cancer | Male   | 18 - 99 | Other             | Any                          | Unknown            | 0.531           | 0.463                              | 0.463                                       | No      |
| Masjedi 2013    | Case-control       | Tracheal, bronchus, and lung cancer | Female | 18 - 99 | Other             | Any                          | Unknown            | 0.336           | 0.363                              | 0.363                                       | No      |
| Mbeje 2022      | Case-control       | Tracheal, bronchus, and lung cancer | Both   | 21 - 99 | Home or work      | Any                          | Any smoking status | 1.188           | 0.407                              | 0.407                                       | No      |
| McGhee 2005     | Case-control       | Tracheal, bronchus, and lung cancer | Both   | 60 - 99 | Home              | Family (anyone in household) | Never smokers      | 0.329           | 0.153                              | 0.153                                       | No      |
| Miller 2003     | Case-control       | Tracheal, bronchus, and lung cancer | Both   | 27 - 96 | Other             | Any                          | Never smokers      | 0.322           | 0.290                              | 0.290                                       | No      |
| Minichilli 2022 | Case-control       | Tracheal, bronchus, and lung cancer | Both   | 18 - 99 | Other             | Any                          | Any smoking status | 0.304           | 0.112                              | 0.112                                       | No      |
| Ng 2005         | Case-control       | Tracheal, bronchus, and lung cancer | Female | 18 - 99 | Home              | Family (anyone in household) | Never smokers      | -0.288          | 0.251                              | 0.355                                       | No      |
| Ng 2005         | Case-control       | Tracheal, bronchus, and lung cancer | Female | 18 - 99 | Home              | Family (anyone in household) | Never smokers      | 0.223           | 0.400                              | 0.565                                       | No      |
| Nishino 2001    | Prospective cohort | Tracheal, bronchus, and lung cancer | Female | 40 - 99 | Home              | Family (anyone in household) | Never smokers      | 0.182           | 0.607                              | 0.607                                       | No      |

**Table S6. Summary of data inputs for tracheal, bronchus, and lung cancer**

| Author        | Study design       | Health outcome                      | Sex    | Age     | Exposure location | Exposure source              | Smoking status                 | Log effect size | Original SE of the log effect size | SE of the log effect size used in the model | Outlier |
|---------------|--------------------|-------------------------------------|--------|---------|-------------------|------------------------------|--------------------------------|-----------------|------------------------------------|---------------------------------------------|---------|
| Phukan 2014   | Case-control       | Tracheal, bronchus, and lung cancer | Female | 18 - 99 | Home              | Family (anyone in household) | Any smoking status             | 0.445           | 0.217                              | 0.217                                       | No      |
| Pirie 2016    | Prospective cohort | Tracheal, bronchus, and lung cancer | Female | 50 - 84 | Home              | Family (anyone in household) | Never smokers                  | -0.041          | 0.167                              | 0.167                                       | No      |
| Rapiti 1999   | Case-control       | Tracheal, bronchus, and lung cancer | Both   | 18 - 99 | Home              | Spouse                       | Never smokers                  | 1.629           | 0.619                              | 0.619                                       | Yes     |
| Raspanti 2016 | Case-control       | Tracheal, bronchus, and lung cancer | Both   | 18 - 99 | Home or work      | Any                          | Any smoking status             | 0.255           | 0.140                              | 0.140                                       | No      |
| Ren 2013      | Case-control       | Tracheal, bronchus, and lung cancer | Female | 18 - 99 | Other             | Any                          | Never smokers                  | 0.122           | 0.105                              | 0.105                                       | No      |
| Robles 2014   | Case-control       | Tracheal, bronchus, and lung cancer | Both   | 18 - 99 | Other             | Any                          | Never smokers                  | 0.810           | 0.164                              | 0.164                                       | Yes     |
| Rylander 2006 | Case-control       | Tracheal, bronchus, and lung cancer | Both   | 18 - 75 | Work              | Any                          | Non-smokers (former and never) | 0.815           | 0.452                              | 0.452                                       | No      |
| Sasco 2002    | Case-control       | Tracheal, bronchus, and lung cancer | Both   | 34 - 82 | Home or work      | Any                          | Any smoking status             | 0.307           | 0.333                              | 0.333                                       | No      |
| Schwartz 2007 | Case-control       | Tracheal, bronchus, and lung cancer | Female | 18 - 74 | Home              | Family (anyone in household) | Any smoking status             | 0.772           | 0.148                              | 0.210                                       | No      |

**Table S6. Summary of data inputs for tracheal, bronchus, and lung cancer**

| Author        | Study design       | Health outcome                      | Sex    | Age     | Exposure location | Exposure source              | Smoking status     | Log effect size | Original SE of the log effect size | SE of the log effect size used in the model | Outlier |
|---------------|--------------------|-------------------------------------|--------|---------|-------------------|------------------------------|--------------------|-----------------|------------------------------------|---------------------------------------------|---------|
| Schwartz 2007 | Case-control       | Tracheal, bronchus, and lung cancer | Female | 18 - 74 | Work              | Any                          | Any smoking status | 0.674           | 0.146                              | 0.206                                       | No      |
| Seki 2013     | Case-control       | Tracheal, bronchus, and lung cancer | Male   | 30 - 99 | Home              | Spouse                       | Never smokers      | 0.255           | 0.681                              | 0.681                                       | No      |
| Seki 2013     | Case-control       | Tracheal, bronchus, and lung cancer | Female | 30 - 99 | Home              | Spouse                       | Never smokers      | 0.270           | 0.141                              | 0.141                                       | No      |
| Shen 1998     | Case-control       | Tracheal, bronchus, and lung cancer | Female | 18 - 99 | Home              | Family (anyone in household) | Never smokers      | 0.322           | 0.466                              | 0.466                                       | No      |
| Sloan 2012    | Case-control       | Tracheal, bronchus, and lung cancer | Both   | 30 - 74 | Home              | Family (anyone in household) | Any smoking status | 0.723           | 0.220                              | 0.311                                       | No      |
| Sloan 2012    | Case-control       | Tracheal, bronchus, and lung cancer | Both   | 30 - 74 | Home              | Family (anyone in household) | Any smoking status | 0.658           | 0.192                              | 0.271                                       | No      |
| Sobue 1990    | Case-control       | Tracheal, bronchus, and lung cancer | Female | 40 - 79 | Home              | Other family (not spouse)    | Never smokers      | 0.405           | 0.201                              | 0.201                                       | No      |
| Speizer 1999  | Prospective cohort | Tracheal, bronchus, and lung cancer | Female | 30 - 55 | Other             | Any                          | Never smokers      | 0.405           | 0.777                              | 0.777                                       | No      |
| Spitz 2011    | Case-control       | Tracheal, bronchus, and lung cancer | Both   | 18 - 99 | Other             | Any                          | Never smokers      | 0.464           | 0.179                              | 0.179                                       | No      |

**Table S6. Summary of data inputs for tracheal, bronchus, and lung cancer**

| Author            | Study design       | Health outcome                      | Sex    | Age     | Exposure location | Exposure source              | Smoking status     | Log effect size | Original SE of the log effect size | SE of the log effect size used in the model | Outlier |
|-------------------|--------------------|-------------------------------------|--------|---------|-------------------|------------------------------|--------------------|-----------------|------------------------------------|---------------------------------------------|---------|
| Stockwell 1992    | Case-control       | Tracheal, bronchus, and lung cancer | Female | 18 - 99 | Home              | Spouse                       | Never smokers      | 0.470           | 0.337                              | 0.337                                       | No      |
| Sun 2017          | Prospective cohort | Tracheal, bronchus, and lung cancer | Both   | 20 - 99 | Home              | Family (anyone in household) | Any smoking status | 0.405           | 0.166                              | 0.235                                       | No      |
| Sun 2017          | Prospective cohort | Tracheal, bronchus, and lung cancer | Both   | 20 - 99 | Home              | Family (anyone in household) | Any smoking status | 0.412           | 0.163                              | 0.230                                       | No      |
| Svensson 1989     | Case-control       | Tracheal, bronchus, and lung cancer | Female | 18 - 99 | Home or work      | Any                          | Never smokers      | 0.182           | 0.505                              | 0.505                                       | No      |
| Torres-Durán 2015 | Case-control       | Tracheal, bronchus, and lung cancer | Both   | 34 - 90 | Home              | Family (anyone in household) | Never smokers      | -0.248          | 0.209                              | 0.209                                       | Yes     |
| Tubío-Pérez 2022  | Case-control       | Tracheal, bronchus, and lung cancer | Both   | 36 - 99 | Home              | Family (anyone in household) | Never smokers      | -0.128          | 0.146                              | 0.146                                       | Yes     |
| Veglia 2007       | Prospective cohort | Tracheal, bronchus, and lung cancer | Both   | 35 - 74 | Work              | Any                          | Unknown            | 0.464           | 0.143                              | 0.143                                       | No      |
| Villeneuve 2014   | Case-control       | Tracheal, bronchus, and lung cancer | Both   | 20 - 84 | Home              | Family (anyone in household) | Any smoking status | 0.113           | 0.271                              | 0.470                                       | No      |
| Villeneuve 2014   | Case-control       | Tracheal, bronchus, and lung cancer | Both   | 20 - 84 | Work              | Any                          | Any smoking status | 0.577           | 0.361                              | 0.625                                       | No      |

**Table S6. Summary of data inputs for tracheal, bronchus, and lung cancer**

| Author          | Study design       | Health outcome                      | Sex    | Age     | Exposure location | Exposure source              | Smoking status                 | Log effect size | Original SE of the log effect size | SE of the log effect size used in the model | Outlier |
|-----------------|--------------------|-------------------------------------|--------|---------|-------------------|------------------------------|--------------------------------|-----------------|------------------------------------|---------------------------------------------|---------|
| Villeneuve 2014 | Case-control       | Tracheal, bronchus, and lung cancer | Both   | 20 - 84 | Home and work     | Any                          | Any smoking status             | 0.525           | 0.267                              | 0.463                                       | No      |
| Wang 1994       | Case-control       | Tracheal, bronchus, and lung cancer | Female | 30 - 69 | Home              | Family (anyone in household) | Non-smokers (former and never) | -0.094          | 0.527                              | 0.527                                       | No      |
| Wang 1996       | Case-control       | Tracheal, bronchus, and lung cancer | Both   | 32 - 78 | Home              | Family (anyone in household) | Any smoking status             | 0.582           | 0.258                              | 0.365                                       | No      |
| Wang 1996       | Case-control       | Tracheal, bronchus, and lung cancer | Both   | 32 - 78 | Work              | Any                          | Any smoking status             | 0.519           | 0.201                              | 0.284                                       | No      |
| Wang 1996       | Case-control       | Tracheal, bronchus, and lung cancer | Female | 35 - 69 | Work              | Any                          | Never smokers                  | -0.117          | 0.349                              | 0.349                                       | No      |
| Wang 2009       | Case-control       | Tracheal, bronchus, and lung cancer | Female | 30 - 79 | Home or work      | Any                          | Never smokers                  | -0.010          | 0.307                              | 0.434                                       | No      |
| Wang 2009       | Case-control       | Tracheal, bronchus, and lung cancer | Female | 30 - 79 | Home and work     | Any                          | Never smokers                  | 0.049           | 0.338                              | 0.478                                       | No      |
| Wang 2015       | Prospective cohort | Tracheal, bronchus, and lung cancer | Female | 50 - 79 | Home              | Family (anyone in household) | Never smokers                  | 0.191           | 0.180                              | 0.254                                       | No      |
| Wang 2015       | Prospective cohort | Tracheal, bronchus, and lung cancer | Female | 50 - 79 | Work              | Any                          | Never smokers                  | 0.039           | 0.179                              | 0.253                                       | No      |

**Table S6. Summary of data inputs for tracheal, bronchus, and lung cancer**

| Author        | Study design       | Health outcome                      | Sex    | Age     | Exposure location | Exposure source              | Smoking status                 | Log effect size | Original SE of the log effect size | SE of the log effect size used in the model | Outlier |
|---------------|--------------------|-------------------------------------|--------|---------|-------------------|------------------------------|--------------------------------|-----------------|------------------------------------|---------------------------------------------|---------|
| Weiss 2008    | Prospective cohort | Tracheal, bronchus, and lung cancer | Female | 40 - 70 | Home or work      | Family (anyone in household) | Non-smokers (former and never) | -0.062          | 0.186                              | 0.186                                       | No      |
| Wen 2006      | Prospective cohort | Tracheal, bronchus, and lung cancer | Female | 40 - 70 | Home              | Spouse                       | Never smokers                  | 0.058           | 0.219                              | 0.219                                       | No      |
| Wenzlaff 2005 | Case-control       | Tracheal, bronchus, and lung cancer | Both   | 18 - 99 | Home              | Family (anyone in household) | Never smokers                  | -0.110          | 0.238                              | 0.238                                       | No      |
| Wu 1985       | Case-control       | Tracheal, bronchus, and lung cancer | Female | 18 - 75 | Home              | Spouse                       | Any smoking status             | 0.182           | 0.364                              | 0.728                                       | No      |
| Wu 1985       | Case-control       | Tracheal, bronchus, and lung cancer | Female | 18 - 75 | Home              | Spouse                       | Any smoking status             | 0.000           | 1.105                              | 2.210                                       | No      |
| Wu 1985       | Case-control       | Tracheal, bronchus, and lung cancer | Female | 18 - 75 | Work              | Any                          | Any smoking status             | 0.182           | 0.258                              | 0.516                                       | No      |
| Wu 1985       | Case-control       | Tracheal, bronchus, and lung cancer | Female | 18 - 75 | Work              | Any                          | Any smoking status             | 0.833           | 0.618                              | 1.236                                       | No      |
| Xu 2020       | Case-control       | Tracheal, bronchus, and lung cancer | Both   | 18 - 99 | Other             | Any                          | Any smoking status             | 0.942           | 0.136                              | 0.136                                       | Yes     |
| Yang 2015     | Case-control       | Tracheal, bronchus, and lung cancer | Both   | 18 - 99 | Home              | Family (anyone in household) | Never smokers                  | 0.300           | 0.136                              | 0.192                                       | No      |



**Table S6. Summary of data inputs for tracheal, bronchus, and lung cancer**

| Author       | Study design | Health outcome                      | Sex    | Age     | Exposure location | Exposure source              | Smoking status     | Log effect size | Original SE of the log effect size | SE of the log effect size used in the model | Outlier |
|--------------|--------------|-------------------------------------|--------|---------|-------------------|------------------------------|--------------------|-----------------|------------------------------------|---------------------------------------------|---------|
| Yang 2015    | Case-control | Tracheal, bronchus, and lung cancer | Both   | 18 - 99 | Home              | Family (anyone in household) | Never smokers      | 0.344           | 0.163                              | 0.230                                       | No      |
| Yang 2016    | Case-control | Tracheal, bronchus, and lung cancer | Male   | 18 - 99 | Other             | Any                          | Any smoking status | 0.986           | 0.206                              | 0.206                                       | Yes     |
| Yang 2016    | Case-control | Tracheal, bronchus, and lung cancer | Female | 18 - 99 | Other             | Any                          | Any smoking status | 0.756           | 0.167                              | 0.167                                       | No      |
| Yin 2014     | Case-control | Tracheal, bronchus, and lung cancer | Female | 18 - 99 | Other             | Any                          | Never smokers      | 0.247           | 0.163                              | 0.163                                       | No      |
| Yoon 2008    | Case-control | Tracheal, bronchus, and lung cancer | Female | 30 - 71 | Home              | Spouse                       | Never smokers      | -1.323          | 0.346                              | 0.692                                       | Yes     |
| Yoon 2008    | Case-control | Tracheal, bronchus, and lung cancer | Female | 30 - 71 | Home              | Paternal                     | Never smokers      | -0.252          | 0.225                              | 0.450                                       | No      |
| Yoon 2008    | Case-control | Tracheal, bronchus, and lung cancer | Female | 30 - 71 | Home              | Maternal                     | Never smokers      | -0.478          | 0.274                              | 0.548                                       | No      |
| Yoon 2008    | Case-control | Tracheal, bronchus, and lung cancer | Female | 30 - 71 | Work              | Any                          | Never smokers      | 0.075           | 0.194                              | 0.388                                       | No      |
| Zaridze 1998 | Case-control | Tracheal, bronchus, and lung cancer | Female | 18 - 99 | Home              | Spouse                       | Never smokers      | 0.425           | 0.187                              | 0.325                                       | No      |

**Table S6. Summary of data inputs for tracheal, bronchus, and lung cancer**

| Author         | Study design | Health outcome                      | Sex    | Age     | Exposure location | Exposure source           | Smoking status                 | Log effect size | Original SE of the log effect size | SE of the log effect size used in the model | Outlier |
|----------------|--------------|-------------------------------------|--------|---------|-------------------|---------------------------|--------------------------------|-----------------|------------------------------------|---------------------------------------------|---------|
| Zaridze 1998   | Case-control | Tracheal, bronchus, and lung cancer | Female | 18 - 99 | Home              | Other family (not spouse) | Never smokers                  | -0.094          | 0.228                              | 0.396                                       | No      |
| Zaridze 1998   | Case-control | Tracheal, bronchus, and lung cancer | Female | 18 - 99 | Work              | Any                       | Never smokers                  | -0.128          | 0.240                              | 0.416                                       | No      |
| Zatloukal 2003 | Case-control | Tracheal, bronchus, and lung cancer | Female | 25 - 89 | Other             | Any                       | Never smokers                  | -0.844          | 0.397                              | 0.397                                       | Yes     |
| Zhong 1999     | Case-control | Tracheal, bronchus, and lung cancer | Female | 35 - 69 | Home or work      | Any                       | Never smokers                  | 0.336           | 0.204                              | 0.288                                       | No      |
| Zhong 1999     | Case-control | Tracheal, bronchus, and lung cancer | Female | 35 - 69 | Home or work      | Any                       | Never smokers                  | 0.182           | 0.207                              | 0.293                                       | No      |
| Zhuang 2022    | Case-control | Tracheal, bronchus, and lung cancer | Both   | 18 - 99 | Other             | Any                       | Non-smokers (former and never) | 0.802           | 0.115                              | 0.115                                       | Yes     |

**Table S7. Summary of data inputs for breast cancer**

| Author                 | Study design        | Health outcome | Sex    | Age     | Exposure location | Exposure source              | Smoking status     | Log effect size | Original SE of the log effect size | SE of the log effect size used in the model | Outlier |
|------------------------|---------------------|----------------|--------|---------|-------------------|------------------------------|--------------------|-----------------|------------------------------------|---------------------------------------------|---------|
| Ahern 2009             | Case-control        | Breast cancer  | Female | 28 - 75 | Home or work      | Any                          | Never smokers      | 0.000           | 0.312                              | 0.441                                       | No      |
| Ahern 2009             | Case-control        | Breast cancer  | Female | 28 - 75 | Home or work      | Any                          | Never smokers      | -0.357          | 0.337                              | 0.477                                       | No      |
| Alberg 2004            | Nested case-control | Breast cancer  | Female | 18 - 99 | Home              | Spouse                       | Never smokers      | 0.182           | 0.358                              | 0.358                                       | No      |
| Anderson 2012          | Case-control        | Breast cancer  | Female | 25 - 74 | Home              | Family (anyone in household) | Never smokers      | 0.129           | 0.093                              | 0.132                                       | No      |
| Anderson 2012          | Case-control        | Breast cancer  | Female | 25 - 74 | Work              | Any                          | Never smokers      | 0.023           | 0.094                              | 0.133                                       | No      |
| Bonner 2005            | Case-control        | Breast cancer  | Female | 35 - 79 | Home or work      | Any                          | Never smokers      | 0.104           | 0.325                              | 0.460                                       | No      |
| Bonner 2005            | Case-control        | Breast cancer  | Female | 35 - 79 | Home or work      | Any                          | Never smokers      | -0.223          | 0.204                              | 0.288                                       | No      |
| Chaveepojnkamjorn 2017 | Case-control        | Breast cancer  | Female | 25 - 44 | Other             | Any                          | Any smoking status | 0.798           | 0.213                              | 0.213                                       | Yes     |
| De 2010                | Case-control        | Breast cancer  | Female | 30 - 64 | Other             | Any                          | Never smokers      | 1.085           | 0.338                              | 0.338                                       | No      |
| Dianatinasab 2017      | Case-control        | Breast cancer  | Female | 18 - 99 | Home              | Parental                     | Any smoking status | 0.451           | 0.162                              | 0.162                                       | No      |
| Dossus 2014            | Prospective cohort  | Breast cancer  | Female | 18 - 99 | Home or work      | Any                          | Never smokers      | 0.095           | 0.044                              | 0.044                                       | No      |

**Table S7. Summary of data inputs for breast cancer**

| Author            | Study design       | Health outcome | Sex    | Age     | Exposure location | Exposure source              | Smoking status                 | Log effect size | Original SE of the log effect size | SE of the log effect size used in the model | Outlier |
|-------------------|--------------------|----------------|--------|---------|-------------------|------------------------------|--------------------------------|-----------------|------------------------------------|---------------------------------------------|---------|
| El-Sheikh 2021    | Case-control       | Breast cancer  | Female | 19 - 99 | Other             | Any                          | Non-smokers (former and never) | 1.636           | 0.477                              | 0.477                                       | Yes     |
| Fararouei 2019    | Case-control       | Breast cancer  | Female | 20 - 50 | Other             | Any                          | Any smoking status             | 0.536           | 0.146                              | 0.146                                       | No      |
| Fu 2015           | Case-control       | Breast cancer  | Female | 18 - 99 | Other             | Any                          | Any smoking status             | 1.573           | 0.310                              | 0.310                                       | Yes     |
| Gao 2013          | Case-control       | Breast cancer  | Female | 18 - 99 | Home              | Spouse                       | Any smoking status             | 0.372           | 0.119                              | 0.119                                       | No      |
| Hanaoka 2005      | Prospective cohort | Breast cancer  | Female | 40 - 59 | Home              | Family (anyone in household) | Never smokers                  | 0.000           | 0.177                              | 0.177                                       | No      |
| Hirose 1995       | Case-control       | Breast cancer  | Female | 20 - 99 | Home              | Spouse                       | Never smokers                  | 0.140           | 0.121                              | 0.171                                       | No      |
| Hirose 1995       | Case-control       | Breast cancer  | Female | 20 - 99 | Home              | Spouse                       | Never smokers                  | 0.329           | 0.147                              | 0.208                                       | No      |
| Hosseinzadeh 2014 | Case-control       | Breast cancer  | Female | 18 - 99 | Other             | Any                          | Any smoking status             | 1.015           | 0.307                              | 0.307                                       | Yes     |
| Hsieh 2014        | Case-control       | Breast cancer  | Female | 18 - 99 | Other             | Any                          | Any smoking status             | 1.224           | 0.182                              | 0.182                                       | Yes     |
| Hu 2013           | Case-control       | Breast cancer  | Female | 25 - 75 | Home or work      | Any                          | Any smoking status             | 0.432           | 0.252                              | 0.252                                       | No      |
| Ilic 2013         | Case-control       | Breast cancer  | Female | 18 - 99 | Home or work      | Any                          | Never smokers                  | 0.451           | 0.337                              | 0.337                                       | No      |
| Jee 1999          | Prospective cohort | Breast cancer  | Female | 40 - 88 | Home              | Spouse                       | Never smokers                  | 0.262           | 0.177                              | 0.177                                       | No      |

**Table S7. Summary of data inputs for breast cancer**

| Author       | Study design | Health outcome | Sex    | Age     | Exposure location | Exposure source              | Smoking status | Log effect size | Original SE of the log effect size | SE of the log effect size used in the model | Outlier |
|--------------|--------------|----------------|--------|---------|-------------------|------------------------------|----------------|-----------------|------------------------------------|---------------------------------------------|---------|
| Johnson 2000 | Case-control | Breast cancer  | Female | 25 - 74 | Home or work      | Any                          | Never smokers  | 0.956           | 0.433                              | 0.866                                       | No      |
| Johnson 2000 | Case-control | Breast cancer  | Female | 25 - 74 | Home or work      | Any                          | Never smokers  | 0.956           | 0.388                              | 0.777                                       | No      |
| Johnson 2000 | Case-control | Breast cancer  | Female | 25 - 74 | Home or work      | Any                          | Former smokers | 0.470           | 0.496                              | 0.993                                       | No      |
| Johnson 2000 | Case-control | Breast cancer  | Female | 25 - 74 | Home or work      | Any                          | Former smokers | 0.956           | 0.359                              | 0.717                                       | No      |
| Johnson 2000 | Case-control | Breast cancer  | Female | 25 - 74 | Home or work      | Any                          | Never smokers  | 0.095           | 0.280                              | 0.561                                       | No      |
| Johnson 2000 | Case-control | Breast cancer  | Female | 25 - 74 | Home or work      | Any                          | Never smokers  | 0.262           | 0.234                              | 0.467                                       | No      |
| Johnson 2000 | Case-control | Breast cancer  | Female | 25 - 74 | Home or work      | Any                          | Former smokers | 0.588           | 0.312                              | 0.624                                       | No      |
| Johnson 2000 | Case-control | Breast cancer  | Female | 25 - 74 | Home or work      | Any                          | Former smokers | 0.262           | 0.234                              | 0.467                                       | No      |
| Kariri 2017  | Case-control | Breast cancer  | Female | 18 - 60 | Other             | Any                          | Unknown        | 0.435           | 0.241                              | 0.241                                       | No      |
| Lash 1999    | Case-control | Breast cancer  | Female | 18 - 99 | Home              | Family (anyone in household) | Never smokers  | 0.693           | 0.309                              | 0.309                                       | No      |
| Lash 2002    | Case-control | Breast cancer  | Female | 18 - 99 | Home              | Family (anyone in household) | Never smokers  | -0.163          | 0.142                              | 0.142                                       | No      |
| Li 2015      | Case-control | Breast cancer  | Female | 25 - 70 | Home or work      | Any                          | Never smokers  | 0.300           | 0.101                              | 0.101                                       | No      |

**Table S7. Summary of data inputs for breast cancer**

| Author        | Study design       | Health outcome | Sex    | Age         | Exposure location | Exposure source              | Smoking status     | Log effect size | Original SE of the log effect size | SE of the log effect size used in the model | Outlier |
|---------------|--------------------|----------------|--------|-------------|-------------------|------------------------------|--------------------|-----------------|------------------------------------|---------------------------------------------|---------|
| Lin 2008      | Prospective cohort | Breast cancer  | Female | 40 - 79     | Home              | Family (anyone in household) | Never smokers      | -0.528          | 0.295                              | 0.418                                       | No      |
| Lin 2008      | Prospective cohort | Breast cancer  | Female | 40 - 79     | Home              | Family (anyone in household) | Never smokers      | -0.342          | 0.200                              | 0.282                                       | No      |
| Liu 2000      | Case-control       | Breast cancer  | Female | 24 - 55     | Home              | Family (anyone in household) | Never smokers      | 1.404           | 0.312                              | 0.441                                       | Yes     |
| Liu 2000      | Case-control       | Breast cancer  | Female | 24 - 55     | Work              | Any                          | Never smokers      | 0.239           | 0.102                              | 0.144                                       | No      |
| Luo 2011      | Prospective cohort | Breast cancer  | Female | 50 - 79     | Home and work     | Any                          | Never smokers      | 0.140           | 0.106                              | 0.184                                       | No      |
| Luo 2011      | Prospective cohort | Breast cancer  | Female | 50 - 79     | Home              | Family (anyone in household) | Never smokers      | -0.094          | 0.135                              | 0.234                                       | No      |
| Luo 2011      | Prospective cohort | Breast cancer  | Female | 50 - 79     | Work              | Any                          | Never smokers      | 0.010           | 0.110                              | 0.190                                       | No      |
| Marzouk 2009  | Case-control       | Breast cancer  | Female | 18 - 59     | Home              | Family (anyone in household) | Any smoking status | 0.642           | 0.234                              | 0.234                                       | No      |
| Metsola 2005  | Case-control       | Breast cancer  | Female | 37.5 - 91.6 | Home or work      | Any                          | Never smokers      | -0.248          | 0.154                              | 0.154                                       | No      |
| Millikan 1998 | Case-control       | Breast cancer  | Female | 20 - 74     | Home              | Family (anyone in household) | Never smokers      | 0.262           | 0.191                              | 0.191                                       | No      |

**Table S7. Summary of data inputs for breast cancer**

| Author        | Study design       | Health outcome | Sex    | Age     | Exposure location | Exposure source              | Smoking status     | Log effect size | Original SE of the log effect size | SE of the log effect size used in the model | Outlier |
|---------------|--------------------|----------------|--------|---------|-------------------|------------------------------|--------------------|-----------------|------------------------------------|---------------------------------------------|---------|
| Morabia 1996  | Case-control       | Breast cancer  | Female | 30 - 74 | Home              | Spouse                       | Never smokers      | 1.131           | 0.341                              | 0.341                                       | Yes     |
| Niehoff 2017  | Case-control       | Breast cancer  | Female | 20 - 98 | Home              | Spouse                       | Any smoking status | 0.278           | 0.098                              | 0.098                                       | No      |
| Nishino 2001  | Prospective cohort | Breast cancer  | Female | 40 - 99 | Home              | Family (anyone in household) | Never smokers      | -0.562          | 0.381                              | 0.381                                       | No      |
| Nishino 2014  | Case-control       | Breast cancer  | Female | 30 - 99 | Home              | Spouse                       | Never smokers      | 0.122           | 0.131                              | 0.262                                       | No      |
| Nishino 2014  | Case-control       | Breast cancer  | Female | 30 - 99 | Home              | Spouse                       | Never smokers      | -0.010          | 0.252                              | 0.504                                       | No      |
| Nishino 2014  | Case-control       | Breast cancer  | Female | 30 - 99 | Home              | Spouse                       | Never smokers      | 0.542           | 0.572                              | 1.144                                       | No      |
| Nishino 2014  | Case-control       | Breast cancer  | Female | 30 - 99 | Home              | Spouse                       | Never smokers      | 0.157           | 0.172                              | 0.344                                       | No      |
| Pimhanam 2014 | Case-control       | Breast cancer  | Female | 17 - 76 | Other             | Any                          | Never smokers      | 0.820           | 0.285                              | 0.285                                       | No      |
| Pirie 2008    | Prospective cohort | Breast cancer  | Female | 50 - 64 | Home              | Family (anyone in household) | Never smokers      | 0.030           | 0.071                              | 0.101                                       | No      |
| Pirie 2008    | Prospective cohort | Breast cancer  | Female | 50 - 64 | Home              | Spouse                       | Never smokers      | 0.020           | 0.068                              | 0.096                                       | No      |
| Reynolds 2009 | Prospective cohort | Breast cancer  | Female | 20 - 99 | Home              | Family (anyone in household) | Never smokers      | 0.039           | 0.059                              | 0.084                                       | No      |

**Table S7. Summary of data inputs for breast cancer**

| Author           | Study design       | Health outcome | Sex    | Age     | Exposure location | Exposure source              | Smoking status | Log effect size | Original SE of the log effect size | SE of the log effect size used in the model | Outlier |
|------------------|--------------------|----------------|--------|---------|-------------------|------------------------------|----------------|-----------------|------------------------------------|---------------------------------------------|---------|
| Reynolds 2009    | Prospective cohort | Breast cancer  | Female | 20 - 99 | Work              | Any                          | Never smokers  | 0.020           | 0.050                              | 0.070                                       | No      |
| Roddam 2007      | Case-control       | Breast cancer  | Female | 36 - 45 | Home              | Spouse                       | Never smokers  | -0.117          | 0.171                              | 0.171                                       | No      |
| Roddam 2007      | Case-control       | Breast cancer  | Female | 36 - 45 | Home              | Spouse                       | Former smokers | 0.086           | 0.187                              | 0.187                                       | No      |
| Rollison 2008    | Case-control       | Breast cancer  | Female | 40 - 79 | Work              | Any                          | Never smokers  | -0.223          | 0.253                              | 0.358                                       | No      |
| Rollison 2008    | Case-control       | Breast cancer  | Female | 40 - 79 | Home              | Family (anyone in household) | Never smokers  | 0.058           | 0.327                              | 0.463                                       | No      |
| Shrubsole 2004   | Case-control       | Breast cancer  | Female | 25 - 64 | Home              | Spouse                       | Never smokers  | 0.000           | 0.103                              | 0.103                                       | No      |
| Smith 1994       | Case-control       | Breast cancer  | Female | 18 - 35 | Home or work      | Any                          | Never smokers  | 1.141           | 0.741                              | 0.741                                       | No      |
| Strumylaite 2017 | Case-control       | Breast cancer  | Female | 28 - 90 | Work              | Any                          | Never smokers  | 0.010           | 0.171                              | 0.297                                       | No      |
| Strumylaite 2017 | Case-control       | Breast cancer  | Female | 28 - 90 | Home              | Family (anyone in household) | Never smokers  | 0.631           | 0.157                              | 0.271                                       | No      |
| Strumylaite 2017 | Case-control       | Breast cancer  | Female | 28 - 90 | Home and work     | Any                          | Never smokers  | 1.030           | 0.214                              | 0.370                                       | No      |
| Tang 2013        | Case-control       | Breast cancer  | Female | 18 - 99 | Home or work      | Any                          | Never smokers  | 0.385           | 0.112                              | 0.112                                       | No      |
| Tong 2014        | Case-control       | Breast cancer  | Female | 18 - 99 | Home              | Spouse                       | Never smokers  | 0.378           | 0.168                              | 0.168                                       | No      |



**Table S7. Summary of data inputs for breast cancer**

| Author          | Study design        | Health outcome | Sex    | Age     | Exposure location | Exposure source              | Smoking status     | Log effect size | Original SE of the log effect size | SE of the log effect size used in the model | Outlier |
|-----------------|---------------------|----------------|--------|---------|-------------------|------------------------------|--------------------|-----------------|------------------------------------|---------------------------------------------|---------|
| Wartenberg 2000 | Prospective cohort  | Breast cancer  | Female | 30 - 99 | Home              | Spouse                       | Never smokers      | 0.000           | 0.103                              | 0.103                                       | No      |
| White 2017      | Prospective cohort  | Breast cancer  | Female | 35 - 74 | Other             | Any                          | Never smokers      | -0.151          | 0.077                              | 0.077                                       | Yes     |
| Woo 2000        | Nested case-control | Breast cancer  | Female | 18 - 99 | Home              | Family (anyone in household) | Never smokers      | 0.039           | 0.120                              | 0.120                                       | No      |
| Xue 2011        | Prospective cohort  | Breast cancer  | Female | 30 - 55 | Home or work      | Any                          | Never smokers      | 0.086           | 0.058                              | 0.117                                       | No      |
| Xue 2011        | Prospective cohort  | Breast cancer  | Female | 30 - 55 | Home or work      | Any                          | Never smokers      | 0.000           | 0.076                              | 0.153                                       | No      |
| Xue 2011        | Prospective cohort  | Breast cancer  | Female | 30 - 55 | Home or work      | Any                          | Never smokers      | -0.010          | 0.079                              | 0.159                                       | No      |
| Xue 2011        | Prospective cohort  | Breast cancer  | Female | 30 - 55 | Home or work      | Any                          | Never smokers      | -0.030          | 0.092                              | 0.183                                       | No      |
| Yassin 2018     | Case-control        | Breast cancer  | Female | 18 - 99 | Other             | Any                          | Any smoking status | 0.470           | 0.234                              | 0.234                                       | No      |
| Zahali 2021     | Case-control        | Breast cancer  | Female | 21 - 59 | Home              | Family (anyone in household) | Never smokers      | 0.775           | 0.323                              | 0.457                                       | No      |
| Zahali 2021     | Case-control        | Breast cancer  | Female | 21 - 59 | Work              | Any                          | Never smokers      | -0.062          | 0.516                              | 0.730                                       | No      |
| Zhao 1999       | Case-control        | Breast cancer  | Female | 26 - 82 | Other             | Any                          | Unknown            | 0.793           | 0.222                              | 0.222                                       | No      |

**Table S8. Summary of data inputs for asthma**

| Author             | Study design       | Health outcome | Sex  | Age          | Exposure location | Exposure source              | Smoking status     | Log effect size | Original SE of the log effect size | SE of the log effect size used in the model | Outlier |
|--------------------|--------------------|----------------|------|--------------|-------------------|------------------------------|--------------------|-----------------|------------------------------------|---------------------------------------------|---------|
| Al-Kubaisy 2005    | Prospective cohort | Asthma         | Both | 6 - 12       | Home              | Maternal                     | Adj never smokers  | 0.747           | 0.314                              | 0.444                                       | No      |
| Al-Kubaisy 2005    | Prospective cohort | Asthma         | Both | 6 - 12       | Home              | Paternal                     | Adj never smokers  | 0.698           | 0.106                              | 0.150                                       | Yes     |
| Al-Qerem 2016      | Prospective cohort | Asthma         | Both | 7 - 12       | Home              | Family (anyone in household) | Never smokers      | 0.854           | 0.180                              | 0.180                                       | Yes     |
| Arif 2017          | Case-control       | Asthma         | Both | 2 - 14       | Home              | Parental                     | Never smokers      | 0.243           | 0.285                              | 0.285                                       | No      |
| Aversa 2021        | Prospective cohort | Asthma         | Both | 0 - 0        | Home              | Maternal                     | Never smokers      | 0.329           | 0.082                              | 0.082                                       | No      |
| Azizi 1995         | Case-control       | Asthma         | Both | 0.083 - 5    | Home              | Family (anyone in household) | Never smokers      | 0.647           | 0.266                              | 0.266                                       | No      |
| Balemans 2006      | Prospective cohort | Asthma         | Both | 2 - 21       | Home              | Maternal                     | Any smoking status | 0.470           | 0.244                              | 0.244                                       | No      |
| Beijsterveldt 2008 | Prospective cohort | Asthma         | Both | 0.25 - 0.999 | Home              | Paternal                     | Never smokers      | 0.077           | 0.059                              | 0.059                                       | No      |
| Bener 2007         | Case-control       | Asthma         | Both | 6 - 13       | Home              | Paternal                     | Adj never smokers  | 0.928           | 0.137                              | 0.137                                       | Yes     |
| Bergmann 2000      | Prospective cohort | Asthma         | Both | 0 - 0        | Home              | Family (anyone in household) | Never smokers      | 0.276           | 0.204                              | 0.204                                       | No      |
| Boker 2019         | Case-control       | Asthma         | Both | 2 - 14       | Home              | Parental                     | Never smokers      | -0.288          | 0.226                              | 0.226                                       | No      |

**Table S8. Summary of data inputs for asthma**

| Author          | Study design       | Health outcome | Sex    | Age       | Exposure location | Exposure source              | Smoking status     | Log effect size | Original SE of the log effect size | SE of the log effect size used in the model | Outlier |
|-----------------|--------------------|----------------|--------|-----------|-------------------|------------------------------|--------------------|-----------------|------------------------------------|---------------------------------------------|---------|
| Boneberger 2011 | Case-control       | Asthma         | Both   | 6 - 15    | Home              | Family (anyone in household) | Never smokers      | 0.086           | 0.225                              | 0.225                                       | No      |
| Bozicević 2000  | Case-control       | Asthma         | Male   | 18 - 73   | Home              | Family (anyone in household) | Any smoking status | 0.182           | 0.419                              | 0.593                                       | No      |
| Bozicević 2000  | Case-control       | Asthma         | Female | 18 - 73   | Home              | Family (anyone in household) | Any smoking status | 0.713           | 0.374                              | 0.528                                       | No      |
| Bozicević 2000  | Case-control       | Asthma         | Male   | 18 - 73   | Work              | Any                          | Any smoking status | 1.004           | 0.486                              | 0.688                                       | No      |
| Bozicević 2000  | Case-control       | Asthma         | Female | 18 - 73   | Work              | Any                          | Any smoking status | 1.256           | 0.382                              | 0.541                                       | No      |
| Butland 1997    | Case-control       | Asthma         | Both   | 7.5 - 8.5 | Home              | Paternal                     | Never smokers      | 0.039           | 0.182                              | 0.182                                       | No      |
| Carlsten 2012   | Prospective cohort | Asthma         | Both   | 0 - 0     | Home              | Family (anyone in household) | Never smokers      | 0.531           | 0.397                              | 0.397                                       | No      |
| Carr 2019       | Prospective cohort | Asthma         | Both   | 0 - 0     | Home              | Maternal                     | Never smokers      | 0.405           | 0.261                              | 0.261                                       | No      |
| Carrasco 2021   | Prospective cohort | Asthma         | Both   | 0 - 0     | Home              | Family (anyone in household) | Never smokers      | 0.385           | 0.123                              | 0.123                                       | No      |
| Chan 2019       | Case-crossover     | Asthma         | Both   | 18 - 73   | Home and work     | Any                          | Never smokers      | 0.806           | 0.167                              | 0.167                                       | Yes     |
| Charoenc 2013   | Case-control       | Asthma         | Both   | 0 - 4     | Home              | Any                          | Never smokers      | 1.340           | 0.222                              | 0.222                                       | Yes     |

**Table S8. Summary of data inputs for asthma**

| Author         | Study design        | Health outcome | Sex    | Age     | Exposure location | Exposure source              | Smoking status                 | Log effect size | Original SE of the log effect size | SE of the log effect size used in the model | Outlier |
|----------------|---------------------|----------------|--------|---------|-------------------|------------------------------|--------------------------------|-----------------|------------------------------------|---------------------------------------------|---------|
| Chen 2011      | Nested case-control | Asthma         | Both   | 12 - 14 | Home              | Family (anyone in household) | Non-smokers (former and never) | 0.020           | 0.203                              | 0.203                                       | No      |
| Clark 1994     | Case-control        | Asthma         | Both   | 5 - 7   | Home              | Family (anyone in household) | Never smokers                  | -0.348          | 0.584                              | 0.584                                       | No      |
| Coogan 2015    | Prospective cohort  | Asthma         | Female | 21 - 69 | Home or work      | Any                          | Never smokers                  | 0.157           | 0.111                              | 0.111                                       | No      |
| Daigler 1991   | Case-control        | Asthma         | Both   | 0 - 15  | Home              | Maternal                     | Never smokers                  | 0.673           | 0.293                              | 0.293                                       | No      |
| David 2005     | Prospective cohort  | Asthma         | Both   | 45 - 74 | Home              | Any                          | Never smokers                  | 0.148           | 0.087                              | 0.087                                       | No      |
| Dekker 2015    | Prospective cohort  | Asthma         | Both   | 0 - 0   | Home              | Family (anyone in household) | Never smokers                  | 0.058           | 0.258                              | 0.258                                       | No      |
| Ehrlich 1992   | Case-control        | Asthma         | Both   | 3 - 14  | Home              | Maternal                     | Adj never smokers              | 0.693           | 0.288                              | 0.288                                       | No      |
| Ehrlich 1996   | Case-control        | Asthma         | Both   | 7 - 8   | Home              | Maternal                     | Never smokers                  | 0.285           | 0.218                              | 0.218                                       | No      |
| El-Sharif 2003 | Case-control        | Asthma         | Both   | 6 - 12  | Home              | Family (anyone in household) | Never smokers                  | 0.269           | 0.280                              | 0.280                                       | No      |
| Elder 1996     | Prospective cohort  | Asthma         | Both   | 0 - 0   | Home              | Maternal                     | Never smokers                  | 0.322           | 0.441                              | 0.441                                       | No      |
| Fagbule 1994   | Case-control        | Asthma         | Both   | 0 - 15  | Home              | Parental                     | Never smokers                  | 0.344           | 0.264                              | 0.264                                       | No      |

**Table S8. Summary of data inputs for asthma**

| Author             | Study design       | Health outcome | Sex  | Age     | Exposure location | Exposure source              | Smoking status                 | Log effect size | Original SE of the log effect size | SE of the log effect size used in the model | Outlier |
|--------------------|--------------------|----------------|------|---------|-------------------|------------------------------|--------------------------------|-----------------|------------------------------------|---------------------------------------------|---------|
| Fernando 2009      | Case-control       | Asthma         | Both | 5 - 12  | Home              | Family (anyone in household) | Never smokers                  | 1.605           | 0.445                              | 0.445                                       | Yes     |
| Flexeder 2019      | Prospective cohort | Asthma         | Both | 20 - 44 | Other             | Any                          | Non-smokers (former and never) | 0.993           | 0.406                              | 0.406                                       | No      |
| Flodin 1995        | Case-control       | Asthma         | Both | 20 - 65 | Work              | Any                          | Any smoking status             | 0.405           | 0.291                              | 0.291                                       | No      |
| Frassanito 2022    | Case-control       | Asthma         | Both | 6 - 6   | Other             | Any                          | Adj never smokers              | -0.223          | 0.384                              | 0.384                                       | No      |
| Galobardes 2015    | Prospective cohort | Asthma         | Both | 0 - 0   | Home              | Family (anyone in household) | Never smokers                  | 0.285           | 0.117                              | 0.117                                       | No      |
| Genuneit 2006      | Prospective cohort | Asthma         | Both | 9 - 11  | Home              | Family (anyone in household) | Non-smokers (former and never) | 0.693           | 0.443                              | 0.443                                       | No      |
| Goksör 2006        | Prospective cohort | Asthma         | Both | 0 - 1   | Other             | Any                          | Never smokers                  | 1.131           | 0.566                              | 0.566                                       | No      |
| Grabenhenrich 2014 | Prospective cohort | Asthma         | Both | 0 - 0   | Home              | Family (anyone in household) | Never smokers                  | -0.400          | 0.247                              | 0.247                                       | No      |
| Guo 2019           | Case-control       | Asthma         | Both | 0 - 9   | Home              | Family (anyone in household) | Never smokers                  | -0.300          | 0.381                              | 0.381                                       | No      |
| Hadnadjev 2011     | Case-control       | Asthma         | Both | 7 - 14  | Home              | Any                          | Adj never smokers              | -0.236          | 0.200                              | 0.200                                       | No      |

**Table S8. Summary of data inputs for asthma**

| Author           | Study design       | Health outcome | Sex  | Age     | Exposure location | Exposure source              | Smoking status                 | Log effect size | Original SE of the log effect size | SE of the log effect size used in the model | Outlier |
|------------------|--------------------|----------------|------|---------|-------------------|------------------------------|--------------------------------|-----------------|------------------------------------|---------------------------------------------|---------|
| Hagendorens 2005 | Prospective cohort | Asthma         | Both | 0 - 0   | Other             | Any                          | Never smokers                  | 1.197           | 0.312                              | 0.312                                       | Yes     |
| Hedman 2011      | Prospective cohort | Asthma         | Both | 7 - 8   | Home              | Maternal                     | Non-smokers (former and never) | 0.351           | 0.142                              | 0.142                                       | No      |
| Horwood 1985     | Prospective cohort | Asthma         | Both | 0 - 0   | Home              | Parental                     | Never smokers                  | -0.151          | 0.237                              | 0.237                                       | No      |
| Huang 2022       | Case-control       | Asthma         | Both | 3 - 18  | Home              | Family (anyone in household) | Never smokers                  | 0.207           | 0.379                              | 0.379                                       | No      |
| Hunt 2011        | Prospective cohort | Asthma         | Both | 0 - 0   | Home              | Family (anyone in household) | Never smokers                  | 0.489           | 0.451                              | 0.451                                       | No      |
| Hwang 2011       | Case-control       | Asthma         | Both | 1 - 7   | Home              | Family (anyone in household) | Never smokers                  | 0.000           | 0.182                              | 0.182                                       | No      |
| Håberg 2007      | Prospective cohort | Asthma         | Both | 0 - 0   | Home              | Maternal                     | Never smokers                  | -0.083          | 0.069                              | 0.098                                       | No      |
| Håberg 2007      | Prospective cohort | Asthma         | Both | 0 - 0   | Home              | Paternal                     | Never smokers                  | 0.174           | 0.049                              | 0.070                                       | No      |
| Izuhara 2016     | Prospective cohort | Asthma         | Both | 30 - 75 | Other             | Any                          | Unknown                        | 0.293           | 0.129                              | 0.129                                       | No      |
| Jaakkola 2001    | Prospective cohort | Asthma         | Both | 0 - 0   | Home              | Family (anyone in household) | Never smokers                  | 0.095           | 0.169                              | 0.169                                       | No      |
| Jaakkola 2003    | Case-control       | Asthma         | Both | 21 - 63 | Home and work     | Any                          | Never smokers                  | 0.507           | 0.263                              | 0.456                                       | No      |

**Table S8. Summary of data inputs for asthma**

| Author            | Study design       | Health outcome | Sex  | Age          | Exposure location | Exposure source              | Smoking status                 | Log effect size | Original SE of the log effect size | SE of the log effect size used in the model | Outlier |
|-------------------|--------------------|----------------|------|--------------|-------------------|------------------------------|--------------------------------|-----------------|------------------------------------|---------------------------------------------|---------|
| Jaakkola 2003     | Case-control       | Asthma         | Both | 21 - 63      | Work              | Any                          | Never smokers                  | 0.604           | 0.285                              | 0.494                                       | No      |
| Jaakkola 2003     | Case-control       | Asthma         | Both | 21 - 63      | Home              | Any                          | Never smokers                  | 1.343           | 0.690                              | 1.195                                       | No      |
| Jedrychowski 2008 | Prospective cohort | Asthma         | Both | 0 - 0        | Home              | Family (anyone in household) | Never smokers                  | -0.094          | 0.555                              | 0.961                                       | No      |
| Jedrychowski 2008 | Prospective cohort | Asthma         | Both | 0 - 0        | Home              | Family (anyone in household) | Never smokers                  | 0.220           | 0.566                              | 0.981                                       | No      |
| Jedrychowski 2008 | Prospective cohort | Asthma         | Both | 0 - 0        | Home              | Family (anyone in household) | Never smokers                  | -0.216          | 0.653                              | 1.131                                       | No      |
| Kamran 2015       | Case-control       | Asthma         | Both | 1 - 15       | Home              | Parental                     | Unknown                        | 1.504           | 0.274                              | 0.274                                       | Yes     |
| Kanoh 2012        | Prospective cohort | Asthma         | Both | 0.5 - 0.5    | Home              | Maternal                     | Never smokers                  | 0.215           | 0.056                              | 0.079                                       | No      |
| Kanoh 2012        | Prospective cohort | Asthma         | Both | 0.5 - 0.5    | Home              | Paternal                     | Never smokers                  | 0.039           | 0.042                              | 0.059                                       | No      |
| Karunasekera 2001 | Case-control       | Asthma         | Both | 1 - 10       | Other             | Any                          | Adj never smokers              | 0.095           | 0.177                              | 0.177                                       | No      |
| Khozime 2019      | Case-control       | Asthma         | Both | 5 - 70       | Home              | Family (anyone in household) | Non-smokers (former and never) | 1.728           | 0.443                              | 0.443                                       | Yes     |
| Kim 2018          | Case-cohort        | Asthma         | Both | 5.68 - 12.16 | Other             | Any                          | Never smokers                  | 0.491           | 0.118                              | 0.118                                       | No      |

**Table S8. Summary of data inputs for asthma**

| Author              | Study design       | Health outcome | Sex  | Age         | Exposure location | Exposure source              | Smoking status    | Log effect size | Original SE of the log effect size | SE of the log effect size used in the model | Outlier |
|---------------------|--------------------|----------------|------|-------------|-------------------|------------------------------|-------------------|-----------------|------------------------------------|---------------------------------------------|---------|
| Klinnert 2001       | Prospective cohort | Asthma         | Both | 0 - 0       | Home              | Maternal                     | Never smokers     | 0.432           | 0.469                              | 0.469                                       | No      |
| Kobyletzki 2012     | Prospective cohort | Asthma         | Both | 1 - 2       | Home              | Parental                     | Never smokers     | -0.083          | 0.341                              | 0.341                                       | No      |
| Kumar 2021          | Case-control       | Asthma         | Both | 6 - 12      | Home              | Maternal                     | Adj never smokers | 1.637           | 0.540                              | 0.540                                       | No      |
| Kurukulaarachy 2006 | Prospective cohort | Asthma         | Both | 0 - 0       | Home              | Parental                     | Never smokers     | 0.751           | 0.335                              | 0.474                                       | No      |
| Kurukulaarachy 2006 | Prospective cohort | Asthma         | Both | 0 - 0       | Home              | Parental                     | Never smokers     | 1.082           | 0.531                              | 0.751                                       | No      |
| Lawson 2014         | Prospective cohort | Asthma         | Both | 12 - 18     | Home              | Family (anyone in household) | Never smokers     | 0.723           | 0.247                              | 0.247                                       | No      |
| Leen 1994           | Case-control       | Asthma         | Both | 0 - 15      | Home              | Family (anyone in household) | Unknown           | -0.280          | 0.279                              | 0.279                                       | No      |
| Lemanske 2005       | Prospective cohort | Asthma         | Both | 0 - 0       | Other             | Any                          | Never smokers     | 0.262           | 0.406                              | 0.406                                       | No      |
| Li 2013             | Prospective cohort | Asthma         | Both | 2 - 11      | Home              | Maternal                     | Never smokers     | 0.425           | 0.017                              | 0.017                                       | Yes     |
| Lilljeqvist 1997    | Case-control       | Asthma         | Both | 7 - 10      | Home              | Parental                     | Never smokers     | 0.085           | 0.154                              | 0.154                                       | No      |
| Litonjua 2001       | Prospective cohort | Asthma         | Both | 0 - 0.00548 | Home              | Family (anyone in household) | Never smokers     | 1.292           | 0.707                              | 0.707                                       | No      |



**Table S8. Summary of data inputs for asthma**

| Author             | Study design        | Health outcome | Sex  | Age       | Exposure location | Exposure source              | Smoking status     | Log effect size | Original SE of the log effect size | SE of the log effect size used in the model | Outlier |
|--------------------|---------------------|----------------|------|-----------|-------------------|------------------------------|--------------------|-----------------|------------------------------------|---------------------------------------------|---------|
| Majeed 2008        | Case-control        | Asthma         | Both | 1 - 8     | Home              | Family (anyone in household) | Adj never smokers  | 0.788           | 0.348                              | 0.348                                       | No      |
| Marbury 1996       | Prospective cohort  | Asthma         | Both | 0 - 0.167 | Home              | Maternal                     | Never smokers      | 0.742           | 0.177                              | 0.177                                       | Yes     |
| McConnell 2002     | Prospective cohort  | Asthma         | Both | 9 - 16    | Home              | Maternal                     | Any smoking status | -0.105          | 0.280                              | 0.280                                       | No      |
| McKeever 2001      | Prospective cohort  | Asthma         | Both | 0 - 0     | Home              | Maternal                     | Adj never smokers  | 0.307           | 0.034                              | 0.048                                       | No      |
| McKeever 2001      | Prospective cohort  | Asthma         | Both | 0 - 0     | Home              | Paternal                     | Adj never smokers  | 0.293           | 0.042                              | 0.059                                       | No      |
| Melsom 2001        | Nested case-control | Asthma         | Both | 11 - 17   | Home              | Family (anyone in household) | Unknown            | 0.642           | 0.347                              | 0.347                                       | No      |
| Midodzi 2010       | Prospective cohort  | Asthma         | Both | 0 - 1     | Home              | Parental                     | Never smokers      | 0.199           | 0.058                              | 0.058                                       | No      |
| Milanzi 2017       | Prospective cohort  | Asthma         | Both | 0 - 0     | Other             | Any                          | Never smokers      | 0.000           | 0.211                              | 0.211                                       | No      |
| Milner 2004        | Prospective cohort  | Asthma         | Both | 0 - 0     | Home              | Family (anyone in household) | Never smokers      | 0.438           | 0.077                              | 0.077                                       | Yes     |
| Mommers 2005       | Nested case-control | Asthma         | Both | 7 - 8     | Other             | Any                          | Adj never smokers  | 0.166           | 0.229                              | 0.229                                       | No      |
| Morfin-Maciel 2006 | Case-control        | Asthma         | Both | 13 - 14   | Home              | Maternal                     | Any smoking status | 0.884           | 0.212                              | 0.212                                       | Yes     |

**Table S8. Summary of data inputs for asthma**

| Author             | Study design       | Health outcome | Sex  | Age             | Exposure location | Exposure source              | Smoking status    | Log effect size | Original SE of the log effect size | SE of the log effect size used in the model | Outlier |
|--------------------|--------------------|----------------|------|-----------------|-------------------|------------------------------|-------------------|-----------------|------------------------------------|---------------------------------------------|---------|
| Morfín-Maciel 2006 | Case-control       | Asthma         | Both | 13 - 14         | Home              | Family (anyone in household) | Adj never smokers | 0.519           | 0.181                              | 0.181                                       | No      |
| Mpairwe 2019       | Case-control       | Asthma         | Both | 5 - 17          | Home              | Family (anyone in household) | Never smokers     | 0.231           | 0.171                              | 0.171                                       | No      |
| Mumcuoglu 1994     | Case-control       | Asthma         | Both | 3 - 15          | Home              | Paternal                     | Unknown           | -0.056          | 0.235                              | 0.332                                       | No      |
| Mumcuoglu 1994     | Case-control       | Asthma         | Both | 3 - 15          | Home              | Other family (not spouse)    | Unknown           | 0.289           | 0.393                              | 0.556                                       | No      |
| Murray 2004        | Prospective cohort | Asthma         | Both | 0 - 3           | Home              | Maternal                     | Never smokers     | 0.582           | 0.275                              | 0.275                                       | No      |
| Muñoz 2012         | Case-control       | Asthma         | Both | 6 - 9           | Home              | Family (anyone in household) | Never smokers     | -0.004          | 0.425                              | 0.425                                       | No      |
| Neuman 2012        | Prospective cohort | Asthma         | Both | 0 - 0           | Home              | Maternal                     | Never smokers     | -0.288          | 0.229                              | 0.459                                       | No      |
| Neuman 2012        | Prospective cohort | Asthma         | Both | 0 - 0           | Home              | Maternal                     | Never smokers     | 0.223           | 1.084                              | 2.168                                       | No      |
| Neuman 2012        | Prospective cohort | Asthma         | Both | 0.083 - 0.167   | Home              | Maternal                     | Never smokers     | 0.372           | 1.092                              | 1.544                                       | No      |
| Neuman 2012        | Prospective cohort | Asthma         | Both | 0 - 0           | Home              | Maternal                     | Never smokers     | 0.378           | 0.405                              | 0.810                                       | No      |
| Neuman 2012        | Prospective cohort | Asthma         | Both | 0.00822 - 0.011 | Home              | Maternal                     | Never smokers     | 0.718           | 0.549                              | 0.549                                       | No      |

**Table S8. Summary of data inputs for asthma**

| Author         | Study design         | Health outcome | Sex  | Age           | Exposure location | Exposure source              | Smoking status | Log effect size | Original SE of the log effect size | SE of the log effect size used in the model | Outlier |
|----------------|----------------------|----------------|------|---------------|-------------------|------------------------------|----------------|-----------------|------------------------------------|---------------------------------------------|---------|
| Neuman 2012    | Prospective cohort   | Asthma         | Both | 0.083 - 0.167 | Home              | Maternal                     | Never smokers  | -0.174          | 0.659                              | 0.931                                       | No      |
| Neuman 2012    | Prospective cohort   | Asthma         | Both | 0 - 0         | Home              | Maternal                     | Never smokers  | 0.507           | 0.536                              | 1.072                                       | No      |
| Nguyen 2010    | Nested case-control  | Asthma         | Both | 0 - 17        | Home              | Family (anyone in household) | Unknown        | -0.357          | 0.201                              | 0.201                                       | No      |
| Nguyen 2010    | Nested case-control  | Asthma         | Both | 18 - 99       | Home              | Family (anyone in household) | Unknown        | -0.105          | 0.115                              | 0.115                                       | No      |
| Norbäck 2018   | Retrospective cohort | Asthma         | Both | 0 - 0         | Home              | Family (anyone in household) | Never smokers  | 0.030           | 0.052                              | 0.052                                       | No      |
| O'Connell 1974 | Case-control         | Asthma         | Both | 2 - 16        | Home              | Parental                     | Unknown        | 0.265           | 0.172                              | 0.172                                       | No      |
| Oddy 1999      | Prospective cohort   | Asthma         | Both | 0 - 0         | Home              | Family (anyone in household) | Never smokers  | 0.239           | 0.102                              | 0.102                                       | No      |
| Palvo 2008     | Case-control         | Asthma         | Both | 6 - 7         | Home              | Family (anyone in household) | Never smokers  | 0.358           | 0.125                              | 0.125                                       | No      |
| Patrick 2020   | Prospective cohort   | Asthma         | Both | 0 - 0         | Home              | Family (anyone in household) | Never smokers  | 0.207           | 0.224                              | 0.224                                       | No      |
| Pattimore 2018 | Prospective cohort   | Asthma         | Both | 0 - 0         | Home              | Maternal                     | Never smokers  | 0.698           | 0.609                              | 1.492                                       | No      |

**Table S8. Summary of data inputs for asthma**

| Author         | Study design         | Health outcome | Sex  | Age     | Exposure location | Exposure source              | Smoking status | Log effect size | Original SE of the log effect size | SE of the log effect size used in the model | Outlier |
|----------------|----------------------|----------------|------|---------|-------------------|------------------------------|----------------|-----------------|------------------------------------|---------------------------------------------|---------|
| Pattemore 2018 | Prospective cohort   | Asthma         | Both | 0 - 0   | Home              | Maternal                     | Never smokers  | 0.451           | 0.535                              | 1.311                                       | No      |
| Pattemore 2018 | Prospective cohort   | Asthma         | Both | 0 - 0   | Home              | Maternal                     | Never smokers  | 0.412           | 0.507                              | 1.241                                       | No      |
| Pattemore 2018 | Prospective cohort   | Asthma         | Both | 0 - 0   | Home              | Maternal                     | Never smokers  | -0.105          | 0.500                              | 1.224                                       | No      |
| Pattemore 2018 | Prospective cohort   | Asthma         | Both | 0 - 0   | Home              | Maternal                     | Never smokers  | -0.635          | 0.502                              | 1.229                                       | No      |
| Pattemore 2018 | Prospective cohort   | Asthma         | Both | 0 - 0   | Home              | Maternal                     | Never smokers  | -0.041          | 0.515                              | 1.263                                       | No      |
| Pokharel 2001  | Case-control         | Asthma         | Both | 11 - 15 | Home              | Family (anyone in household) | Unknown        | 1.203           | 0.362                              | 0.362                                       | Yes     |
| Pokharel 2007  | Case-control         | Asthma         | Both | 11 - 15 | Home              | Family (anyone in household) | Unknown        | 1.203           | 0.359                              | 0.359                                       | Yes     |
| Polk 2004      | Prospective cohort   | Asthma         | Both | 0 - 4   | Home              | Maternal                     | Never smokers  | 0.157           | 0.061                              | 0.122                                       | No      |
| Polk 2004      | Prospective cohort   | Asthma         | Both | 0 - 4   | Home              | Maternal                     | Never smokers  | 0.307           | 0.062                              | 0.123                                       | No      |
| Polk 2004      | Prospective cohort   | Asthma         | Both | 0 - 4   | Home              | Maternal                     | Never smokers  | 0.300           | 0.064                              | 0.128                                       | No      |
| Polk 2004      | Prospective cohort   | Asthma         | Both | 0 - 4   | Home              | Maternal                     | Never smokers  | 0.215           | 0.070                              | 0.140                                       | No      |
| Polosa 2005    | Retrospective cohort | Asthma         | Both | 18 - 40 | Home              | Parental                     | Unknown        | 0.278           | 0.206                              | 0.206                                       | No      |

**Table S8. Summary of data inputs for asthma**

| Author        | Study design       | Health outcome | Sex  | Age    | Exposure location | Exposure source              | Smoking status     | Log effect size | Original SE of the log effect size | SE of the log effect size used in the model | Outlier |
|---------------|--------------------|----------------|------|--------|-------------------|------------------------------|--------------------|-----------------|------------------------------------|---------------------------------------------|---------|
| Ponsonby 2000 | Prospective cohort | Asthma         | Both | 0 - 0  | Home              | Family (anyone in household) | Never smokers      | 0.030           | 0.106                              | 0.106                                       | No      |
| Ratageri 2000 | Case-control       | Asthma         | Both | 5 - 15 | Home              | Family (anyone in household) | Any smoking status | -0.128          | 0.364                              | 0.515                                       | No      |
| Ratageri 2000 | Case-control       | Asthma         | Both | 5 - 15 | Home              | Family (anyone in household) | Any smoking status | 0.270           | 0.365                              | 0.517                                       | No      |
| Rennie 2008   | Case-control       | Asthma         | Both | 6 - 13 | Home              | Any                          | Adj never smokers  | 0.191           | 0.355                              | 0.355                                       | No      |
| Rosa 2011     | Prospective cohort | Asthma         | Both | 0 - 0  | Home              | Family (anyone in household) | Never smokers      | -0.020          | 0.318                              | 0.318                                       | No      |
| Schroer 2009  | Prospective cohort | Asthma         | Both | 0 - 0  | Home              | Family (anyone in household) | Never smokers      | 0.548           | 0.227                              | 0.321                                       | No      |
| Schroer 2009  | Prospective cohort | Asthma         | Both | 0 - 0  | Home              | Family (anyone in household) | Never smokers      | 0.642           | 0.264                              | 0.373                                       | No      |
| Sears 2002    | Prospective cohort | Asthma         | Both | 0 - 0  | Home              | Paternal                     | Adj never smokers  | 0.470           | 0.278                              | 0.278                                       | No      |
| Selby 2018    | Prospective cohort | Asthma         | Both | 0 - 0  | Home              | Maternal                     | Never smokers      | 0.482           | 0.203                              | 0.288                                       | No      |
| Selby 2018    | Prospective cohort | Asthma         | Both | 0 - 0  | Home              | Other family (not spouse)    | Never smokers      | 0.223           | 0.198                              | 0.281                                       | No      |

**Table S8. Summary of data inputs for asthma**

| Author         | Study design         | Health outcome | Sex  | Age    | Exposure location | Exposure source              | Smoking status    | Log effect size | Original SE of the log effect size | SE of the log effect size used in the model | Outlier |
|----------------|----------------------|----------------|------|--------|-------------------|------------------------------|-------------------|-----------------|------------------------------------|---------------------------------------------|---------|
| Sherman 1990   | Prospective cohort   | Asthma         | Both | 5 - 9  | Home              | Maternal                     | Adj never smokers | 0.166           | 0.224                              | 0.317                                       | No      |
| Sherman 1990   | Prospective cohort   | Asthma         | Both | 5 - 9  | Home              | Paternal                     | Adj never smokers | 0.131           | 0.302                              | 0.427                                       | No      |
| Slob 2020      | Retrospective cohort | Asthma         | Both | 3 - 3  | Home              | Maternal                     | Never smokers     | 0.117           | 0.030                              | 0.042                                       | No      |
| Slob 2020      | Retrospective cohort | Asthma         | Both | 3 - 3  | Home              | Paternal                     | Never smokers     | 0.084           | 0.028                              | 0.040                                       | No      |
| Snodgrass 2016 | Prospective cohort   | Asthma         | Both | 0 - 0  | Home              | Family (anyone in household) | Never smokers     | 0.536           | 0.108                              | 0.108                                       | Yes     |
| Strachan 1996  | Prospective cohort   | Asthma         | Both | 0 - 0  | Home              | Paternal                     | Adj never smokers | -0.083          | 0.116                              | 0.164                                       | No      |
| Strachan 1996  | Prospective cohort   | Asthma         | Both | 0 - 0  | Home              | Maternal                     | Adj never smokers | 0.174           | 0.166                              | 0.235                                       | No      |
| Sun 2015       | Prospective cohort   | Asthma         | Both | 0 - 0  | Home              | Parental                     | Never smokers     | -0.117          | 0.359                              | 0.359                                       | No      |
| Surdu 2006     | Case-control         | Asthma         | Both | 2 - 14 | Home              | Family (anyone in household) | Adj never smokers | 0.399           | 0.535                              | 0.535                                       | No      |
| Tadaki 2009    | Prospective cohort   | Asthma         | Both | 0 - 0  | Home              | Any                          | Never smokers     | 0.039           | 0.450                              | 0.450                                       | No      |
| Takemura 2001  | Case-control         | Asthma         | Both | 6 - 15 | Home              | Parental                     | Unknown           | -0.051          | 0.043                              | 0.043                                       | Yes     |

**Table S8. Summary of data inputs for asthma**

| Author       | Study design        | Health outcome | Sex  | Age           | Exposure location | Exposure source              | Smoking status | Log effect size | Original SE of the log effect size | SE of the log effect size used in the model | Outlier |
|--------------|---------------------|----------------|------|---------------|-------------------|------------------------------|----------------|-----------------|------------------------------------|---------------------------------------------|---------|
| Tanaka 2008  | Prospective cohort  | Asthma         | Both | 0 - 0         | Home              | Family (anyone in household) | Never smokers  | -0.288          | 0.448                              | 0.448                                       | No      |
| Tanaka 2017  | Prospective cohort  | Asthma         | Both | 0 - 0         | Home              | Family (anyone in household) | Never smokers  | 0.157           | 0.129                              | 0.129                                       | No      |
| Taveras 2006 | Prospective cohort  | Asthma         | Both | 0 - 0         | Home              | Maternal                     | Never smokers  | 0.039           | 0.051                              | 0.051                                       | No      |
| Thacher 2014 | Prospective cohort  | Asthma         | Both | 0.167 - 0.167 | Home              | Parental                     | Never smokers  | 0.095           | 0.144                              | 0.144                                       | No      |
| Thacher 2018 | Prospective cohort  | Asthma         | Both | 0 - 0         | Home              | Family (anyone in household) | Never smokers  | 0.049           | 0.078                              | 0.078                                       | No      |
| Thorn 2001   | Nested case-control | Asthma         | Both | 20 - 50       | Home              | Family (anyone in household) | Never smokers  | 0.875           | 0.274                              | 0.274                                       | No      |
| Toizumi 2019 | Prospective cohort  | Asthma         | Both | 0 - 0         | Home              | Family (anyone in household) | Never smokers  | -0.117          | 0.274                              | 0.274                                       | No      |
| Usemann 2018 | Prospective cohort  | Asthma         | Both | 0 - 0         | Home              | Parental                     | Never smokers  | 0.223           | 0.446                              | 0.446                                       | No      |
| Valk 2012    | Prospective cohort  | Asthma         | Both | 0 - 0         | Home              | Family (anyone in household) | Never smokers  | 0.198           | 0.196                              | 0.277                                       | No      |
| Valk 2012    | Prospective cohort  | Asthma         | Both | 0 - 0         | Home              | Family (anyone in household) | Never smokers  | -0.092          | 0.122                              | 0.173                                       | No      |

**Table S8. Summary of data inputs for asthma**

| Author       | Study design       | Health outcome | Sex  | Age     | Exposure location | Exposure source              | Smoking status     | Log effect size | Original SE of the log effect size | SE of the log effect size used in the model | Outlier |
|--------------|--------------------|----------------|------|---------|-------------------|------------------------------|--------------------|-----------------|------------------------------------|---------------------------------------------|---------|
| Vázquez 2006 | Case-control       | Asthma         | Both | 13 - 18 | Home              | Family (anyone in household) | Any smoking status | 0.425           | 0.133                              | 0.133                                       | No      |
| Wada 2021    | Prospective cohort | Asthma         | Both | 0 - 0   | Home              | Family (anyone in household) | Never smokers      | 0.149           | 0.145                              | 0.145                                       | No      |
| Wang 2021    | Prospective cohort | Asthma         | Both | 27 - 55 | Home              | Family (anyone in household) | Never smokers      | -0.223          | 0.168                              | 0.237                                       | No      |
| Wang 2021    | Prospective cohort | Asthma         | Both | 27 - 55 | Home              | Family (anyone in household) | Never smokers      | -0.198          | 0.161                              | 0.228                                       | No      |
| Werff 2013   | Prospective cohort | Asthma         | Both | 4 - 14  | Home              | Family (anyone in household) | Never smokers      | 0.239           | 0.398                              | 0.398                                       | No      |
| Willers 1991 | Case-control       | Asthma         | Both | 3 - 15  | Home              | Parental                     | Unknown            | 0.685           | 0.441                              | 0.441                                       | No      |
| Yang 1998    | Case-control       | Asthma         | Both | 3 - 15  | Home              | Family (anyone in household) | Never smokers      | -0.186          | 0.303                              | 0.303                                       | No      |
| Yang 1998    | Case-control       | Asthma         | Both | 6 - 12  | Home              | Parental                     | Never smokers      | -0.186          | 0.218                              | 0.218                                       | No      |
| Youssef 2018 | Case-control       | Asthma         | Both | 3 - 8   | Home              | Family (anyone in household) | Never smokers      | 1.883           | 0.955                              | 0.955                                       | No      |
| Zeida 2003   | Prospective cohort | Asthma         | Both | 7 - 9   | Home              | Parental                     | Adj never smokers  | 0.846           | 0.596                              | 0.596                                       | No      |



**Table S8. Summary of data inputs for asthma**

| Author     | Study design | Health outcome | Sex  | Age    | Exposure location | Exposure source              | Smoking status    | Log effect size | Original SE of the log effect size | SE of the log effect size used in the model | Outlier |
|------------|--------------|----------------|------|--------|-------------------|------------------------------|-------------------|-----------------|------------------------------------|---------------------------------------------|---------|
| Zheng 2002 | Case-control | Asthma         | Both | 6 - 10 | Home              | Family (anyone in household) | Adj never smokers | 0.336           | 0.139                              | 0.139                                       | No      |

**Table S9. Summary of data inputs for lower respiratory infections**

| Author         | Study design       | Health outcome               | Sex  | Age       | Exposure location | Exposure source              | Smoking status | Log effect size | Original SE of the log effect size | SE of the log effect size used in the model | Outlier |
|----------------|--------------------|------------------------------|------|-----------|-------------------|------------------------------|----------------|-----------------|------------------------------------|---------------------------------------------|---------|
| Almirall 2014  | Case-control       | Lower respiratory infections | Both | 14 - 100  | Home              | Family (anyone in household) | Never smokers  | 0.166           | 0.142                              | 0.142                                       | No      |
| Arlington 2019 | Prospective cohort | Lower respiratory infections | Both | 0 - 0     | Home              | Family (anyone in household) | Never smokers  | 0.262           | 0.150                              | 0.150                                       | No      |
| Baker 2006     | Prospective cohort | Lower respiratory infections | Both | 0 - 0     | Home              | Other family (not spouse)    | Never smokers  | 0.255           | 0.125                              | 0.125                                       | No      |
| Barsam 2013    | Case-control       | Lower respiratory infections | Both | 0.5 - 13  | Home              | Family (anyone in household) | Never smokers  | 0.400           | 0.276                              | 0.276                                       | No      |
| Behrooz 2018   | Case-control       | Lower respiratory infections | Both | 0 - 0.999 | Home              | Family (anyone in household) | Never smokers  | 1.433           | 0.261                              | 0.261                                       | Yes     |
| Bermúdez 2021  | Prospective cohort | Lower respiratory infections | Both | 0 - 0     | Home              | Parental                     | Never smokers  | 0.329           | 0.436                              | 0.436                                       | No      |
| Broor 2001     | Case-control       | Lower respiratory infections | Both | 0 - 4     | Home              | Paternal                     | Never smokers  | 0.215           | 0.206                              | 0.291                                       | No      |
| Broor 2001     | Case-control       | Lower respiratory infections | Both | 0 - 4     | Home              | Other family (not spouse)    | Never smokers  | -1.715          | 1.244                              | 1.759                                       | No      |
| Broughton 2005 | Prospective cohort | Lower respiratory infections | Both | 0 - 0     | Home              | Parental                     | Never smokers  | 0.560           | 0.544                              | 0.544                                       | No      |

**Table S9. Summary of data inputs for lower respiratory infections**

| Author         | Study design       | Health outcome               | Sex  | Age      | Exposure location | Exposure source              | Smoking status                 | Log effect size | Original SE of the log effect size | SE of the log effect size used in the model | Outlier |
|----------------|--------------------|------------------------------|------|----------|-------------------|------------------------------|--------------------------------|-----------------|------------------------------------|---------------------------------------------|---------|
| Charoencá 2013 | Case-control       | Lower respiratory infections | Both | 0.08 - 4 | Home              | Parental                     | Never smokers                  | 1.340           | 0.222                              | 0.222                                       | Yes     |
| Colley 1974    | Prospective cohort | Lower respiratory infections | Both | 0 - 0    | Home              | Parental                     | Never smokers                  | 0.381           | 0.214                              | 0.303                                       | No      |
| Colley 1974    | Prospective cohort | Lower respiratory infections | Both | 0 - 0    | Home              | Parental                     | Never smokers                  | 0.813           | 0.204                              | 0.288                                       | No      |
| Dina 2021      | Case-control       | Lower respiratory infections | Both | 1 - 5    | Home              | Family (anyone in household) | Never smokers                  | 1.483           | 0.487                              | 0.487                                       | Yes     |
| Duijts 2008    | Prospective cohort | Lower respiratory infections | Both | 0 - 0    | Home              | Maternal                     | Never smokers                  | 0.344           | 0.187                              | 0.187                                       | No      |
| Dwedár 2018    | Case-control       | Lower respiratory infections | Both | 18 - 99  | Home              | Family (anyone in household) | Non-smokers (former and never) | 0.166           | 0.142                              | 0.142                                       | No      |
| Farr 2000      | Case-control       | Lower respiratory infections | Both | 18 - 75  | Home              | Spouse                       | Non-smokers (former and never) | -0.211          | 0.219                              | 0.310                                       | No      |
| Farr 2000      | Case-control       | Lower respiratory infections | Both | 18 - 75  | Home              | Other family (not spouse)    | Non-smokers (former and never) | 0.086           | 0.193                              | 0.272                                       | No      |
| Farr 2000      | Case-control       | Lower respiratory infections | Both | 15 - 79  | Home              | Family (anyone in household) | Any smoking status             | -0.248          | 0.337                              | 0.337                                       | No      |

**Table S9. Summary of data inputs for lower respiratory infections**

| Author                | Study design       | Health outcome               | Sex  | Age       | Exposure location | Exposure source              | Smoking status | Log effect size | Original SE of the log effect size | SE of the log effect size used in the model | Outlier |
|-----------------------|--------------------|------------------------------|------|-----------|-------------------|------------------------------|----------------|-----------------|------------------------------------|---------------------------------------------|---------|
| Farzana 2017          | Case-control       | Lower respiratory infections | Both | 0.164 - 1 | Home              | Parental                     | Never smokers  | 1.030           | 0.366                              | 0.366                                       | No      |
| Fergusson 1985        | Prospective cohort | Lower respiratory infections | Both | 0 - 0     | Home              | Maternal only                | Never smokers  | 0.505           | 0.163                              | 0.283                                       | No      |
| Fergusson 1985        | Prospective cohort | Lower respiratory infections | Both | 0 - 0     | Home              | Paternal only                | Never smokers  | 0.030           | 0.201                              | 0.349                                       | No      |
| Fergusson 1985        | Prospective cohort | Lower respiratory infections | Both | 0 - 0     | Home              | Parental-both                | Never smokers  | 0.489           | 0.163                              | 0.283                                       | No      |
| Frassanito 2022       | Case-control       | Lower respiratory infections | Both | 0 - 0.999 | Home              | Family (anyone in household) | Never smokers  | 0.742           | 0.203                              | 0.203                                       | No      |
| Fuentes-Leonarte 2015 | Prospective cohort | Lower respiratory infections | Both | 0 - 0     | Home              | Maternal                     | Never smokers  | -0.020          | 0.151                              | 0.214                                       | No      |
| Fuentes-Leonarte 2015 | Prospective cohort | Lower respiratory infections | Both | 0 - 0     | Home              | Paternal                     | Never smokers  | 0.010           | 0.108                              | 0.152                                       | No      |
| Goetghebuer 2004      | Case-control       | Lower respiratory infections | Both | 0 - 1     | Home              | Parental                     | Never smokers  | 0.513           | 0.257                              | 0.257                                       | No      |
| Grant 2012            | Case-control       | Lower respiratory infections | Both | 0 - 4     | Home              | Family (anyone in household) | Never smokers  | -0.151          | 0.154                              | 0.154                                       | No      |

**Table S9. Summary of data inputs for lower respiratory infections**

| Author          | Study design         | Health outcome               | Sex  | Age       | Exposure location | Exposure source              | Smoking status | Log effect size | Original SE of the log effect size | SE of the log effect size used in the model | Outlier |
|-----------------|----------------------|------------------------------|------|-----------|-------------------|------------------------------|----------------|-----------------|------------------------------------|---------------------------------------------|---------|
| Hassan 2001     | Case-control         | Lower respiratory infections | Both | 0.167 - 5 | Home              | Family (anyone in household) | Never smokers  | 0.770           | 0.212                              | 0.212                                       | Yes     |
| Håberg 2007     | Prospective cohort   | Lower respiratory infections | Both | 0 - 0     | Home              | Parental                     | Never smokers  | 0.086           | 0.042                              | 0.042                                       | No      |
| Islam 2021      | Case-control         | Lower respiratory infections | Both | 0.5 - 5   | Home              | Family (anyone in household) | Never smokers  | 0.476           | 0.246                              | 0.246                                       | No      |
| Johnson 1992    | Case-control         | Lower respiratory infections | Both | 0.04 - 4  | Home              | Family (anyone in household) | Never smokers  | 0.405           | 0.406                              | 0.406                                       | No      |
| Keskinoglu 2007 | Case-control         | Lower respiratory infections | Both | 2 - 12    | Home              | Family (anyone in household) | Never smokers  | -0.033          | 0.256                              | 0.256                                       | No      |
| Koch 2003       | Prospective cohort   | Lower respiratory infections | Both | 0.115 - 2 | Home              | Family (anyone in household) | Never smokers  | 0.756           | 0.250                              | 0.250                                       | No      |
| Lanari 2015     | Prospective cohort   | Lower respiratory infections | Both | 0 - 0     | Other             | Family (anyone in household) | Never smokers  | 0.000           | 0.234                              | 0.331                                       | No      |
| Lanari 2015     | Prospective cohort   | Lower respiratory infections | Both | 0 - 0     | Home              | Family (anyone in household) | Never smokers  | -0.105          | 0.397                              | 0.562                                       | No      |
| Liu 2022        | Retrospective cohort | Lower respiratory infections | Both | 3 - 6     | Home              | Family (anyone in household) | Never smokers  | 0.048           | 0.088                              | 0.088                                       | No      |

**Table S9. Summary of data inputs for lower respiratory infections**

| Author           | Study design       | Health outcome               | Sex  | Age           | Exposure location | Exposure source              | Smoking status     | Log effect size | Original SE of the log effect size | SE of the log effect size used in the model | Outlier |
|------------------|--------------------|------------------------------|------|---------------|-------------------|------------------------------|--------------------|-----------------|------------------------------------|---------------------------------------------|---------|
| Liyanage 2021    | Case-control       | Lower respiratory infections | Both | 0.167 - 5.083 | Home              | Family (anyone in household) | Never smokers      | 0.290           | 0.668                              | 0.668                                       | No      |
| Loeb 2009        | Case-control       | Lower respiratory infections | Both | 65 - 99       | Home              | Family (anyone in household) | Any smoking status | 0.567           | 0.262                              | 0.262                                       | No      |
| Marbury 1996     | Prospective cohort | Lower respiratory infections | Both | 0 - 0         | Home              | Maternal                     | Never smokers      | 0.405           | 0.103                              | 0.103                                       | No      |
| McConnochie 1986 | Case-control       | Lower respiratory infections | Both | 0 - 1         | Home              | Family (anyone in household) | Never smokers      | 1.166           | 0.416                              | 0.416                                       | No      |
| Miyahara 2017    | Prospective cohort | Lower respiratory infections | Both | 0 - 0         | Home              | Paternal                     | Never smokers      | 0.565           | 0.180                              | 0.180                                       | No      |
| Nenna 2017       | Case-control       | Lower respiratory infections | Both | 0.5 - 2       | Home              | Family (anyone in household) | Never smokers      | -0.653          | 0.292                              | 0.292                                       | Yes     |
| Nuesslein 1999   | Prospective cohort | Lower respiratory infections | Both | 0 - 0         | Home              | Family (anyone in household) | Never smokers      | 0.077           | 0.941                              | 0.941                                       | No      |
| Pullan 1982      | Case-control       | Lower respiratory infections | Both | 0 - 0.999     | Home              | Maternal                     | Never smokers      | 0.902           | 0.267                              | 0.378                                       | No      |
| Pullan 1982      | Case-control       | Lower respiratory infections | Both | 0 - 0.999     | Home              | Paternal                     | Never smokers      | 0.653           | 0.276                              | 0.390                                       | No      |

**Table S9. Summary of data inputs for lower respiratory infections**

| Author              | Study design       | Health outcome               | Sex  | Age       | Exposure location | Exposure source              | Smoking status | Log effect size | Original SE of the log effect size | SE of the log effect size used in the model | Outlier |
|---------------------|--------------------|------------------------------|------|-----------|-------------------|------------------------------|----------------|-----------------|------------------------------------|---------------------------------------------|---------|
| Ramesh 2012         | Case-control       | Lower respiratory infections | Both | 0.08 - 4  | Other             | Any                          | Never smokers  | 0.451           | 0.391                              | 0.391                                       | No      |
| Robledo-Aceves 2018 | Case-control       | Lower respiratory infections | Both | 0.082 - 1 | Home              | Family (anyone in household) | Never smokers  | 1.253           | 0.289                              | 0.289                                       | Yes     |
| Roda 2011           | Prospective cohort | Lower respiratory infections | Both | 0 - 1     | Home              | Family (anyone in household) | Never smokers  | 0.049           | 0.106                              | 0.106                                       | No      |
| Roux 2015           | Prospective cohort | Lower respiratory infections | Both | 0 - 0     | Home              | Maternal                     | Never smokers  | 0.663           | 0.195                              | 0.195                                       | No      |
| Rylander 1995       | Case-control       | Lower respiratory infections | Both | 0.329 - 1 | Home              | Paternal                     | Never smokers  | 0.531           | 0.384                              | 0.665                                       | No      |
| Rylander 1995       | Case-control       | Lower respiratory infections | Both | 0.329 - 1 | Home              | Maternal                     | Never smokers  | 0.693           | 0.354                              | 0.613                                       | No      |
| Rylander 1995       | Case-control       | Lower respiratory infections | Both | 0.329 - 1 | Home              | Maternal and paternal        | Never smokers  | 0.693           | 0.309                              | 0.536                                       | No      |
| Rylander 1995       | Case-control       | Lower respiratory infections | Both | 1.5 - 4   | Home              | Paternal                     | Never smokers  | 0.095           | 0.439                              | 0.761                                       | No      |
| Rylander 1995       | Case-control       | Lower respiratory infections | Both | 1.5 - 4   | Home              | Maternal                     | Never smokers  | 0.833           | 0.421                              | 0.728                                       | No      |

**Table S9. Summary of data inputs for lower respiratory infections**

| Author              | Study design       | Health outcome               | Sex  | Age       | Exposure location | Exposure source       | Smoking status | Log effect size | Original SE of the log effect size | SE of the log effect size used in the model | Outlier |
|---------------------|--------------------|------------------------------|------|-----------|-------------------|-----------------------|----------------|-----------------|------------------------------------|---------------------------------------------|---------|
| Rylander 1995       | Case-control       | Lower respiratory infections | Both | 1.5 - 4   | Home              | Maternal and paternal | Never smokers  | 0.262           | 0.344                              | 0.596                                       | No      |
| Schulte-Hobein 1992 | Prospective cohort | Lower respiratory infections | Both | 0 - 0     | Home              | Maternal              | Never smokers  | 0.241           | 0.228                              | 0.228                                       | No      |
| Taylor 1987         | Prospective cohort | Lower respiratory infections | Both | 0 - 0     | Home              | Maternal              | Never smokers  | 0.252           | 0.118                              | 0.118                                       | No      |
| Tupasi 1990         | Prospective cohort | Lower respiratory infections | Both | 0 - 4     | Home              | Maternal and paternal | Never smokers  | 0.113           | 0.032                              | 0.032                                       | No      |
| Törmänen 2018       | Case-control       | Lower respiratory infections | Both | 0 - 0.5   | Home              | Maternal              | Never smokers  | 1.591           | 0.468                              | 0.661                                       | No      |
| Törmänen 2018       | Case-control       | Lower respiratory infections | Both | 0 - 0.5   | Home              | Paternal              | Never smokers  | 0.631           | 0.285                              | 0.404                                       | No      |
| Verani 2016         | Case-control       | Lower respiratory infections | Both | 0.153 - 4 | Home              | Parental              | Never smokers  | 1.639           | 0.286                              | 0.286                                       | Yes     |
| Victoria 1994       | Case-control       | Lower respiratory infections | Both | 0 - 1     | Home              | Paternal              | Never smokers  | -0.117          | 0.169                              | 0.292                                       | No      |
| Victoria 1994       | Case-control       | Lower respiratory infections | Both | 0 - 1     | Home              | Maternal              | Never smokers  | 0.020           | 0.193                              | 0.334                                       | No      |



**Table S9. Summary of data inputs for lower respiratory infections**

| Author        | Study design       | Health outcome               | Sex  | Age    | Exposure location | Exposure source              | Smoking status | Log effect size | Original SE of the log effect size | SE of the log effect size used in the model | Outlier |
|---------------|--------------------|------------------------------|------|--------|-------------------|------------------------------|----------------|-----------------|------------------------------------|---------------------------------------------|---------|
| Victoria 1994 | Case-control       | Lower respiratory infections | Both | 0 - 1  | Home              | Maternal and paternal        | Never smokers  | -0.062          | 0.160                              | 0.276                                       | No      |
| Wenten 2005   | Prospective cohort | Lower respiratory infections | Both | 9 - 11 | Home              | Family (anyone in household) | Never smokers  | 0.412           | 0.153                              | 0.153                                       | No      |
| Wright 1991   | Prospective cohort | Lower respiratory infections | Both | 0 - 0  | Home              | Maternal                     | Never smokers  | 0.554           | 0.277                              | 0.277                                       | No      |

**Table S10. Summary of data inputs for chronic obstructive pulmonary disease**

| Author          | Study design       | Health outcome                        | Sex    | Age     | Exposure location | Exposure source              | Smoking status                 | Log effect size | Original SE of the log effect size | SE of the log effect size used in the model | Outlier |
|-----------------|--------------------|---------------------------------------|--------|---------|-------------------|------------------------------|--------------------------------|-----------------|------------------------------------|---------------------------------------------|---------|
| Behrendt 2005   | Case-control       | Chronic obstructive pulmonary disease | Both   | 18 - 80 | Home              | Family (anyone in household) | Non-smokers (former and never) | -0.580          | 0.241                              | 0.341                                       | Yes     |
| Behrendt 2005   | Case-control       | Chronic obstructive pulmonary disease | Both   | 18 - 80 | Work              | Any                          | Non-smokers (former and never) | -1.347          | 0.594                              | 0.840                                       | Yes     |
| Chan-Yeung 2007 | Case-control       | Chronic obstructive pulmonary disease | Both   | 18 - 99 | Home or work      | Any                          | Any smoking status             | 0.916           | 0.494                              | 0.494                                       | No      |
| Chen 2013       | Case-control       | Chronic obstructive pulmonary disease | Both   | 27 - 85 | Other             | Any                          | Any smoking status             | 0.429           | 0.189                              | 0.189                                       | No      |
| David 2005      | Prospective cohort | Chronic obstructive pulmonary disease | Both   | 45 - 74 | Home              | Family (anyone in household) | Never smokers                  | 0.833           | 0.269                              | 0.381                                       | No      |
| David 2005      | Prospective cohort | Chronic obstructive pulmonary disease | Both   | 45 - 74 | Work              | Any                          | Never smokers                  | 0.412           | 0.185                              | 0.262                                       | No      |
| Dennis 1996     | Case-control       | Chronic obstructive pulmonary disease | Female | 35 - 99 | Home              | Spouse                       | Any smoking status             | 0.713           | 0.323                              | 0.323                                       | No      |

**Table S10. Summary of data inputs for chronic obstructive pulmonary disease**

| Author       | Study design       | Health outcome                        | Sex    | Age         | Exposure location | Exposure source              | Smoking status     | Log effect size | Original SE of the log effect size | SE of the log effect size used in the model | Outlier |
|--------------|--------------------|---------------------------------------|--------|-------------|-------------------|------------------------------|--------------------|-----------------|------------------------------------|---------------------------------------------|---------|
| Ding 2015    | Case-control       | Chronic obstructive pulmonary disease | Both   | 32 - 98     | Other             | Any                          | Any smoking status | 0.495           | 0.231                              | 0.231                                       | No      |
| Diver 2018   | Prospective cohort | Chronic obstructive pulmonary disease | Both   | 50 - 74     | Home              | Family (anyone in household) | Never smokers      | -0.010          | 0.311                              | 0.311                                       | No      |
| Enstrom 2003 | Prospective cohort | Chronic obstructive pulmonary disease | Male   | 30 - 96     | Home              | Spouse                       | Never smokers      | 0.247           | 0.293                              | 0.293                                       | No      |
| Enstrom 2003 | Prospective cohort | Chronic obstructive pulmonary disease | Female | 30 - 96     | Home              | Spouse                       | Never smokers      | 0.113           | 0.211                              | 0.211                                       | No      |
| Gerbase 2006 | Prospective cohort | Chronic obstructive pulmonary disease | Both   | 18 - 60     | Other             | Any                          | Never smokers      | -0.236          | 0.331                              | 0.331                                       | No      |
| He 2012      | Prospective cohort | Chronic obstructive pulmonary disease | Both   | 51.5 - 87.8 | Home or work      | Any                          | Never smokers      | 0.833           | 0.396                              | 0.396                                       | No      |
| Huang 2019   | Case-control       | Chronic obstructive pulmonary disease | Both   | 18 - 99     | Other             | Any                          | Never smokers      | -0.010          | 0.148                              | 0.148                                       | No      |

**Table S10. Summary of data inputs for chronic obstructive pulmonary disease**

| Author            | Study design       | Health outcome                        | Sex    | Age     | Exposure location | Exposure source              | Smoking status     | Log effect size | Original SE of the log effect size | SE of the log effect size used in the model | Outlier |
|-------------------|--------------------|---------------------------------------|--------|---------|-------------------|------------------------------|--------------------|-----------------|------------------------------------|---------------------------------------------|---------|
| Johannesse n 2012 | Case-control       | Chronic obstructive pulmonary disease | Female | 40 - 79 | Work              | Any                          | Any smoking status | 0.329           | 0.453                              | 0.453                                       | No      |
| Johannesse n 2012 | Case-control       | Chronic obstructive pulmonary disease | Male   | 40 - 79 | Home              | Family (anyone in household) | Any smoking status | -0.051          | 0.220                              | 0.311                                       | No      |
| Johannesse n 2012 | Case-control       | Chronic obstructive pulmonary disease | Male   | 40 - 79 | Work              | Any                          | Any smoking status | -0.083          | 0.223                              | 0.316                                       | No      |
| Lee 1986          | Case-control       | Chronic obstructive pulmonary disease | Both   | 35 - 74 | Home              | Spouse                       | Never smokers      | -0.237          | 0.405                              | 0.405                                       | No      |
| McGhee 2005       | Case-control       | Chronic obstructive pulmonary disease | Both   | 60 - 99 | Home              | Family (anyone in household) | Never smokers      | 0.688           | 0.226                              | 0.226                                       | No      |
| Pahwa 2019        | Prospective cohort | Chronic obstructive pulmonary disease | Both   | 18 - 99 | Home              | Family (anyone in household) | Any smoking status | -0.968          | 0.628                              | 0.628                                       | No      |
| Salama 2020       | Case-control       | Chronic obstructive pulmonary disease | Both   | 19 - 99 | Other             | Any                          | Any smoking status | 0.470           | 0.603                              | 0.603                                       | No      |

**Table S10. Summary of data inputs for chronic obstructive pulmonary disease**

| Author       | Study design        | Health outcome                        | Sex    | Age     | Exposure location | Exposure source              | Smoking status                 | Log effect size | Original SE of the log effect size | SE of the log effect size used in the model | Outlier |
|--------------|---------------------|---------------------------------------|--------|---------|-------------------|------------------------------|--------------------------------|-----------------|------------------------------------|---------------------------------------------|---------|
| Salameh 2012 | Case-control        | Chronic obstructive pulmonary disease | Both   | 40 - 99 | Work              | Any                          | Any smoking status             | 0.637           | 0.263                              | 0.372                                       | No      |
| Salameh 2012 | Case-control        | Chronic obstructive pulmonary disease | Both   | 40 - 99 | Home              | Family (anyone in household) | Any smoking status             | 0.940           | 0.201                              | 0.284                                       | No      |
| Sandler 1989 | Prospective cohort  | Chronic obstructive pulmonary disease | Male   | 25 - 99 | Home              | Family (anyone in household) | Never smokers                  | -0.073          | 0.894                              | 0.894                                       | No      |
| Sandler 1989 | Prospective cohort  | Chronic obstructive pulmonary disease | Female | 25 - 99 | Home              | Family (anyone in household) | Never smokers                  | 1.732           | 0.795                              | 0.795                                       | No      |
| Vineis 2005  | Nested case-control | Chronic obstructive pulmonary disease | Both   | 35 - 74 | Home or work      | Any                          | Non-smokers (former and never) | 0.776           | 0.603                              | 0.603                                       | No      |
| Wu 2010      | Case-control        | Chronic obstructive pulmonary disease | Female | 40 - 99 | Home or work      | Any                          | Non-smokers (former and never) | 0.565           | 0.259                              | 0.367                                       | No      |
| Wu 2010      | Case-control        | Chronic obstructive pulmonary disease | Female | 40 - 99 | Home or work      | Any                          | Non-smokers (former and never) | 1.345           | 0.411                              | 0.581                                       | No      |

**Table S10. Summary of data inputs for chronic obstructive pulmonary disease**

| Author  | Study design        | Health outcome                        | Sex  | Age     | Exposure location | Exposure source | Smoking status     | Log effect size | Original SE of the log effect size | SE of the log effect size used in the model | Outlier |
|---------|---------------------|---------------------------------------|------|---------|-------------------|-----------------|--------------------|-----------------|------------------------------------|---------------------------------------------|---------|
| Xu 2007 | Nested case-control | Chronic obstructive pulmonary disease | Both | 35 - 99 | Other             | Any             | Any smoking status | -0.174          | 0.086                              | 0.086                                       | Yes     |

**Table S12. Summary of data inputs for type 2 diabetes mellitus**

| Author         | Study design         | Health outcome           | Sex    | Age     | Exposure location | Exposure source              | Smoking status                 | Log effect size | Original SE of the log effect size | SE of the log effect size used in the model | Outlier |
|----------------|----------------------|--------------------------|--------|---------|-------------------|------------------------------|--------------------------------|-----------------|------------------------------------|---------------------------------------------|---------|
| Hayashino 2008 | Prospective cohort   | Diabetes mellitus type 2 | Both   | 19 - 69 | Work              | Any                          | Non-smokers (former and never) | 0.593           | 0.281                              | 0.397                                       | No      |
| Hayashino 2008 | Prospective cohort   | Diabetes mellitus type 2 | Both   | 19 - 69 | Home              | Family (anyone in household) | Non-smokers (former and never) | -0.223          | 0.284                              | 0.402                                       | No      |
| Huang 2020     | Prospective cohort   | Diabetes mellitus type 2 | Female | 30 - 79 | Other             | Any                          | Never smokers                  | 0.157           | 0.080                              | 0.080                                       | No      |
| Jiang 2019     | Prospective cohort   | Diabetes mellitus type 2 | Female | 20 - 79 | Home              | Family (anyone in household) | Never smokers                  | 0.086           | 0.072                              | 0.102                                       | No      |
| Jiang 2019     | Prospective cohort   | Diabetes mellitus type 2 | Female | 20 - 79 | Home              | Family (anyone in household) | Never smokers                  | 0.223           | 0.061                              | 0.086                                       | No      |
| Kim 2021       | Retrospective cohort | Diabetes mellitus type 2 | Both   | 18 - 99 | Home or work      | Any                          | Never smokers                  | 0.174           | 0.060                              | 0.060                                       | No      |
| Kowall 2010    | Prospective cohort   | Diabetes mellitus type 2 | Both   | 55 - 74 | Home or work      | Any                          | Never smokers                  | 0.875           | 0.454                              | 0.454                                       | No      |
| Kowall 2010    | Prospective cohort   | Diabetes mellitus type 2 | Both   | 55 - 74 | Home or work      | Any                          | Former smokers                 | 0.956           | 0.492                              | 0.492                                       | No      |
| Oba 2020       | Prospective cohort   | Diabetes mellitus type 2 | Female | 40 - 69 | Home              | Spouse                       | Never smokers                  | 0.030           | 0.095                              | 0.095                                       | No      |
| Rias 2020      | Case-control         | Diabetes mellitus type 2 | Both   | 18 - 75 | Other             | Any                          | Never smokers                  | 0.990           | 0.486                              | 0.486                                       | Yes     |
| Zeng 2022      | Case-control         | Diabetes mellitus type 2 | Female | 25 - 95 | Other             | Any                          | Non-smokers (former and never) | -0.673          | 0.328                              | 0.328                                       | Yes     |

**Table S12. Summary of data inputs for type 2 diabetes mellitus**

| Author     | Study design       | Health outcome           | Sex    | Age     | Exposure location | Exposure source | Smoking status | Log effect size | Original SE of the log effect size | SE of the log effect size used in the model | Outlier |
|------------|--------------------|--------------------------|--------|---------|-------------------|-----------------|----------------|-----------------|------------------------------------|---------------------------------------------|---------|
| Zhang 2011 | Prospective cohort | Diabetes mellitus type 2 | Female | 41 - 55 | Other             | Any             | Never smokers  | 0.095           | 0.069                              | 0.097                                       | No      |
| Zhang 2011 | Prospective cohort | Diabetes mellitus type 2 | Female | 41 - 55 | Other             | Any             | Never smokers  | 0.148           | 0.077                              | 0.108                                       | No      |



**Table S12. Summary of data inputs for otitis media**

| Author              | Study design       | Health outcome | Sex  | Age         | Exposure location | Exposure source              | Smoking status | Log effect size | Original SE of the log effect size | SE of the log effect size used in the model | Outlier |
|---------------------|--------------------|----------------|------|-------------|-------------------|------------------------------|----------------|-----------------|------------------------------------|---------------------------------------------|---------|
| Adair-Bischoff 1998 | Case-control       | Otitis media   | Both | 0 - 3.083   | Home              | Family (anyone in household) | Never smokers  | 0.104           | 0.178                              | 0.178                                       | No      |
| Alho 1993           | Prospective cohort | Otitis media   | Both | 0.08 - 0.08 | Home              | Parental                     | Never smokers  | 0.157           | 0.052                              | 0.052                                       | No      |
| Bentdal 2007        | Prospective cohort | Otitis media   | Both | 0 - 0       | Home              | Parental                     | Never smokers  | 0.262           | 0.120                              | 0.120                                       | No      |
| Clamp 2020          | Prospective cohort | Otitis media   | Both | 1 - 1       | Home              | Family (anyone in household) | Never smokers  | 0.095           | 0.094                              | 0.094                                       | No      |
| Collet 1995         | Prospective cohort | Otitis media   | Both | 0 - 0       | Home              | Maternal                     | Never smokers  | 0.262           | 0.150                              | 0.150                                       | No      |
| Costa 2004          | Case-control       | Otitis media   | Both | 0.5 - 5     | Home              | Family (anyone in household) | Never smokers  | 0.412           | 0.057                              | 0.057                                       | Yes     |
| Daigler 1991        | Case-control       | Otitis media   | Both | 0 - 21      | Home              | Maternal                     | Never smokers  | -0.102          | 0.245                              | 0.347                                       | No      |
| Daigler 1991        | Case-control       | Otitis media   | Both | 0 - 21      | Home              | Paternal                     | Never smokers  | -0.182          | 0.246                              | 0.348                                       | No      |
| Daly 1999           | Prospective cohort | Otitis media   | Both | 0 - 0       | Home              | Parental                     | Never smokers  | 0.262           | 0.150                              | 0.150                                       | No      |
| Daly 2007           | Prospective cohort | Otitis media   | Both | 0 - 0       | Home              | Family (anyone in household) | Never smokers  | -0.051          | 0.130                              | 0.130                                       | No      |
| Ey 1995             | Prospective cohort | Otitis media   | Both | 0 - 0       | Home              | Maternal                     | Never smokers  | 0.231           | 0.161                              | 0.161                                       | No      |

**Table S12. Summary of data inputs for otitis media**

| Author                | Study design       | Health outcome | Sex  | Age     | Exposure location | Exposure source              | Smoking status | Log effect size | Original SE of the log effect size | SE of the log effect size used in the model | Outlier |
|-----------------------|--------------------|----------------|------|---------|-------------------|------------------------------|----------------|-----------------|------------------------------------|---------------------------------------------|---------|
| Fuentes-Leonarte 2015 | Prospective cohort | Otitis media   | Both | 0 - 0   | Home              | Maternal                     | Never smokers  | 0.157           | 0.151                              | 0.213                                       | No      |
| Fuentes-Leonarte 2015 | Prospective cohort | Otitis media   | Both | 0 - 0   | Home              | Paternal                     | Never smokers  | 0.223           | 0.108                              | 0.152                                       | No      |
| Håberg 2010           | Prospective cohort | Otitis media   | Both | 0 - 0.5 | Home              | Parental                     | Never smokers  | 0.010           | 0.073                              | 0.103                                       | No      |
| Håberg 2010           | Prospective cohort | Otitis media   | Both | 0 - 0.5 | Home              | Parental                     | Never smokers  | 0.174           | 0.089                              | 0.127                                       | No      |
| Håberg 2010           | Prospective cohort | Otitis media   | Both | 0.5 - 1 | Home              | Parental                     | Never smokers  | 0.039           | 0.037                              | 0.052                                       | No      |
| Håberg 2010           | Prospective cohort | Otitis media   | Both | 0.5 - 1 | Home              | Parental                     | Never smokers  | 0.077           | 0.045                              | 0.063                                       | No      |
| Håberg 2010           | Prospective cohort | Otitis media   | Both | 1 - 1.5 | Home              | Parental                     | Never smokers  | 0.000           | 0.031                              | 0.043                                       | No      |
| Håberg 2010           | Prospective cohort | Otitis media   | Both | 1 - 1.5 | Home              | Parental                     | Never smokers  | 0.030           | 0.040                              | 0.056                                       | No      |
| Jensen 2013           | Prospective cohort | Otitis media   | Both | 0 - 0   | Home              | Maternal                     | Never smokers  | 0.932           | 0.313                              | 0.313                                       | Yes     |
| Koch 2011             | Prospective cohort | Otitis media   | Both | 0 - 4   | Home              | Family (anyone in household) | Never smokers  | 0.262           | 0.363                              | 0.363                                       | No      |
| Niclasen 2016         | Prospective cohort | Otitis media   | Both | 0 - 0   | Home              | Maternal                     | Never smokers  | 0.048           | 0.022                              | 0.022                                       | No      |

**Table S12. Summary of data inputs for otitis media**

| Author         | Study design       | Health outcome | Sex  | Age           | Exposure location | Exposure source              | Smoking status | Log effect size | Original SE of the log effect size | SE of the log effect size used in the model | Outlier |
|----------------|--------------------|----------------|------|---------------|-------------------|------------------------------|----------------|-----------------|------------------------------------|---------------------------------------------|---------|
| Prins-van 2017 | Prospective cohort | Otitis media   | Both | 0.115 - 0.115 | Other             | Any                          | Never smokers  | 0.457           | 0.311                              | 0.311                                       | No      |
| Pukander 1985  | Case-control       | Otitis media   | Both | 2 - 3         | Home              | Parental                     | Never smokers  | 0.635           | 0.191                              | 0.191                                       | Yes     |
| Samson 2020    | Prospective cohort | Otitis media   | Both | 0 - 0         | Home              | Parental                     | Never smokers  | 1.430           | 0.653                              | 0.653                                       | No      |
| Stenstrom 1993 | Case-control       | Otitis media   | Both | 0 - 4         | Home              | Family (anyone in household) | Never smokers  | 0.986           | 0.381                              | 0.381                                       | Yes     |
| Ståhlberg 1986 | Case-control       | Otitis media   | Both | 0.833 - 3.75  | Home              | Parental-one                 | Never smokers  | 1.065           | 0.308                              | 0.435                                       | No      |
| Ståhlberg 1986 | Case-control       | Otitis media   | Both | 0.833 - 3.75  | Home              | Parental-both                | Never smokers  | 0.914           | 0.354                              | 0.501                                       | No      |
| Tainio 1988    | Prospective cohort | Otitis media   | Both | 0 - 0         | Home              | Parental                     | Never smokers  | 0.531           | 0.229                              | 0.229                                       | No      |
| Teele 1989     | Prospective cohort | Otitis media   | Both | 0 - 0.25      | Home              | Parental                     | Never smokers  | 0.043           | 0.026                              | 0.026                                       | No      |
| Wijayanti 2021 | Case-control       | Otitis media   | Both | 6 - 12        | Home              | Family (anyone in household) | Never smokers  | 0.549           | 0.256                              | 0.256                                       | No      |
| Yang 1999      | Case-control       | Otitis media   | Both | 6 - 12        | Home              | Family (anyone in household) | Never smokers  | 0.049           | 0.209                              | 0.209                                       | No      |

### Section 3: Sensitivity Analyses

We conducted three sensitivity analyses to evaluate the robustness of our primary results with regard to changes in the included data. In the first analysis, we restricted the data to studies with a prospective cohort design, which is considered the gold standard of observational research. In the second one, we subset the data to observations from never-smokers only, removing observations associated with former smokers or those with any or unknown smoking status, in an attempt to further avoid the confounding effect of active smoking. In this analysis, observations that were reclassified as “never-smokers” due to the age of the participants (age < 15) (see Section 2.2), were included in the models. Finally, in the last analysis, we applied both of these restrictions concurrently. Specifically for asthma, we had an additional analysis where we included childhood (age 16 or less) studies only. Each sensitivity analysis with more than 10 observations was conducted with 10% trimming, while models with fewer than 10 observations were conducted without trimming, following the BPRF methodology. All other model parameters remained the same. For more details on each of the studies, see Tables S3-S12. Results from each of the sensitivity analyses are presented in section 3.1 below.

**Table S13. Strength of the evidence for the relationship between secondhand smoking when including prospective cohort studies only**

| Health outcome                        | RR (95% UI without gamma) | RR (95% UI with gamma) | BPRF | ROS   | Star rating | Publication bias | No. of studies | Selected bias covariates                                    | Risk-Outcome pair included in GBD 2021 |
|---------------------------------------|---------------------------|------------------------|------|-------|-------------|------------------|----------------|-------------------------------------------------------------|----------------------------------------|
| Ischemic heart disease                | 1.21 (1.14, 1.28)         | 1.21 (1.03, 1.42)      | 1.06 | 0.03  | ☆☆          | No               | 15             | Baseline exposure assessment; Not representative population | Y                                      |
| Stroke                                | 1.21 (1.12, 1.31)         | 1.21 (0.98, 1.5)       | 1.01 | 0.01  | ☆☆          | No               | 12             | Self-reported outcome                                       | Y                                      |
| Asthma                                | 1.23 (1.18, 1.29)         | 1.23 (0.97, 1.57)      | 1.01 | 0.004 | ☆☆          | No               | 68             | adj_L1; self-reported outcome; children population          | N                                      |
| Otitis media                          | 1.06 (1.03, 1.09)         | 1.06 (0.99, 1.13)      | 1    | 0.002 | ☆☆          | Yes              | 16             | None                                                        | Y                                      |
| Type 2 diabetes mellitus              | 1.14 (1.06, 1.23)         | 1.14 (0.95, 1.38)      | 0.98 | -0.01 | ☆           | No               | 6              | None                                                        | Y                                      |
| Lower respiratory infections          | 1.25 (1.15, 1.36)         | 1.25 (0.89, 1.75)      | 0.94 | -0.03 | ☆           | No               | 21             | None                                                        | Y                                      |
| Tracheal, bronchus, and lung cancer   | 1.29 (1.16, 1.43)         | 1.29 (0.89, 1.86)      | 0.95 | -0.03 | ☆           | No               | 21             | adj_L2                                                      | Y                                      |
| Breast cancer                         | 1.05 (1, 1.1)             | 1.05 (0.92, 1.2)       | N/A  | N/A   |             | No               | 11             | None                                                        | Y                                      |
| Chronic obstructive pulmonary disease | 1.21 (0.93, 1.57)         | 1.21 (0.55, 2.64)      | N/A  | N/A   |             | No               | 7              | None                                                        | Y                                      |

The reported mean relative risk (RR) and its 95% uncertainty interval (UI) reflect the risk an individual who has been exposed to secondhand smoking has of developing the outcome of interest relative to that of someone who has not been exposed to secondhand smoking. Gamma is the estimated between-study heterogeneity. We report the 95% UI when not incorporating between-study heterogeneity – "95% UI without gamma" – and when accounting for between-study heterogeneity – "95% UI with gamma." The Burden of Proof Risk Function (BPRF) is calculated for risk-outcome pairs that were found to have significant relationships at an 0.05 level of significance when not incorporating between-study heterogeneity (i.e., the lower bound of the 95% UI without gamma does not cross the null RR value of one). The BPRF corresponds to the 5th quantile estimate of relative risk accounting for between-study heterogeneity closest to the null for each risk–outcome pair, and it reflects the most conservative estimate of excess risk associated with secondhand smoking that is consistent with the available data. Since we define secondhand smoking exposure as dichotomous risk factors, i.e., an individual either has been exposed or has not, the risk-outcome score (ROS) is calculated as the signed value of  $\log(\text{BPRF})$  divided by two. Negative ROSs indicate that the evidence of the association is very weak and inconsistent. For ease of interpretation, we have transformed the ROS and BPRF into a star rating (1-5) with a higher rating representing a larger effect with stronger evidence. The potential existence of publication bias, which, if present, would affect the validity of the results, was tested using Egger's Regression. Included studies represent all available relevant data identified through our systematic reviews from January 1970 through July 2022. The selected bias covariates were chosen for inclusion in the model using algorithm that systematically detects bias covariates that correspond to significant sources of bias in the observations included. If selected, the observations were adjusted to better reflect the gold standard values of the covariate.

**Table S14. Strength of the evidence for the relationship between secondhand smoking when including observations from never-smokers only**

| Health outcome                        | RR (95% UI without gamma) | RR (95% UI with gamma) | BPRF | ROS   | Star rating | Publication bias | No. of studies | Selected bias covariates                                     | Risk-Outcome pair included in GBD 2021 |
|---------------------------------------|---------------------------|------------------------|------|-------|-------------|------------------|----------------|--------------------------------------------------------------|----------------------------------------|
| Ischemic heart disease                | 1.26 (1.19, 1.33)         | 1.26 (1.05, 1.52)      | 1.08 | 0.04  | ☆☆          | No               | 28             | Baseline exposure assessment; not representative population  | Y                                      |
| Stroke                                | 1.18 (1.12, 1.24)         | 1.18 (1.04, 1.34)      | 1.06 | 0.03  | ☆☆          | No               | 16             | None                                                         | Y                                      |
| Type 2 diabetes mellitus              | 1.16 (1.09, 1.24)         | 1.16 (0.98, 1.37)      | 1.01 | 0.004 | ☆☆          | No               | 7              | None                                                         | Y                                      |
| Tracheal, bronchus, and lung cancer   | 1.24 (1.17, 1.31)         | 1.24 (0.97, 1.6)       | 1    | 0.002 | ☆☆          | No               | 70             | None                                                         | Y                                      |
| Asthma                                | 1.18 (1.14, 1.23)         | 1.18 (0.91, 1.53)      | 0.95 | -0.02 | ☆           | No               | 102            | adj_L1; self-reported outcome; children population           | N                                      |
| Otitis media                          | 1.12 (1.06, 1.18)         | 1.12 (0.92, 1.36)      | 0.95 | -0.03 | ☆           | No               | 24             | Study design (not prospective cohort); self-reported outcome | Y                                      |
| Lower respiratory infections          | 1.43 (1.3, 1.58)          | 1.43 (0.81, 2.54)      | 0.89 | -0.06 | ☆           | No               | 46             | Not representative population; ever SHS exposure             | Y                                      |
| Breast cancer                         | 1.09 (1.03, 1.15)         | 1.09 (0.85, 1.4)       | 0.89 | -0.06 | ☆           | No               | 37             | Study design (not prospective cohort)                        | Y                                      |
| Chronic obstructive pulmonary disease | 1.15 (0.95, 1.4)          | 1.15 (0.65, 2.05)      | N/A  | N/A   |             | No               | 9              | adj_L1, adj_LO                                               | Y                                      |

The reported mean relative risk (RR) and its 95% uncertainty interval (UI) reflect the risk an individual who has been exposed to secondhand smoking has of developing the outcome of interest relative to that of someone who has not been exposed to secondhand smoking. Gamma is the estimated between-study heterogeneity. We report the 95% UI when not incorporating between-study heterogeneity – "95% UI without gamma" – and when accounting for between-study heterogeneity – "95% UI with gamma." The Burden of Proof Risk Function (BPRF) is calculated for risk-outcome pairs that were found to have significant relationships at an 0.05 level of significance when not incorporating between-study heterogeneity (i.e., the lower bound of the 95% UI without gamma does not cross the null RR value of one). The BPRF corresponds to the 5th quantile estimate of relative risk accounting for between-study heterogeneity closest to the null for each risk-outcome pair, and it reflects the most conservative estimate of excess risk associated with secondhand smoking that is consistent with the available data. Since we define secondhand smoking exposure as dichotomous risk factors, i.e., an individual either has been exposed or has not, the risk-outcome score (ROS) is calculated as the signed value of log(BPRF) divided by two. Negative ROSs indicate that the evidence of the association is very weak and inconsistent. For ease of interpretation, we have transformed the ROS and BPRF into a star rating (1-5) with a higher rating representing a larger effect with stronger evidence. The potential existence of publication bias, which, if present, would affect the validity of the results, was tested using Egger's Regression. Included studies represent all available relevant data identified through our systematic reviews from January 1970 through July 2022. The selected bias covariates were chosen for inclusion in the model using algorithm that systematically detects bias covariates that correspond to significant sources of bias in the observations included. If selected, the observations were adjusted to better reflect the gold standard values of the covariate.

**Table S15. Strength of the evidence for the relationship between secondhand smoking when including prospective cohorts and observations from never-smokers only**

| Health outcome                        | RR (95% UI without gamma) | RR (95% UI with gamma) | BPRF | ROS    | Star rating | Publication bias | No. of studies | Selected bias covariates                                    | Risk-Outcome pair included in GBD 2021 |
|---------------------------------------|---------------------------|------------------------|------|--------|-------------|------------------|----------------|-------------------------------------------------------------|----------------------------------------|
| Ischemic heart disease                | 1.23 (1.16, 1.3)          | 1.23 (1.04, 1.45)      | 1.07 | 0.04   | ☆☆          | No               | 14             | Baseline exposure assessment; not representative population | Y                                      |
| Otitis media                          | 1.06 (1.03, 1.09)         | 1.06 (0.99, 1.13)      | 1    | 0.002  | ☆☆          | Yes              | 16             | None                                                        | Y                                      |
| Stroke                                | 1.2 (1.1, 1.3)            | 1.2 (0.96, 1.49)       | 1    | -0.001 | ☆           | No               | 10             | None                                                        | Y                                      |
| Asthma                                | 1.19 (1.14, 1.24)         | 1.19 (0.95, 1.5)       | 0.98 | -0.01  | ☆           | No               | 62             | adj_L1; self-reported outcome; children population          | N                                      |
| Type 2 diabetes mellitus              | 1.14 (1.06, 1.23)         | 1.14 (0.95, 1.38)      | 0.97 | -0.01  | ☆           | No               | 5              | None                                                        | Y                                      |
| Lower respiratory infections          | 1.25 (1.15, 1.36)         | 1.25 (0.89, 1.75)      | 0.94 | -0.03  | ☆           | No               | 21             | None                                                        | Y                                      |
| Tracheal, bronchus, and lung cancer   | 1.13 (1.02, 1.26)         | 1.13 (0.8, 1.61)       | 0.84 | -0.08  | ☆           | No               | 17             | adj_L0                                                      | Y                                      |
| Chronic obstructive pulmonary disease | 1.32 (1.04, 1.68)         | 1.32 (0.67, 2.59)      | 0.75 | -0.14  | ☆           | No               | 6              | None                                                        | Y                                      |
| Breast cancer                         | 1.05 (1, 1.1)             | 1.05 (0.92, 1.2)       | N/A  | N/A    |             | No               | 11             | None                                                        | Y                                      |

The reported mean relative risk (RR) and its 95% uncertainty interval (UI) reflect the risk an individual who has been exposed to secondhand smoking has of developing the outcome of interest relative to that of someone who has not been exposed to secondhand smoking. Gamma is the estimated between-study heterogeneity. We report the 95% UI when not incorporating between-study heterogeneity – "95% UI without gamma" – and when accounting for between-study heterogeneity – "95% UI with gamma." The Burden of Proof Risk Function (BPRF) is calculated for risk-outcome pairs that were found to have significant relationships at an 0.05 level of significance when not incorporating between-study heterogeneity (i.e., the lower bound of the 95% UI without gamma does not cross the null RR value of one). The BPRF corresponds to the 5th quantile estimate of relative risk accounting for between-study heterogeneity closest to the null for each risk–outcome pair, and it reflects the most conservative estimate of excess risk associated with secondhand smoking that is consistent with the available data. Since we define secondhand smoking exposure as dichotomous risk factors, i.e., an individual either has been exposed or has not, the risk-outcome score (ROS) is calculated as the signed value of  $\log(\text{BPRF})$  divided by two. Negative ROSs indicate that the evidence of the association is very weak and inconsistent. For ease of interpretation, we have transformed the ROS and BPRF into a star rating (1-5) with a higher rating representing a larger effect with stronger evidence. The potential existence of publication bias, which, if present, would affect the validity of the results, was tested using Egger's Regression. Included studies represent all available relevant data identified through our systematic reviews from January 1970 through July 2022. The selected bias covariates were chosen for inclusion in the model using algorithm that systematically detects bias covariates that correspond to significant sources of bias in the observations included. If selected, the observations were adjusted to better reflect the gold standard values of the covariate.

**Table S16. Strength of the evidence for the relationship between secondhand smoking and asthma when including data from children aged 16 or less only**

| Health outcome | RR (95% UI without gamma) | RR (95% UI with gamma) | BPRF | ROS   | Star rating | Publication bias | No. of studies | Selected bias covariates | Risk-Outcome pair included in GBD 2021 |
|----------------|---------------------------|------------------------|------|-------|-------------|------------------|----------------|--------------------------|----------------------------------------|
| Asthma         | 1.2 (1.15, 1.25)          | 1.2 (0.91, 1.57)       | 0.95 | -0.02 | ☆           | No               | 96             | Selection bias           | N                                      |

The reported mean relative risk (RR) and its 95% uncertainty interval (UI) reflect the risk an individual who has been exposed to secondhand smoking has of developing the outcome of interest relative to that of someone who has not been exposed to secondhand smoking. Gamma is the estimated between-study heterogeneity. We report the 95% UI when not incorporating between-study heterogeneity – "95% UI without gamma" – and when accounting for between-study heterogeneity – "95% UI with gamma." The Burden of Proof Risk Function (BPRF) is calculated for risk-outcome pairs that were found to have significant relationships at an 0.05 level of significance when not incorporating between-study heterogeneity (i.e., the lower bound of the 95% UI without gamma does not cross the null RR value of one). The BPRF corresponds to the 5th quantile estimate of relative risk accounting for between-study heterogeneity closest to the null for each risk–outcome pair, and it reflects the most conservative estimate of excess risk associated with secondhand smoking that is consistent with the available data. Since we define secondhand smoking exposure as dichotomous risk factors, i.e., an individual either has been exposed or has not, the risk-outcome score (ROS) is calculated as the signed value of  $\log(\text{BPRF})$  divided by two. Negative ROSs indicate that the evidence of the association is very weak and inconsistent. For ease of interpretation, we have transformed the ROS and BPRF into a star rating (1-5) with a higher rating representing a larger effect with stronger evidence. The potential existence of publication bias, which, if present, would affect the validity of the results, was tested using Egger's Regression. Included studies represent all available relevant data identified through our systematic reviews from January 1970 through July 2022. The selected bias covariates were chosen for inclusion in the model using algorithm that systematically detects bias covariates that correspond to significant sources of bias in the observations included. If selected, the observations were adjusted to better reflect the gold standard values of the covariate.



## Section 4: GATHER and PRISMA checklists

### Section 4.1: PRISMA

**Table S17. PRISMA 2020 Abstract Checklist**

| Section and Topic       | Item # | Checklist item                                                                                                                                                                                                                                                                                        | Reported (Yes/No)                                                                                                                                                         |
|-------------------------|--------|-------------------------------------------------------------------------------------------------------------------------------------------------------------------------------------------------------------------------------------------------------------------------------------------------------|---------------------------------------------------------------------------------------------------------------------------------------------------------------------------|
| <b>TITLE</b>            |        |                                                                                                                                                                                                                                                                                                       |                                                                                                                                                                           |
| Title                   | 1      | Identify the report as a systematic review.                                                                                                                                                                                                                                                           | Identified in the abstract but not in the title. The title reflects the review and meta-analysis methodology used.                                                        |
| <b>BACKGROUND</b>       |        |                                                                                                                                                                                                                                                                                                       |                                                                                                                                                                           |
| Objectives              | 2      | Provide an explicit statement of the main objective(s) or question(s) the review addresses.                                                                                                                                                                                                           | Yes                                                                                                                                                                       |
| <b>METHODS</b>          |        |                                                                                                                                                                                                                                                                                                       |                                                                                                                                                                           |
| Eligibility criteria    | 3      | Specify the inclusion and exclusion criteria for the review.                                                                                                                                                                                                                                          | Due to space constrains, information is provided in the main text and supplementary information.                                                                          |
| Information sources     | 4      | Specify the information sources (e.g. databases, registers) used to identify studies and the date when each was last searched.                                                                                                                                                                        | Space limitation required us to describe search details in the main text and supplementary information.                                                                   |
| Risk of bias            | 5      | Specify the methods used to assess risk of bias in the included studies.                                                                                                                                                                                                                              | Yes, briefly as incorporated in the burden of proof meta-analytic approach; More detail provided in the main text and supplementary information.                          |
| Synthesis of results    | 6      | Specify the methods used to present and synthesise results.                                                                                                                                                                                                                                           | Yes, briefly as incorporated in the burden of proof meta-analytic approach; More detail provided in the main text and supplementary information.                          |
| <b>RESULTS</b>          |        |                                                                                                                                                                                                                                                                                                       |                                                                                                                                                                           |
| Included studies        | 7      | Give the total number of included studies and participants and summarise relevant characteristics of studies.                                                                                                                                                                                         | Space limitation required us to describe these details in the main text and supplementary information.                                                                    |
| Synthesis of results    | 8      | Present results for main outcomes, preferably indicating the number of included studies and participants for each. If meta-analysis was done, report the summary estimate and confidence/credible interval. If comparing groups, indicate the direction of the effect (i.e. which group is favoured). | Briefly, interpretation of star rating is reported, which is the culmination of the primary results. Further details and summary estimates are provided in the main text. |
| <b>DISCUSSION</b>       |        |                                                                                                                                                                                                                                                                                                       |                                                                                                                                                                           |
| Limitations of evidence | 9      | Provide a brief summary of the limitations of the evidence included in the review (e.g. study risk of bias, inconsistency and imprecision).                                                                                                                                                           | Not in abstract. Covered in detail in the main text and supplementary information.                                                                                        |
| Interpretation          | 10     | Provide a general interpretation of the results and important implications.                                                                                                                                                                                                                           | Yes                                                                                                                                                                       |
| <b>OTHER</b>            |        |                                                                                                                                                                                                                                                                                                       |                                                                                                                                                                           |
| Funding                 | 11     | Specify the primary source of funding for the review.                                                                                                                                                                                                                                                 | Not in abstract due to space constraints but described in the main text.                                                                                                  |
| Registration            | 12     | Provide the register name and registration number.                                                                                                                                                                                                                                                    | N/A                                                                                                                                                                       |

**Table S18. PRISMA 2020 Manuscript Checklist**

| Section and Topic             | Item # | Checklist item                                                                                                                                                                                                                                                                                       | Location where item is reported                                                                                                       |
|-------------------------------|--------|------------------------------------------------------------------------------------------------------------------------------------------------------------------------------------------------------------------------------------------------------------------------------------------------------|---------------------------------------------------------------------------------------------------------------------------------------|
| <b>TITLE</b>                  |        |                                                                                                                                                                                                                                                                                                      |                                                                                                                                       |
| Title                         | 1      | Identify the report as a systematic review.                                                                                                                                                                                                                                                          | Not in the title due to focus on analytical methodology. Instead, this is explicitly stated in the Methods section of the manuscript. |
| <b>ABSTRACT</b>               |        |                                                                                                                                                                                                                                                                                                      |                                                                                                                                       |
| Abstract                      | 2      | See the PRISMA 2020 for Abstracts checklist.                                                                                                                                                                                                                                                         | Table S17                                                                                                                             |
| <b>INTRODUCTION</b>           |        |                                                                                                                                                                                                                                                                                                      |                                                                                                                                       |
| Rationale                     | 3      | Describe the rationale for the review in the context of existing knowledge.                                                                                                                                                                                                                          | Main - Introduction                                                                                                                   |
| Objectives                    | 4      | Provide an explicit statement of the objective(s) or question(s) the review addresses.                                                                                                                                                                                                               | Main – Introduction                                                                                                                   |
| <b>METHODS</b>                |        |                                                                                                                                                                                                                                                                                                      |                                                                                                                                       |
| Eligibility criteria          | 5      | Specify the inclusion and exclusion criteria for the review and how studies were grouped for the syntheses.                                                                                                                                                                                          | Methods; Supplementary Information section 1.2                                                                                        |
| Information sources           | 6      | Specify all databases, registers, websites, organisations, reference lists and other sources searched or consulted to identify studies. Specify the date when each source was last searched or consulted.                                                                                            | Methods; Results; Supplementary Information section 1                                                                                 |
| Search strategy               | 7      | Present the full search strategies for all databases, registers and websites, including any filters and limits used.                                                                                                                                                                                 | Supplementary information section 1.1                                                                                                 |
| Selection process             | 8      | Specify the methods used to decide whether a study met the inclusion criteria of the review, including how many reviewers screened each record and each report retrieved, whether they worked independently, and if applicable, details of automation tools used in the process.                     | Methods                                                                                                                               |
| Data collection process       | 9      | Specify the methods used to collect data from reports, including how many reviewers collected data from each report, whether they worked independently, any processes for obtaining or confirming data from study investigators, and if applicable, details of automation tools used in the process. | Supplementary information section 1.5                                                                                                 |
| Data items                    | 10a    | List and define all outcomes for which data were sought. Specify whether all results that were compatible with each outcome domain in each study were sought (e.g. for all measures, time points, analyses), and if not, the methods used to decide which results to collect.                        | Methods; Supplementary Information 1.3                                                                                                |
|                               | 10b    | List and define all other variables for which data were sought (e.g. participant and intervention characteristics, funding sources). Describe any assumptions made about any missing or unclear information.                                                                                         | Methods; Supplementary Information table S2-S3                                                                                        |
| Study risk of bias assessment | 11     | Specify the methods used to assess risk of bias in the included studies, including details of the tool(s) used, how many reviewers assessed each study and whether they worked independently, and if applicable, details of automation tools used in the process.                                    | Methods; Supplementary Information section 5                                                                                          |
| Effect measures               | 12     | Specify for each outcome the effect measure(s) (e.g. risk ratio, mean difference) used in the synthesis or presentation of results.                                                                                                                                                                  | Methods                                                                                                                               |
| Synthesis methods             | 13a    | Describe the processes used to decide which studies were eligible for each synthesis (e.g. tabulating the study intervention characteristics and comparing against the planned groups for each synthesis (item #5)).                                                                                 | Methods; Supplementary information section 2                                                                                          |
|                               | 13b    | Describe any methods required to prepare the data for presentation or synthesis, such as handling of missing summary statistics, or data conversions.                                                                                                                                                | Methods; Supplementary information section 2                                                                                          |
|                               | 13c    | Describe any methods used to tabulate or visually display results of individual studies and syntheses.                                                                                                                                                                                               | Captions of figures                                                                                                                   |
|                               | 13d    | Describe any methods used to synthesize results and provide a rationale for the choice(s). If meta-analysis was performed, describe the model(s), method(s) to identify the presence and extent of statistical heterogeneity, and software package(s) used.                                          | Methods overview; Code availability statement.                                                                                        |
|                               | 13e    | Describe any methods used to explore possible causes of heterogeneity among study results (e.g. subgroup analysis, meta-regression).                                                                                                                                                                 | Methods;                                                                                                                              |
|                               | 13f    | Describe any sensitivity analyses conducted to assess robustness of the synthesized results.                                                                                                                                                                                                         | Methods; Supplementary information section 3; Supplementary Tables S13-16.                                                            |
| Reporting bias assessment     | 14     | Describe any methods used to assess risk of bias due to missing results in a synthesis (arising from reporting biases).                                                                                                                                                                              | Methods; Table 2; Supplementary tables S13-16.                                                                                        |

|                                                |     |                                                                                                                                                                                                                                                                                      |                                                                                                                                                                                                                                        |
|------------------------------------------------|-----|--------------------------------------------------------------------------------------------------------------------------------------------------------------------------------------------------------------------------------------------------------------------------------------|----------------------------------------------------------------------------------------------------------------------------------------------------------------------------------------------------------------------------------------|
| Certainty assessment                           | 15  | Describe any methods used to assess certainty (or confidence) in the body of evidence for an outcome.                                                                                                                                                                                | Methods                                                                                                                                                                                                                                |
| <b>RESULTS</b>                                 |     |                                                                                                                                                                                                                                                                                      |                                                                                                                                                                                                                                        |
| Study selection                                | 16a | Describe the results of the search and selection process, from the number of records identified in the search to the number of studies included in the review, ideally using a flow diagram.                                                                                         | PRISMA flow diagrams (Supplementary Information Figs. S1-S9)                                                                                                                                                                           |
|                                                | 16b | Cite studies that might appear to meet the inclusion criteria, but which were excluded, and explain why they were excluded.                                                                                                                                                          | N/A                                                                                                                                                                                                                                    |
| Study characteristics                          | 17  | Cite each included study and present its characteristics.                                                                                                                                                                                                                            | Supplementary Information Table S3                                                                                                                                                                                                     |
| Risk of bias in studies                        | 18  | Present assessments of risk of bias for each included study.                                                                                                                                                                                                                         | Supplementary Information Table S20                                                                                                                                                                                                    |
| Results of individual studies                  | 19  | For all outcomes, present, for each study: (a) summary statistics for each group (where appropriate) and (b) an effect estimate and its precision (e.g. confidence/credible interval), ideally using structured tables or plots.                                                     | Results section; Table 2.                                                                                                                                                                                                              |
| Results of syntheses                           | 20a | For each synthesis, briefly summarise the characteristics and risk of bias among contributing studies.                                                                                                                                                                               | Results section; Table 2.                                                                                                                                                                                                              |
|                                                | 20b | Present results of all statistical syntheses conducted. If meta-analysis was done, present for each the summary estimate and its precision (e.g. confidence/credible interval) and measures of statistical heterogeneity. If comparing groups, describe the direction of the effect. | Results section; Table 2. Between-study heterogeneity (Supplementary Information Table S21)                                                                                                                                            |
|                                                | 20c | Present results of all investigations of possible causes of heterogeneity among study results.                                                                                                                                                                                       | Results section                                                                                                                                                                                                                        |
|                                                | 20d | Present results of all sensitivity analyses conducted to assess the robustness of the synthesized results.                                                                                                                                                                           | Results section; Supplementary information Tables S13-S16.                                                                                                                                                                             |
| Reporting biases                               | 21  | Present assessments of risk of bias due to missing results (arising from reporting biases) for each synthesis assessed.                                                                                                                                                              | Results section; Figures 1-4                                                                                                                                                                                                           |
| Certainty of evidence                          | 22  | Present assessments of certainty (or confidence) in the body of evidence for each outcome assessed.                                                                                                                                                                                  | Results section; Table 2; Figures 1-4                                                                                                                                                                                                  |
| <b>DISCUSSION</b>                              |     |                                                                                                                                                                                                                                                                                      |                                                                                                                                                                                                                                        |
| Discussion                                     | 23a | Provide a general interpretation of the results in the context of other evidence.                                                                                                                                                                                                    | Discussion paragraphs 1-3                                                                                                                                                                                                              |
|                                                | 23b | Discuss any limitations of the evidence included in the review.                                                                                                                                                                                                                      | Discussion paragraph 6                                                                                                                                                                                                                 |
|                                                | 23c | Discuss any limitations of the review processes used.                                                                                                                                                                                                                                | Discussion paragraph 6                                                                                                                                                                                                                 |
|                                                | 23d | Discuss implications of the results for practice, policy, and future research.                                                                                                                                                                                                       | Discussion paragraphs 4-5                                                                                                                                                                                                              |
| <b>OTHER INFORMATION</b>                       |     |                                                                                                                                                                                                                                                                                      |                                                                                                                                                                                                                                        |
| Registration and protocol                      | 24a | Provide registration information for the review, including register name and registration number, or state that the review was not registered.                                                                                                                                       | The entirety of the Global Burden of Diseases, Injuries, and Risk Factors Study has been registered and approved through the UW IRB, as detailed in Methods section (“Overview”). The systematic review was not registered separately. |
|                                                | 24b | Indicate where the review protocol can be accessed, or state that a protocol was not prepared.                                                                                                                                                                                       | N/A                                                                                                                                                                                                                                    |
|                                                | 24c | Describe and explain any amendments to information provided at registration or in the protocol.                                                                                                                                                                                      | N/A                                                                                                                                                                                                                                    |
| Support                                        | 25  | Describe sources of financial or non-financial support for the review, and the role of the funders or sponsors in the review.                                                                                                                                                        | Main text “Acknowledgments”                                                                                                                                                                                                            |
| Competing interests                            | 26  | Declare any competing interests of review authors.                                                                                                                                                                                                                                   | Main text “Competing interests”                                                                                                                                                                                                        |
| Availability of data, code and other materials | 27  | Report which of the following are publicly available and where they can be found: template data collection forms; data extracted from included studies; data used for all analyses; analytic code; any other materials used in the review.                                           | Main text “Data availability” and “Code availability” sections; data collection form template in SI Table S2                                                                                                                           |

Section 4.2: GATHER

**Table S19. GATHER Checklist**

| Item #                                                                                                | Checklist item                                                                                                                                                                                                                                                                                                                                                                            | Reported on page #                                                                                                                                          |
|-------------------------------------------------------------------------------------------------------|-------------------------------------------------------------------------------------------------------------------------------------------------------------------------------------------------------------------------------------------------------------------------------------------------------------------------------------------------------------------------------------------|-------------------------------------------------------------------------------------------------------------------------------------------------------------|
| <b>Objectives and funding</b>                                                                         |                                                                                                                                                                                                                                                                                                                                                                                           |                                                                                                                                                             |
| 1                                                                                                     | Define the indicator(s), populations (including age, sex, and geographic entities), and time period(s) for which estimates were made.                                                                                                                                                                                                                                                     | Methods (18-21)                                                                                                                                             |
| 2                                                                                                     | List the funding sources for the work.                                                                                                                                                                                                                                                                                                                                                    | 72                                                                                                                                                          |
| <b>Data Inputs</b>                                                                                    |                                                                                                                                                                                                                                                                                                                                                                                           |                                                                                                                                                             |
| <i>For all data inputs from multiple sources that are synthesized as part of the study:</i>           |                                                                                                                                                                                                                                                                                                                                                                                           |                                                                                                                                                             |
| 3                                                                                                     | Describe how the data were identified and how the data were accessed.                                                                                                                                                                                                                                                                                                                     | Methods (20-21)                                                                                                                                             |
| 4                                                                                                     | Specify the inclusion and exclusion criteria. Identify all ad-hoc exclusions.                                                                                                                                                                                                                                                                                                             | Methods (20-21); Supplementary Information (14-15)                                                                                                          |
| 5                                                                                                     | Provide information on all included data sources and their main characteristics. For each data source used, report reference information or contact name/institution, population represented, data collection method, year(s) of data collection, sex and age range, diagnostic criteria or measurement method, and sample size, as relevant.                                             | Supplementary Information Table S3 (37-92)                                                                                                                  |
| 6                                                                                                     | Identify and describe any categories of input data that have potentially important biases (e.g., based on characteristics listed in item 5).                                                                                                                                                                                                                                              | Methods (23-24); Supplementary Tables S4-S12                                                                                                                |
| <i>For data inputs that contribute to the analysis but were not synthesized as part of the study:</i> |                                                                                                                                                                                                                                                                                                                                                                                           |                                                                                                                                                             |
| 7                                                                                                     | Describe and give sources for any other data inputs.                                                                                                                                                                                                                                                                                                                                      | NA                                                                                                                                                          |
| <i>For all data inputs:</i>                                                                           |                                                                                                                                                                                                                                                                                                                                                                                           |                                                                                                                                                             |
| 8                                                                                                     | Provide all data inputs in a file format from which data can be efficiently extracted (e.g., a spreadsheet rather than a PDF), including all relevant meta-data listed in item 5. For any data inputs that cannot be shared because of ethical or legal reasons, such as third-party ownership, provide a contact name or the name of the institution that retains the right to the data. | Supplementary Information (95-162)                                                                                                                          |
| <b>Data analysis</b>                                                                                  |                                                                                                                                                                                                                                                                                                                                                                                           |                                                                                                                                                             |
| 9                                                                                                     | Provide a conceptual overview of the data analysis method. A diagram may be helpful.                                                                                                                                                                                                                                                                                                      | Methods (18-19)                                                                                                                                             |
| 10                                                                                                    | Provide a detailed description of all steps of the analysis, including mathematical formulae. This description should cover, as relevant, data cleaning, data pre-processing, data adjustments and weighting of data sources, and mathematical or statistical model(s).                                                                                                                   | Methods (22-26)                                                                                                                                             |
| 11                                                                                                    | Describe how candidate models were evaluated and how the final model(s) were selected.                                                                                                                                                                                                                                                                                                    | Methods (26)                                                                                                                                                |
| 12                                                                                                    | Provide the results of an evaluation of model performance, if done, as well as the results of any relevant sensitivity analysis.                                                                                                                                                                                                                                                          | Supplementary Tables S13-S16                                                                                                                                |
| 13                                                                                                    | Describe methods for calculating uncertainty of the estimates. State which sources of uncertainty were, and were not, accounted for in the uncertainty analysis.                                                                                                                                                                                                                          | Methods (23-25)                                                                                                                                             |
| 14                                                                                                    | State how analytic or statistical source code used to generate estimates can be accessed.                                                                                                                                                                                                                                                                                                 | Code availability (27)                                                                                                                                      |
| <b>Results and Discussion</b>                                                                         |                                                                                                                                                                                                                                                                                                                                                                                           |                                                                                                                                                             |
| 15                                                                                                    | Provide published estimates in a file format from which data can be efficiently extracted.                                                                                                                                                                                                                                                                                                | Table 2; Burden of Proof visualization tool ( <a href="https://vizhub.healthdata.org/burden-of-proof/">https://vizhub.healthdata.org/burden-of-proof/</a> ) |
| 16                                                                                                    | Report a quantitative measure of the uncertainty of the estimates (e.g. uncertainty intervals).                                                                                                                                                                                                                                                                                           | Table 2; Results (5-12)                                                                                                                                     |
| 17                                                                                                    | Interpret results in light of existing evidence. If updating a previous set of estimates, describe the reasons for changes in estimates.                                                                                                                                                                                                                                                  | Discussion (12-15)                                                                                                                                          |
| 18                                                                                                    | Discuss limitations of the estimates. Include a discussion of any modelling assumptions or data limitations that affect interpretation of the estimates.                                                                                                                                                                                                                                  | Discussion (15)                                                                                                                                             |

## Section 5: Study quality & bias assessment

As outlined in more detail in Zheng et al. and in the main manuscript, we used a covariate selection algorithm that systematically detects eligible covariates that reflected a significant source of bias in the included observations. The bias covariates created mainly followed the Grading of Recommendations, Assessment, Development and Evaluations (GRADE) approach, but we created additional ones that were relevant to the secondhand smoke case. In total, we created 13 potential bias covariates that were evaluated for their eligibility to be tested in the algorithm and potentially included in the model. The ‘gold standard’ value was coded as 0, while the alternatives were coded as 1. The covariates were defined as follows:

### 1. Level of adjustment for potential confounding variables

Three bias covariates were generated as a cascading dummy reflecting different levels of adjustment of the effect sizes included in our models. The categories were created after reviewing the overall availability and distribution of confounders across our data. Gold standard **maximally adjusted** (adj\_L0) observations correspond to estimates that were maximally adjusted for age, sex, smoking, and at minimum 3 other potential confounders. Gold standard **adjusted for smoking, age, sex and 1-2 more** (adj\_L1) observations are those that at minimum account for participants’ smoking status, age, sex, and 1 or 2 more confounders. Finally, gold standard **adjusted for age, sex, and smoking** (adj\_L2) observations are any that at least control for the age, sex, and smoking status of participants, regardless of their controlling of other potential confounders.

### Bias covariates to evaluate the level of adjustment of included data points

| Level of adjustment | Definition                                                                                              | Cascading dummy |    |    |
|---------------------|---------------------------------------------------------------------------------------------------------|-----------------|----|----|
|                     |                                                                                                         | L0              | L1 | L2 |
| Insufficient        | Does not control for age, sex, and smoking status regardless of whether it controls for other variables | 1               | 1  | 1  |
| Minimal             | Controls only for age, sex, and smoking                                                                 | 1               | 1  | 0  |
| Moderate            | Controls for age, sex, smoking, and 1-2 additional confounders                                          | 1               | 0  | 0  |
| Maximal             | Controls for age, sex, smoking, and 3 or more confounders                                               | 0               | 0  | 0  |

## 2. Representativeness of study population

Indicates whether the study sample is (0) or is not (1) geographically representative of underlying location

## 3. Prospective-cohort design

Indicates if the study has a prospective cohort design (0) or any other (1).

## 4. Outcome assessment

Reflects how the cases for the study were ascertained. The gold standard is that outcomes were ascertained through physician diagnosis, disease registry, medical record review, or biomarker examination (0). The alternate for this bias covariate is that the outcome was self-reported by the study participants (1).

## 5. Selection bias

Captures if study is at risk for selection bias. Study determined to be at risk for selection bias (1) if loss to follow-up (cohorts) or percent for whom data not ascertained (case-controls) > 20%. Studies that did not report sufficient information for assessment were classified as at risk. Gold-standard cases are those not at risk for selection bias (0).

## 6. Exposure assessment

Indicates whether the exposure to secondhand smoke in cohort studies was assessed at baseline only (1) or multiple times during follow-up (0). Observations from case-control and nested-case control studies were classified as alternate (1).

## 7. Controlled for smoking

Differentiates effect sizes that were controlled for smoking (0) from those that were not (1), regardless of the adjustment for other confounders. Observations associated with never-smokers only, former-smokers only, or non-smokers only were considered controlled for smoking status (0).

## 8. Females only

Flag studies that were done among females only (1) and not with both sexes (0).

## 9. Broad secondhand smoke exposure location

Captures if the study reports on the exposure locations that best match our exposure definition (home, work) (0) or if it reports a broader unspecified location (any location) (1).

## 10. Non-current exposure to secondhand smoke

Indicates if the reported effect size is for current exposure (0) or ever/unspecified exposure (1). Gold standard observations were those that used current exposure to more closely aligns with the exposure definition in the Global Burden of Disease study.

## 11. Aggregate stroke definition – Hemorrhagic stroke:

Specifically for stroke, we created two bias covariates to account for possible differences between studies reporting sub-type-specific effect size only and those reporting stroke as an aggregated outcome. In the hemorrhagic stroke covariate, studies reporting on aggregated stroke or both sub-types (hemorrhagic and ischemic) are considered gold-standard cases (0), while those reporting hemorrhagic stroke only are the alternate (1).

12. Aggregate stroke definition – Ischemic stroke:

Similar to the previous covariate, studies reporting on aggregated stroke or both sub-types (hemorrhagic and ischemic) are considered gold-standard cases (0), while those reporting ischemic stroke only are the alternate (1).

13. Childhood asthma:

Studies were assigned a zero if performed among those aged 16 or less only (if cohort, age at enrollment plus follow-up time is equal or less than 16 years old). Studies including a broader age group were considered alternate. The age cutoff was decided based on data availability (most childhood studies would follow children up to 16 years or less).

We did not create bias covariates for evaluating the form of exposure assessment and reverse causation. All of the studies identified used self-reported exposure data. Unlike for other risk factors, reverse causation for secondhand smoke is unlikely since individuals are not likely to become exposed when they are already sick with the assessed health outcomes, so it was deemed to not be relevant for testing.

Bias covariates were eligible for testing in a model if there were two or more observations for each coded value of the covariate. If two or more bias covariates had the same values across all the observations, we randomly selected one for inclusion in our models. We present the covariates tested for each outcome in Table S20 (N/A indicates covariates that were not tested for the respective model). The selected bias covariates for each model are presented in Table 2 in the main text.

**Table S20. Bias covariates tested in the primary model for each health outcome, by study**

| Author             | Study design       | Health outcome | Subpopulation | Not prosp. cohort | Out. self-reported | Exp. assessment | Potential selection bias | Adj. level 0 | Adj. level 1 | Adj. level 2 | Not adj. smoking | Females only | Broad location exp. | Not current exp. | Asthma children | Hem. stroke | Isch. stroke |
|--------------------|--------------------|----------------|---------------|-------------------|--------------------|-----------------|--------------------------|--------------|--------------|--------------|------------------|--------------|---------------------|------------------|-----------------|-------------|--------------|
| Al-Kubaisy 2005    | Prospective cohort | Asthma         | 0             | 0                 | 0                  | 1               | 0                        | 1            | 1            | 1            | 0                | 1            | 1                   | 0                | 0               | N/A         | N/A          |
| Al-Qerem 2016      | Prospective cohort | Asthma         | 0             | 0                 | 1                  | 0               | 0                        | 1            | 1            | 0            | 0                | 0            | 1                   | 0                | 0               | N/A         | N/A          |
| Arif 2017          | Case-control       | Asthma         | 0             | 1                 | 0                  | 1               | 1                        | 1            | 1            | 1            | 0                | 1            | 1                   | 0                | 0               | N/A         | N/A          |
| Aversa 2021        | Prospective cohort | Asthma         | 0             | 0                 | 0                  | 1               | 0                        | 1            | 1            | 1            | 0                | 1            | 1                   | 1                | 0               | N/A         | N/A          |
| Azizi 1995         | Case-control       | Asthma         | 0             | 1                 | 0                  | 1               | 0                        | 1            | 1            | 1            | 0                | 1            | 1                   | 1                | 0               | N/A         | N/A          |
| Balemans 2006      | Prospective cohort | Asthma         | 0             | 0                 | 1                  | 1               | 1                        | 1            | 1            | 1            | 0                | 1            | 1                   | 1                | 1               | N/A         | N/A          |
| Beijsterveldt 2008 | Prospective cohort | Asthma         | 0             | 0                 | 1                  | 1               | 0                        | 1            | 1            | 1            | 0                | 1            | 1                   | 0                | 0               | N/A         | N/A          |
| Bener 2007         | Case-control       | Asthma         | 0             | 1                 | 0                  | 1               | 0                        | 1            | 1            | 1            | 0                | 1            | 1                   | 1                | 0               | N/A         | N/A          |
| Bergmann 2000      | Prospective cohort | Asthma         | 0             | 0                 | 0                  | 1               | 0                        | 1            | 1            | 0            | 0                | 0            | 1                   | 1                | 0               | N/A         | N/A          |
| Boker 2019         | Case-control       | Asthma         | 0             | 1                 | 0                  | 1               | 1                        | 1            | 1            | 1            | 0                | 1            | 1                   | 0                | 0               | N/A         | N/A          |
| Boneberger 2011    | Case-control       | Asthma         | 0             | 1                 | 0                  | 1               | 0                        | 1            | 1            | 0            | 0                | 0            | 1                   | 1                | 0               | N/A         | N/A          |
| Bozicević 2000     | Case-control       | Asthma         | 0             | 1                 | 1                  | 1               | 0                        | 1            | 1            | 1            | 1                | 0            | 0                   | 1                | 1               | N/A         | N/A          |
| Butland 1997       | Case-control       | Asthma         | 0             | 1                 | 1                  | 1               | 1                        | 1            | 1            | 0            | 0                | 0            | 1                   | 1                | 0               | N/A         | N/A          |
| Carlsten 2012      | Prospective cohort | Asthma         | 0             | 0                 | 1                  | 0               | 1                        | 1            | 1            | 0            | 0                | 0            | 1                   | 1                | 0               | N/A         | N/A          |



**Table S20. Bias covariates tested in the primary model for each health outcome, by study**

| Author         | Study design        | Health outcome | Subpopulation | Not prosp. cohort | Out. self-reported | Exp. assessment | Potential selection bias | Adj. level 0 | Adj. level 1 | Adj. level 2 | Not adj. smoking | Females only | Broad location exp. | Not current exp. | Asthma children | Hem. stroke | Isch. stroke |
|----------------|---------------------|----------------|---------------|-------------------|--------------------|-----------------|--------------------------|--------------|--------------|--------------|------------------|--------------|---------------------|------------------|-----------------|-------------|--------------|
| Carr 2019      | Prospective cohort  | Asthma         | 0             | 0                 | 1                  | 1               | 1                        | 1            | 1            | 0            | 0                | 0            | 1                   | 0                | 0               | N/A         | N/A          |
| Carrasco 2021  | Prospective cohort  | Asthma         | 0             | 0                 | 1                  | 1               | 0                        | 1            | 1            | 0            | 0                | 0            | 1                   | 0                | 0               | N/A         | N/A          |
| Chan 2019      | Case-crossover      | Asthma         | 0             | 1                 | 1                  | 1               | 1                        | 1            | 1            | 0            | 0                | 0            | 0                   | 0                | 1               | N/A         | N/A          |
| Charoena 2013  | Case-control        | Asthma         | 0             | 1                 | 0                  | 1               | 0                        | 1            | 1            | 1            | 0                | 1            | 1                   | 1                | 0               | N/A         | N/A          |
| Chen 2011      | Nested case-control | Asthma         | 1             | 1                 | 0                  | 1               | 0                        | 1            | 1            | 1            | 0                | 1            | 1                   | 1                | 0               | N/A         | N/A          |
| Clark 1994     | Case-control        | Asthma         | 0             | 1                 | 1                  | 1               | 0                        | 1            | 1            | 1            | 0                | 1            | 1                   | 1                | 0               | N/A         | N/A          |
| Coogan 2015    | Prospective cohort  | Asthma         | 0             | 0                 | 1                  | 1               | 0                        | 0            | 0            | 0            | 0                | 0            | 0                   | 0                | 1               | N/A         | N/A          |
| Daigler 1991   | Case-control        | Asthma         | 0             | 1                 | 0                  | 1               | 1                        | 1            | 1            | 0            | 0                | 0            | 1                   | 1                | 0               | N/A         | N/A          |
| David 2005     | Prospective cohort  | Asthma         | 0             | 0                 | 0                  | 1               | 1                        | 1            | 1            | 0            | 0                | 0            | 1                   | 0                | 1               | N/A         | N/A          |
| Dekker 2015    | Prospective cohort  | Asthma         | 0             | 0                 | 0                  | 1               | 0                        | 1            | 1            | 0            | 0                | 0            | 1                   | 0                | 0               | N/A         | N/A          |
| Ehrlich 1992   | Case-control        | Asthma         | 0             | 1                 | 0                  | 1               | 0                        | 1            | 1            | 0            | 0                | 0            | 1                   | 1                | 0               | N/A         | N/A          |
| Ehrlich 1996   | Case-control        | Asthma         | 1             | 1                 | 1                  | 1               | 1                        | 1            | 1            | 1            | 0                | 1            | 1                   | 0                | 0               | N/A         | N/A          |
| El-Sharif 2003 | Case-control        | Asthma         | 0             | 1                 | 1                  | 1               | 1                        | 1            | 1            | 0            | 0                | 0            | 1                   | 1                | 0               | N/A         | N/A          |
| Elder 1996     | Prospective cohort  | Asthma         | 0             | 0                 | 0                  | 1               | 0                        | 1            | 1            | 1            | 0                | 1            | 1                   | 1                | 0               | N/A         | N/A          |

**Table S20. Bias covariates tested in the primary model for each health outcome, by study**

| Author             | Study design       | Health outcome | Subpopulation | Not prosp. cohort | Out. self-reported | Exp. assessment | Potential selection bias | Adj. level 0 | Adj. level 1 | Adj. level 2 | Not adj. smoking | Females only | Broad location exp. | Not current exp. | Asthma children | Hem. stroke | Isch. stroke |
|--------------------|--------------------|----------------|---------------|-------------------|--------------------|-----------------|--------------------------|--------------|--------------|--------------|------------------|--------------|---------------------|------------------|-----------------|-------------|--------------|
| Fagbule 1994       | Case-control       | Asthma         | 0             | 1                 | 1                  | 1               | 0                        | 1            | 1            | 1            | 0                | 1            | 1                   | 1                | 0               | N/A         | N/A          |
| Fernando 2009      | Case-control       | Asthma         | 0             | 1                 | 0                  | 1               | 0                        | 1            | 1            | 0            | 0                | 0            | 1                   | 0                | 0               | N/A         | N/A          |
| Flexeder 2019      | Prospective cohort | Asthma         | 0             | 0                 | 0                  | 0               | 1                        | 1            | 0            | 0            | 0                | 0            | 1                   | 0                | 1               | N/A         | N/A          |
| Flodin 1995        | Case-control       | Asthma         | 1             | 1                 | 0                  | 1               | 1                        | 1            | 1            | 1            | 1                | 0            | 1                   | 1                | 1               | N/A         | N/A          |
| Frassanito 2022    | Case-control       | Asthma         | 0             | 1                 | 0                  | 1               | 1                        | 1            | 1            | 1            | 0                | 1            | 1                   | 1                | 0               | N/A         | N/A          |
| Galobardes 2015    | Prospective cohort | Asthma         | 0             | 0                 | 0                  | 1               | 1                        | 1            | 1            | 0            | 0                | 0            | 1                   | 0                | 0               | N/A         | N/A          |
| Genuneit 2006      | Prospective cohort | Asthma         | 1             | 0                 | 1                  | 1               | 1                        | 1            | 1            | 0            | 0                | 0            | 1                   | 0                | 1               | N/A         | N/A          |
| Goksör 2006        | Prospective cohort | Asthma         | 0             | 0                 | 1                  | 1               | 1                        | 1            | 1            | 1            | 0                | 1            | 1                   | 1                | 1               | N/A         | N/A          |
| Grabenhenrich 2014 | Prospective cohort | Asthma         | 0             | 0                 | 0                  | 0               | 1                        | 1            | 1            | 0            | 0                | 0            | 1                   | 0                | 1               | N/A         | N/A          |
| Guo 2019           | Case-control       | Asthma         | 0             | 1                 | 0                  | 1               | 0                        | 1            | 1            | 0            | 0                | 0            | 1                   | 0                | 0               | N/A         | N/A          |
| Hadnadjev 2011     | Case-control       | Asthma         | 0             | 1                 | 0                  | 1               | 0                        | 1            | 1            | 1            | 0                | 1            | 1                   | 0                | 0               | N/A         | N/A          |
| Hagendorens 2005   | Prospective cohort | Asthma         | 0             | 0                 | 1                  | 1               | 1                        | 1            | 1            | 0            | 0                | 0            | 1                   | 1                | 0               | N/A         | N/A          |
| Hedman 2011        | Prospective cohort | Asthma         | 0             | 0                 | 1                  | 0               | 0                        | 1            | 1            | 0            | 0                | 0            | 1                   | 0                | 1               | N/A         | N/A          |

**Table S20. Bias covariates tested in the primary model for each health outcome, by study**

| Author            | Study design       | Health outcome | Subpopulation | Not prosp. cohort | Out. self-reported | Exp. assessment | Potential selection bias | Adj. level 0 | Adj. level 1 | Adj. level 2 | Not adj. smoking | Females only | Broad location exp. | Not current exp. | Asthma children | Hem. stroke | Isch. stroke |
|-------------------|--------------------|----------------|---------------|-------------------|--------------------|-----------------|--------------------------|--------------|--------------|--------------|------------------|--------------|---------------------|------------------|-----------------|-------------|--------------|
| Horwood 1985      | Prospective cohort | Asthma         | 0             | 0                 | 0                  | 0               | 0                        | 1            | 1            | 1            | 0                | 1            | 1                   | 1                | 0               | N/A         | N/A          |
| Huang 2022        | Case-control       | Asthma         | 0             | 1                 | 0                  | 1               | 0                        | 1            | 1            | 0            | 0                | 0            | 1                   | 0                | 1               | N/A         | N/A          |
| Hunt 2011         | Prospective cohort | Asthma         | 0             | 0                 | 0                  | 0               | 0                        | 1            | 1            | 1            | 0                | 1            | 1                   | 0                | 0               | N/A         | N/A          |
| Hwang 2011        | Case-control       | Asthma         | 1             | 1                 | 1                  | 1               | 1                        | 1            | 1            | 1            | 0                | 1            | 1                   | 1                | 0               | N/A         | N/A          |
| Håberg 2007       | Prospective cohort | Asthma         | 1             | 0                 | 1                  | 1               | 0                        | 1            | 1            | 0            | 0                | 0            | 1                   | 1                | 0               | N/A         | N/A          |
| Izuhara 2016      | Prospective cohort | Asthma         | 0             | 0                 | 1                  | 1               | 0                        | 1            | 1            | 0            | 0                | 0            | 1                   | 1                | 1               | N/A         | N/A          |
| Jaakkola 2001     | Prospective cohort | Asthma         | 0             | 0                 | 0                  | 1               | 0                        | 1            | 1            | 0            | 0                | 0            | 1                   | 1                | 0               | N/A         | N/A          |
| Jaakkola 2003     | Case-control       | Asthma         | 0             | 1                 | 0                  | 1               | 1                        | 1            | 1            | 0            | 0                | 0            | 0                   | 1                | 1               | N/A         | N/A          |
| Jedrychowski 2008 | Prospective cohort | Asthma         | 0             | 0                 | 1                  | 1               | 0                        | 1            | 1            | 1            | 0                | 1            | 1                   | 1                | 0               | N/A         | N/A          |
| Kamran 2015       | Case-control       | Asthma         | 0             | 1                 | 0                  | 1               | 0                        | 1            | 1            | 1            | 1                | 0            | 1                   | 1                | 0               | N/A         | N/A          |
| Kanoh 2012        | Prospective cohort | Asthma         | 0             | 0                 | 1                  | 1               | 1                        | 1            | 1            | 0            | 0                | 0            | 1                   | 0                | 0               | N/A         | N/A          |
| Karunasekera 2001 | Case-control       | Asthma         | 0             | 1                 | 0                  | 1               | 0                        | 1            | 1            | 1            | 0                | 1            | 1                   | 0                | 0               | N/A         | N/A          |
| Khozime 2019      | Case-control       | Asthma         | 0             | 1                 | 0                  | 1               | 1                        | 1            | 1            | 1            | 0                | 1            | 1                   | 0                | 1               | N/A         | N/A          |
| Kim 2018          | Case-cohort        | Asthma         | 0             | 1                 | 0                  | 1               | 1                        | 1            | 0            | 0            | 0                | 0            | 1                   | 0                | 0               | N/A         | N/A          |

**Table S20. Bias covariates tested in the primary model for each health outcome, by study**

| Author                | Study design       | Health outcome | Subpopulation | Not prosp. cohort | Out. self-reported | Exp. assessment | Potential selection bias | Adj. level 0 | Adj. level 1 | Adj. level 2 | Not adj. smoking | Females only | Broad location exp. | Not current exp. | Asthma children | Hem. stroke | Isch. stroke |
|-----------------------|--------------------|----------------|---------------|-------------------|--------------------|-----------------|--------------------------|--------------|--------------|--------------|------------------|--------------|---------------------|------------------|-----------------|-------------|--------------|
| Klennert 2001         | Prospective cohort | Asthma         | 0             | 0                 | 0                  | 1               | 0                        | 1            | 1            | 1            | 0                | 1            | 1                   | 1                | 0               | N/A         | N/A          |
| Kobyletzki 2012       | Prospective cohort | Asthma         | 0             | 0                 | 1                  | 1               | 1                        | 1            | 1            | 0            | 0                | 0            | 1                   | 1                | 0               | N/A         | N/A          |
| Kumar 2021            | Case-control       | Asthma         | 0             | 1                 | 0                  | 1               | 1                        | 1            | 1            | 1            | 0                | 1            | 1                   | 1                | 0               | N/A         | N/A          |
| Kurukulaarachthy 2006 | Prospective cohort | Asthma         | 1             | 0                 | 1                  | 0               | 0                        | 1            | 1            | 0            | 0                | 0            | 1                   | 0                | 0               | N/A         | N/A          |
| Lawson 2014           | Prospective cohort | Asthma         | 1             | 0                 | 1                  | 0               | 1                        | 0            | 0            | 0            | 0                | 0            | 1                   | 0                | 1               | N/A         | N/A          |
| Leen 1994             | Case-control       | Asthma         | 0             | 1                 | 0                  | 1               | 0                        | 1            | 1            | 1            | 1                | 1            | 1                   | 1                | 0               | N/A         | N/A          |
| Lemanske 2005         | Prospective cohort | Asthma         | 0             | 0                 | 0                  | 1               | 0                        | 1            | 1            | 1            | 0                | 1            | 1                   | 1                | 0               | N/A         | N/A          |
| Li 2013               | Prospective cohort | Asthma         | 0             | 0                 | 0                  | 1               | 1                        | 1            | 0            | 0            | 0                | 0            | 1                   | 1                | 1               | N/A         | N/A          |
| Liljeqvist 1997       | Case-control       | Asthma         | 0             | 1                 | 1                  | 1               | 1                        | 1            | 1            | 1            | 0                | 1            | 1                   | 0                | 0               | N/A         | N/A          |
| Litonjua 2001         | Prospective cohort | Asthma         | 0             | 0                 | 0                  | 1               | 0                        | 1            | 1            | 1            | 0                | 1            | 1                   | 0                | 0               | N/A         | N/A          |
| Majeed 2008           | Case-control       | Asthma         | 0             | 1                 | 0                  | 1               | 0                        | 1            | 1            | 1            | 0                | 1            | 1                   | 1                | 0               | N/A         | N/A          |
| Marbury 1996          | Prospective cohort | Asthma         | 0             | 0                 | 0                  | 1               | 1                        | 1            | 1            | 1            | 0                | 1            | 1                   | 1                | 0               | N/A         | N/A          |
| McConnell 2002        | Prospective cohort | Asthma         | 0             | 0                 | 0                  | 1               | 0                        | 1            | 1            | 1            | 1                | 0            | 1                   | 0                | 1               | N/A         | N/A          |

**Table S20. Bias covariates tested in the primary model for each health outcome, by study**

| Author             | Study design        | Health outcome | Subpopulation | Not prosp. cohort | Out. self-reported | Exp. assessment | Potential selection bias | Adj. level 0 | Adj. level 1 | Adj. level 2 | Not adj. smoking | Females only | Broad location exp. | Not current exp. | Asthma children | Hem. stroke | Isch. stroke |
|--------------------|---------------------|----------------|---------------|-------------------|--------------------|-----------------|--------------------------|--------------|--------------|--------------|------------------|--------------|---------------------|------------------|-----------------|-------------|--------------|
| McKeever 2001      | Prospective cohort  | Asthma         | 0             | 0                 | 0                  | 1               | 0                        | 1            | 1            | 1            | 0                | 1            | 1                   | 0                | 0               | N/A         | N/A          |
| Melsom 2001        | Nested case-control | Asthma         | 1             | 1                 | 1                  | 1               | 0                        | 1            | 1            | 1            | 1                | 1            | 1                   | 0                | 1               | N/A         | N/A          |
| Midodzi 2010       | Prospective cohort  | Asthma         | 1             | 0                 | 1                  | 1               | 0                        | 1            | 1            | 1            | 0                | 1            | 1                   | 0                | 0               | N/A         | N/A          |
| Milanzi 2017       | Prospective cohort  | Asthma         | 1             | 0                 | 1                  | 0               | 1                        | 1            | 1            | 0            | 0                | 0            | 1                   | 1                | 1               | N/A         | N/A          |
| Milner 2004        | Prospective cohort  | Asthma         | 0             | 0                 | 0                  | 1               | 0                        | 1            | 1            | 1            | 0                | 1            | 1                   | 1                | 0               | N/A         | N/A          |
| Mommers 2005       | Nested case-control | Asthma         | 0             | 1                 | 1                  | 1               | 1                        | 1            | 1            | 0            | 0                | 0            | 1                   | 1                | 0               | N/A         | N/A          |
| Morfin-Maciel 2006 | Case-control        | Asthma         | 1             | 1                 | 1                  | 1               | 0                        | 1            | 1            | 1            | 1                | 1            | 1                   | 0                | 0               | N/A         | N/A          |
| Morfin-Maciel 2006 | Case-control        | Asthma         | 1             | 1                 | 1                  | 1               | 0                        | 1            | 1            | 1            | 0                | 1            | 1                   | 0                | 0               | N/A         | N/A          |
| Mpairwe 2019       | Case-control        | Asthma         | 0             | 1                 | 0                  | 1               | 0                        | 1            | 1            | 0            | 0                | 0            | 1                   | 0                | 1               | N/A         | N/A          |
| Mumcuoglu 1994     | Case-control        | Asthma         | 0             | 1                 | 0                  | 1               | 0                        | 1            | 1            | 1            | 1                | 1            | 1                   | 1                | 0               | N/A         | N/A          |
| Murray 2004        | Prospective cohort  | Asthma         | 0             | 0                 | 0                  | 0               | 0                        | 1            | 1            | 0            | 0                | 0            | 1                   | 0                | 0               | N/A         | N/A          |
| Muñoz 2012         | Case-control        | Asthma         | 0             | 1                 | 1                  | 1               | 0                        | 1            | 1            | 1            | 0                | 1            | 1                   | 1                | 0               | N/A         | N/A          |
| Neuman 2012        | Prospective cohort  | Asthma         | 0             | 0                 | 1                  | 1               | 1                        | 1            | 1            | 0            | 0                | 0            | 1                   | 1                | 0               | N/A         | N/A          |

**Table S20. Bias covariates tested in the primary model for each health outcome, by study**

| Author         | Study design         | Health outcome | Subpopulation | Not prosp. cohort | Out. self-reported | Exp. assessment | Potential selection bias | Adj. level 0 | Adj. level 1 | Adj. level 2 | Not adj. smoking | Females only | Broad location exp. | Not current exp. | Asthma children | Hem. stroke | Isch. stroke |
|----------------|----------------------|----------------|---------------|-------------------|--------------------|-----------------|--------------------------|--------------|--------------|--------------|------------------|--------------|---------------------|------------------|-----------------|-------------|--------------|
| Nguyen 2010    | Nested case-control  | Asthma         | 1             | 1                 | 1                  | 1               | 1                        | 1            | 1            | 1            | 1                | 0            | 1                   | 0                | 1               | N/A         | N/A          |
| Norbäck 2018   | Retrospective cohort | Asthma         | 1             | 1                 | 1                  | 1               | 1                        | 1            | 1            | 0            | 0                | 0            | 1                   | 1                | 0               | N/A         | N/A          |
| O'Connell 1974 | Case-control         | Asthma         | 0             | 1                 | 0                  | 1               | 0                        | 1            | 1            | 1            | 1                | 1            | 1                   | 1                | 0               | N/A         | N/A          |
| Oddy 1999      | Prospective cohort   | Asthma         | 0             | 0                 | 1                  | 1               | 1                        | 1            | 1            | 1            | 0                | 1            | 1                   | 1                | 0               | N/A         | N/A          |
| Palvo 2008     | Case-control         | Asthma         | 1             | 1                 | 1                  | 1               | 1                        | 1            | 1            | 1            | 0                | 1            | 1                   | 0                | 0               | N/A         | N/A          |
| Patrick 2020   | Prospective cohort   | Asthma         | 0             | 0                 | 0                  | 0               | 0                        | 1            | 0            | 0            | 0                | 0            | 1                   | 1                | 0               | N/A         | N/A          |
| Pattemore 2018 | Prospective cohort   | Asthma         | 0             | 0                 | 1                  | 0               | 0                        | 1            | 1            | 1            | 0                | 1            | 1                   | 1                | 0               | N/A         | N/A          |
| Pokharel 2001  | Case-control         | Asthma         | 0             | 1                 | 1                  | 1               | 0                        | 1            | 1            | 1            | 1                | 1            | 1                   | 1                | 0               | N/A         | N/A          |
| Pokharel 2007  | Case-control         | Asthma         | 0             | 1                 | 1                  | 1               | 0                        | 1            | 1            | 1            | 1                | 1            | 1                   | 1                | 0               | N/A         | N/A          |
| Polk 2004      | Prospective cohort   | Asthma         | 0             | 0                 | 1                  | 1               | 0                        | 1            | 1            | 1            | 0                | 1            | 1                   | 1                | 0               | N/A         | N/A          |
| Polosa 2005    | Retrospective cohort | Asthma         | 0             | 1                 | 0                  | 1               | 1                        | 1            | 1            | 1            | 1                | 1            | 1                   | 1                | 1               | N/A         | N/A          |
| Ponsonby 2000  | Prospective cohort   | Asthma         | 0             | 0                 | 1                  | 1               | 1                        | 1            | 1            | 0            | 0                | 0            | 1                   | 1                | 0               | N/A         | N/A          |
| Ratageri 2000  | Case-control         | Asthma         | 0             | 1                 | 0                  | 1               | 0                        | 1            | 1            | 1            | 1                | 1            | 1                   | 1                | 0               | N/A         | N/A          |
| Rennie 2008    | Case-control         | Asthma         | 0             | 1                 | 0                  | 1               | 1                        | 1            | 1            | 1            | 0                | 1            | 1                   | 1                | 0               | N/A         | N/A          |

**Table S20. Bias covariates tested in the primary model for each health outcome, by study**

| Author         | Study design         | Health outcome | Subpopulation | Not prosp. cohort | Out. self-reported | Exp. assessment | Potential selection bias | Adj. level 0 | Adj. level 1 | Adj. level 2 | Not adj. smoking | Females only | Broad location exp. | Not current exp. | Asthma children | Hem. stroke | Isch. stroke |
|----------------|----------------------|----------------|---------------|-------------------|--------------------|-----------------|--------------------------|--------------|--------------|--------------|------------------|--------------|---------------------|------------------|-----------------|-------------|--------------|
| Rosa 2011      | Prospective cohort   | Asthma         | 0             | 0                 | 0                  | 0               | 0                        | 1            | 1            | 0            | 0                | 0            | 1                   | 1                | 0               | N/A         | N/A          |
| Schroer 2009   | Prospective cohort   | Asthma         | 0             | 0                 | 1                  | 1               | 0                        | 1            | 1            | 0            | 0                | 0            | 1                   | 0                | 0               | N/A         | N/A          |
| Sears 2002     | Prospective cohort   | Asthma         | 0             | 0                 | 1                  | 0               | 0                        | 1            | 1            | 1            | 0                | 1            | 1                   | 1                | 0               | N/A         | N/A          |
| Selby 2018     | Prospective cohort   | Asthma         | 0             | 0                 | 1                  | 1               | 1                        | 1            | 1            | 0            | 0                | 0            | 1                   | 0                | 0               | N/A         | N/A          |
| Sherman 1990   | Prospective cohort   | Asthma         | 0             | 0                 | 0                  | 0               | 0                        | 1            | 1            | 0            | 0                | 0            | 1                   | 1                | 1               | N/A         | N/A          |
| Slob 2020      | Retrospective cohort | Asthma         | 0             | 1                 | 1                  | 0               | 1                        | 1            | 1            | 1            | 0                | 1            | 1                   | 1                | 0               | N/A         | N/A          |
| Snodgrass 2016 | Prospective cohort   | Asthma         | 0             | 0                 | 1                  | 0               | 0                        | 1            | 1            | 1            | 0                | 1            | 1                   | 0                | 0               | N/A         | N/A          |
| Strachan 1996  | Prospective cohort   | Asthma         | 0             | 0                 | 1                  | 0               | 1                        | 1            | 1            | 0            | 0                | 0            | 1                   | 1                | 1               | N/A         | N/A          |
| Sun 2015       | Prospective cohort   | Asthma         | 0             | 0                 | 1                  | 0               | 0                        | 1            | 0            | 0            | 0                | 0            | 1                   | 0                | 0               | N/A         | N/A          |
| Surdu 2006     | Case-control         | Asthma         | 0             | 1                 | 0                  | 1               | 0                        | 1            | 1            | 1            | 0                | 1            | 1                   | 0                | 0               | N/A         | N/A          |
| Tadaki 2009    | Prospective cohort   | Asthma         | 0             | 0                 | 0                  | 1               | 1                        | 1            | 1            | 1            | 0                | 1            | 1                   | 1                | 0               | N/A         | N/A          |
| Takemura 2001  | Case-control         | Asthma         | 0             | 1                 | 0                  | 1               | 0                        | 1            | 1            | 1            | 1                | 0            | 1                   | 1                | 0               | N/A         | N/A          |

**Table S20. Bias covariates tested in the primary model for each health outcome, by study**

| Author       | Study design        | Health outcome | Subpopulation | Not prosp. cohort | Out. self-reported | Exp. assessment | Potential selection bias | Adj. level 0 | Adj. level 1 | Adj. level 2 | Not adj. smoking | Females only | Broad location exp. | Not current exp. | Asthma children | Hem. stroke | Isch. stroke |
|--------------|---------------------|----------------|---------------|-------------------|--------------------|-----------------|--------------------------|--------------|--------------|--------------|------------------|--------------|---------------------|------------------|-----------------|-------------|--------------|
| Tanaka 2008  | Prospective cohort  | Asthma         | 0             | 0                 | 1                  | 1               | 1                        | 1            | 1            | 0            | 0                | 0            | 1                   | 1                | 0               | N/A         | N/A          |
| Tanaka 2017  | Prospective cohort  | Asthma         | 1             | 0                 | 1                  | 0               | 1                        | 1            | 0            | 0            | 0                | 0            | 1                   | 1                | 0               | N/A         | N/A          |
| Taveras 2006 | Prospective cohort  | Asthma         | 0             | 0                 | 1                  | 0               | 1                        | 1            | 1            | 0            | 0                | 0            | 1                   | 1                | 0               | N/A         | N/A          |
| Thacher 2014 | Prospective cohort  | Asthma         | 0             | 0                 | 1                  | 0               | 0                        | 1            | 1            | 0            | 0                | 0            | 1                   | 1                | 0               | N/A         | N/A          |
| Thacher 2018 | Prospective cohort  | Asthma         | 0             | 0                 | 1                  | 0               | 1                        | 1            | 1            | 0            | 0                | 0            | 1                   | 1                | 0               | N/A         | N/A          |
| Thorn 2001   | Nested case-control | Asthma         | 0             | 1                 | 0                  | 1               | 1                        | 1            | 1            | 0            | 0                | 0            | 1                   | 1                | 1               | N/A         | N/A          |
| Toizumi 2019 | Prospective cohort  | Asthma         | 0             | 0                 | 1                  | 1               | 1                        | 1            | 0            | 0            | 0                | 0            | 1                   | 0                | 0               | N/A         | N/A          |
| Usemann 2018 | Prospective cohort  | Asthma         | 0             | 0                 | 1                  | 0               | 0                        | 1            | 1            | 0            | 0                | 0            | 1                   | 0                | 0               | N/A         | N/A          |
| Valk 2012    | Prospective cohort  | Asthma         | 0             | 0                 | 1                  | 1               | 0                        | 1            | 1            | 0            | 0                | 0            | 1                   | 0                | 0               | N/A         | N/A          |
| Vázquez 2006 | Case-control        | Asthma         | 0             | 1                 | 1                  | 1               | 0                        | 1            | 1            | 1            | 1                | 1            | 1                   | 1                | 1               | N/A         | N/A          |
| Wada 2021    | Prospective cohort  | Asthma         | 0             | 0                 | 1                  | 1               | 0                        | 1            | 1            | 0            | 0                | 0            | 1                   | 1                | 0               | N/A         | N/A          |
| Wang 2021    | Prospective cohort  | Asthma         | 0             | 0                 | 0                  | 1               | 1                        | 1            | 0            | 0            | 0                | 0            | 1                   | 0                | 1               | N/A         | N/A          |



**Table S20. Bias covariates tested in the primary model for each health outcome, by study**

| Author                 | Study design        | Health outcome | Subpopulation | Not prosp. cohort | Out. self-reported | Exp. assessment | Potential selection bias | Adj. level 0 | Adj. level 1 | Adj. level 2 | Not adj. smoking | Females only | Broad location exp. | Not current exp. | Asthma children | Hem. stroke | Isch. stroke |
|------------------------|---------------------|----------------|---------------|-------------------|--------------------|-----------------|--------------------------|--------------|--------------|--------------|------------------|--------------|---------------------|------------------|-----------------|-------------|--------------|
| Werff 2013             | Prospective cohort  | Asthma         | 1             | 0                 | 1                  | 1               | 0                        | 1            | 1            | 1            | 0                | 1            | 1                   | 0                | 1               | N/A         | N/A          |
| Willers 1991           | Case-control        | Asthma         | 0             | 1                 | 0                  | 1               | 0                        | 1            | 1            | 1            | 1                | 1            | 1                   | 1                | 0               | N/A         | N/A          |
| Yang 1998              | Case-control        | Asthma         | 0             | 1                 | 0                  | 1               | 1                        | 1            | 1            | 0            | 0                | 0            | 1                   | 0                | 0               | N/A         | N/A          |
| Yang 1998              | Case-control        | Asthma         | 0             | 1                 | 1                  | 1               | 0                        | 1            | 1            | 0            | 0                | 0            | 1                   | 0                | 0               | N/A         | N/A          |
| Youssef 2018           | Case-control        | Asthma         | 0             | 1                 | 0                  | 1               | 1                        | 1            | 1            | 0            | 0                | 0            | 1                   | 0                | 0               | N/A         | N/A          |
| Zejda 2003             | Prospective cohort  | Asthma         | 0             | 0                 | 0                  | 1               | 1                        | 1            | 1            | 1            | 0                | 1            | 1                   | 1                | 0               | N/A         | N/A          |
| Zheng 2002             | Case-control        | Asthma         | 1             | 1                 | 0                  | 1               | 0                        | 1            | 1            | 0            | 0                | 0            | 1                   | 1                | 0               | N/A         | N/A          |
| Ahern 2009             | Case-control        | Breast cancer  | 0             | 1                 | N/A                | N/A             | 0                        | 1            | 0            | 0            | 0                | N/A          | 0                   | 1                | N/A             | N/A         | N/A          |
| Alberg 2004            | Nested case-control | Breast cancer  | 0             | 1                 | N/A                | N/A             | 0                        | 1            | 0            | 0            | 0                | N/A          | 1                   | 1                | N/A             | N/A         | N/A          |
| Anderson 2012          | Case-control        | Breast cancer  | 0             | 1                 | N/A                | N/A             | 1                        | 1            | 1            | 0            | 0                | N/A          | 0                   | 1                | N/A             | N/A         | N/A          |
| Bonner 2005            | Case-control        | Breast cancer  | 1             | 1                 | N/A                | N/A             | 1                        | 0            | 0            | 0            | 0                | N/A          | 0                   | 1                | N/A             | N/A         | N/A          |
| Chaveepojnkamjorn 2017 | Case-control        | Breast cancer  | 0             | 1                 | N/A                | N/A             | 1                        | 1            | 1            | 1            | 1                | N/A          | 1                   | 0                | N/A             | N/A         | N/A          |
| De 2010                | Case-control        | Breast cancer  | 0             | 1                 | N/A                | N/A             | 0                        | 1            | 1            | 0            | 0                | N/A          | 1                   | 0                | N/A             | N/A         | N/A          |
| Dianatinasab 2017      | Case-control        | Breast cancer  | 0             | 1                 | N/A                | N/A             | 0                        | 1            | 0            | 0            | 0                | N/A          | 1                   | 0                | N/A             | N/A         | N/A          |
| Dossus 2014            | Prospective cohort  | Breast cancer  | 0             | 0                 | N/A                | N/A             | 0                        | 1            | 1            | 1            | 0                | N/A          | 0                   | 1                | N/A             | N/A         | N/A          |

**Table S20. Bias covariates tested in the primary model for each health outcome, by study**

| Author            | Study design       | Health outcome | Subpopulation | Not prosp. cohort | Out. self-reported | Exp. assessment | Potential selection bias | Adj. level 0 | Adj. level 1 | Adj. level 2 | Not adj. smoking | Females only | Broad location exp. | Not current exp. | Asthma children | Hem. stroke | Isch. stroke |
|-------------------|--------------------|----------------|---------------|-------------------|--------------------|-----------------|--------------------------|--------------|--------------|--------------|------------------|--------------|---------------------|------------------|-----------------|-------------|--------------|
| El-Sheikh 2021    | Case-control       | Breast cancer  | 0             | 1                 | N/A                | N/A             | 1                        | 1            | 1            | 0            | 0                | N/A          | 1                   | 0                | N/A             | N/A         | N/A          |
| Fararouei 2019    | Case-control       | Breast cancer  | 0             | 1                 | N/A                | N/A             | 0                        | 0            | 0            | 0            | 0                | N/A          | 1                   | 0                | N/A             | N/A         | N/A          |
| Fu 2015           | Case-control       | Breast cancer  | 0             | 1                 | N/A                | N/A             | 1                        | 1            | 1            | 1            | 1                | N/A          | 1                   | 0                | N/A             | N/A         | N/A          |
| Gao 2013          | Case-control       | Breast cancer  | 0             | 1                 | N/A                | N/A             | 0                        | 1            | 1            | 1            | 1                | N/A          | 1                   | 0                | N/A             | N/A         | N/A          |
| Hanaoka 2005      | Prospective cohort | Breast cancer  | 1             | 0                 | N/A                | N/A             | 0                        | 1            | 0            | 0            | 0                | N/A          | 1                   | 1                | N/A             | N/A         | N/A          |
| Hirose 1995       | Case-control       | Breast cancer  | 0             | 1                 | N/A                | N/A             | 0                        | 1            | 1            | 0            | 0                | N/A          | 1                   | 1                | N/A             | N/A         | N/A          |
| Hosseinzadeh 2014 | Case-control       | Breast cancer  | 0             | 1                 | N/A                | N/A             | 1                        | 1            | 1            | 1            | 1                | N/A          | 1                   | 0                | N/A             | N/A         | N/A          |
| Hsieh 2014        | Case-control       | Breast cancer  | 0             | 1                 | N/A                | N/A             | 1                        | 1            | 1            | 1            | 1                | N/A          | 1                   | 1                | N/A             | N/A         | N/A          |
| Hu 2013           | Case-control       | Breast cancer  | 0             | 1                 | N/A                | N/A             | 0                        | 1            | 1            | 1            | 1                | N/A          | 0                   | 1                | N/A             | N/A         | N/A          |
| Ilic 2013         | Case-control       | Breast cancer  | 0             | 1                 | N/A                | N/A             | 1                        | 0            | 0            | 0            | 0                | N/A          | 0                   | 0                | N/A             | N/A         | N/A          |
| Jee 1999          | Prospective cohort | Breast cancer  | 0             | 0                 | N/A                | N/A             | 0                        | 1            | 0            | 0            | 0                | N/A          | 1                   | 0                | N/A             | N/A         | N/A          |
| Johnson 2000      | Case-control       | Breast cancer  | 1             | 1                 | N/A                | N/A             | 1                        | 0            | 0            | 0            | 0                | N/A          | 0                   | 1                | N/A             | N/A         | N/A          |
| Kariri 2017       | Case-control       | Breast cancer  | 0             | 1                 | N/A                | N/A             | 1                        | 1            | 1            | 1            | 1                | N/A          | 1                   | 0                | N/A             | N/A         | N/A          |
| Lash 1999         | Case-control       | Breast cancer  | 0             | 1                 | N/A                | N/A             | 1                        | 1            | 0            | 0            | 0                | N/A          | 1                   | 1                | N/A             | N/A         | N/A          |
| Lash 2002         | Case-control       | Breast cancer  | 1             | 1                 | N/A                | N/A             | 1                        | 1            | 0            | 0            | 0                | N/A          | 1                   | 1                | N/A             | N/A         | N/A          |
| Li 2015           | Case-control       | Breast cancer  | 0             | 1                 | N/A                | N/A             | 0                        | 1            | 0            | 0            | 0                | N/A          | 0                   | 1                | N/A             | N/A         | N/A          |

**Table S20. Bias covariates tested in the primary model for each health outcome, by study**

| Author        | Study design       | Health outcome | Subpopulation | Not prosp. cohort | Out. self-reported | Exp. assessment | Potential selection bias | Adj. level 0 | Adj. level 1 | Adj. level 2 | Not adj. smoking | Females only | Broad location exp. | Not current exp. | Asthma children | Hem. stroke | Isch. stroke |
|---------------|--------------------|----------------|---------------|-------------------|--------------------|-----------------|--------------------------|--------------|--------------|--------------|------------------|--------------|---------------------|------------------|-----------------|-------------|--------------|
| Lin 2008      | Prospective cohort | Breast cancer  | 0             | 0                 | N/A                | N/A             | 0                        | 1            | 0            | 0            | 0                | N/A          | 1                   | 1                | N/A             | N/A         | N/A          |
| Liu 2000      | Case-control       | Breast cancer  | 0             | 1                 | N/A                | N/A             | 1                        | 1            | 1            | 0            | 0                | N/A          | 0                   | 1                | N/A             | N/A         | N/A          |
| Luo 2011      | Prospective cohort | Breast cancer  | 0             | 0                 | N/A                | N/A             | 0                        | 0            | 0            | 0            | 0                | N/A          | 0                   | 1                | N/A             | N/A         | N/A          |
| Marzouk 2009  | Case-control       | Breast cancer  | 0             | 1                 | N/A                | N/A             | 1                        | 1            | 1            | 1            | 1                | N/A          | 1                   | 0                | N/A             | N/A         | N/A          |
| Metsola 2005  | Case-control       | Breast cancer  | 0             | 1                 | N/A                | N/A             | 1                        | 1            | 1            | 0            | 0                | N/A          | 0                   | 1                | N/A             | N/A         | N/A          |
| Millikan 1998 | Case-control       | Breast cancer  | 0             | 1                 | N/A                | N/A             | 1                        | 1            | 0            | 0            | 0                | N/A          | 1                   | 1                | N/A             | N/A         | N/A          |
| Morabia 1996  | Case-control       | Breast cancer  | 1             | 1                 | N/A                | N/A             | 1                        | 0            | 0            | 0            | 0                | N/A          | 1                   | 1                | N/A             | N/A         | N/A          |
| Niehoff 2017  | Case-control       | Breast cancer  | 0             | 1                 | N/A                | N/A             | 1                        | 1            | 1            | 1            | 1                | N/A          | 1                   | 1                | N/A             | N/A         | N/A          |
| Nishino 2001  | Prospective cohort | Breast cancer  | 0             | 0                 | N/A                | N/A             | 0                        | 1            | 1            | 0            | 0                | N/A          | 1                   | 0                | N/A             | N/A         | N/A          |
| Nishino 2014  | Case-control       | Breast cancer  | 0             | 1                 | N/A                | N/A             | 0                        | 0            | 0            | 0            | 0                | N/A          | 1                   | 0                | N/A             | N/A         | N/A          |
| Pimhanam 2014 | Case-control       | Breast cancer  | 0             | 1                 | N/A                | N/A             | 1                        | 1            | 0            | 0            | 0                | N/A          | 1                   | 1                | N/A             | N/A         | N/A          |
| Pirie 2008    | Prospective cohort | Breast cancer  | 0             | 0                 | N/A                | N/A             | 1                        | 1            | 0            | 0            | 0                | N/A          | 1                   | 1                | N/A             | N/A         | N/A          |
| Reynolds 2009 | Prospective cohort | Breast cancer  | 0             | 0                 | N/A                | N/A             | 0                        | 0            | 0            | 0            | 0                | N/A          | 0                   | 1                | N/A             | N/A         | N/A          |
| Roddam 2007   | Case-control       | Breast cancer  | 0             | 1                 | N/A                | N/A             | 0                        | 1            | 0            | 0            | 0                | N/A          | 1                   | 1                | N/A             | N/A         | N/A          |
| Rollison 2008 | Case-control       | Breast cancer  | 1             | 1                 | N/A                | N/A             | 1                        | 1            | 0            | 0            | 0                | N/A          | 0                   | 1                | N/A             | N/A         | N/A          |

**Table S20. Bias covariates tested in the primary model for each health outcome, by study**

| Author           | Study design        | Health outcome                        | Subpopulation | Not prosp. cohort | Out. self-reported | Exp. assessment | Potential selection bias | Adj. level 0 | Adj. level 1 | Adj. level 2 | Not adj. smoking | Females only | Broad location exp. | Not current exp. | Asthma children | Hem. stroke | Isch. stroke |
|------------------|---------------------|---------------------------------------|---------------|-------------------|--------------------|-----------------|--------------------------|--------------|--------------|--------------|------------------|--------------|---------------------|------------------|-----------------|-------------|--------------|
| Shrubsole 2004   | Case-control        | Breast cancer                         | 0             | 1                 | N/A                | N/A             | 0                        | 1            | 0            | 0            | 0                | N/A          | 1                   | 1                | N/A             | N/A         | N/A          |
| Smith 1994       | Case-control        | Breast cancer                         | 0             | 1                 | N/A                | N/A             | 1                        | 1            | 0            | 0            | 0                | N/A          | 0                   | 1                | N/A             | N/A         | N/A          |
| Strumylaite 2017 | Case-control        | Breast cancer                         | 0             | 1                 | N/A                | N/A             | 0                        | 0            | 0            | 0            | 0                | N/A          | 0                   | 1                | N/A             | N/A         | N/A          |
| Tang 2013        | Case-control        | Breast cancer                         | 0             | 1                 | N/A                | N/A             | 1                        | 0            | 0            | 0            | 0                | N/A          | 0                   | 1                | N/A             | N/A         | N/A          |
| Tong 2014        | Case-control        | Breast cancer                         | 0             | 1                 | N/A                | N/A             | 0                        | 1            | 0            | 0            | 0                | N/A          | 1                   | 1                | N/A             | N/A         | N/A          |
| Wartenberg 2000  | Prospective cohort  | Breast cancer                         | 0             | 0                 | N/A                | N/A             | 0                        | 0            | 0            | 0            | 0                | N/A          | 1                   | 0                | N/A             | N/A         | N/A          |
| White 2017       | Prospective cohort  | Breast cancer                         | 0             | 0                 | N/A                | N/A             | 0                        | 0            | 0            | 0            | 0                | N/A          | 1                   | 1                | N/A             | N/A         | N/A          |
| Woo 2000         | Nested case-control | Breast cancer                         | 1             | 1                 | N/A                | N/A             | 1                        | 1            | 1            | 0            | 0                | N/A          | 1                   | 0                | N/A             | N/A         | N/A          |
| Xue 2011         | Prospective cohort  | Breast cancer                         | 0             | 0                 | N/A                | N/A             | 0                        | 1            | 0            | 0            | 0                | N/A          | 0                   | 1                | N/A             | N/A         | N/A          |
| Yassin 2018      | Case-control        | Breast cancer                         | 0             | 1                 | N/A                | N/A             | 1                        | 1            | 1            | 1            | 1                | N/A          | 1                   | 0                | N/A             | N/A         | N/A          |
| Zahali 2021      | Case-control        | Breast cancer                         | 0             | 1                 | N/A                | N/A             | 1                        | 1            | 1            | 0            | 0                | N/A          | 0                   | 0                | N/A             | N/A         | N/A          |
| Zhao 1999        | Case-control        | Breast cancer                         | 0             | 1                 | N/A                | N/A             | 1                        | 1            | 1            | 1            | 1                | N/A          | 1                   | 0                | N/A             | N/A         | N/A          |
| Behrendt 2005    | Case-control        | Chronic obstructive pulmonary disease | 0             | 1                 | 0                  | 1               | 0                        | 1            | 1            | 0            | 0                | 0            | 0                   | 0                | N/A             | N/A         | N/A          |

**Table S20. Bias covariates tested in the primary model for each health outcome, by study**

| Author          | Study design       | Health outcome                        | Subpopulation | Not prosp. cohort | Out. self-reported | Exp. assessment | Potential selection bias | Adj. level 0 | Adj. level 1 | Adj. level 2 | Not adj. smoking | Females only | Broad location exp. | Not current exp. | Asthma children | Hem. stroke | Isch. stroke |
|-----------------|--------------------|---------------------------------------|---------------|-------------------|--------------------|-----------------|--------------------------|--------------|--------------|--------------|------------------|--------------|---------------------|------------------|-----------------|-------------|--------------|
| Chan-Yeung 2007 | Case-control       | Chronic obstructive pulmonary disease | 0             | 1                 | 0                  | 1               | 1                        | 1            | 1            | 1            | 1                | 0            | 0                   | 0                | N/A             | N/A         | N/A          |
| Chen 2013       | Case-control       | Chronic obstructive pulmonary disease | 1             | 1                 | 0                  | 1               | 0                        | 1            | 0            | 0            | 0                | 0            | 1                   | 0                | N/A             | N/A         | N/A          |
| David 2005      | Prospective cohort | Chronic obstructive pulmonary disease | 0             | 0                 | 1                  | 1               | 0                        | 1            | 1            | 0            | 0                | 0            | 0                   | 1                | N/A             | N/A         | N/A          |
| Dennis 1996     | Case-control       | Chronic obstructive pulmonary disease | 0             | 1                 | 0                  | 1               | 1                        | 1            | 1            | 1            | 1                | 0            | 1                   | 0                | N/A             | N/A         | N/A          |
| Ding 2015       | Case-control       | Chronic obstructive pulmonary disease | 1             | 1                 | 0                  | 1               | 0                        | 1            | 1            | 1            | 1                | 1            | 1                   | 0                | N/A             | N/A         | N/A          |
| Diver 2018      | Prospective cohort | Chronic obstructive pulmonary disease | 1             | 0                 | 0                  | 0               | 0                        | 0            | 0            | 0            | 0                | 0            | 1                   | 0                | N/A             | N/A         | N/A          |
| Enstrom 2003    | Prospective cohort | Chronic obstructive pulmonary disease | 0             | 0                 | 0                  | 0               | 0                        | 0            | 0            | 0            | 0                | 0            | 1                   | 0                | N/A             | N/A         | N/A          |

**Table S20. Bias covariates tested in the primary model for each health outcome, by study**

| Author           | Study design       | Health outcome                        | Subpopulation | Not prosp. cohort | Out. self-reported | Exp. assessment | Potential selection bias | Adj. level 0 | Adj. level 1 | Adj. level 2 | Not adj. smoking | Females only | Broad location exp. | Not current exp. | Asthma children | Hem. stroke | Isch. stroke |
|------------------|--------------------|---------------------------------------|---------------|-------------------|--------------------|-----------------|--------------------------|--------------|--------------|--------------|------------------|--------------|---------------------|------------------|-----------------|-------------|--------------|
| Gerbase 2006     | Prospective cohort | Chronic obstructive pulmonary disease | 0             | 0                 | 0                  | 1               | 0                        | 1            | 0            | 0            | 0                | 0            | 1                   | 0                | N/A             | N/A         | N/A          |
| He 2012          | Prospective cohort | Chronic obstructive pulmonary disease | 0             | 0                 | 0                  | 1               | 0                        | 0            | 0            | 0            | 0                | 0            | 0                   | 0                | N/A             | N/A         | N/A          |
| Huang 2019       | Case-control       | Chronic obstructive pulmonary disease | 0             | 1                 | 0                  | 1               | 0                        | 0            | 0            | 0            | 0                | 0            | 1                   | 0                | N/A             | N/A         | N/A          |
| Johannessen 2012 | Case-control       | Chronic obstructive pulmonary disease | 0             | 1                 | 0                  | 1               | 0                        | 1            | 0            | 0            | 0                | 0            | 0                   | 0                | N/A             | N/A         | N/A          |
| Johannessen 2012 | Case-control       | Chronic obstructive pulmonary disease | 0             | 1                 | 0                  | 1               | 0                        | 1            | 1            | 1            | 1                | 0            | 0                   | 0                | N/A             | N/A         | N/A          |
| Lee 1986         | Case-control       | Chronic obstructive pulmonary disease | 0             | 1                 | 0                  | 1               | 0                        | 1            | 1            | 0            | 0                | 0            | 1                   | 1                | N/A             | N/A         | N/A          |
| McGhee 2005      | Case-control       | Chronic obstructive pulmonary disease | 0             | 1                 | 0                  | 1               | 0                        | 1            | 1            | 0            | 0                | 0            | 1                   | 1                | N/A             | N/A         | N/A          |

**Table S20. Bias covariates tested in the primary model for each health outcome, by study**

| Author       | Study design        | Health outcome                        | Subpopulation | Not prosp. cohort | Out. self-reported | Exp. assessment | Potential selection bias | Adj. level 0 | Adj. level 1 | Adj. level 2 | Not adj. smoking | Females only | Broad location exp. | Not current exp. | Asthma children | Hem. stroke | Isch. stroke |
|--------------|---------------------|---------------------------------------|---------------|-------------------|--------------------|-----------------|--------------------------|--------------|--------------|--------------|------------------|--------------|---------------------|------------------|-----------------|-------------|--------------|
| Pahwa 2019   | Prospective cohort  | Chronic obstructive pulmonary disease | 0             | 0                 | 1                  | 1               | 1                        | 1            | 0            | 0            | 0                | 0            | 1                   | 0                | N/A             | N/A         | N/A          |
| Salama 2020  | Case-control        | Chronic obstructive pulmonary disease | 0             | 1                 | 0                  | 1               | 1                        | 1            | 1            | 0            | 0                | 0            | 1                   | 1                | N/A             | N/A         | N/A          |
| Salameh 2012 | Case-control        | Chronic obstructive pulmonary disease | 0             | 1                 | 0                  | 1               | 1                        | 1            | 1            | 1            | 0                | 1            | 0                   | 0                | N/A             | N/A         | N/A          |
| Sandler 1989 | Prospective cohort  | Chronic obstructive pulmonary disease | 1             | 0                 | 0                  | 1               | 0                        | 1            | 0            | 0            | 0                | 0            | 1                   | 0                | N/A             | N/A         | N/A          |
| Vineis 2005  | Nested case-control | Chronic obstructive pulmonary disease | 0             | 1                 | 0                  | 1               | 0                        | 1            | 1            | 0            | 0                | 0            | 0                   | 1                | N/A             | N/A         | N/A          |
| Wu 2010      | Case-control        | Chronic obstructive pulmonary disease | 1             | 1                 | 0                  | 1               | 1                        | 1            | 0            | 0            | 0                | 0            | 0                   | 1                | N/A             | N/A         | N/A          |
| Xu 2007      | Nested case-control | Chronic obstructive pulmonary disease | 1             | 1                 | 0                  | 1               | 0                        | 1            | 1            | 1            | 1                | 0            | 1                   | 1                | N/A             | N/A         | N/A          |

**Table S20. Bias covariates tested in the primary model for each health outcome, by study**

| Author         | Study design         | Health outcome           | Subpopulation | Not prosp. cohort | Out. self-reported | Exp. assessment | Potential selection bias | Adj. level 0 | Adj. level 1 | Adj. level 2 | Not adj. smoking | Females only | Broad location exp. | Not current exp. | Asthma children | Hem. stroke | Isch. stroke |
|----------------|----------------------|--------------------------|---------------|-------------------|--------------------|-----------------|--------------------------|--------------|--------------|--------------|------------------|--------------|---------------------|------------------|-----------------|-------------|--------------|
| Hayashino 2008 | Prospective cohort   | Diabetes mellitus type 2 | 0             | 0                 | 0                  | 0               | 1                        | N/A          | N/A          | N/A          | N/A              | N/A          | 0                   | 0                | N/A             | N/A         | N/A          |
| Huang 2020     | Prospective cohort   | Diabetes mellitus type 2 | 0             | 0                 | 0                  | 1               | 0                        | N/A          | N/A          | N/A          | N/A              | N/A          | 1                   | 0                | N/A             | N/A         | N/A          |
| Jiang 2019     | Prospective cohort   | Diabetes mellitus type 2 | 0             | 0                 | 1                  | 1               | 1                        | N/A          | N/A          | N/A          | N/A              | N/A          | 1                   | 1                | N/A             | N/A         | N/A          |
| Kim 2021       | Retrospective cohort | Diabetes mellitus type 2 | 0             | 1                 | 0                  | 1               | 0                        | N/A          | N/A          | N/A          | N/A              | N/A          | 0                   | 0                | N/A             | N/A         | N/A          |
| Kowall 2010    | Prospective cohort   | Diabetes mellitus type 2 | 1             | 0                 | 0                  | 1               | 1                        | N/A          | N/A          | N/A          | N/A              | N/A          | 0                   | 0                | N/A             | N/A         | N/A          |
| Oba 2020       | Prospective cohort   | Diabetes mellitus type 2 | 0             | 0                 | 1                  | 0               | 0                        | N/A          | N/A          | N/A          | N/A              | N/A          | 1                   | 0                | N/A             | N/A         | N/A          |
| Rias 2020      | Case-control         | Diabetes mellitus type 2 | 0             | 1                 | 0                  | 1               | 0                        | N/A          | N/A          | N/A          | N/A              | N/A          | 1                   | 1                | N/A             | N/A         | N/A          |
| Zeng 2022      | Case-control         | Diabetes mellitus type 2 | 1             | 1                 | 0                  | 1               | 0                        | N/A          | N/A          | N/A          | N/A              | N/A          | 1                   | 0                | N/A             | N/A         | N/A          |
| Zhang 2011     | Prospective cohort   | Diabetes mellitus type 2 | 0             | 0                 | 1                  | 1               | 0                        | N/A          | N/A          | N/A          | N/A              | N/A          | 1                   | 0                | N/A             | N/A         | N/A          |



**Table S20. Bias covariates tested in the primary model for each health outcome, by study**

| Author       | Study design       | Health outcome         | Subpopulation | Not prosp. cohort | Out. self-reported | Exp. assessment | Potential selection bias | Adj. level 0 | Adj. level 1 | Adj. level 2 | Not adj. smoking | Females only | Broad location exp. | Not current exp. | Asthma children | Hem. stroke | Isch. stroke |
|--------------|--------------------|------------------------|---------------|-------------------|--------------------|-----------------|--------------------------|--------------|--------------|--------------|------------------|--------------|---------------------|------------------|-----------------|-------------|--------------|
| Attard 2017  | Case-control       | Ischemic heart disease | 1             | 1                 | N/A                | 1               | 0                        | 0            | 0            | 0            | 0                | N/A          | 1                   | 1                | N/A             | N/A         | N/A          |
| Awawdi 2016  | Case-control       | Ischemic heart disease | 0             | 1                 | N/A                | 1               | 0                        | 1            | 1            | 0            | 0                | N/A          | 1                   | 1                | N/A             | N/A         | N/A          |
| Ciruzzi 1998 | Case-control       | Ischemic heart disease | 0             | 1                 | N/A                | 1               | 0                        | 0            | 0            | 0            | 0                | N/A          | 1                   | 0                | N/A             | N/A         | N/A          |
| Clark 2013   | Prospective cohort | Ischemic heart disease | 0             | 0                 | N/A                | 1               | 0                        | 1            | 0            | 0            | 0                | N/A          | 0                   | 1                | N/A             | N/A         | N/A          |
| Ding 2009    | Case-control       | Ischemic heart disease | 0             | 1                 | N/A                | 1               | 0                        | 0            | 0            | 0            | 0                | N/A          | 1                   | 1                | N/A             | N/A         | N/A          |
| Diver 2018   | Prospective cohort | Ischemic heart disease | 1             | 0                 | N/A                | 0               | 0                        | 0            | 0            | 0            | 0                | N/A          | 1                   | 0                | N/A             | N/A         | N/A          |
| Dobson 1991  | Case-control       | Ischemic heart disease | 1             | 1                 | N/A                | 1               | 1                        | 1            | 1            | 0            | 0                | N/A          | 0                   | 0                | N/A             | N/A         | N/A          |
| Enstrom 2003 | Prospective cohort | Ischemic heart disease | 0             | 0                 | N/A                | 0               | 0                        | 0            | 0            | 0            | 0                | N/A          | 1                   | 0                | N/A             | N/A         | N/A          |
| Fatmi 2014   | Case-control       | Ischemic heart disease | 0             | 1                 | N/A                | 1               | 0                        | 1            | 1            | 1            | 1                | N/A          | 1                   | 1                | N/A             | N/A         | N/A          |
| Gallo 2010   | Prospective cohort | Ischemic heart disease | 0             | 0                 | N/A                | 1               | 1                        | 1            | 0            | 0            | 0                | N/A          | 1                   | 0                | N/A             | N/A         | N/A          |
| Garland 1985 | Prospective cohort | Ischemic heart disease | 0             | 0                 | N/A                | 1               | 0                        | 1            | 1            | 1            | 0                | N/A          | 1                   | 0                | N/A             | N/A         | N/A          |
| He 1994      | Case-control       | Ischemic heart disease | 0             | 1                 | N/A                | 1               | 0                        | 0            | 0            | 0            | 0                | N/A          | 0                   | 1                | N/A             | N/A         | N/A          |

**Table S20. Bias covariates tested in the primary model for each health outcome, by study**

| Author             | Study design        | Health outcome         | Subpopulation | Not prosp. cohort | Out. self-reported | Exp. assessment | Potential selection bias | Adj. level 0 | Adj. level 1 | Adj. level 2 | Not adj. smoking | Females only | Broad location exp. | Not current exp. | Asthma children | Hem. stroke | Isch. stroke |
|--------------------|---------------------|------------------------|---------------|-------------------|--------------------|-----------------|--------------------------|--------------|--------------|--------------|------------------|--------------|---------------------|------------------|-----------------|-------------|--------------|
| He 2012            | Prospective cohort  | Ischemic heart disease | 0             | 0                 | N/A                | 1               | 0                        | 0            | 0            | 0            | 0                | N/A          | 0                   | 1                | N/A             | N/A         | N/A          |
| Hill 2007          | Prospective cohort  | Ischemic heart disease | 0             | 0                 | N/A                | 1               | 0                        | 1            | 0            | 0            | 0                | N/A          | 1                   | 0                | N/A             | N/A         | N/A          |
| Hole 1989          | Prospective cohort  | Ischemic heart disease | 1             | 0                 | N/A                | 1               | 0                        | 1            | 1            | 0            | 0                | N/A          | 1                   | 0                | N/A             | N/A         | N/A          |
| Janghorbani 1997   | Case-control        | Ischemic heart disease | 0             | 1                 | N/A                | 1               | 0                        | 1            | 1            | 0            | 0                | N/A          | 1                   | 1                | N/A             | N/A         | N/A          |
| Kastorini 2013     | Case-control        | Ischemic heart disease | 0             | 1                 | N/A                | 1               | 0                        | 0            | 0            | 0            | 0                | N/A          | 1                   | 0                | N/A             | N/A         | N/A          |
| Kawachi 1997       | Prospective cohort  | Ischemic heart disease | 0             | 0                 | N/A                | 1               | 0                        | 0            | 0            | 0            | 0                | N/A          | 0                   | 0                | N/A             | N/A         | N/A          |
| Kobayashi 2022     | Prospective cohort  | Ischemic heart disease | 0             | 0                 | N/A                | 1               | 1                        | 0            | 0            | 0            | 0                | N/A          | 1                   | 0                | N/A             | N/A         | N/A          |
| La 1993            | Nested case-control | Ischemic heart disease | 0             | 1                 | N/A                | 1               | 0                        | 0            | 0            | 0            | 0                | N/A          | 1                   | 0                | N/A             | N/A         | N/A          |
| Lee 1986           | Case-control        | Ischemic heart disease | 0             | 1                 | N/A                | 1               | 0                        | 1            | 1            | 1            | 0                | N/A          | 1                   | 1                | N/A             | N/A         | N/A          |
| Malinauskiene 2011 | Case-control        | Ischemic heart disease | 0             | 1                 | N/A                | 1               | 1                        | 1            | 0            | 0            | 0                | N/A          | 1                   | 0                | N/A             | N/A         | N/A          |
| McElduff 1998      | Case-control        | Ischemic heart disease | 1             | 1                 | N/A                | 1               | 1                        | 1            | 1            | 1            | 0                | N/A          | 0                   | 0                | N/A             | N/A         | N/A          |
| McElduff 1998      | Case-control        | Ischemic heart disease | 1             | 1                 | N/A                | 1               | 0                        | 1            | 1            | 1            | 0                | N/A          | 0                   | 0                | N/A             | N/A         | N/A          |

**Table S20. Bias covariates tested in the primary model for each health outcome, by study**

| Author         | Study design       | Health outcome         | Subpopulation | Not prosp. cohort | Out. self-reported | Exp. assessment | Potential selection bias | Adj. level 0 | Adj. level 1 | Adj. level 2 | Not adj. smoking | Females only | Broad location exp. | Not current exp. | Asthma children | Hem. stroke | Isch. stroke |
|----------------|--------------------|------------------------|---------------|-------------------|--------------------|-----------------|--------------------------|--------------|--------------|--------------|------------------|--------------|---------------------|------------------|-----------------|-------------|--------------|
| McGhee 2005    | Case-control       | Ischemic heart disease | 0             | 1                 | N/A                | 1               | 0                        | 1            | 1            | 0            | 0                | N/A          | 1                   | 1                | N/A             | N/A         | N/A          |
| Muscat 1995    | Case-control       | Ischemic heart disease | 0             | 1                 | N/A                | 1               | 0                        | 1            | 0            | 0            | 0                | N/A          | 1                   | 0                | N/A             | N/A         | N/A          |
| Nishtar 2004   | Case-control       | Ischemic heart disease | 0             | 1                 | N/A                | 1               | 1                        | 1            | 1            | 1            | 1                | N/A          | 1                   | 0                | N/A             | N/A         | N/A          |
| Notara 2015    | Prospective cohort | Ischemic heart disease | 0             | 0                 | N/A                | 1               | 0                        | 0            | 0            | 0            | 0                | N/A          | 0                   | 0                | N/A             | N/A         | N/A          |
| Pitsavos 2002  | Case-control       | Ischemic heart disease | 1             | 1                 | N/A                | 1               | 0                        | 0            | 0            | 0            | 0                | N/A          | 0                   | 1                | N/A             | N/A         | N/A          |
| Rashid 2019    | Case-control       | Ischemic heart disease | 0             | 1                 | N/A                | 1               | 1                        | 1            | 1            | 1            | 1                | N/A          | 0                   | 0                | N/A             | N/A         | N/A          |
| Rosenlund 2001 | Case-control       | Ischemic heart disease | 1             | 1                 | N/A                | 1               | 1                        | 0            | 0            | 0            | 0                | N/A          | 0                   | 0                | N/A             | N/A         | N/A          |
| Rossi 2011     | Case-control       | Ischemic heart disease | 0             | 1                 | N/A                | 1               | 0                        | 1            | 1            | 0            | 0                | N/A          | 1                   | 0                | N/A             | N/A         | N/A          |
| Sadeghi 2020   | Prospective cohort | Ischemic heart disease | 0             | 0                 | N/A                | 1               | 0                        | 1            | 0            | 0            | 0                | N/A          | 0                   | 1                | N/A             | N/A         | N/A          |
| Sandler 1989   | Prospective cohort | Ischemic heart disease | 1             | 0                 | N/A                | 1               | 0                        | 1            | 0            | 0            | 0                | N/A          | 1                   | 0                | N/A             | N/A         | N/A          |
| Spencer 1999   | Case-control       | Ischemic heart disease | 1             | 1                 | N/A                | 1               | 1                        | 1            | 1            | 1            | 1                | N/A          | 0                   | 1                | N/A             | N/A         | N/A          |
| Steenland 1996 | Prospective cohort | Ischemic heart disease | 0             | 0                 | N/A                | 1               | 0                        | 0            | 0            | 0            | 0                | N/A          | 1                   | 0                | N/A             | N/A         | N/A          |

**Table S20. Bias covariates tested in the primary model for each health outcome, by study**

| Author         | Study design       | Health outcome               | Subpopulation | Not prosp. cohort | Out. self-reported | Exp. assessment | Potential selection bias | Adj. level 0 | Adj. level 1 | Adj. level 2 | Not adj. smoking | Females only | Broad location exp. | Not current exp. | Asthma children | Hem. stroke | Isch. stroke |
|----------------|--------------------|------------------------------|---------------|-------------------|--------------------|-----------------|--------------------------|--------------|--------------|--------------|------------------|--------------|---------------------|------------------|-----------------|-------------|--------------|
| Sulo 2008      | Case-control       | Ischemic heart disease       | 1             | 1                 | N/A                | 1               | 1                        | 0            | 0            | 0            | 0                | N/A          | 1                   | 0                | N/A             | N/A         | N/A          |
| Svendson 1987  | Prospective cohort | Ischemic heart disease       | 0             | 0                 | N/A                | 1               | 0                        | 0            | 0            | 0            | 0                | N/A          | 1                   | 0                | N/A             | N/A         | N/A          |
| Almirall 2014  | Case-control       | Lower respiratory infections | 1             | 1                 | 0                  | 1               | 1                        | N/A          | 1            | 0            | N/A              | N/A          | N/A                 | 0                | 1               | N/A         | N/A          |
| Arlington 2019 | Prospective cohort | Lower respiratory infections | 0             | 0                 | 1                  | 1               | 0                        | N/A          | 1            | 0            | N/A              | N/A          | N/A                 | 0                | 0               | N/A         | N/A          |
| Baker 2006     | Prospective cohort | Lower respiratory infections | 0             | 0                 | 0                  | 1               | 0                        | N/A          | 1            | 0            | N/A              | N/A          | N/A                 | 0                | 0               | N/A         | N/A          |
| Barsam 2013    | Case-control       | Lower respiratory infections | 0             | 1                 | 0                  | 1               | 1                        | N/A          | 1            | 1            | N/A              | N/A          | N/A                 | 0                | 0               | N/A         | N/A          |
| Behrooz 2018   | Case-control       | Lower respiratory infections | 0             | 1                 | 0                  | 1               | 0                        | N/A          | 1            | 0            | N/A              | N/A          | N/A                 | 1                | 0               | N/A         | N/A          |
| Bermúdez 2021  | Prospective cohort | Lower respiratory infections | 0             | 0                 | 0                  | 1               | 0                        | N/A          | 1            | 1            | N/A              | N/A          | N/A                 | 1                | 0               | N/A         | N/A          |
| Broor 2001     | Case-control       | Lower respiratory infections | 0             | 1                 | 0                  | 1               | 1                        | N/A          | 1            | 1            | N/A              | N/A          | N/A                 | 0                | 0               | N/A         | N/A          |

**Table S20. Bias covariates tested in the primary model for each health outcome, by study**

| Author         | Study design       | Health outcome               | Subpopulation | Not prosp. cohort | Out. self-reported | Exp. assessment | Potential selection bias | Adj. level 0 | Adj. level 1 | Adj. level 2 | Not adj. smoking | Females only | Broad location exp. | Not current exp. | Asthma children | Hem. stroke | Isch. stroke |
|----------------|--------------------|------------------------------|---------------|-------------------|--------------------|-----------------|--------------------------|--------------|--------------|--------------|------------------|--------------|---------------------|------------------|-----------------|-------------|--------------|
| Broughton 2005 | Prospective cohort | Lower respiratory infections | 0             | 0                 | 0                  | 1               | 1                        | N/A          | 1            | 1            | N/A              | N/A          | N/A                 | 0                | 0               | N/A         | N/A          |
| Charoanca 2013 | Case-control       | Lower respiratory infections | 1             | 1                 | 0                  | 1               | 1                        | N/A          | 0            | 0            | N/A              | N/A          | N/A                 | 1                | 0               | N/A         | N/A          |
| Colley 1974    | Prospective cohort | Lower respiratory infections | 0             | 0                 | 0                  | 0               | 0                        | N/A          | 1            | 1            | N/A              | N/A          | N/A                 | 0                | 0               | N/A         | N/A          |
| Dina 2021      | Case-control       | Lower respiratory infections | 0             | 1                 | 0                  | 1               | 1                        | N/A          | 1            | 0            | N/A              | N/A          | N/A                 | 0                | 0               | N/A         | N/A          |
| Duijts 2008    | Prospective cohort | Lower respiratory infections | 1             | 0                 | 1                  | 1               | 1                        | N/A          | 1            | 1            | N/A              | N/A          | N/A                 | 0                | 0               | N/A         | N/A          |
| Dwedar 2018    | Case-control       | Lower respiratory infections | 0             | 1                 | 0                  | 1               | 1                        | N/A          | 1            | 0            | N/A              | N/A          | N/A                 | 0                | 1               | N/A         | N/A          |
| Farr 2000      | Case-control       | Lower respiratory infections | 1             | 1                 | 0                  | 1               | 1                        | N/A          | 1            | 1            | N/A              | N/A          | N/A                 | 1                | 1               | N/A         | N/A          |
| Farzana 2017   | Case-control       | Lower respiratory infections | 0             | 1                 | 0                  | 1               | 1                        | N/A          | 1            | 0            | N/A              | N/A          | N/A                 | 0                | 0               | N/A         | N/A          |
| Fergusson 1985 | Prospective cohort | Lower respiratory infections | 1             | 0                 | 0                  | 0               | 0                        | N/A          | 1            | 1            | N/A              | N/A          | N/A                 | 0                | 0               | N/A         | N/A          |

**Table S20. Bias covariates tested in the primary model for each health outcome, by study**

| Author                | Study design       | Health outcome               | Subpopulation | Not prosp. cohort | Out. self-reported | Exp. assessment | Potential selection bias | Adj. level 0 | Adj. level 1 | Adj. level 2 | Not adj. smoking | Females only | Broad location exp. | Not current exp. | Asthma children | Hem. stroke | Isch. stroke |
|-----------------------|--------------------|------------------------------|---------------|-------------------|--------------------|-----------------|--------------------------|--------------|--------------|--------------|------------------|--------------|---------------------|------------------|-----------------|-------------|--------------|
| Frassanito 2022       | Case-control       | Lower respiratory infections | 0             | 1                 | 0                  | 1               | 1                        | N/A          | 1            | 0            | N/A              | N/A          | N/A                 | 1                | 0               | N/A         | N/A          |
| Fuentes-Leonarte 2015 | Prospective cohort | Lower respiratory infections | 0             | 0                 | 1                  | 1               | 0                        | N/A          | 1            | 0            | N/A              | N/A          | N/A                 | 0                | 0               | N/A         | N/A          |
| Goetghebuer 2004      | Case-control       | Lower respiratory infections | 0             | 1                 | 0                  | 1               | 1                        | N/A          | 1            | 1            | N/A              | N/A          | N/A                 | 0                | 0               | N/A         | N/A          |
| Grant 2012            | Case-control       | Lower respiratory infections | 1             | 1                 | 0                  | 1               | 0                        | N/A          | 1            | 1            | N/A              | N/A          | N/A                 | 0                | 0               | N/A         | N/A          |
| Hassan 2001           | Case-control       | Lower respiratory infections | 0             | 1                 | 0                  | 1               | 1                        | N/A          | 1            | 1            | N/A              | N/A          | N/A                 | 0                | 0               | N/A         | N/A          |
| Håberg 2007           | Prospective cohort | Lower respiratory infections | 1             | 0                 | 1                  | 0               | 1                        | N/A          | 1            | 0            | N/A              | N/A          | N/A                 | 0                | 0               | N/A         | N/A          |
| Islam 2021            | Case-control       | Lower respiratory infections | 0             | 1                 | 0                  | 1               | 0                        | N/A          | 1            | 1            | N/A              | N/A          | N/A                 | 0                | 0               | N/A         | N/A          |
| Johnson 1992          | Case-control       | Lower respiratory infections | 0             | 1                 | 0                  | 1               | 1                        | N/A          | 1            | 1            | N/A              | N/A          | N/A                 | 0                | 0               | N/A         | N/A          |
| Keskinoglu 2007       | Case-control       | Lower respiratory infections | 0             | 1                 | 0                  | 1               | 1                        | N/A          | 1            | 0            | N/A              | N/A          | N/A                 | 0                | 0               | N/A         | N/A          |

**Table S20. Bias covariates tested in the primary model for each health outcome, by study**

| Author           | Study design         | Health outcome               | Subpopulation | Not prosp. cohort | Out. self-reported | Exp. assessment | Potential selection bias | Adj. level 0 | Adj. level 1 | Adj. level 2 | Not adj. smoking | Females only | Broad location exp. | Not current exp. | Asthma children | Hem. stroke | Isch. stroke |
|------------------|----------------------|------------------------------|---------------|-------------------|--------------------|-----------------|--------------------------|--------------|--------------|--------------|------------------|--------------|---------------------|------------------|-----------------|-------------|--------------|
| Koch 2003        | Prospective cohort   | Lower respiratory infections | 1             | 0                 | 0                  | 1               | 0                        | N/A          | 1            | 0            | N/A              | N/A          | N/A                 | 0                | 0               | N/A         | N/A          |
| Lanari 2015      | Prospective cohort   | Lower respiratory infections | 1             | 0                 | 0                  | 0               | 0                        | N/A          | 1            | 0            | N/A              | N/A          | N/A                 | 1                | 0               | N/A         | N/A          |
| Liu 2022         | Retrospective cohort | Lower respiratory infections | 1             | 1                 | 0                  | 1               | 1                        | N/A          | 1            | 1            | N/A              | N/A          | N/A                 | 0                | 0               | N/A         | N/A          |
| Liyanage 2021    | Case-control         | Lower respiratory infections | 0             | 1                 | 0                  | 1               | 0                        | N/A          | 1            | 0            | N/A              | N/A          | N/A                 | 0                | 0               | N/A         | N/A          |
| Loeb 2009        | Case-control         | Lower respiratory infections | 0             | 1                 | 0                  | 1               | 1                        | N/A          | 1            | 1            | N/A              | N/A          | N/A                 | 0                | 1               | N/A         | N/A          |
| Marbury 1996     | Prospective cohort   | Lower respiratory infections | 0             | 0                 | 0                  | 0               | 1                        | N/A          | 1            | 1            | N/A              | N/A          | N/A                 | 1                | 0               | N/A         | N/A          |
| McConnochie 1986 | Case-control         | Lower respiratory infections | 0             | 1                 | 0                  | 1               | 0                        | N/A          | 1            | 0            | N/A              | N/A          | N/A                 | 1                | 0               | N/A         | N/A          |
| Miyahara 2017    | Prospective cohort   | Lower respiratory infections | 0             | 0                 | 0                  | 1               | 0                        | N/A          | 0            | 0            | N/A              | N/A          | N/A                 | 0                | 0               | N/A         | N/A          |
| Nenna 2017       | Case-control         | Lower respiratory infections | 0             | 1                 | 0                  | 1               | 0                        | N/A          | 1            | 1            | N/A              | N/A          | N/A                 | 0                | 0               | N/A         | N/A          |

**Table S20. Bias covariates tested in the primary model for each health outcome, by study**

| Author              | Study design       | Health outcome               | Subpopulation | Not prosp. cohort | Out. self-reported | Exp. assessment | Potential selection bias | Adj. level 0 | Adj. level 1 | Adj. level 2 | Not adj. smoking | Females only | Broad location exp. | Not current exp. | Asthma children | Hem. stroke | Isch. stroke |
|---------------------|--------------------|------------------------------|---------------|-------------------|--------------------|-----------------|--------------------------|--------------|--------------|--------------|------------------|--------------|---------------------|------------------|-----------------|-------------|--------------|
| Nuesslein 1999      | Prospective cohort | Lower respiratory infections | 1             | 0                 | 1                  | 0               | 0                        | N/A          | 1            | 0            | N/A              | N/A          | N/A                 | 1                | 0               | N/A         | N/A          |
| Pullan 1982         | Case-control       | Lower respiratory infections | 0             | 1                 | 0                  | 1               | 0                        | N/A          | 1            | 0            | N/A              | N/A          | N/A                 | 0                | 0               | N/A         | N/A          |
| Ramesh 2012         | Case-control       | Lower respiratory infections | 1             | 1                 | 0                  | 1               | 1                        | N/A          | 1            | 1            | N/A              | N/A          | N/A                 | 0                | 0               | N/A         | N/A          |
| Robledo-Aceves 2018 | Case-control       | Lower respiratory infections | 0             | 1                 | 0                  | 1               | 1                        | N/A          | 1            | 0            | N/A              | N/A          | N/A                 | 1                | 0               | N/A         | N/A          |
| Roda 2011           | Prospective cohort | Lower respiratory infections | 0             | 0                 | 1                  | 0               | 1                        | N/A          | 1            | 1            | N/A              | N/A          | N/A                 | 0                | 0               | N/A         | N/A          |
| Roux 2015           | Prospective cohort | Lower respiratory infections | 0             | 0                 | 0                  | 1               | 0                        | N/A          | 1            | 0            | N/A              | N/A          | N/A                 | 0                | 0               | N/A         | N/A          |
| Rylander 1995       | Case-control       | Lower respiratory infections | 1             | 1                 | 0                  | 1               | 0                        | N/A          | 1            | 1            | N/A              | N/A          | N/A                 | 0                | 0               | N/A         | N/A          |
| Schulte-Hobein 1992 | Prospective cohort | Lower respiratory infections | 0             | 0                 | 1                  | 0               | 1                        | N/A          | 1            | 1            | N/A              | N/A          | N/A                 | 0                | 0               | N/A         | N/A          |
| Taylor 1987         | Prospective cohort | Lower respiratory infections | 1             | 0                 | 1                  | 1               | 1                        | N/A          | 1            | 1            | N/A              | N/A          | N/A                 | 0                | 0               | N/A         | N/A          |



**Table S20. Bias covariates tested in the primary model for each health outcome, by study**

| Author              | Study design       | Health outcome               | Subpopulation | Not prosp. cohort | Out. self-reported | Exp. assessment | Potential selection bias | Adj. level 0 | Adj. level 1 | Adj. level 2 | Not adj. smoking | Females only | Broad location exp. | Not current exp. | Asthma children | Hem. stroke | Isch. stroke |
|---------------------|--------------------|------------------------------|---------------|-------------------|--------------------|-----------------|--------------------------|--------------|--------------|--------------|------------------|--------------|---------------------|------------------|-----------------|-------------|--------------|
| Tupasi 1990         | Prospective cohort | Lower respiratory infections | 1             | 0                 | 0                  | 1               | 1                        | N/A          | 1            | 0            | N/A              | N/A          | N/A                 | 0                | 0               | N/A         | N/A          |
| Törmänen 2018       | Case-control       | Lower respiratory infections | 0             | 1                 | 0                  | 1               | 0                        | N/A          | 1            | 0            | N/A              | N/A          | N/A                 | 1                | 0               | N/A         | N/A          |
| Verani 2016         | Case-control       | Lower respiratory infections | 0             | 1                 | 0                  | 1               | 1                        | N/A          | 1            | 0            | N/A              | N/A          | N/A                 | 0                | 0               | N/A         | N/A          |
| Victoria 1994       | Case-control       | Lower respiratory infections | 1             | 1                 | 0                  | 1               | 0                        | N/A          | 1            | 1            | N/A              | N/A          | N/A                 | 0                | 0               | N/A         | N/A          |
| Wenten 2005         | Prospective cohort | Lower respiratory infections | 0             | 0                 | 1                  | 1               | 1                        | N/A          | 0            | 0            | N/A              | N/A          | N/A                 | 0                | 0               | N/A         | N/A          |
| Wright 1991         | Prospective cohort | Lower respiratory infections | 0             | 0                 | 0                  | 1               | 0                        | N/A          | 1            | 1            | N/A              | N/A          | N/A                 | 1                | 0               | N/A         | N/A          |
| Adair-Bischoff 1998 | Case-control       | Otitis media                 | 1             | 1                 | 0                  | 1               | 1                        | N/A          | N/A          | 1            | N/A              | N/A          | N/A                 | N/A              | 0               | N/A         | N/A          |
| Alho 1993           | Prospective cohort | Otitis media                 | 1             | 0                 | 0                  | 1               | 0                        | N/A          | N/A          | 1            | N/A              | N/A          | N/A                 | N/A              | 0               | N/A         | N/A          |
| Bentdal 2007        | Prospective cohort | Otitis media                 | 1             | 0                 | 1                  | 0               | 1                        | N/A          | N/A          | 0            | N/A              | N/A          | N/A                 | N/A              | 0               | N/A         | N/A          |
| Clamp 2020          | Prospective cohort | Otitis media                 | 0             | 0                 | 0                  | 0               | 1                        | N/A          | N/A          | 1            | N/A              | N/A          | N/A                 | N/A              | 0               | N/A         | N/A          |

**Table S20. Bias covariates tested in the primary model for each health outcome, by study**

| Author                | Study design       | Health outcome | Subpopulation | Not prosp. cohort | Out. self-reported | Exp. assessment | Potential selection bias | Adj. level 0 | Adj. level 1 | Adj. level 2 | Not adj. smoking | Females only | Broad location exp. | Not current exp. | Asthma children | Hem. stroke | Isch. stroke |
|-----------------------|--------------------|----------------|---------------|-------------------|--------------------|-----------------|--------------------------|--------------|--------------|--------------|------------------|--------------|---------------------|------------------|-----------------|-------------|--------------|
| Collet 1995           | Prospective cohort | Otitis media   | 1             | 0                 | 1                  | 0               | 1                        | N/A          | N/A          | 0            | N/A              | N/A          | N/A                 | N/A              | 0               | N/A         | N/A          |
| Costa 2004            | Case-control       | Otitis media   | 1             | 1                 | 0                  | 1               | 0                        | N/A          | N/A          | 0            | N/A              | N/A          | N/A                 | N/A              | 0               | N/A         | N/A          |
| Daigler 1991          | Case-control       | Otitis media   | 0             | 1                 | 0                  | 1               | 1                        | N/A          | N/A          | 1            | N/A              | N/A          | N/A                 | N/A              | 1               | N/A         | N/A          |
| Daly 1999             | Prospective cohort | Otitis media   | 0             | 0                 | 0                  | 0               | 0                        | N/A          | N/A          | 1            | N/A              | N/A          | N/A                 | N/A              | 0               | N/A         | N/A          |
| Daly 2007             | Prospective cohort | Otitis media   | 0             | 0                 | 0                  | 0               | 0                        | N/A          | N/A          | 1            | N/A              | N/A          | N/A                 | N/A              | 0               | N/A         | N/A          |
| Ey 1995               | Prospective cohort | Otitis media   | 1             | 0                 | 0                  | 1               | 0                        | N/A          | N/A          | 1            | N/A              | N/A          | N/A                 | N/A              | 0               | N/A         | N/A          |
| Fuentes-Leonarte 2015 | Prospective cohort | Otitis media   | 0             | 0                 | 0                  | 1               | 0                        | N/A          | N/A          | 0            | N/A              | N/A          | N/A                 | N/A              | 0               | N/A         | N/A          |
| Håberg 2010           | Prospective cohort | Otitis media   | 1             | 0                 | 1                  | 0               | 0                        | N/A          | N/A          | 0            | N/A              | N/A          | N/A                 | N/A              | 0               | N/A         | N/A          |
| Jensen 2013           | Prospective cohort | Otitis media   | 1             | 0                 | 0                  | 1               | 1                        | N/A          | N/A          | 0            | N/A              | N/A          | N/A                 | N/A              | 0               | N/A         | N/A          |
| Koch 2011             | Prospective cohort | Otitis media   | 1             | 0                 | 0                  | 1               | 0                        | N/A          | N/A          | 0            | N/A              | N/A          | N/A                 | N/A              | 0               | N/A         | N/A          |
| Niclasen 2016         | Prospective cohort | Otitis media   | 0             | 0                 | 1                  | 1               | 0                        | N/A          | N/A          | 1            | N/A              | N/A          | N/A                 | N/A              | 0               | N/A         | N/A          |
| Prins-van 2017        | Prospective cohort | Otitis media   | 0             | 0                 | 1                  | 1               | 0                        | N/A          | N/A          | 0            | N/A              | N/A          | N/A                 | N/A              | 0               | N/A         | N/A          |
| Pukander 1985         | Case-control       | Otitis media   | 0             | 1                 | 0                  | 1               | 0                        | N/A          | N/A          | 1            | N/A              | N/A          | N/A                 | N/A              | 0               | N/A         | N/A          |

**Table S20. Bias covariates tested in the primary model for each health outcome, by study**

| Author         | Study design       | Health outcome | Subpopulation | Not prosp. cohort | Out. self-reported | Exp. assessment | Potential selection bias | Adj. level 0 | Adj. level 1 | Adj. level 2 | Not adj. smoking | Females only | Broad location exp. | Not current exp. | Asthma children | Hem. stroke | Isch. stroke |
|----------------|--------------------|----------------|---------------|-------------------|--------------------|-----------------|--------------------------|--------------|--------------|--------------|------------------|--------------|---------------------|------------------|-----------------|-------------|--------------|
| Samson 2020    | Prospective cohort | Otitis media   | 0             | 0                 | 0                  | 1               | 1                        | N/A          | N/A          | 0            | N/A              | N/A          | N/A                 | N/A              | 0               | N/A         | N/A          |
| Stenstrom 1993 | Case-control       | Otitis media   | 0             | 1                 | 0                  | 1               | 0                        | N/A          | N/A          | 0            | N/A              | N/A          | N/A                 | N/A              | 0               | N/A         | N/A          |
| Ståhlberg 1986 | Case-control       | Otitis media   | 1             | 1                 | 0                  | 1               | 0                        | N/A          | N/A          | 1            | N/A              | N/A          | N/A                 | N/A              | 0               | N/A         | N/A          |
| Tainio 1988    | Prospective cohort | Otitis media   | 0             | 0                 | 0                  | 0               | 0                        | N/A          | N/A          | 1            | N/A              | N/A          | N/A                 | N/A              | 0               | N/A         | N/A          |
| Teele 1989     | Prospective cohort | Otitis media   | 0             | 0                 | 0                  | 1               | 1                        | N/A          | N/A          | 1            | N/A              | N/A          | N/A                 | N/A              | 0               | N/A         | N/A          |
| Wijayanti 2021 | Case-control       | Otitis media   | 0             | 1                 | 0                  | 1               | 1                        | N/A          | N/A          | 1            | N/A              | N/A          | N/A                 | N/A              | 0               | N/A         | N/A          |
| Yang 1999      | Case-control       | Otitis media   | 0             | 1                 | 1                  | 1               | 0                        | N/A          | N/A          | 0            | N/A              | N/A          | N/A                 | N/A              | 0               | N/A         | N/A          |
| Anderson 2004  | Case-control       | Stroke         | 1             | 1                 | 0                  | 1               | 1                        | 1            | 1            | 0            | N/A              | 0            | 1                   | 0                | N/A             | 1           | 0            |
| Bonita 1999    | Case-control       | Stroke         | 1             | 1                 | 0                  | 1               | 0                        | 1            | 0            | 0            | N/A              | 0            | 0                   | 1                | N/A             | 0           | 0            |
| Diver 2018     | Prospective cohort | Stroke         | 1             | 0                 | 0                  | 0               | 0                        | 0            | 0            | 0            | N/A              | 0            | 1                   | 0                | N/A             | 0           | 0            |
| Gallo 2010     | Prospective cohort | Stroke         | 0             | 0                 | 0                  | 1               | 1                        | 1            | 0            | 0            | N/A              | 0            | 0                   | 0                | N/A             | 0           | 0            |
| Glymour 2008   | Prospective cohort | Stroke         | 0             | 0                 | 1                  | 1               | 0                        | 0            | 0            | 0            | N/A              | 0            | 1                   | 0                | N/A             | 0           | 0            |
| He 2012        | Prospective cohort | Stroke         | 0             | 0                 | 0                  | 1               | 0                        | 0            | 0            | 0            | N/A              | 0            | 0                   | 1                | N/A             | 0           | 0            |

**Table S20. Bias covariates tested in the primary model for each health outcome, by study**

| Author         | Study design       | Health outcome | Subpopulation | Not prosp. cohort | Out. self-reported | Exp. assessment | Potential selection bias | Adj. level 0 | Adj. level 1 | Adj. level 2 | Not adj. smoking | Females only | Broad location exp. | Not current exp. | Asthma children | Hem. stroke | Isch. stroke |
|----------------|--------------------|----------------|---------------|-------------------|--------------------|-----------------|--------------------------|--------------|--------------|--------------|------------------|--------------|---------------------|------------------|-----------------|-------------|--------------|
| Hill 2007      | Prospective cohort | Stroke         | 0             | 0                 | 0                  | 1               | 0                        | 1            | 1            | 0            | N/A              | 0            | 1                   | 0                | N/A             | 0           | 0            |
| Hill 2007      | Prospective cohort | Stroke         | 0             | 0                 | 0                  | 1               | 0                        | 1            | 0            | 0            | N/A              | 0            | 1                   | 0                | N/A             | 0           | 0            |
| Hou 2017       | Case-control       | Stroke         | 0             | 1                 | 0                  | 1               | 1                        | 1            | 0            | 0            | N/A              | 0            | 1                   | 1                | N/A             | 0           | 0            |
| Kastorini 2013 | Case-control       | Stroke         | 1             | 1                 | 0                  | 1               | 0                        | 0            | 0            | 0            | N/A              | 0            | 1                   | 0                | N/A             | 0           | 1            |
| Kobayashi 2022 | Prospective cohort | Stroke         | 0             | 0                 | 0                  | 1               | 1                        | 0            | 0            | 0            | N/A              | 0            | 1                   | 0                | N/A             | 0           | 0            |
| Lee 1986       | Case-control       | Stroke         | 0             | 1                 | 0                  | 1               | 0                        | 1            | 1            | 1            | N/A              | 1            | 1                   | 1                | N/A             | 0           | 0            |
| Malek 2015     | Prospective cohort | Stroke         | 0             | 0                 | 0                  | 1               | 0                        | 0            | 0            | 0            | N/A              | 0            | 1                   | 0                | N/A             | 0           | 0            |
| McGhee 2005    | Case-control       | Stroke         | 0             | 1                 | 0                  | 1               | 0                        | 1            | 1            | 0            | N/A              | 0            | 1                   | 1                | N/A             | 0           | 0            |
| Nishino 2014   | Prospective cohort | Stroke         | 0             | 0                 | 0                  | 1               | 0                        | 0            | 0            | 0            | N/A              | 0            | 1                   | 0                | N/A             | 0           | 0            |
| Poulsen 2021   | Case-cohort        | Stroke         | 0             | 1                 | 0                  | 1               | 0                        | 1            | 1            | 1            | N/A              | 1            | 0                   | 1                | N/A             | 0           | 0            |
| Qureshi 2005   | Prospective cohort | Stroke         | 1             | 0                 | 0                  | 1               | 0                        | 0            | 0            | 0            | N/A              | 0            | 1                   | 0                | N/A             | 0           | 0            |
| Sandler 1989   | Prospective cohort | Stroke         | 1             | 0                 | 0                  | 1               | 1                        | 1            | 0            | 0            | N/A              | 0            | 1                   | 0                | N/A             | 0           | 0            |
| Wen 2006       | Prospective cohort | Stroke         | 1             | 0                 | 0                  | 0               | 0                        | 0            | 0            | 0            | N/A              | 0            | 1                   | 0                | N/A             | 0           | 0            |

**Table S20. Bias covariates tested in the primary model for each health outcome, by study**

| Author            | Study design       | Health outcome                      | Subpopulation | Not prosp. cohort | Out. self-reported | Exp. assessment | Potential selection bias | Adj. level 0 | Adj. level 1 | Adj. level 2 | Not adj. smoking | Females only | Broad location exp. | Not current exp. | Asthma children | Hem. stroke | Isch. stroke |
|-------------------|--------------------|-------------------------------------|---------------|-------------------|--------------------|-----------------|--------------------------|--------------|--------------|--------------|------------------|--------------|---------------------|------------------|-----------------|-------------|--------------|
| Yamada 2003       | Prospective cohort | Stroke                              | 1             | 0                 | 0                  | 1               | 0                        | 1            | 1            | 1            | N/A              | 0            | 1                   | 1                | N/A             | 1           | 0            |
| You 1999          | Case-control       | Stroke                              | 1             | 1                 | 0                  | 1               | 0                        | 1            | 0            | 0            | N/A              | 0            | 1                   | 1                | N/A             | 0           | 1            |
| Abdel-Rahman 2020 | Prospective cohort | Tracheal, bronchus, and lung cancer | 0             | 0                 | N/A                | 1               | 1                        | 1            | 1            | 0            | 0                | 0            | 0                   | 1                | N/A             | N/A         | N/A          |
| Al-Zoughool 2013  | Case-control       | Tracheal, bronchus, and lung cancer | 0             | 1                 | N/A                | 1               | 1                        | 1            | 1            | 0            | 0                | 0            | 1                   | 1                | N/A             | N/A         | N/A          |
| Asomaning 2008    | Case-control       | Tracheal, bronchus, and lung cancer | 0             | 1                 | N/A                | 1               | 0                        | 1            | 1            | 1            | 0                | 1            | 0                   | 0                | N/A             | N/A         | N/A          |
| Behera 2005       | Case-control       | Tracheal, bronchus, and lung cancer | 0             | 1                 | N/A                | 1               | 1                        | 1            | 1            | 1            | 0                | 0            | 1                   | 1                | N/A             | N/A         | N/A          |
| Boffetta 1998     | Case-control       | Tracheal, bronchus, and lung cancer | 0             | 1                 | N/A                | 1               | 1                        | 1            | 1            | 0            | 0                | 0            | 0                   | 1                | N/A             | N/A         | N/A          |
| Boffetta 1999     | Case-control       | Tracheal, bronchus, and lung cancer | 0             | 1                 | N/A                | 1               | 0                        | 1            | 1            | 0            | 0                | 0            | 0                   | 1                | N/A             | N/A         | N/A          |
| Brownson 1992     | Case-control       | Tracheal, bronchus, and lung cancer | 0             | 1                 | N/A                | 1               | 0                        | 1            | 1            | 0            | 0                | 0            | 1                   | 1                | N/A             | N/A         | N/A          |
| Bräuner 2012      | Prospective cohort | Tracheal, bronchus, and lung cancer | 0             | 0                 | N/A                | 1               | 0                        | 1            | 1            | 1            | 1                | 1            | 0                   | 0                | N/A             | N/A         | N/A          |

**Table S20. Bias covariates tested in the primary model for each health outcome, by study**

| Author          | Study design       | Health outcome                      | Subpopulation | Not prosp. cohort | Out. self-reported | Exp. assessment | Potential selection bias | Adj. level 0 | Adj. level 1 | Adj. level 2 | Not adj. smoking | Females only | Broad location exp. | Not current exp. | Asthma children | Hem. stroke | Isch. stroke |
|-----------------|--------------------|-------------------------------------|---------------|-------------------|--------------------|-----------------|--------------------------|--------------|--------------|--------------|------------------|--------------|---------------------|------------------|-----------------|-------------|--------------|
| Cardenas 1997   | Prospective cohort | Tracheal, bronchus, and lung cancer | 0             | 0                 | N/A                | 1               | 0                        | 0            | 0            | 0            | 0                | 0            | 1                   | 0                | N/A             | N/A         | N/A          |
| Cassidy 2006    | Case-control       | Tracheal, bronchus, and lung cancer | 1             | 1                 | N/A                | 1               | 1                        | 1            | 1            | 1            | 1                | 0            | 0                   | 1                | N/A             | N/A         | N/A          |
| Chan-Yeung 2003 | Case-control       | Tracheal, bronchus, and lung cancer | 0             | 1                 | N/A                | 1               | 1                        | 1            | 0            | 0            | 0                | 0            | 0                   | 0                | N/A             | N/A         | N/A          |
| Chen 2008       | Case-control       | Tracheal, bronchus, and lung cancer | 0             | 1                 | N/A                | 1               | 1                        | 1            | 1            | 1            | 1                | 1            | 0                   | 0                | N/A             | N/A         | N/A          |
| Cheng 2022      | Prospective cohort | Tracheal, bronchus, and lung cancer | 0             | 0                 | N/A                | 1               | 0                        | 0            | 0            | 0            | 0                | 0            | 1                   | 0                | N/A             | N/A         | N/A          |
| Consonni 2018   | Case-control       | Tracheal, bronchus, and lung cancer | 1             | 1                 | N/A                | 1               | 0                        | 1            | 1            | 1            | 1                | 0            | 0                   | 1                | N/A             | N/A         | N/A          |
| Dalager 1986    | Case-control       | Tracheal, bronchus, and lung cancer | 0             | 1                 | N/A                | 1               | 0                        | 1            | 1            | 0            | 0                | 0            | 1                   | 1                | N/A             | N/A         | N/A          |
| Davis 2018      | Case-control       | Tracheal, bronchus, and lung cancer | 0             | 1                 | N/A                | 1               | 1                        | 1            | 1            | 0            | 0                | 0            | 0                   | 1                | N/A             | N/A         | N/A          |
| Du 1995         | Case-control       | Tracheal, bronchus, and lung cancer | 0             | 1                 | N/A                | 1               | 1                        | 1            | 0            | 0            | 0                | 0            | 1                   | 1                | N/A             | N/A         | N/A          |

**Table S20. Bias covariates tested in the primary model for each health outcome, by study**

| Author                | Study design       | Health outcome                      | Subpopulation | Not prosp. cohort | Out. self-reported | Exp. assessment | Potential selection bias | Adj. level 0 | Adj. level 1 | Adj. level 2 | Not adj. smoking | Females only | Broad location exp. | Not current exp. | Asthma children | Hem. stroke | Isch. stroke |
|-----------------------|--------------------|-------------------------------------|---------------|-------------------|--------------------|-----------------|--------------------------|--------------|--------------|--------------|------------------|--------------|---------------------|------------------|-----------------|-------------|--------------|
| Enstrom 2003          | Prospective cohort | Tracheal, bronchus, and lung cancer | 0             | 0                 | N/A                | 0               | 0                        | 0            | 0            | 0            | 0                | 0            | 1                   | 0                | N/A             | N/A         | N/A          |
| Ferreccio 2013        | Case-control       | Tracheal, bronchus, and lung cancer | 1             | 1                 | N/A                | 1               | 1                        | 1            | 1            | 1            | 0                | 1            | 1                   | 1                | N/A             | N/A         | N/A          |
| Fontham 1994          | Case-control       | Tracheal, bronchus, and lung cancer | 1             | 1                 | N/A                | 1               | 1                        | 0            | 0            | 0            | 0                | 0            | 0                   | 1                | N/A             | N/A         | N/A          |
| Franco-Marina 2006    | Case-control       | Tracheal, bronchus, and lung cancer | 1             | 1                 | N/A                | 1               | 1                        | 1            | 1            | 0            | 0                | 0            | 1                   | 1                | N/A             | N/A         | N/A          |
| Galeone 2008          | Case-control       | Tracheal, bronchus, and lung cancer | 0             | 1                 | N/A                | 1               | 1                        | 1            | 1            | 0            | 0                | 0            | 0                   | 1                | N/A             | N/A         | N/A          |
| Gallegos-Arreola 2008 | Case-control       | Tracheal, bronchus, and lung cancer | 0             | 1                 | N/A                | 1               | 1                        | 1            | 1            | 1            | 0                | 1            | 1                   | 0                | N/A             | N/A         | N/A          |
| Gao 1987              | Case-control       | Tracheal, bronchus, and lung cancer | 1             | 1                 | N/A                | 1               | 0                        | 1            | 1            | 0            | 0                | 0            | 1                   | 1                | N/A             | N/A         | N/A          |
| Garfinkel 1985        | Case-control       | Tracheal, bronchus, and lung cancer | 0             | 1                 | N/A                | 1               | 1                        | 1            | 1            | 0            | 0                | 0            | 1                   | 1                | N/A             | N/A         | N/A          |
| Ger 1993              | Case-control       | Tracheal, bronchus, and lung cancer | 1             | 1                 | N/A                | 1               | 1                        | 1            | 1            | 1            | 1                | 0            | 0                   | 1                | N/A             | N/A         | N/A          |

**Table S20. Bias covariates tested in the primary model for each health outcome, by study**

| Author                 | Study design       | Health outcome                      | Subpopulation | Not prosp. cohort | Out. self-reported | Exp. assessment | Potential selection bias | Adj. level 0 | Adj. level 1 | Adj. level 2 | Not adj. smoking | Females only | Broad location exp. | Not current exp. | Asthma children | Hem. stroke | Isch. stroke |
|------------------------|--------------------|-------------------------------------|---------------|-------------------|--------------------|-----------------|--------------------------|--------------|--------------|--------------|------------------|--------------|---------------------|------------------|-----------------|-------------|--------------|
| Gorlova 2008           | Case-control       | Tracheal, bronchus, and lung cancer | 0             | 1                 | N/A                | 1               | 1                        | 1            | 1            | 0            | 0                | 0            | 0                   | 1                | N/A             | N/A         | N/A          |
| Han 2017               | Case-control       | Tracheal, bronchus, and lung cancer | 0             | 1                 | N/A                | 1               | 1                        | 1            | 1            | 0            | 0                | 0            | 0                   | 0                | N/A             | N/A         | N/A          |
| Hansen 2021            | Prospective cohort | Tracheal, bronchus, and lung cancer | 1             | 0                 | N/A                | 1               | 1                        | 1            | 0            | 0            | 0                | 0            | 1                   | 1                | N/A             | N/A         | N/A          |
| He 2012                | Prospective cohort | Tracheal, bronchus, and lung cancer | 0             | 0                 | N/A                | 1               | 0                        | 0            | 0            | 0            | 0                | 0            | 0                   | 1                | N/A             | N/A         | N/A          |
| He 2013                | Case-control       | Tracheal, bronchus, and lung cancer | 1             | 1                 | N/A                | 1               | 0                        | 1            | 1            | 1            | 1                | 0            | 0                   | 0                | N/A             | N/A         | N/A          |
| He 2017                | Case-control       | Tracheal, bronchus, and lung cancer | 0             | 1                 | N/A                | 1               | 1                        | 1            | 1            | 1            | 1                | 0            | 0                   | 0                | N/A             | N/A         | N/A          |
| Hernández-Garduño 2004 | Case-control       | Tracheal, bronchus, and lung cancer | 0             | 1                 | N/A                | 1               | 1                        | 1            | 1            | 1            | 0                | 0            | 1                   | 0                | N/A             | N/A         | N/A          |
| Hill 2007              | Prospective cohort | Tracheal, bronchus, and lung cancer | 0             | 0                 | N/A                | 1               | 0                        | 0            | 0            | 0            | 0                | 0            | 1                   | 0                | N/A             | N/A         | N/A          |
| Hirayama 1984          | Prospective cohort | Tracheal, bronchus, and lung cancer | 0             | 0                 | N/A                | 1               | 1                        | 1            | 1            | 0            | 0                | 0            | 1                   | 0                | N/A             | N/A         | N/A          |



**Table S20. Bias covariates tested in the primary model for each health outcome, by study**

| Author        | Study design       | Health outcome                      | Subpopulation | Not prosp. cohort | Out. self-reported | Exp. assessment | Potential selection bias | Adj. level 0 | Adj. level 1 | Adj. level 2 | Not adj. smoking | Females only | Broad location exp. | Not current exp. | Asthma children | Hem. stroke | Isch. stroke |
|---------------|--------------------|-------------------------------------|---------------|-------------------|--------------------|-----------------|--------------------------|--------------|--------------|--------------|------------------|--------------|---------------------|------------------|-----------------|-------------|--------------|
| Hole 1989     | Prospective cohort | Tracheal, bronchus, and lung cancer | 1             | 0                 | N/A                | 1               | 0                        | 1            | 1            | 0            | 0                | 0            | 1                   | 0                | N/A             | N/A         | N/A          |
| Humble 1987   | Case-control       | Tracheal, bronchus, and lung cancer | 0             | 1                 | N/A                | 1               | 0                        | 1            | 1            | 0            | 0                | 0            | 1                   | 1                | N/A             | N/A         | N/A          |
| Janerich 1990 | Case-control       | Tracheal, bronchus, and lung cancer | 0             | 1                 | N/A                | 1               | 0                        | 1            | 1            | 0            | 0                | 0            | 1                   | 1                | N/A             | N/A         | N/A          |
| Jee 1999      | Prospective cohort | Tracheal, bronchus, and lung cancer | 0             | 0                 | N/A                | 1               | 0                        | 1            | 0            | 0            | 0                | 0            | 1                   | 0                | N/A             | N/A         | N/A          |
| Jin 2014      | Case-control       | Tracheal, bronchus, and lung cancer | 1             | 1                 | N/A                | 1               | 1                        | 0            | 0            | 0            | 0                | 0            | 1                   | 0                | N/A             | N/A         | N/A          |
| Johnson 2001  | Case-control       | Tracheal, bronchus, and lung cancer | 0             | 1                 | N/A                | 1               | 1                        | 1            | 0            | 0            | 0                | 0            | 0                   | 1                | N/A             | N/A         | N/A          |
| Jöckel 1998   | Case-control       | Tracheal, bronchus, and lung cancer | 0             | 1                 | N/A                | 1               | 1                        | 1            | 1            | 0            | 0                | 0            | 1                   | 1                | N/A             | N/A         | N/A          |
| Kabat 1984    | Case-control       | Tracheal, bronchus, and lung cancer | 0             | 1                 | N/A                | 1               | 1                        | 1            | 1            | 0            | 0                | 0            | 0                   | 0                | N/A             | N/A         | N/A          |
| Kabat 1995    | Case-control       | Tracheal, bronchus, and lung cancer | 0             | 1                 | N/A                | 1               | 1                        | 1            | 0            | 0            | 0                | 0            | 1                   | 1                | N/A             | N/A         | N/A          |

**Table S20. Bias covariates tested in the primary model for each health outcome, by study**

| Author         | Study design       | Health outcome                      | Subpopulation | Not prosp. cohort | Out. self-reported | Exp. assessment | Potential selection bias | Adj. level 0 | Adj. level 1 | Adj. level 2 | Not adj. smoking | Females only | Broad location exp. | Not current exp. | Asthma children | Hem. stroke | Isch. stroke |
|----------------|--------------------|-------------------------------------|---------------|-------------------|--------------------|-----------------|--------------------------|--------------|--------------|--------------|------------------|--------------|---------------------|------------------|-----------------|-------------|--------------|
| Kabat 1996     | Case-control       | Tracheal, bronchus, and lung cancer | 0             | 1                 | N/A                | 1               | 0                        | 1            | 0            | 0            | 0                | 0            | 1                   | 1                | N/A             | N/A         | N/A          |
| Kalandidi 1990 | Case-control       | Tracheal, bronchus, and lung cancer | 0             | 1                 | N/A                | 1               | 0                        | 1            | 0            | 0            | 0                | 0            | 1                   | 1                | N/A             | N/A         | N/A          |
| Koo 1987       | Case-control       | Tracheal, bronchus, and lung cancer | 0             | 1                 | N/A                | 1               | 0                        | 1            | 0            | 0            | 0                | 0            | 1                   | 1                | N/A             | N/A         | N/A          |
| Kurahashi 2008 | Prospective cohort | Tracheal, bronchus, and lung cancer | 0             | 0                 | N/A                | 1               | 0                        | 1            | 0            | 0            | 0                | 0            | 0                   | 0                | N/A             | N/A         | N/A          |
| Lam 1987       | Case-control       | Tracheal, bronchus, and lung cancer | 0             | 1                 | N/A                | 1               | 0                        | 1            | 1            | 0            | 0                | 0            | 1                   | 1                | N/A             | N/A         | N/A          |
| Lan 2008       | Case-control       | Tracheal, bronchus, and lung cancer | 1             | 1                 | N/A                | 1               | 0                        | 1            | 1            | 1            | 1                | 0            | 1                   | 1                | N/A             | N/A         | N/A          |
| Lee 1986       | Case-control       | Tracheal, bronchus, and lung cancer | 0             | 1                 | N/A                | 1               | 0                        | 1            | 1            | 0            | 0                | 0            | 1                   | 1                | N/A             | N/A         | N/A          |
| Lee 2000       | Case-control       | Tracheal, bronchus, and lung cancer | 0             | 1                 | N/A                | 1               | 0                        | 1            | 1            | 0            | 0                | 0            | 0                   | 1                | N/A             | N/A         | N/A          |
| Li 2002        | Case-cohort        | Tracheal, bronchus, and lung cancer | 0             | 1                 | N/A                | 1               | 0                        | 1            | 1            | 0            | 0                | 0            | 1                   | 0                | N/A             | N/A         | N/A          |

**Table S20. Bias covariates tested in the primary model for each health outcome, by study**

| Author          | Study design       | Health outcome                      | Subpopulation | Not prosp. cohort | Out. self-reported | Exp. assessment | Potential selection bias | Adj. level 0 | Adj. level 1 | Adj. level 2 | Not adj. smoking | Females only | Broad location exp. | Not current exp. | Asthma children | Hem. stroke | Isch. stroke |
|-----------------|--------------------|-------------------------------------|---------------|-------------------|--------------------|-----------------|--------------------------|--------------|--------------|--------------|------------------|--------------|---------------------|------------------|-----------------|-------------|--------------|
| Li 2020         | Prospective cohort | Tracheal, bronchus, and lung cancer | 0             | 0                 | N/A                | 1               | 1                        | 0            | 0            | 0            | 0                | 0            | 0                   | 1                | N/A             | N/A         | N/A          |
| Liang 2009      | Case-control       | Tracheal, bronchus, and lung cancer | 1             | 1                 | N/A                | 1               | 0                        | 1            | 0            | 0            | 0                | 0            | 1                   | 1                | N/A             | N/A         | N/A          |
| Liang 2019      | Case-control       | Tracheal, bronchus, and lung cancer | 0             | 1                 | N/A                | 1               | 1                        | 1            | 0            | 0            | 0                | 0            | 0                   | 1                | N/A             | N/A         | N/A          |
| Liu 1991        | Case-control       | Tracheal, bronchus, and lung cancer | 0             | 1                 | N/A                | 1               | 1                        | 1            | 1            | 1            | 1                | 0            | 1                   | 0                | N/A             | N/A         | N/A          |
| Masjedi 2013    | Case-control       | Tracheal, bronchus, and lung cancer | 0             | 1                 | N/A                | 1               | 0                        | 1            | 1            | 1            | 1                | 0            | 1                   | 0                | N/A             | N/A         | N/A          |
| Mbeje 2022      | Case-control       | Tracheal, bronchus, and lung cancer | 0             | 1                 | N/A                | 1               | 0                        | 0            | 0            | 0            | 0                | 0            | 0                   | 0                | N/A             | N/A         | N/A          |
| McGhee 2005     | Case-control       | Tracheal, bronchus, and lung cancer | 0             | 1                 | N/A                | 1               | 0                        | 1            | 1            | 0            | 0                | 0            | 1                   | 1                | N/A             | N/A         | N/A          |
| Miller 2003     | Case-control       | Tracheal, bronchus, and lung cancer | 0             | 1                 | N/A                | 1               | 0                        | 1            | 1            | 0            | 0                | 0            | 1                   | 0                | N/A             | N/A         | N/A          |
| Minichilli 2022 | Case-control       | Tracheal, bronchus, and lung cancer | 0             | 1                 | N/A                | 1               | 1                        | 1            | 1            | 1            | 1                | 0            | 1                   | 0                | N/A             | N/A         | N/A          |

**Table S20. Bias covariates tested in the primary model for each health outcome, by study**

| Author        | Study design       | Health outcome                      | Subpopulation | Not prosp. cohort | Out. self-reported | Exp. assessment | Potential selection bias | Adj. level 0 | Adj. level 1 | Adj. level 2 | Not adj. smoking | Females only | Broad location exp. | Not current exp. | Asthma children | Hem. stroke | Isch. stroke |
|---------------|--------------------|-------------------------------------|---------------|-------------------|--------------------|-----------------|--------------------------|--------------|--------------|--------------|------------------|--------------|---------------------|------------------|-----------------|-------------|--------------|
| Ng 2005       | Case-control       | Tracheal, bronchus, and lung cancer | 0             | 1                 | N/A                | 1               | 1                        | 1            | 1            | 0            | 0                | 0            | 1                   | 0                | N/A             | N/A         | N/A          |
| Nishino 2001  | Prospective cohort | Tracheal, bronchus, and lung cancer | 0             | 0                 | N/A                | 1               | 0                        | 1            | 1            | 0            | 0                | 0            | 1                   | 0                | N/A             | N/A         | N/A          |
| Phukan 2014   | Case-control       | Tracheal, bronchus, and lung cancer | 0             | 1                 | N/A                | 1               | 1                        | 1            | 1            | 1            | 1                | 0            | 1                   | 0                | N/A             | N/A         | N/A          |
| Pirie 2016    | Prospective cohort | Tracheal, bronchus, and lung cancer | 0             | 0                 | N/A                | 1               | 1                        | 1            | 1            | 0            | 0                | 0            | 1                   | 1                | N/A             | N/A         | N/A          |
| Rapiti 1999   | Case-control       | Tracheal, bronchus, and lung cancer | 0             | 1                 | N/A                | 1               | 1                        | 1            | 1            | 0            | 0                | 0            | 1                   | 1                | N/A             | N/A         | N/A          |
| Raspanti 2016 | Case-control       | Tracheal, bronchus, and lung cancer | 0             | 1                 | N/A                | 1               | 1                        | 1            | 1            | 0            | 0                | 0            | 0                   | 0                | N/A             | N/A         | N/A          |
| Ren 2013      | Case-control       | Tracheal, bronchus, and lung cancer | 0             | 1                 | N/A                | 1               | 0                        | 1            | 1            | 1            | 0                | 0            | 1                   | 0                | N/A             | N/A         | N/A          |
| Robles 2014   | Case-control       | Tracheal, bronchus, and lung cancer | 0             | 1                 | N/A                | 1               | 1                        | 1            | 1            | 1            | 0                | 1            | 1                   | 1                | N/A             | N/A         | N/A          |
| Rylander 2006 | Case-control       | Tracheal, bronchus, and lung cancer | 0             | 1                 | N/A                | 1               | 1                        | 1            | 1            | 1            | 0                | 1            | 1                   | 1                | N/A             | N/A         | N/A          |

**Table S20. Bias covariates tested in the primary model for each health outcome, by study**

| Author         | Study design       | Health outcome                      | Subpopulation | Not prosp. cohort | Out. self-reported | Exp. assessment | Potential selection bias | Adj. level 0 | Adj. level 1 | Adj. level 2 | Not adj. smoking | Females only | Broad location exp. | Not current exp. | Asthma children | Hem. stroke | Isch. stroke |
|----------------|--------------------|-------------------------------------|---------------|-------------------|--------------------|-----------------|--------------------------|--------------|--------------|--------------|------------------|--------------|---------------------|------------------|-----------------|-------------|--------------|
| Sasco 2002     | Case-control       | Tracheal, bronchus, and lung cancer | 0             | 1                 | N/A                | 1               | 0                        | 1            | 1            | 0            | 0                | 0            | 0                   | 1                | N/A             | N/A         | N/A          |
| Schwartz 2007  | Case-control       | Tracheal, bronchus, and lung cancer | 0             | 1                 | N/A                | 1               | 1                        | 1            | 1            | 1            | 1                | 0            | 0                   | 1                | N/A             | N/A         | N/A          |
| Seki 2013      | Case-control       | Tracheal, bronchus, and lung cancer | 0             | 1                 | N/A                | 1               | 0                        | 1            | 0            | 0            | 0                | 0            | 1                   | 1                | N/A             | N/A         | N/A          |
| Shen 1998      | Case-control       | Tracheal, bronchus, and lung cancer | 0             | 1                 | N/A                | 1               | 1                        | 1            | 1            | 0            | 0                | 0            | 1                   | 1                | N/A             | N/A         | N/A          |
| Sloan 2012     | Case-control       | Tracheal, bronchus, and lung cancer | 0             | 1                 | N/A                | 1               | 1                        | 1            | 1            | 0            | 0                | 0            | 1                   | 1                | N/A             | N/A         | N/A          |
| Sobue 1990     | Case-control       | Tracheal, bronchus, and lung cancer | 0             | 1                 | N/A                | 1               | 0                        | 1            | 1            | 0            | 0                | 0            | 1                   | 1                | N/A             | N/A         | N/A          |
| Speizer 1999   | Prospective cohort | Tracheal, bronchus, and lung cancer | 0             | 0                 | N/A                | 1               | 0                        | 1            | 1            | 0            | 0                | 0            | 1                   | 1                | N/A             | N/A         | N/A          |
| Spitz 2011     | Case-control       | Tracheal, bronchus, and lung cancer | 0             | 1                 | N/A                | 1               | 1                        | 1            | 1            | 0            | 0                | 0            | 1                   | 1                | N/A             | N/A         | N/A          |
| Stockwell 1992 | Case-control       | Tracheal, bronchus, and lung cancer | 1             | 1                 | N/A                | 1               | 0                        | 1            | 1            | 0            | 0                | 0            | 1                   | 1                | N/A             | N/A         | N/A          |

**Table S20. Bias covariates tested in the primary model for each health outcome, by study**

| Author            | Study design       | Health outcome                      | Subpopulation | Not prosp. cohort | Out. self-reported | Exp. assessment | Potential selection bias | Adj. level 0 | Adj. level 1 | Adj. level 2 | Not adj. smoking | Females only | Broad location exp. | Not current exp. | Asthma children | Hem. stroke | Isch. stroke |
|-------------------|--------------------|-------------------------------------|---------------|-------------------|--------------------|-----------------|--------------------------|--------------|--------------|--------------|------------------|--------------|---------------------|------------------|-----------------|-------------|--------------|
| Sun 2017          | Prospective cohort | Tracheal, bronchus, and lung cancer | 1             | 0                 | N/A                | 1               | 0                        | 0            | 0            | 0            | 0                | 0            | 1                   | 1                | N/A             | N/A         | N/A          |
| Svensson 1989     | Case-control       | Tracheal, bronchus, and lung cancer | 0             | 1                 | N/A                | 1               | 1                        | 1            | 1            | 0            | 0                | 0            | 0                   | 1                | N/A             | N/A         | N/A          |
| Torres-Durán 2015 | Case-control       | Tracheal, bronchus, and lung cancer | 0             | 1                 | N/A                | 1               | 1                        | 1            | 1            | 0            | 0                | 0            | 1                   | 1                | N/A             | N/A         | N/A          |
| Tubío-Pérez 2022  | Case-control       | Tracheal, bronchus, and lung cancer | 0             | 1                 | N/A                | 1               | 1                        | 1            | 1            | 0            | 0                | 0            | 1                   | 1                | N/A             | N/A         | N/A          |
| Veglia 2007       | Prospective cohort | Tracheal, bronchus, and lung cancer | 0             | 0                 | N/A                | 1               | 1                        | 1            | 1            | 1            | 0                | 0            | 1                   | 0                | N/A             | N/A         | N/A          |
| Villeneuve 2014   | Case-control       | Tracheal, bronchus, and lung cancer | 0             | 1                 | N/A                | 1               | 1                        | 1            | 1            | 1            | 1                | 1            | 0                   | 0                | N/A             | N/A         | N/A          |
| Wang 1994         | Case-control       | Tracheal, bronchus, and lung cancer | 0             | 1                 | N/A                | 1               | 1                        | 1            | 1            | 0            | 0                | 0            | 1                   | 1                | N/A             | N/A         | N/A          |
| Wang 1996         | Case-control       | Tracheal, bronchus, and lung cancer | 0             | 1                 | N/A                | 1               | 1                        | 1            | 0            | 0            | 0                | 0            | 0                   | 0                | N/A             | N/A         | N/A          |
| Wang 1996         | Case-control       | Tracheal, bronchus, and lung cancer | 0             | 1                 | N/A                | 1               | 1                        | 1            | 1            | 0            | 0                | 0            | 1                   | 1                | N/A             | N/A         | N/A          |

**Table S20. Bias covariates tested in the primary model for each health outcome, by study**

| Author        | Study design       | Health outcome                      | Subpopulation | Not prosp. cohort | Out. self-reported | Exp. assessment | Potential selection bias | Adj. level 0 | Adj. level 1 | Adj. level 2 | Not adj. smoking | Females only | Broad location exp. | Not current exp. | Asthma children | Hem. stroke | Isch. stroke |
|---------------|--------------------|-------------------------------------|---------------|-------------------|--------------------|-----------------|--------------------------|--------------|--------------|--------------|------------------|--------------|---------------------|------------------|-----------------|-------------|--------------|
| Wang 2009     | Case-control       | Tracheal, bronchus, and lung cancer | 0             | 1                 | N/A                | 1               | 1                        | 1            | 0            | 0            | 0                | 0            | 0                   | 1                | N/A             | N/A         | N/A          |
| Wang 2015     | Prospective cohort | Tracheal, bronchus, and lung cancer | 0             | 0                 | N/A                | 1               | 0                        | 0            | 0            | 0            | 0                | 0            | 0                   | 1                | N/A             | N/A         | N/A          |
| Weiss 2008    | Prospective cohort | Tracheal, bronchus, and lung cancer | 0             | 0                 | N/A                | 1               | 0                        | 1            | 1            | 1            | 0                | 0            | 0                   | 1                | N/A             | N/A         | N/A          |
| Wen 2006      | Prospective cohort | Tracheal, bronchus, and lung cancer | 1             | 0                 | N/A                | 0               | 0                        | 0            | 0            | 0            | 0                | 0            | 1                   | 0                | N/A             | N/A         | N/A          |
| Wenzlaff 2005 | Case-control       | Tracheal, bronchus, and lung cancer | 0             | 1                 | N/A                | 1               | 1                        | 1            | 1            | 0            | 0                | 0            | 1                   | 1                | N/A             | N/A         | N/A          |
| Wu 1985       | Case-control       | Tracheal, bronchus, and lung cancer | 0             | 1                 | N/A                | 1               | 1                        | 1            | 1            | 0            | 0                | 0            | 0                   | 1                | N/A             | N/A         | N/A          |
| Xu 2020       | Case-control       | Tracheal, bronchus, and lung cancer | 0             | 1                 | N/A                | 1               | 0                        | 1            | 1            | 1            | 1                | 0            | 1                   | 0                | N/A             | N/A         | N/A          |
| Yang 2015     | Case-control       | Tracheal, bronchus, and lung cancer | 0             | 1                 | N/A                | 1               | 1                        | 1            | 0            | 0            | 0                | 0            | 1                   | 1                | N/A             | N/A         | N/A          |
| Yang 2016     | Case-control       | Tracheal, bronchus, and lung cancer | 0             | 1                 | N/A                | 1               | 0                        | 1            | 1            | 0            | 0                | 0            | 1                   | 0                | N/A             | N/A         | N/A          |

**Table S20. Bias covariates tested in the primary model for each health outcome, by study**

| Author         | Study design | Health outcome                      | Subpopulation | Not prosp. cohort | Out. self-reported | Exp. assessment | Potential selection bias | Adj. level 0 | Adj. level 1 | Adj. level 2 | Not adj. smoking | Females only | Broad location exp. | Not current exp. | Asthma children | Hem. stroke | Isch. stroke |
|----------------|--------------|-------------------------------------|---------------|-------------------|--------------------|-----------------|--------------------------|--------------|--------------|--------------|------------------|--------------|---------------------|------------------|-----------------|-------------|--------------|
| Yin 2014       | Case-control | Tracheal, bronchus, and lung cancer | 0             | 1                 | N/A                | 1               | 1                        | 1            | 1            | 0            | 0                | 0            | 1                   | 0                | N/A             | N/A         | N/A          |
| Yoon 2008      | Case-control | Tracheal, bronchus, and lung cancer | 0             | 1                 | N/A                | 1               | 0                        | 1            | 1            | 0            | 0                | 0            | 0                   | 0                | N/A             | N/A         | N/A          |
| Zaridze 1998   | Case-control | Tracheal, bronchus, and lung cancer | 0             | 1                 | N/A                | 1               | 0                        | 1            | 1            | 0            | 0                | 0            | 0                   | 1                | N/A             | N/A         | N/A          |
| Zatloukal 2003 | Case-control | Tracheal, bronchus, and lung cancer | 0             | 1                 | N/A                | 1               | 1                        | 1            | 1            | 1            | 0                | 0            | 1                   | 1                | N/A             | N/A         | N/A          |
| Zhong 1999     | Case-control | Tracheal, bronchus, and lung cancer | 1             | 1                 | N/A                | 1               | 0                        | 1            | 0            | 0            | 0                | 0            | 0                   | 1                | N/A             | N/A         | N/A          |
| Zhuang 2022    | Case-control | Tracheal, bronchus, and lung cancer | 1             | 1                 | N/A                | 1               | 1                        | 0            | 0            | 0            | 0                | 0            | 1                   | 0                | N/A             | N/A         | N/A          |

N/A, not available



## Section 6: Between-study Heterogeneity

The gamma solution ( $\gamma$ ) quantifies the degree of heterogeneity observed in the included observations, while its standard deviation (SD) quantifies the uncertainty around  $\gamma$ , both of which contribute to our final conservative BPRF and RR uncertainty estimates. Across the GBD, within all dichotomous risk factors evaluated using the BPRF methodology, gamma solution values range from 0 to 0.59 with a mean of 0.07 (SD: 0.15).

**Table S21. Between-study heterogeneity ( $\gamma$ ) for each risk-outcome pair**

| Health outcome                        | Gamma solution |
|---------------------------------------|----------------|
| Ischemic heart disease                | 0.002          |
| Stroke                                | 0.000          |
| Diabetes mellitus type 2              | 0.000          |
| Lower respiratory infections          | 0.033          |
| Breast cancer                         | 0.035          |
| Tracheal, bronchus, and lung cancer   | 0.018          |
| Otitis media                          | 0.004          |
| Asthma                                | 0.015          |
| Chronic obstructive pulmonary disease | 0.060          |
